# Supplementary material for: Photocatalyst- and transition-metal-free syntheses of furan-fused dihydroazepines by visible light
Source: Royal Society of Chemistry journal article supplement (doi:10.1039/d3gc02364h), 2023-01-01

## Supporting Information

For

### Photocatalyst- and transition-metal-free syntheses of furan-fused dihydroazepines by visible light

Babasaheb Sopan Gore <sup>\*a</sup>, Chiao-Ying Kuo<sup>a</sup> and Jeh-Jeng Wang<sup>\*a,b</sup>

<sup>a</sup> Department of Medicinal and Applied Chemistry, Kaohsiung Medical University, No. 100, Shiquan 1st Rd, Sanmin District, Kaohsiung City, 807, Taiwan.

<sup>b</sup> Department of Medical Research, Kaohsiung Medical University Hospital, No. 100, Tzyou 1st Rd, Sanmin District, Kaohsiung City, 807, Taiwan

E-mail: jjwang@kmu.edu.tw, gorepranav99@gmail.com

# Table of Contents

|                                                 |           |
|-------------------------------------------------|-----------|
| 1. General Information                          | S3        |
| 2. Experimental Procedures                      | S4-S6     |
| 3. Synthetic Applications                       | S7-S10    |
| 4. Control Studies                              | S11       |
| 5. Light On-Off Experiment                      | S12       |
| 6. Fluorescence Quenching Study                 | S13       |
| 7. Spectral Characterization                    | S14-S29   |
| 8. References                                   | S30       |
| 9. Copies of $^1\text{H}$ , and $^{13}\text{C}$ | S31-S114  |
| 10. X-ray crystal data                          | S115-S146 |

## 1. General Information

$^1\text{H}$ ,  $^{13}\text{C}$ , and DEPT NMR spectra were recorded on a 400 MHz Varian Unity Plus or Varian Mercury plus spectrometer or JEOL ECS-400. The chemical shift ( $\delta$ ) values are reported in parts per million (ppm), and the coupling constants ( $J$ ) are given in Hz. The spectra were recorded using  $\text{CDCl}_3$  as a solvent.  $^1\text{H}$  NMR chemical shifts are referenced to tetramethylsilane (TMS) (0 ppm).  $^{13}\text{C}$  NMR was referenced to  $\text{CDCl}_3$  (77.0 ppm). The abbreviations used are as follows: s, singlet; d, doublet; t, triplet; q, quartet; dd, doublet of doublet; ddd, doublet of doublet of doublet; dt, doublet of triplets; td, triplet of doublet; m, multiplet. Mass spectra and High-Resolution Mass spectral (HRMS) data was carried out using an Agilent6890N GC (JEOL JMS-700) TOF instrument, and the ion source is electrospray ionization (ESI), electronic ionization (EI), CI, and FAB as ion source at National Taiwan Normal University, Taipei City, Taiwan and ESI-TOF (FT-MS solariX) at National Sun Yat-Sen University, Kaohsiung, Taiwan, and LTQ Orbitrap XL (Thermo Fischer Scientific) at National Chung Hsing University. Liquid-chromatography mass spectra (LCMS) were measured using the LC-MS/MS-8045 (Shimadzu Corporation, Japan) at Kaohsiung Medical University, Kaohsiung, Taiwan. Melting points were determined on an EZ-Melt (Automated melting point apparatus). Irradiation of photochemical reactions was carried out using 1 x 40 W Kessil Blue LED lamps<sup>1</sup> purchased from Amazon with an output centred at a wavelength of approximately 462 nm. All products reported showed  $^1\text{H}$  NMR spectra in agreement with the assigned structures. Reaction progress and product mixtures were routinely monitored by TLC using Merck TLC aluminium sheets (silica gel 60 F254). Column chromatography was carried out with 230–400 mesh silica gel 60 (Merck) and a mixture of hexane/ethyl acetate or hexane as eluent.

## 2. Experimental Procedure

### a) General Procedure for the Synthesis of (*E*)-2-aryloxy-3-(2-((*E*)-styryl)aryl/alkyl)acrylonitrile (**1**)<sup>2</sup>

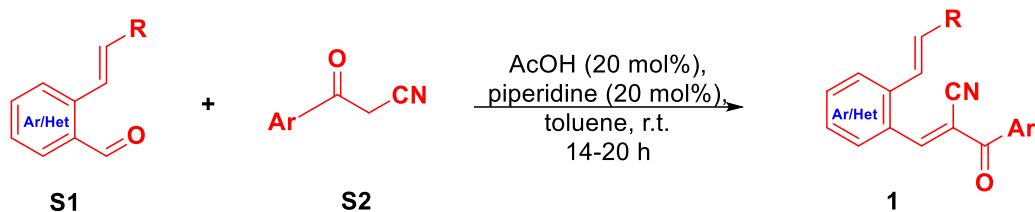

A reaction tube was charged with (*E*)-2-styrylbenzaldehyde (**S1**) (1.0 equiv), 3-oxo-3-arylacetonitriles and derivatives (**S2**) (1.5 equiv), AcOH (20 mol%) and piperidine (20 mol%) in 5.0 mL of toluene. The reaction suspension was stirred at room temperature, and the progress of the reaction was monitored by TLC. Upon completion, water was added to quench the reaction mixture, which was then extracted with ethyl acetate (3×15 mL). Finally, the combined organic layer was dried over sodium sulfate, filtered, and concentrated under vacuum. The residue was purified by column chromatography on silica gel to afford the corresponding (*E*)-2-aryloxy-3-(2-((*E*)-styryl)aryl/alkyl)acrylonitrile derivatives **1**.

### b) General procedure for the synthesis of dihydro-4*H*-benzo[*d*]furo[2,3-*b*]azepine-1-carbonitrile derivatives

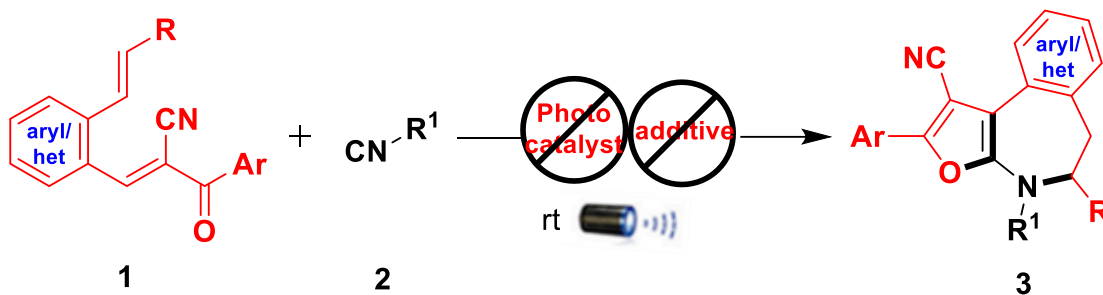

A clean vial (5 mL) equipped with a magnetic stir bar was added to **1** (0.2 mmol). Next, EtOAc (2.0 mL) was added after which, **2** (0.2 mmol) were added at room temperature, and then solution was stirred at room temperature under dark for 20-30 h and placed at a distance of approx. 3.0 cm from a 40 W blue LED, and the visible-light irradiation for 1-10 h. The progress of the reaction was monitored by TLC. When the reaction was complete, water was added to quench the reaction mixture, followed by extraction with ethyl acetate (3×15 mL). Finally, the combined organic layer was dried over sodium sulfate, filtered, and concentrated under vacuum. The residue was purified by column chromatography (Hex/EA = 99/1) on silica gel to afford the corresponding dihydro-4*H*-benzo[*d*]furo[2,3-*b*]azepine-1-carbonitrile derivatives **3**.



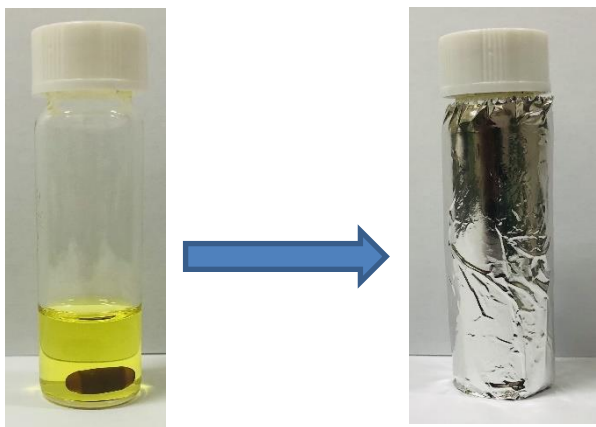

Before reaction 1a + 2a in ethyl acetate

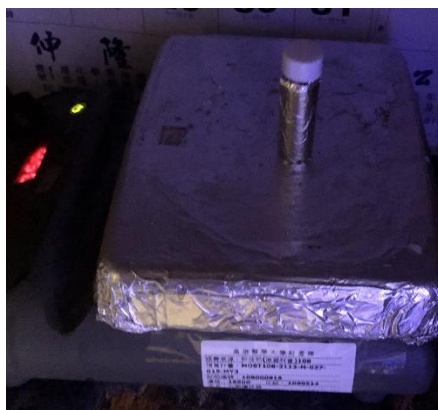

After 20 h (intermediate)

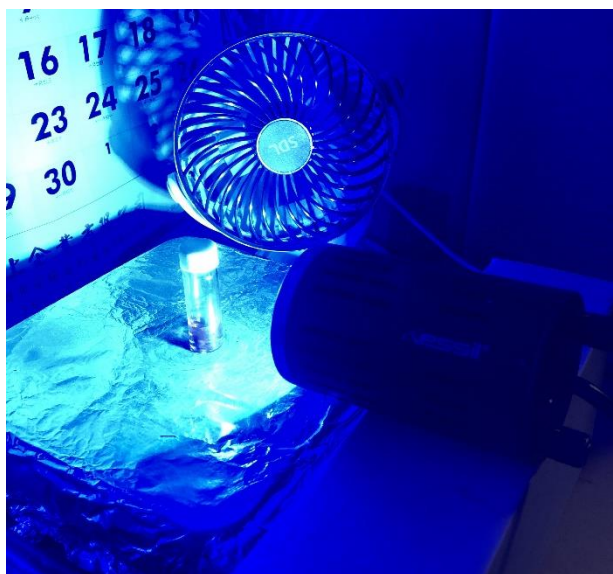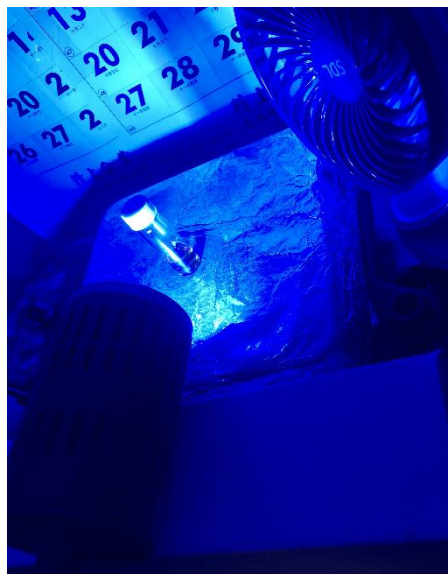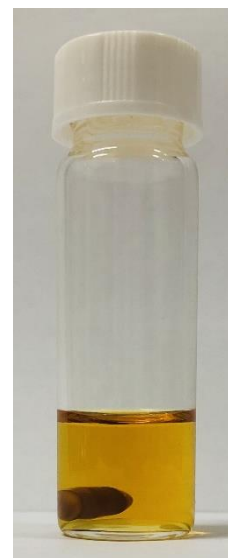

After reaction

Figure S1: Reaction setup

c) General procedure for gram scale synthesis

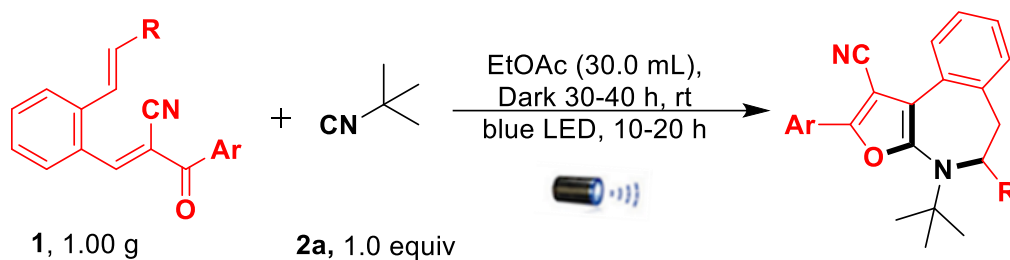

|            |                           |                                       |                                        |
|------------|---------------------------|---------------------------------------|----------------------------------------|
| <b>1 =</b> | <b>1a, R = Ph Ar = Ph</b> | <b>1k, R = Ph, Ar = Ph-<i>m</i>Br</b> | <b>1l, R = Ph, Ar = Ph-<i>o</i>-Br</b> |
| Yield      | <b>3aa, 72 %</b>          | <b>3ka, 60 %</b>                      | <b>3la, 58 %</b>                       |

A clean round-bottomed flask (50 mL) equipped with a magnetic stir bar was added to **1** (1.00 g). Next, EtOAc (0.1 M) was added after which, **2** (1.0 equiv) were added at room temperature, and then solution was stirred at room temperature under dark for 30-40 h and placed at a distance of approx. 3.0 cm from a 40 W blue LED, and the visible-light irradiation for 10-20 h. The progress of the reaction was monitored by TLC. When the reaction was complete, water was added to quench the reaction mixture, followed by extraction with ethyl acetate (3×30 mL). Finally, the combined organic layer was dried over sodium sulfate, filtered, and concentrated under vacuum. The residue was purified by column chromatography (Hex/EA = 99/1) on silica gel to afford the corresponding dihydro-4*H*-benzo[*d*]furo[2,3-*b*]azepine-1-carbonitrile derivatives.

### 3. Synthetic Applications (Scheme S1)

(a) General procedure for the synthesis of 1-(4-(*tert*-butyl)-2,5-diphenyl-5,6-dihydro-4*H*-benzo[*d*]furo[2,3-*b*]azepin-1-yl)ethan-1-one (**3ya**) :

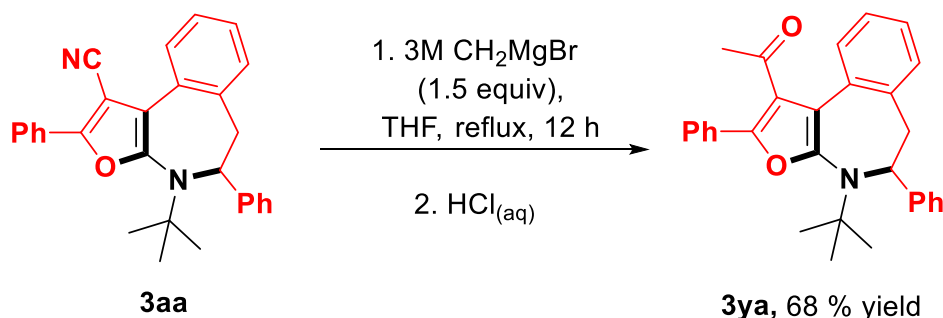

Prepare a clean 15 mL sealed tube with a magnetic stir bar. **3aa** (0.2 mmol) was added to the bottle, followed by the solvent anhydrous THF (3.0 mL), and then the tube was filled with nitrogen. Then 3 M CH<sub>3</sub>MgBr (1.5 equiv) was slowly added dropwise, then heated to about 100 °C to reflux in the tube, and the reaction was monitored by TLC. After the reaction was completed, it was cooled to room temperature and then 1 M aqueous HCl<sub>(aq)</sub> was added, then heating the reaction to reflux for about 1 hour. After reaction finished, cooled the reaction to room temperature, and then extracted with ethyl acetate (3 x 15 mL) and water. Finally, all organic layers were combined and removed with anhydrous sodium sulfate, filtered and concentrated in vacuo. After concentration, the residue was purified by column chromatography (Hex/EA = 99/1) to obtain the product **3ya**.

b) General procedure for the synthesis of 5,6-dihydro-4*H*-benzo[*d*]furo[2,3-*b*]azepine-1-carboxamide (**5** and **8**):

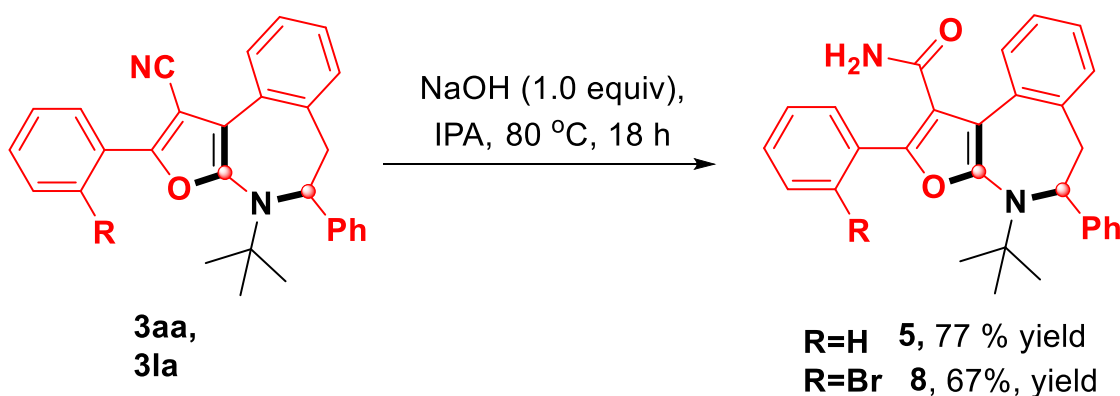

Prepare a clean 15 mL sealed tube with a magnetic stir bar. **3aa/3la** (0.2 mmol) was added to the bottle, followed by the solvent EtOH (3.0 mL). Finally, NaOH (1.0 equiv) was added and the mixture was heated to 80 °C and the reaction was monitored by TLC. After completion of the reaction, water was added to stop the reaction and the reaction was neutralized to about pH=7 by 1 M HCl<sub>(aq)</sub>, then extracted with ethyl acetate (3 x 15 mL) and water. Finally, all organic layers were combined and removed with anhydrous sodium sulfate,

filtered and concentrated in vacuo. After concentration, the residue was purified by column chromatography (Hex/EA = 5/1) to obtain the product.

(c) **General procedure for the synthesis of (Z)-3-oxo-2-(2-oxo-4-phenyl-2,3,4,5-tetrahydro-1H-benzo[d]azepin-1-ylidene)-3-phenylpropanenitrile (6):**

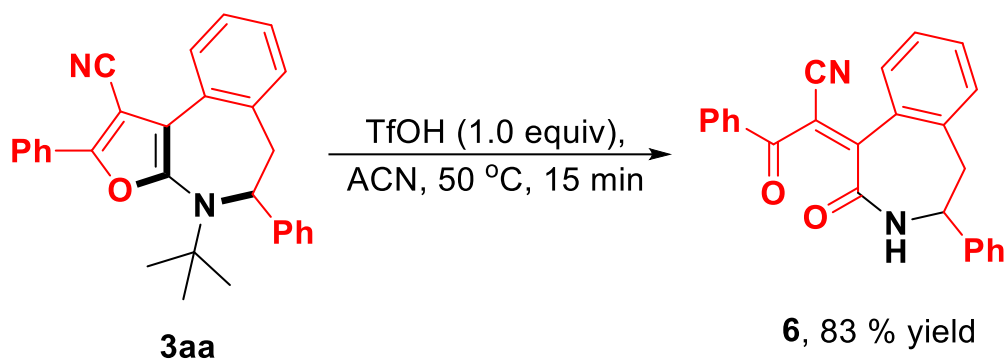

**Synthesis route 1:** Prepare a clean 15 mL sealed tube with a magnetic stir bar. **3aa** (0.1 mmol) and ACN (3.0 mL) were added to the bottle. TfOH (1.0 equiv) was then added slowly, followed by heating to about 50 °C and the reaction monitored by TLC. After the reaction was completed, cooled to room temperature and then added  $\text{Na}_2\text{CO}_3(\text{aq})$  solution to neutralize the reaction to about pH=7. It was then extracted with ethyl acetate (3 x 15 mL) and water. Finally, all organic layers were combined and removed with anhydrous sodium sulfate, filtered and concentrated in vacuo. After concentration, the residue was purified by column chromatography (Hex/EA = 5/1) to obtain the product **6**.

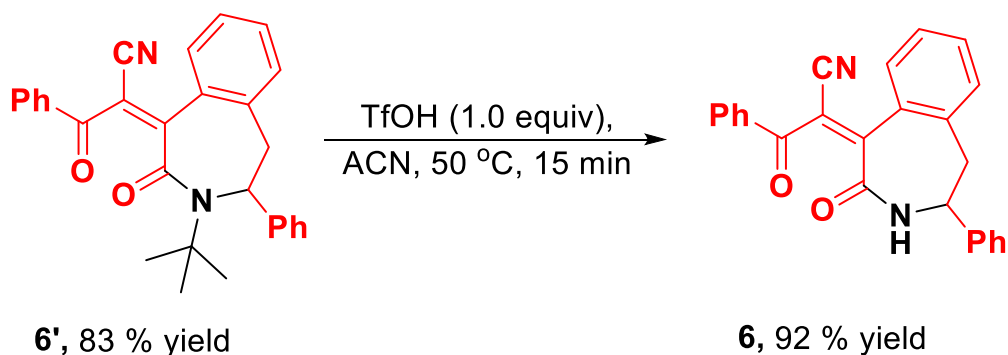

**Synthesis route 2:** Prepare a clean 15 mL sealed tube with a magnetic stir bar. **6'** (0.1 mmol) and ACN (3.0 mL) were added to the bottle. TfOH (1.0 equiv) was then added slowly, followed by heating to about 50 °C and the reaction monitored by TLC. After the reaction was completed, cooled to room temperature and then added  $\text{Na}_2\text{CO}_3(\text{aq})$  solution to neutralize the reaction to about pH=7. It was then extracted with ethyl acetate (3 x 15 mL) and water. Finally, all organic layers were combined and removed with anhydrous sodium sulfate, filtered and

concentrated in vacuo. After concentration, the residue was purified by column chromatography (Hex/EA = 5/1) to obtain the product **6**.

**General procedure for the synthesis of (Z)-2-(3-(tert-butyl)-2-oxo-4-phenyl-2,3,4,5-tetrahydro-1H-benzo[d]azepin-1-ylidene)-3-oxo-3-phenylpropanenitrile (6')**:

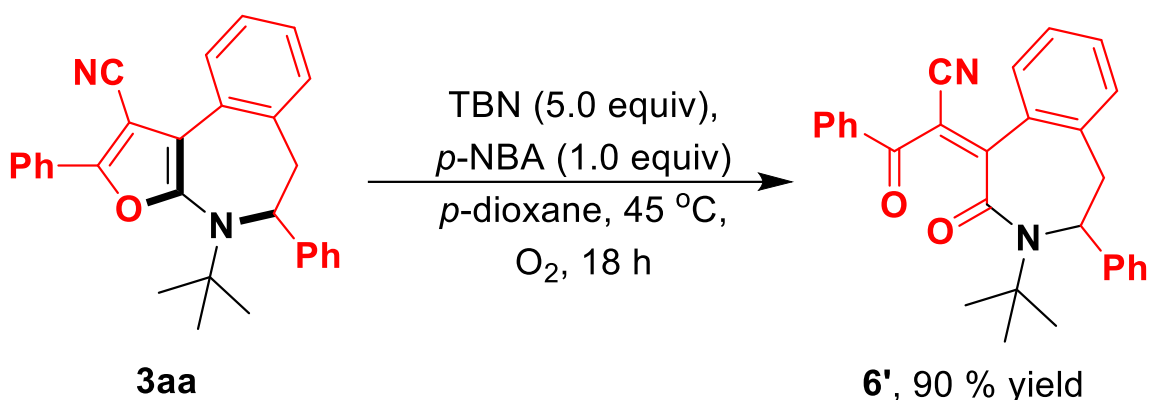

Prepare a clean 15 mL sealed tube with a magnetic stir bar. **3aa** (0.2 mmol), TBN (5.0 equiv), *p*-NBA (1.0 equiv), and *p*-dioxane (3.0 mL) were added to the bottle in sequence. The tube was then filled with oxygen and then heated to about 45 °C and the reaction was monitored by TLC. After the reaction was completed, cooled to room temperature and then added  $\text{Na}_2\text{CO}_{3(\text{aq})}$  solution to neutralize the reaction to about pH=7. It was then extracted with ethyl acetate (3 x 15 mL) and ater. Finally, all organic layers were combined and removed with anhydrous sodium sulfate, filtered and concentrated in vacuo. After concentration, the residue was purified by column chromatography (Hex/EA = 9/1) to obtain the product **6'**.

**(f) General procedure for the synthesis of (E)-4-(tert-butyl)-2-(3-(styryl/vinyl)phenyl)-5-phenyl-5,6-dihydro-4H-benzo[d]furo[2,3-b]azepine-1-carbonitrile (7a and 7b):**

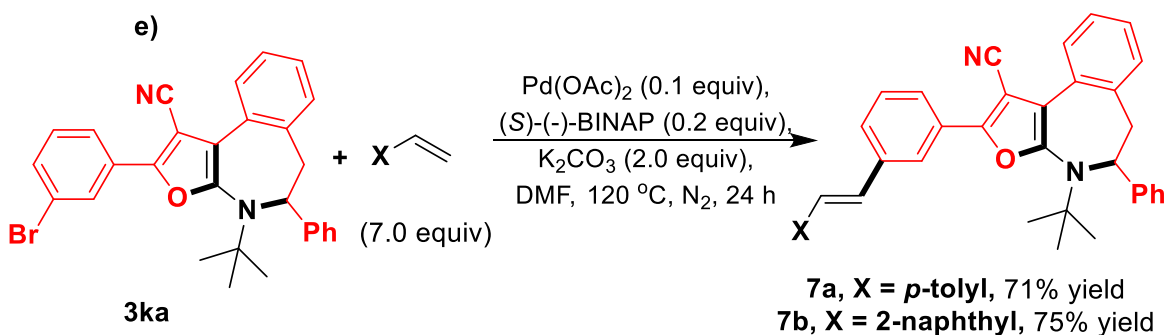

First, **3ka** (1.0 equiv, 0.1 mmol),  $\text{Pd(OAc)}_2$  (0.1 equiv), and (*S*)-(-)-BINAP (0.2 equiv) were added to a 25 mL round-bottomed flask, respectively, followed by nitrogen. The round bottom flask was filled with nitrogen. Next,

5 mL of DMF was added as a solvent, then  $K_2CO_3$  (2.0 equiv) was added. After waiting for the reaction to react at room temperature for 10 minutes, then respective alkenes (7.0 equiv) was slowly added. Heating to 120 °C and was monitored by TLC. After the reaction was completed, the reaction was cooled to room temperature, and secondary water was added, followed by extraction with ethyl acetate and water. After 2~3 times in total, all organic layers were combined and removed with anhydrous sodium sulfate. The water was concentrated by a vacuum concentrator to obtain the crude product, and then further purified by column chromatography (Hex/EA = 50/1) to obtain the compound **7a/7b**.

(e) General procedure for the synthesis of 13-(*tert*-butyl)-12-phenyl-5,11,12,13-tetrahydro-6*H*-benzo[4',5']azepino[3',2':4,5]furo[3,2-*c*]quinolin-6-one (**9**)

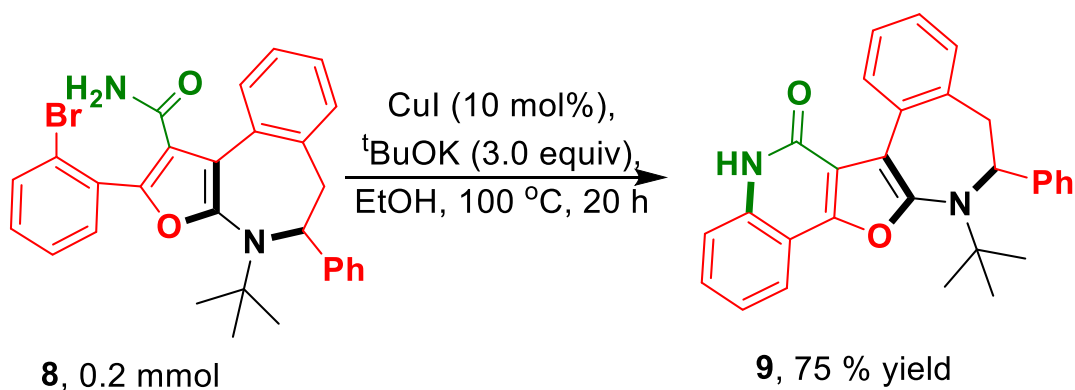

Prepare a clean 15 mL sealed tube with a magnetic stir bar. To the bottle was added **8** (0.1 mmol),  $t$ -BuOK (3.0 equiv), and the solvent ethanol (2.0 mL). Later, CuI (10 mol%) was added and heated to 100 °C, and the reaction was monitored by TLC. After the reaction was completed, water was added to stop the reaction, followed by extraction with ethyl acetate (3×15 mL) and water. Finally, all organic layers were combined and removed with anhydrous sodium sulfate, filtered and concentrated in vacuo. After concentration, the residue was purified by column chromatography (Hex/EA = 19/1) to obtain the product **9**.

## 4. Control Studies (Scheme S2)

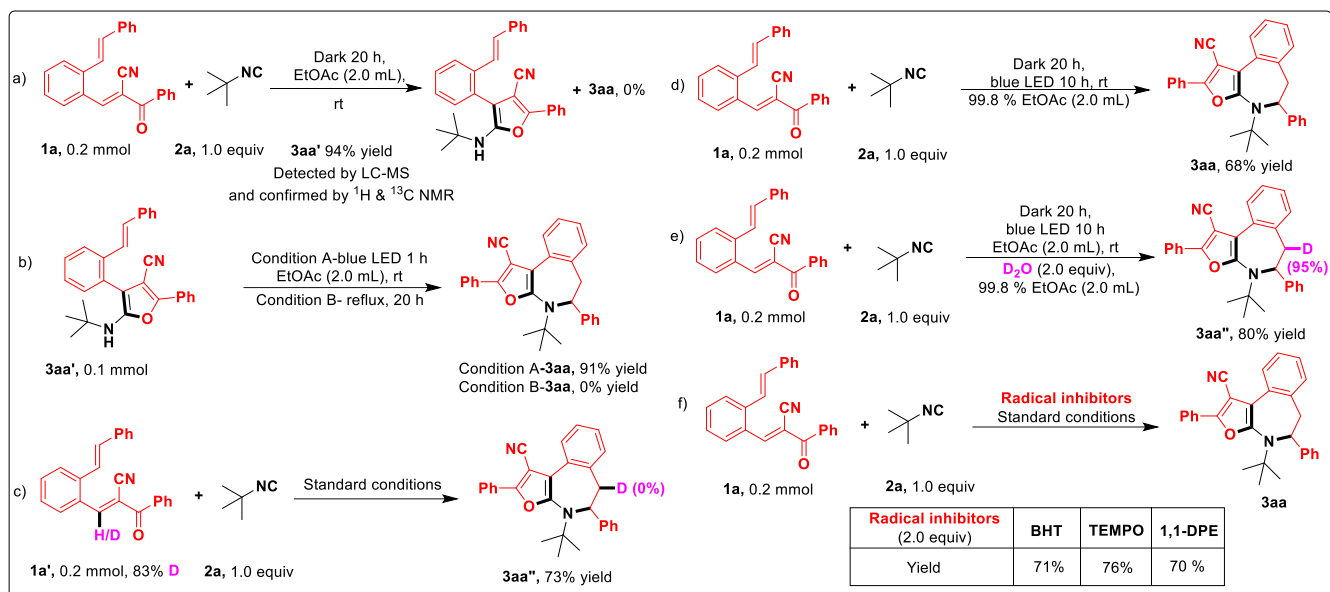

## 5. Fluorescence Quenching Study

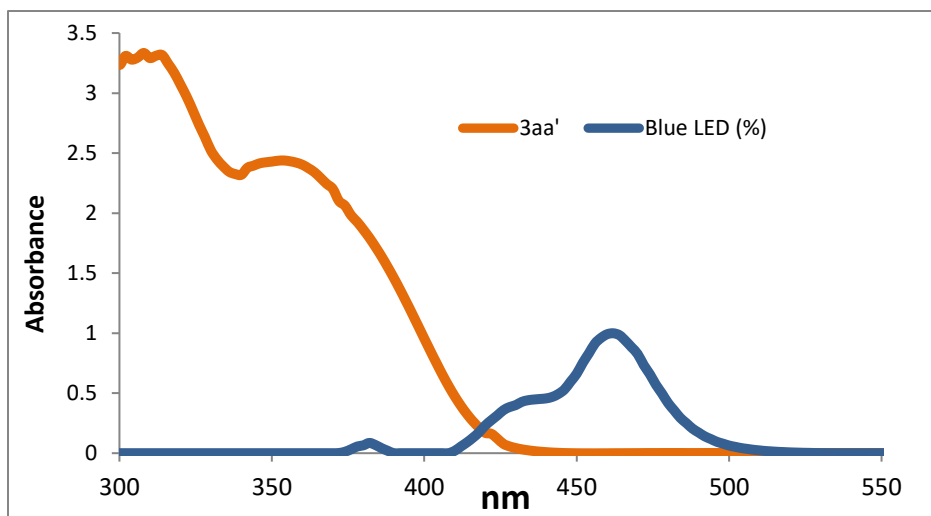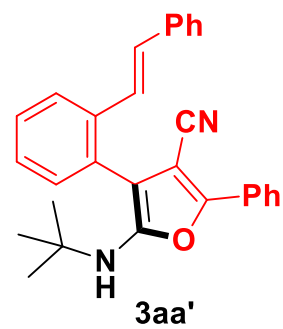



## 6. Light on-off study

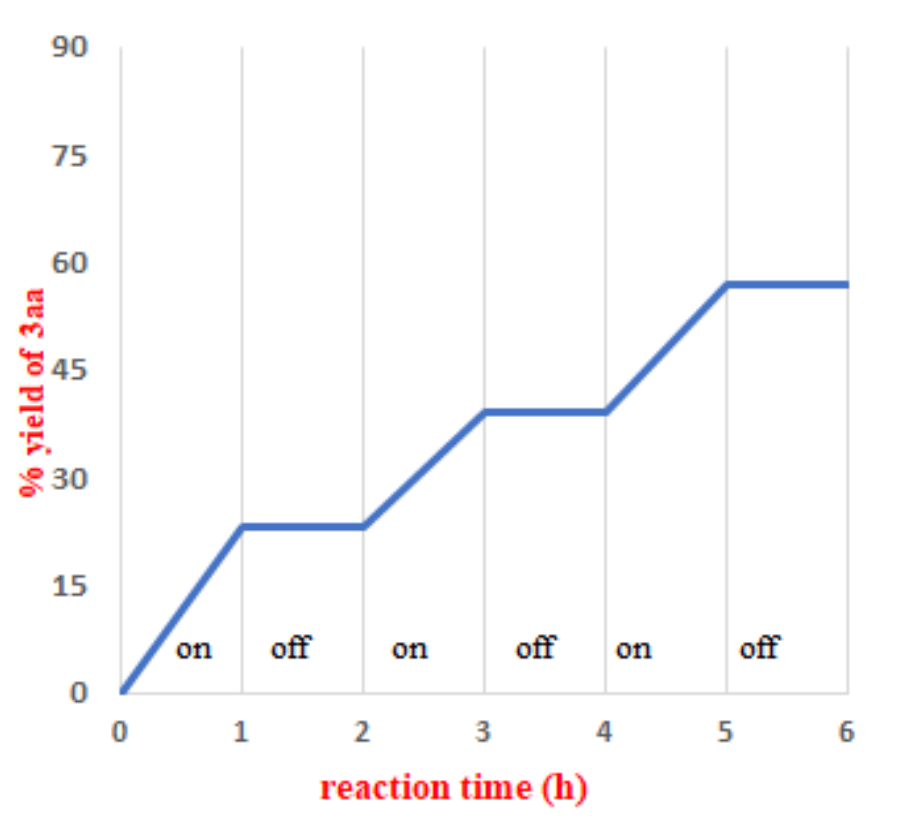

## 7. Spectral Characterization

**(E)-2-(3-bromobenzoyl)-3-(2-((E)-styryl)phenyl)acrylonitrile (1l):** A reaction tube was charged with **S1a**

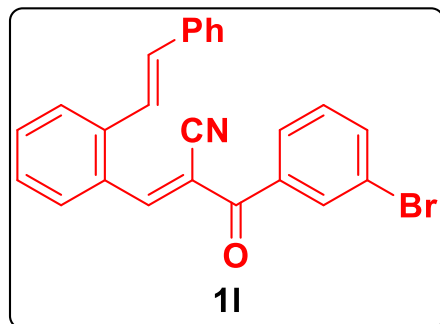

(1.0 equiv), **S2c** (1.5 equiv), AcOH (20 mol%) and piperidine (20 mol%) in 5.0 mL of toluene. The reaction suspension was stirred at room temperature, and the progress of the reaction was monitored by TLC. Upon completion, water was added to quench the reaction mixture, which was then extracted with ethyl acetate (3×15 mL). Finally, the combined organic layer was dried over sodium sulfate, filtered, and concentrated under vacuum. The residue was purified by column chromatography on

silica gel to afford the corresponding **1l**. <sup>1</sup>H NMR (400 MHz, CDCl<sub>3</sub>): δ 8.47 (d, *J* = 2.2 Hz, 1H), 8.20 (t, *J* = 5.5 Hz, 1H), 8.02 (d, *J* = 1.8 Hz, 1H), 7.81 (ddd, *J* = 9.0, 5.0, 3.5 Hz, 1H), 7.75 – 7.69 (m, 1H), 7.65 (t, *J* = 5.5 Hz, 1H), 7.55 (dd, *J* = 15.0, 7.3 Hz, 1H), 7.52 – 7.36 (m, 5H), 7.35 – 7.28 (m, 2H), 7.28 – 7.20 (m, 1H), 6.90 (dd, *J* = 16.0, 2.4 Hz, 1H); <sup>13</sup>C NMR (101 MHz, CDCl<sub>3</sub>): δ 187.55, 154.93, 139.91, 137.57, 136.35, 136.22, 135.65, 132.91, 132.03, 130.10, 129.71, 129.02, 128.85, 128.69, 127.98, 127.77, 127.64, 126.90, 124.56, 123.03, 116.25, 111.57; Yield: 73 % (301.5 mg), yellow solid, m.p. 112 – 114 °C. HRMS (ESI) *m/z*: (M+H)<sup>+</sup> Calcd. for C<sub>24</sub>H<sub>17</sub>BrNO 414.0494; found 414.0498.

**(E)-2-(2-bromobenzoyl)-3-(2-((E)-styryl)phenyl)acrylonitrile (1m):** A reaction tube was charged with **S1a**

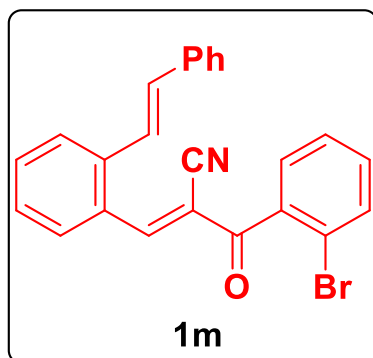

(1.0 equiv), **S2b** (1.5 equiv), AcOH (20 mol%) and piperidine (20 mol%) in 5.0 mL of toluene. The reaction suspension was stirred at room temperature, and the progress of the reaction was monitored by TLC. Upon completion, water was added to quench the reaction mixture, which was then extracted with ethyl acetate (3×15 mL). Finally, the combined organic layer was dried over sodium sulfate, filtered, and concentrated under vacuum. The residue was purified by column chromatography on silica gel to afford the corresponding **1m**. <sup>1</sup>H NMR

(400 MHz, CDCl<sub>3</sub>): δ 8.29 – 8.21 (m, 2H), 7.64 – 7.51 (m, 1H), 7.59 – 7.50 (m, 2H), 7.47 – 7.38 (m, 5H), 7.46 – 7.26 (m, 1H), 7.37 – 7.25 (m, 4H), 7.15 (dd, *J* = 16.0, 2.1 Hz, 1H), 7.15 (dd, *J* = 16.0, 2.1 Hz, 1H), 6.78 (dd, *J* = 16.0, 2.1 Hz, 1H); <sup>13</sup>C NMR (101 MHz, CDCl<sub>3</sub>): δ 190.35, 155.23, 140.22, 138.69, 136.35, 136.03, 133.25, 133.09, 132.01, 129.45, 129.09, 128.75, 128.67, 128.01, 127.95, 127.62, 126.85, 124.65, 119.16, 115.21, 112.85; Yield: 72 % (297.4 mg), yellow solid, m.p. 132 – 134 °C; HRMS (ESI) *m/z*: (M+H)<sup>+</sup> Calcd. for C<sub>24</sub>H<sub>17</sub>BrNO 414.0494; found 414.0491.

**(E)-2-(1-methyl-1H-indole-3-carbonyl)-3-(2-((E)-styryl)phenyl)acrylonitrile (1p):** A reaction tube was

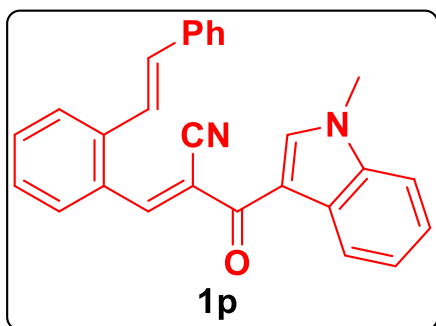

charged with **S1a** (1.0 equiv), **S2g** (1.5 equiv), AcOH (20 mol%) and piperidine (20 mol%) in 5.0 mL of toluene. The reaction suspension was stirred at room temperature, and the progress of the reaction was monitored by TLC. Upon completion, water was added to quench the reaction mixture, which was then extracted with ethyl acetate (3×15 mL). Finally, the combined organic layer was dried over sodium sulfate, filtered, and concentrated under vacuum. The residue was purified by column

chromatography on silica gel to afford the corresponding (*E*)-2-aryl-3-(2-((*E*)-styryl)aryl/alkyl)acrylonitrile derivatives **1p**. <sup>1</sup>H NMR (400 MHz, CDCl<sub>3</sub>): δ 8.69 (s, 1H), 8.49 – 8.43 (m, 1H), 8.34 (s, 1H), 8.12 – 8.06 (m, 1H), 7.69 – 7.65 (m, 1H), 7.56 – 7.46 (m, 3H), 7.42 (td, *J* = 7.6, 1.3 Hz, 1H), 7.38 – 7.35 (m, 4H), 7.33 (s, 1H), 7.31 – 7.24 (m, 2H), 6.98 (d, *J* = 16.0 Hz, 1H), 3.82 (s, 3H). <sup>13</sup>C NMR (101 MHz, CDCl<sub>3</sub>): δ 178.77, 152.76, 139.02, 137.22, 137.01, 136.62, 134.39, 131.79, 130.72, 128.88, 128.76, 128.40, 127.77, 127.44, 127.24, 126.91, 124.97, 124.11, 123.37, 122.95, 118.58, 114.16, 112.71, 109.87, 33.79; Yield: 68 % (263.9 mg), yellow solid, m.p. 150 – 152 °C; HRMS (ESI) *m/z*: (M+H)<sup>+</sup> Calcd. for C<sub>27</sub>H<sub>21</sub>N<sub>2</sub>O 389.1654; found 389.1651.

**(E)-2-benzoyl-3-(2-((E)-styryl)phenyl)acrylonitrile-*d* (1a')**: A reaction tube was charged with **S1a'** (1.0

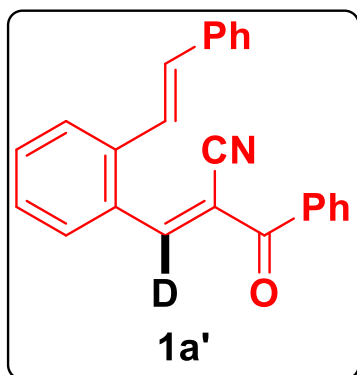

equiv), **S2a** (1.5 equiv), AcOH (20 mol%) and piperidine (20 mol%) in 5.0 mL of toluene. The reaction suspension was stirred at room temperature, and the progress of the reaction was monitored by TLC. Upon completion, water was added to quench the reaction mixture, which was then extracted with ethyl acetate (3×15 mL). Finally, the combined organic layer was dried over sodium sulfate, filtered, and concentrated under vacuum. The residue was purified by column chromatography on silica gel to afford the corresponding **1a'**. <sup>1</sup>H NMR

(400 MHz, CDCl<sub>3</sub>): δ 8.47 (s, 1H), 8.21 (dd, *J* = 7.9, 1.2 Hz, 1H), 7.93 – 7.88 (m, 2H), 7.95 – 7.87 (m, 2H), 7.69 – 7.64 (m, 1H), 7.68 – 7.53 (m, 4H), 7.63 – 7.58 (m, 1H), 7.55 (td, *J* = 7.6, 1.3 Hz, 1H), 7.51 – 7.44 (m, 6H), 7.43 – 7.30 (m, 3H), 7.25 (t, *J* = 8.0 Hz, 1H), 6.92 (d, *J* = 16.0 Hz, 1H); <sup>13</sup>C NMR (101 MHz, CDCl<sub>3</sub>): δ 189.01, 154.55, 139.67, 136.46, 135.81, 135.38, 133.39, 132.62, 132.59, 129.88, 129.27, 129.00, 128.83, 128.69, 128.63, 127.97, 127.65, 126.87, 124.74, 124.72, 116.46, 112.20; Yield: 76% (255.5 mg), yellow solid, m.p. 131 – 133 °C; HRMS (ESI) *m/z*: (M+H)<sup>+</sup> Calcd. for C<sub>24</sub>H<sub>17</sub>DNO 337.1451; found 337.1454.

**4-(tert-butyl)-2,5-diphenyl-5,6-dihydro-4H-benzo[d]furo[2,3-b]azepine-1-carbonitrile (3aa):** The residue

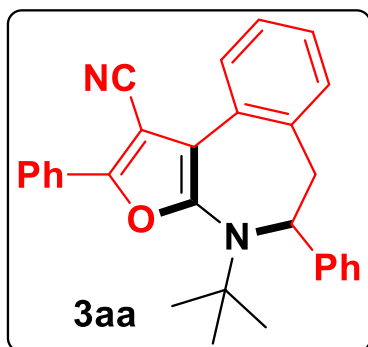

was purified by column chromatography (Hex/EA = 99/1) on silica gel.  $^1\text{H}$  NMR (400 MHz,  $\text{CDCl}_3$ ):  $\delta$  8.08 (d,  $J = 7.7$  Hz, 2H), 7.63 (d,  $J = 7.6$  Hz, 2H), 7.55 – 7.50 (m, 2H), 7.49 – 7.39 (m, 4H), 7.32 – 7.21 (m, 1H), 5.02 (d,  $J = 12.1$  Hz, 1H), 3.00 (dd,  $J = 14.3, 12.3$  Hz, 1H), 2.78 (dd,  $J = 14.3, 3.9$  Hz, 1H), 0.97 (s, 9H);  $^{13}\text{C}$  NMR (101 MHz,  $\text{CDCl}_3$ )  $\delta$  154.70, 154.53, 146.97, 138.37, 131.13, 129.50, 129.29, 129.05, 128.80, 128.49, 127.70, 127.59, 126.80, 126.32, 125.83, 125.11, 116.18, 115.09, 91.02, 71.03, 58.96, 44.31, 28.93; Yield: 90% (75.2

mg), white solid, m.p. 171-173 °C; HRMS (ESI)  $m/z$ : ( $\text{M}+\text{H}$ ) $^+$  Calcd. for  $\text{C}_{29}\text{H}_{27}\text{N}_2\text{O}$  419.2123; found 419.2119.

**4-(tert-butyl)-2,5-diphenyl-5,6-dihydro-4H-[1,3]dioxolo[4',5':4,5]benzo[1,2-d]furo[2,3-b]azepine-1-**

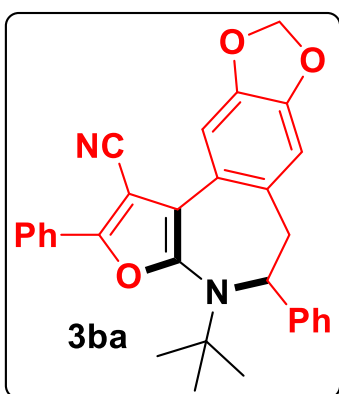

**carbonitrile (3ba):** The residue was purified by column chromatography (Hex/EA = 99/1) on silica gel.  $^1\text{H}$  NMR (400 MHz,  $\text{CDCl}_3$ ):  $\delta$  8.11 – 8.03 (m, 1H), 7.52 (ddd,  $J = 8.4, 5.6, 2.0$  Hz, 2H), 7.46 – 7.40 (m, 3H), 7.38 – 7.32 (m, 2H), 7.24 (d,  $J = 1.9$  Hz, 1H), 7.11 (s, 1H), 6.81 (s, 1H), 6.00 (dd,  $J = 17.8, 1.4$  Hz, 1H), 4.97 (dd,  $J = 12.2, 3.7$  Hz, 1H), 2.90 (dd,  $J = 14.4, 12.3$  Hz, 1H), 2.65 (dd,  $J = 14.5, 3.8$  Hz, 1H), 0.98 (s, 9H);  $^{13}\text{C}$  NMR (101 MHz,  $\text{CDCl}_3$ ):  $\delta$  154.64, 154.50, 147.06, 146.82, 132.36, 129.50, 129.04, 129.01, 128.49, 126.81, 125.82, 125.10, 124.34, 116.50, 115.06, 109.77, 106.91, 101.21, 90.94, 71.43, 58.81, 44.16, 28.97; Yield: 81%

(75.0 mg), pale yellow solid, m.p. 263-265 °C; HRMS (ESI)  $m/z$ : ( $\text{M}+\text{H}$ ) $^+$  Calcd. for  $\text{C}_{30}\text{H}_{27}\text{N}_2\text{O}_3$  463.2022; found 463.2016.

**4-(tert-butyl)-9-methoxy-2,5-diphenyl-5,6-dihydro-4H-benzo[d]furo[2,3-b]azepine-1-carbonitrile (3ca):**

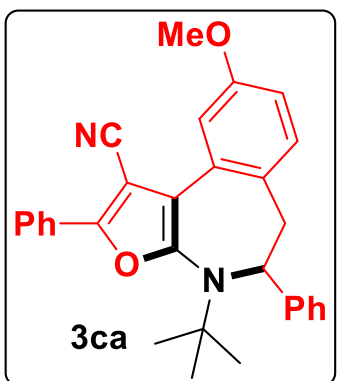

The residue was purified by column chromatography (Hex/EA = 99/1) on silica gel.  $^1\text{H}$  NMR (597 MHz,  $\text{CDCl}_3$ ):  $\delta$  8.11 – 8.04 (m, 2H), 7.56 (d,  $J = 8.4$  Hz, 1H), 7.54 – 7.49 (m, 2H), 7.47 (dd,  $J = 8.2, 1.4$  Hz, 2H), 7.45 – 7.41 (m, 1H), 7.38 – 7.32 (m, 2H), 7.23 (dd,  $J = 5.0, 3.7$  Hz, 1H), 6.93 (dd,  $J = 8.4, 2.6$  Hz, 1H), 6.88 (d,  $J = 2.6$  Hz, 1H), 4.99 (dd,  $J = 12.4, 3.9$  Hz, 1H), 3.86 (s, 3H), 2.96 (dd,  $J = 14.4, 12.4$  Hz, 1H), 2.72 (dd,  $J = 14.4, 3.9$  Hz, 1H), 0.96 (s, 9H);  $^{13}\text{C}$  NMR (150 MHz,  $\text{CDCl}_3$ ):  $\delta$  159.14, 154.55, 154.15, 147.05, 139.99, 129.42, 129.04, 128.91, 128.49, 127.47, 126.79, 125.85, 125.09, 123.52, 116.40, 115.47, 115.20, 112.41, 91.09, 70.62,

58.90, 55.34, 44.51, 28.91; Yield: 82% (73.5 mg), white solid, m.p. 226-228 °C. HRMS (EI)  $m/z$ : ( $\text{M}$ ) $^+$  Calcd. for  $\text{C}_{30}\text{H}_{28}\text{N}_2\text{O}_2$  448.2151; found 448.2152.

**4-(tert-butyl)-8-methyl-2,5-diphenyl-5,6-dihydro-4H-benzo[d]furo[2,3-b]azepine-1-carbonitrile (3da):** The

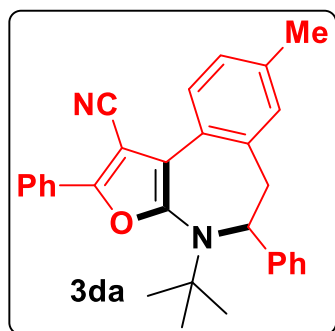

residue was purified by column chromatography (Hex/EA = 99/1) on silica gel.  $^1\text{H}$  NMR (597 MHz,  $\text{CDCl}_3$ ):  $\delta$  8.13 – 8.04 (m, 2H), 7.55 – 7.49 (m, 2H), 7.48 (dd,  $J$  = 5.2, 3.1 Hz, 2H), 7.45 – 7.43 (m, 1H), 7.36 (dd,  $J$  = 9.2, 6.3 Hz, 2H), 7.27 – 7.22 (m, 1H), 7.20 (dd,  $J$  = 7.7, 1.7 Hz, 1H), 7.14 (d,  $J$  = 1.8 Hz, 1H), 4.99 (dd,  $J$  = 12.4, 3.9 Hz, 1H), 2.96 (dd,  $J$  = 14.4, 12.5 Hz, 1H), 2.72 (dd,  $J$  = 14.4, 3.9 Hz, 1H), 2.39 (s, 2H), 2.39 (s, 3H), 0.97 (s, 10H);  $^{13}\text{C}$  NMR (150 MHz,  $\text{CDCl}_3$ ):  $\delta$  154.59, 154.43, 147.15, 138.32, 137.55, 130.11, 129.42, 129.04, 128.91, 128.49, 128.26, 126.91,

126.77, 126.17, 125.85, 125.10, 116.45, 115.14, 91.11, 58.95, 44.35, 28.95, 21.34; Yield: 84% (72.7 mg), white solid, m.p. 176 – 178 °C; HRMS (EI)  $m/z$ : ( $\text{M}$ )<sup>+</sup> Calcd. for  $\text{C}_{30}\text{H}_{28}\text{N}_2\text{O}$  432.2202; found 432.2207.

**4-(tert-butyl)-9-fluoro-2,5-diphenyl-5,6-dihydro-4H-benzo[d]furo[2,3-b]azepine-1-carbonitrile (3ea):** The

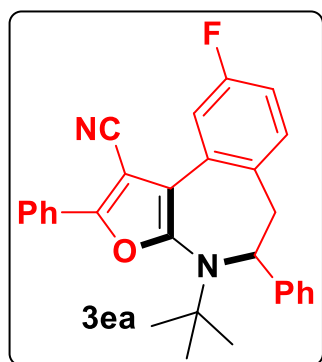

residue was purified by column chromatography (Hex/EA = 99/1) on silica gel to get R/S = 52:48 isomer mixture.  $^1\text{H}$  NMR (597 MHz,  $\text{CDCl}_3$ ):  $\delta$  8.11 – 8.04 (m, 2H), 7.59 (dd,  $J$  = 8.4, 5.5 Hz, 1H), 7.56 – 7.49 (m, 2H), 7.47 – 7.41 (m, 3H), 7.37 – 7.33 (m, 2H), 7.28 – 7.22 (m, 1H), 7.09 (td,  $J$  = 8.5, 2.6 Hz, 1H), 7.05 (s, 1H), 6.96 (td,  $J$  = 8.4, 2.6 Hz, 1H), 5.01 (ddd,  $J$  = 12.4, 8.9, 3.9 Hz, 1H), 2.98 (dd,  $J$  = 12.1, 10.3 Hz, 1H), 2.81 – 2.76 (m, 1H), 2.76 – 2.71 (m, 1H), 0.98 (s, 9H);  $^{13}\text{C}$  NMR (150 MHz,  $\text{CDCl}_3$ ):  $\delta$  162.17 (d,  $J_{\text{C-F}}$  = 245.6 Hz), 161.99 (d,  $J_{\text{C-F}}$  = 247.2 Hz), 154.80, 154.36,

146.60, 146.56, 140.74, 140.69, 134.03 (d,  $J_{\text{C-F}}$  = 3.0 Hz), 133.00, 132.94, 130.69 (d,  $J_{\text{C-F}}$  = 8.6 Hz), 129.63 (d,  $J_{\text{C-F}}$  = 7.1 Hz), 129.10, 129.09, 128.71, 128.61, 128.57, 128.54, 127.90 (d,  $J_{\text{C-F}}$  = 8.6 Hz), 127.18 (d,  $J_{\text{C-F}}$  = 2.9 Hz), 126.95 (d,  $J_{\text{C-F}}$  = 7.4 Hz), 125.79, 125.78, 125.12, 125.11, 116.38 (d,  $J_{\text{C-F}}$  = 21.6 Hz), 115.39, 115.02, 115.00, 114.95, 114.70, 114.35 (d,  $J_{\text{C-F}}$  = 24.8 Hz), 114.49 (d,  $J_{\text{C-F}}$  = 25.1 Hz), 113.25 (d,  $J_{\text{C-F}}$  = 22.7 Hz), 90.94, 90.83, 71.00, 70.68, 59.07, 58.98, 44.17, 43.50, 28.99, 28.94; Yield: 77% (67.2 mg), white solid, m.p. 203 – 205 °C; HRMS (EI)  $m/z$ : ( $\text{M}$ )<sup>+</sup> Calcd. for  $\text{C}_{29}\text{H}_{25}\text{FN}_2\text{O}$  436.1951; found 436.1953.

**3-(tert-butyl)-2,5-diphenyl-2,3-dihydro-1H-furo[2,3-b]naphtho[2,1-d]azepine-6-carbonitrile (3fa):** The

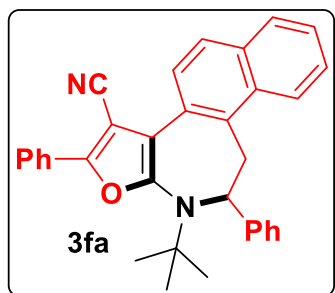

residue was purified by column chromatography (Hex/EA = 99/1) on silica gel.  $^1\text{H}$  NMR (400 MHz,  $\text{CDCl}_3$ ):  $\delta$  8.15 – 8.08 (m, 2H), 7.93 – 7.79 (m, 4H), 7.69 – 7.59 (m, 2H), 7.58 – 7.38 (m, 6H), 7.37 – 7.26 (m, 2H), 5.19 (dd,  $J$  = 11.7, 3.6 Hz, 1H), 3.09 (dd,  $J$  = 14.3, 12.3 Hz, 1H), 2.85 (dd,  $J$  = 14.4, 3.9 Hz, 1H), 0.99 (s, 9H);  $^{13}\text{C}$  NMR (101 MHz,  $\text{CDCl}_3$ ):  $\delta$  154.76, 154.56, 144.44, 138.34, 133.44, 132.64, 131.14, 129.53, 129.34, 129.10, 128.84, 128.39, 127.85, 127.75, 127.72, 127.65,

126.37, 126.10, 125.60, 125.12, 124.48, 124.16, 116.23, 115.08, 91.09, 71.21, 59.09, 44.22, 28.99; Yield: 74% (69.3 mg), pale yellow solid, m.p. 195 – 197 °C; HRMS (EI) m/z: (M)<sup>+</sup> Calcd. for C<sub>33</sub>H<sub>28</sub>N<sub>2</sub>O 468.2202; found 468.2203.

**6-(*tert*-butyl)-5,8-diphenyl-5,6-dihydro-4*H*-furo[2,3-*b*]thieno[2,3-*d*]azepine-9-carbonitrile (3ga):** The

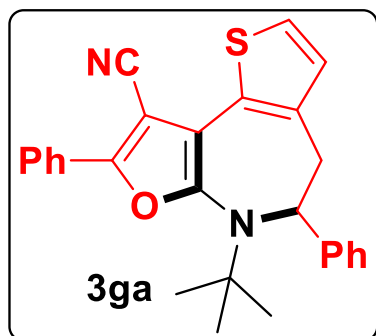

residue was purified by column chromatography (Hex/EA = 99/1) on silica gel.

<sup>1</sup>H NMR (400 MHz, CDCl<sub>3</sub>): δ 7.97 (s, 1H), 7.50 – 7.44 (m, 1H), 7.39 (s, 1H), 7.27 (s, 1H), 7.23 – 7.16 (m, 1H), 7.12 (dd, *J* = 8.5, 5.8 Hz, 1H), 6.98 (dd, *J* = 5.1, 1.4 Hz, 1H), 5.20 – 5.11 (m, 1H), 3.56 (ddd, *J* = 16.4, 6.6, 1.7 Hz, 1H), 3.21 – 3.12 (m, 1H), 1.37 (d, *J* = 1.3 Hz, 9H); <sup>13</sup>C NMR (101 MHz, CDCl<sub>3</sub>): δ 153.64, 152.46, 142.63, 135.56, 129.30, 129.24, 128.98, 128.53, 128.18, 127.96, 126.67, 126.30, 124.87, 122.98, 115.46, 59.61, 58.61, 36.51, 29.60;

Yield: 78% (66.3 mg), dark brown solid, m.p. 132 – 134 °C; HRMS (ESI) m/z: (M+H)<sup>+</sup> Calcd. for C<sub>27</sub>H<sub>25</sub>N<sub>2</sub>OS 425.1688; found 425.1683.

**4-(*tert*-butyl)-2-(4-(*tert*-butyl)phenyl)-5-phenyl-5,6-dihydro-4*H*-benzo[*d*]furo[2,3-*b*]azepine-1-carbonitrile (3ha):** The residue was purified by column chromatography (Hex/EA =

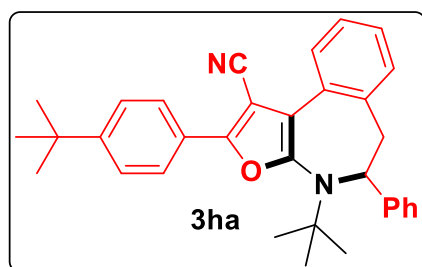

99/1) on silica gel. <sup>1</sup>H NMR (400 MHz, CDCl<sub>3</sub>): δ 8.02 (d, *J* = 8.7 Hz, 2H), 7.62 (d, *J* = 0.9 Hz, 1H), 7.55 (d, *J* = 8.7 Hz, 2H), 7.49 – 7.44 (m, 2H), 7.36 (dd, *J* = 13.8, 6.6 Hz, 3H), 7.27 (ddd, *J* = 12.1, 7.9, 2.8 Hz, 3H), 5.01 (dd, *J* = 12.3, 3.9 Hz, 1H), 2.99 (dd, *J* = 14.2, 12.5 Hz, 1H), 2.77 (dd, *J* = 14.3, 3.9 Hz, 1H), 1.38 (s, 9H), 0.96 (s, 9H); δ <sup>13</sup>C NMR (101 MHz,

CDCl<sub>3</sub>) δ 155.08, 154.23, 152.95, 147.03, 138.37, 131.26, 129.81, 129.27, 128.47, 127.61, 127.56, 126.77, 126.32, 126.09, 125.99, 125.83, 124.97, 116.09, 115.23, 90.34, 71.04, 58.91, 44.35, 34.91, 31.17, 29.69, 29.65, 28.90; Yield: 86% (81.52 mg), pale yellow solid, m.p. 42 – 44 °C; HRMS (ESI) m/z: (M+H)<sup>+</sup> Calcd. for C<sub>33</sub>H<sub>35</sub>N<sub>2</sub>OS 475.6480; found 475.6484.

**4-(*tert*-butyl)-5-phenyl-2-(*p*-tolyl)-5,6-dihydro-4*H*-benzo[*d*]furo[2,3-*b*]azepine-1-carbonitrile (3ia):** The

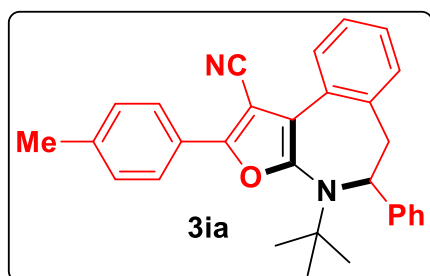

residue was purified by column chromatography (Hex/EA = 99/1) on silica gel. <sup>1</sup>H NMR (400 MHz, CDCl<sub>3</sub>): δ 7.97 (d, *J* = 8.0 Hz, 2H), 7.63 (d, *J* = 7.6 Hz, 1H), 7.47 (dd, *J* = 8.2, 1.4 Hz, 2H), 7.42 – 7.21 (m, 8H), 5.01 (dd, *J* = 12.3, 3.8 Hz, 1H), 2.99 (dd, *J* = 14.3, 12.3 Hz, 1H), 2.77 (dd, *J* = 14.3, 3.9 Hz, 1H), 2.44 (s, 3H), 0.95 (s, 9H); <sup>13</sup>C NMR (101 MHz, CDCl<sub>3</sub>): δ 155.16, 154.21, 147.06, 139.84, 138.40, 131.26, 129.72, 129.28, 128.48, 127.64,

127.58, 126.78, 126.32, 126.15, 125.85, 125.12, 116.14, 115.25, 90.23, 71.04, 58.94, 44.34, 28.89, 21.52; Yield: 85% (73.4 mg), white solid, m.p. 183 – 185 °C; HRMS (EI) m/z: (M)<sup>+</sup> Calcd. for C<sub>30</sub>H<sub>28</sub>N<sub>2</sub>O 432.2202; found 432.2201.

**4-(*tert*-butyl)-5-phenyl-2-(*m*-tolyl)-5,6-dihydro-4*H*-benzo[*d*]furo[2,3-*b*]azepine-1-carbonitrile (3ja):** The

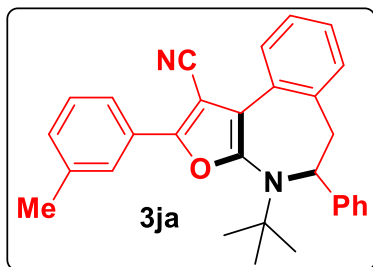

residue was purified by column chromatography (Hex/EA = 99/1) on silica gel.

<sup>1</sup>H NMR (400 MHz, CDCl<sub>3</sub>): δ 7.92 – 7.85 (m, 2H), 7.63 (d, *J* = 7.4 Hz, 1H), 7.47 (d, *J* = 7.3 Hz, 2H), 7.44 – 7.34 (m, 4H), 7.33 – 7.23 (m, 4H), 5.01 (dd, *J* = 12.3, 3.8 Hz, 1H), 3.07 – 2.94 (m, 1H), 2.78 (dd, *J* = 14.4, 3.9 Hz, 1H), 2.47 (s, 3H), 0.96 (s, 9H); <sup>13</sup>C NMR (101 MHz, CDCl<sub>3</sub>) δ 154.94, 154.42, 147.01, 138.82, 138.36, 131.17, 130.37, 129.27, 128.95, 128.73, 128.47, 127.66, 127.58,

126.78, 126.32, 125.83, 125.57, 122.38, 116.24, 115.12, 90.84, 77.31, 76.99, 76.68, 71.03, 58.98, 44.32, 28.90, 21.59; ; Yield: 82% (70.80 mg), white solid, m.p. 174 – 176 °C; HRMS (EI) m/z: (M)<sup>+</sup> Calcd. for C<sub>30</sub>H<sub>28</sub>N<sub>2</sub>O 432.2202; found 432.2201.

**2-(3-bromophenyl)-4-(*tert*-butyl)-5-phenyl-5,6-dihydro-4*H*-benzo[*d*]furo[2,3-*b*]azepine-1-carbonitrile**

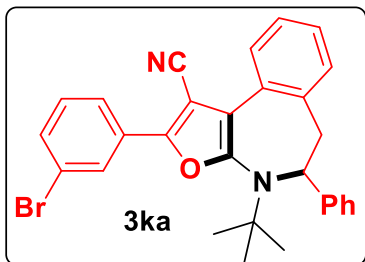

**(3ka):** The residue was purified by column chromatography (Hex/EA = 99/1) on silica gel. <sup>1</sup>H NMR (400 MHz, CDCl<sub>3</sub>): δ 8.13 (d, *J* = 1.9 Hz, 1H), 7.62 (t, *J* = 4.1 Hz, 1H), 7.59 – 7.52 (m, 1H), 7.45 (ddd, *J* = 6.1, 1.5, 0.6 Hz, 1H), 7.39 (tt, *J* = 13.2, 4.3 Hz, 1H), 7.33 – 7.21 (m, 3H), 5.02 (dd, *J* = 12.3, 3.8 Hz, 1H), 2.99 (dd, *J* = 14.4, 12.4 Hz, 1H), 2.79 (dd, *J* = 14.4, 3.9 Hz, 1H), 0.97 (s, 9H); <sup>13</sup>C NMR (101 MHz, CDCl<sub>3</sub>): δ 155.08, 152.67, 146.78, 138.30, 132.32, 130.79,

130.62, 130.58, 129.33, 128.54, 127.88, 127.80, 127.75, 127.66, 126.89, 126.31, 125.79, 123.54, 123.21, 116.37, 114.59, 92.16, 71.03, 59.14, 44.23, 28.95; Yield: 72% (71.5 mg), white solid, m.p. 202-204 °C; HRMS (ESI) m/z: (M+H)<sup>+</sup> Calcd. for C<sub>29</sub>H<sub>26</sub>BrN<sub>2</sub>O 497.1229; found 497.1226.

**2-(2-bromophenyl)-4-(*tert*-butyl)-5-phenyl-5,6-dihydro-4*H*-benzo[*d*]furo[2,3-*b*]azepine-1-carbonitrile**

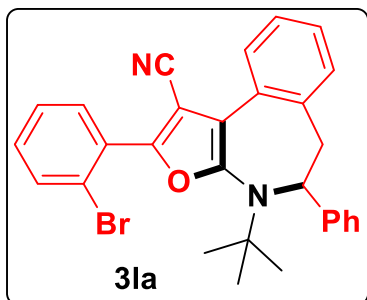

**(3la):** The residue was purified by column chromatography (Hex/EA = 99/1) on silica gel. <sup>1</sup>H NMR (400 MHz, CDCl<sub>3</sub>): δ 7.77 (dd, *J* = 8.1, 1.2 Hz, 1H), 7.72 (dd, *J* = 7.7, 1.7 Hz, 1H), 7.62 (dd, *J* = 7.3, 1.0 Hz, 1H), 7.52 – 7.45 (m, 3H), 7.42 – 7.35 (m, 2H), 7.35 – 7.20 (m, 4H), 5.05 (dd, *J* = 12.4, 4.0 Hz, 1H), 3.00 (dd, *J* = 14.3, 12.4 Hz, 1H), 2.79 (dd, *J* = 14.4, 4.1 Hz, 1H), 0.97 (s, 9H); <sup>13</sup>C NMR (101 MHz, CDCl<sub>3</sub>): δ 155.54, 154.69, 146.83, 138.45, 134.13, 131.70, 131.35, 131.17,

129.75, 129.32, 128.45, 127.78, 127.65, 127.61, 126.81, 126.42, 125.93, 122.10, 115.94, 114.02, 95.40, 71.27,



58.90, 44.27, 29.04; Yield: 68% (67.5 mg), white solid, m.p. 144-146 °C; HRMS (EI) m/z: (M)<sup>+</sup> Calcd. for C<sub>29</sub>H<sub>25</sub>BrN<sub>2</sub>O 496.1150; found 496.1146.

#### 4-(*tert*-butyl)-2-(4-chlorophenyl)-5-phenyl-5,6-dihydro-4*H*-benzo[*d*]furo[2,3-*b*]azepine-1-carbonitrile

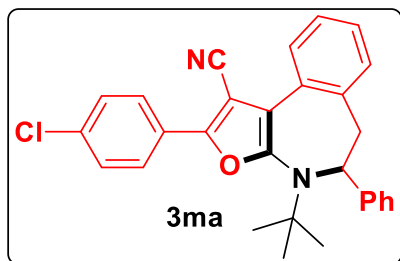

**(3ma):** The residue was purified by column chromatography (Hex/EA = 99/1) on silica gel. <sup>1</sup>H NMR (400 MHz, CDCl<sub>3</sub>): δ 8.05 – 7.97 (m, 1H), 7.62 (d, *J* = 7.6 Hz, 1H), 7.51 – 7.43 (m, 3H), 7.41 – 7.33 (m, 2H), 7.31 – 7.23 (m, 1H), 5.02 (dd, *J* = 12.3, 3.9 Hz, 1H), 2.99 (dd, *J* = 14.3, 12.3 Hz, 1H), 2.78 (dd, *J* = 14.4, 3.9 Hz, 1H), 0.96 (s, 9H); <sup>13</sup>C NMR (101 MHz, CDCl<sub>3</sub>): δ 154.79, 153.48, 146.84, 138.31, 135.35, 130.90, 129.34, 128.51, 127.83, 127.65,

127.24, 126.87, 126.28, 125.80, 116.23, 114.86, 91.45, 71.02, 59.06, 44.24, 28.93; Yield: 79% (71.6 mg), white solid, m.p. 204-206 °C; HRMS (ESI) m/z: (M+H)<sup>+</sup> Calcd. for C<sub>29</sub>H<sub>26</sub>ClN<sub>2</sub>O 453.1734; found 453.1727.

#### 4-(*tert*-butyl)-2-(4-fluorophenyl)-5-phenyl-5,6-dihydro-4*H*-benzo[*d*]furo[2,3-*b*]azepine-1-carbonitrile

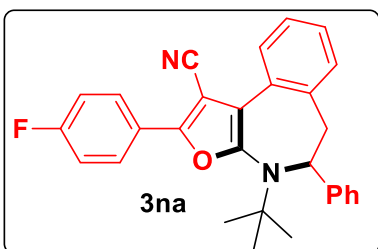

**(3na):** The residue was purified by column chromatography (Hex/EA = 99/1) on silica gel. <sup>1</sup>H NMR (400 MHz, CDCl<sub>3</sub>): δ 8.11 – 8.04 (m, 2H), 7.62 (dd, *J* = 7.4, 1.0 Hz, 1H), 7.48 – 7.44 (m, 2H), 7.42 – 7.33 (m, 4H), 7.30 (qd, *J* = 7.1, 1.2 Hz, 3H), 5.01 (dd, *J* = 12.3, 3.8 Hz, 1H), 2.99 (dd, *J* = 14.3, 12.4 Hz, 1H), 2.78 (dd, *J* = 14.3, 3.9 Hz, 1H), 0.96 (s, 9H); <sup>13</sup>C NMR (101 MHz, CDCl<sub>3</sub>): δ 163.24

(d, *J*<sub>C-F</sub> = 251.9 Hz), 154.56, 153.92, 146.94, 138.37, 131.02, 129.33, 128.51, 127.79, 127.64, 127.20 (d, *J*<sub>C-F</sub> = 8.4 Hz), 126.84, 126.30, 125.81, 125.20 (d, *J*<sub>C-F</sub> = 3.4 Hz), 116.27 (d, *J*<sub>C-F</sub> = 22.1 Hz), 116.22, 115.03, 90.78, 71.05, 59.03, 44.29, 28.91; Yield: 73% (63.9 mg), white solid, m.p. 209-211 °C; HRMS (ESI) m/z: (M+H)<sup>+</sup> Calcd. for C<sub>29</sub>H<sub>26</sub>FN<sub>2</sub>O 437.2029; found 437.2026.

#### 4-(*tert*-butyl)-2-(1-methyl-1*H*-indol-3-yl)-5-phenyl-5,6-dihydro-4*H*-benzo[*d*]furo[2,3-*b*]azepine-1-carbonitrile

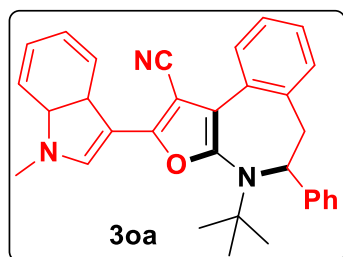

**(3oa):** The residue was purified by column chromatography (Hex/EA = 99/1) on silica gel. <sup>1</sup>H NMR (597 MHz, CDCl<sub>3</sub>): 8.32 (dd, *J* = 7.8, 1.2 Hz, 1H), 8.01 (s, 1H), 7.63 (dd, *J* = 7.6, 1.3 Hz, 1H), 7.55 (d, *J* = 7.4 Hz, 2H), 7.44 – 7.39 (m, 2H), 7.30 – 7.22 (m, 3H), 5.02 (dd, *J* = 12.5, 4.0 Hz, 1H), 3.91 (s, 3H), 3.02 (dd, *J* = 14.4, 12.5 Hz, 1H), 2.78 (dd, *J* = 14.4, 4.0 Hz, 1H), 0.97 (s, 9H); <sup>13</sup>C NMR (150 MHz, CDCl<sub>3</sub>): δ 155.17, 152.92, 147.37, 138.63, 136.80, 131.76,

129.30, 128.74, 128.49, 127.55, 127.51, 126.67, 126.34, 125.89, 125.13, 123.05, 121.43, 121.38, 116.17, 115.69, 109.83, 105.61, 86.51, 71.24, 59.19, 44.49, 33.38, 28.82; Yield: 78% (73.5 mg), white solid, m.p. 175-177 °C; HRMS (EI) m/z: (M)<sup>+</sup> Calcd. for C<sub>32</sub>H<sub>29</sub>N<sub>3</sub>O 471.2311; found 471.2311.



#### 4-(*tert*-butyl)-5-(4-methoxyphenyl)-2-phenyl-5,6-dihydro-4*H*-benzo[*d*]furo[2,3-*b*]azepine-1-carbonitrile

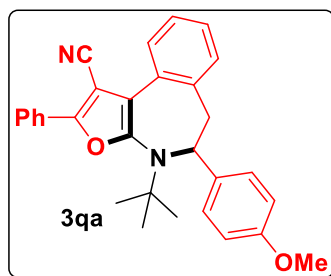

(**3qa**): The residue was purified by column chromatography (Hex/EA = 99/1) on silica gel.  $^1\text{H}$  NMR (400 MHz,  $\text{CDCl}_3$ ):  $\delta$  8.08 (dd,  $J = 7.2, 1.4$  Hz, 2H), 7.63 (d,  $J = 7.4$  Hz, 1H), 7.54 – 7.49 (m, 2H), 7.46 – 7.35 (m, 5H), 7.33 – 7.26 (m, 2H), 6.96 – 6.85 (m, 2H), 4.99 (dd,  $J = 12.3, 3.9$  Hz, 1H), 3.81 (s, 3H), 2.97 (dd,  $J = 14.3, 12.4$  Hz, 1H), 2.75 (dd,  $J = 14.3, 3.9$  Hz, 1H), 0.97 (s, 9H);  $^{13}\text{C}$  NMR (101 MHz,  $\text{CDCl}_3$ )  $\delta$  158.40, 154.61, 154.55, 139.26, 138.41, 131.13, 129.46, 129.27, 129.05,

128.82, 127.65, 127.53, 126.87, 126.28, 125.08, 116.02, 115.11, 113.79, 91.00, 70.51, 58.85, 55.25, 44.51, 28.96; Yield: 84% (75.3 mg), pale yellow solid, m.p. 222-224 °C; HRMS (ESI)  $m/z$ : ( $\text{M}+\text{Na}$ ) $^+$  Calcd. for  $\text{C}_{30}\text{H}_{28}\text{N}_2\text{NaO}_2$  471.2048; found 471.2046.

#### 4-(*tert*-butyl)-2-phenyl-5-(*p*-tolyl)-5,6-dihydro-4*H*-benzo[*d*]furo[2,3-*b*]azepine-1-carbonitrile (**3ra**):

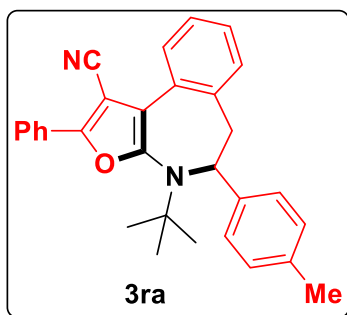

The residue was purified by column chromatography (Hex/EA = 99/1) on silica gel.  $^1\text{H}$  NMR (400 MHz,  $\text{CDCl}_3$ ):  $\delta$  8.09 (s, 2H), 7.64 (s, 1H), 7.53 (s, 2H), 7.47 – 7.26 (m, 1H), 7.48 – 7.23 (m, 6H), 7.17 (dd,  $J = 8.0, 5.4$  Hz, 1H), 4.99 (dt,  $J = 12.3, 3.2$  Hz, 1H), 3.08 – 2.91 (m, 1H), 2.80 – 2.71 (m, 1H), 0.97 (d,  $J = 1.6$  Hz, 9H);  $^{13}\text{C}$  NMR (101 MHz,  $\text{CDCl}_3$ ):  $\delta$  154.62, 154.59, 144.08, 138.44, 136.36, 131.16, 129.45, 129.29, 129.15, 129.05, 128.83, 127.65, 127.54, 126.28, 125.74, 125.08, 116.08, 115.12, 90.99, 70.86, 58.89, 44.41, 28.95, 21.08; Yield: 85% (73.6 mg),

pale yellow solid, m.p. 196-198 °C; HRMS (ESI)  $m/z$ : ( $\text{M}+\text{H}$ ) $^+$  Calcd. for  $\text{C}_{30}\text{H}_{29}\text{N}_2\text{O}$  433.2280; found 433.2272.

#### 4-(*tert*-butyl)-5-(4-chlorophenyl)-2-phenyl-5,6-dihydro-4*H*-benzo[*d*]furo[2,3-*b*]azepine-1-carbonitrile

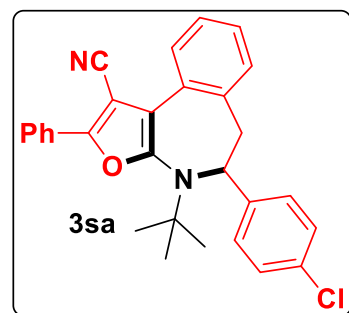

(**3sa**): The residue was purified by column chromatography (Hex/EA = 99/1) on silica gel.  $^1\text{H}$  NMR (400 MHz,  $\text{CDCl}_3$ ):  $\delta$  8.08 (d,  $J = 7.2$  Hz, 2H), 7.67 – 7.60 (m, 1H), 7.54 (d,  $J = 1.7$  Hz, 1H), 7.44 (dd,  $J = 13.2, 8.8$  Hz, 4H), 7.35 (d,  $J = 2.1$  Hz, 4H), 7.34 (s, 1H), 5.03 – 4.94 (m, 1H), 2.96 (s, 1H), 2.81 – 2.68 (m, 1H), 0.95 (d,  $J = 1.4$  Hz, 9H);  $^{13}\text{C}$  NMR (101 MHz,  $\text{CDCl}_3$ ):  $\delta$  154.88, 154.21, 145.52, 137.97, 132.39, 130.98, 129.61, 129.30, 129.08, 128.68, 128.66, 127.82,

127.75, 127.24, 126.39, 125.12, 116.45, 114.97, 91.06, 70.24, 59.14, 44.12, 28.84; Yield: 70% (63.3 mg), pale yellow solid, m.p. 210-212 °C; HRMS (ESI)  $m/z$ : ( $\text{M}+\text{H}$ ) $^+$  Calcd. for  $\text{C}_{29}\text{H}_{26}\text{ClN}_2\text{O}$  453.1734; found 453.1730.

#### 5-(4-bromophenyl)-4-(*tert*-butyl)-2-phenyl-5,6-dihydro-4*H*-benzo[*d*]furo[2,3-*b*]azepine-1-carbonitrile (3ta)

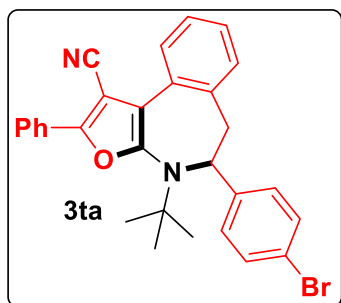

The residue was purified by column chromatography (Hex/EA = 99/1) on silica gel.

$^1\text{H}$  NMR (400 MHz,  $\text{CDCl}_3$ ):  $\delta$  8.11 – 8.04 (m, 2H), 7.64 (d,  $J = 7.6$  Hz, 1H), 7.52 (ddd,  $J = 13.6, 7.2, 1.8$  Hz, 3H), 7.55 – 7.44 (m, 5H), 7.42 – 7.35 (m, 3H), 7.29 (dd,  $J = 6.3, 1.6$  Hz, 2H), 4.97 (dd,  $J = 12.2, 3.8$  Hz, 1H), 2.95 (dd,  $J = 14.3, 12.3$  Hz, 1H), 2.95 (dd,  $J = 14.3, 12.3$  Hz, 1H), 2.75 (dd,  $J = 14.3, 3.9$  Hz, 1H), 0.95 (s, 9H);

$^{13}\text{C}$  NMR (101 MHz,  $\text{CDCl}_3$ ):  $\delta$  154.90, 154.18, 146.06, 137.95, 131.62, 130.97,

129.63, 129.30, 129.08, 129.05, 128.67, 127.84, 127.76, 127.64, 126.40, 125.13, 120.47, 116.48, 114.97, 91.06, 70.28, 59.15, 44.05, 28.84; Yield: 69% (68.5 mg), pale yellow solid, m.p. 227-229 °C; HRMS (EI)  $m/z$ : ( $\text{M}$ ) $^+$  Calcd. for  $\text{C}_{29}\text{H}_{25}\text{BrN}_2\text{O}$  496.1150; found 496.1148.

#### 4-(*tert*-butyl)-5-(naphthalen-2-yl)-2-phenyl-5,6-dihydro-4*H*-benzo[*d*]furo[2,3-*b*]azepine-1-carbonitrile (3ua)

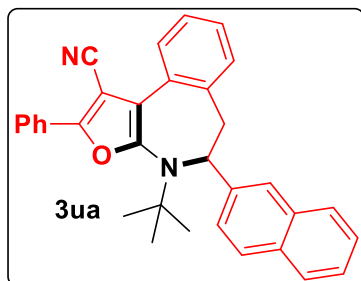

(3ua): The residue was purified by column chromatography (Hex/EA = 99/1) on silica gel.

$^1\text{H}$  NMR (400 MHz,  $\text{CDCl}_3$ ):  $\delta$  8.12 (dd,  $J = 7.2, 1.5$  Hz, 2H), 8.12 (dd,  $J = 7.2, 1.5$  Hz, 2H), 7.91 – 7.82 (m, 3H), 7.66 (dd,  $J = 7.5, 0.8$  Hz, 1H), 7.63 (dd,  $J = 8.5, 1.8$  Hz, 1H), 7.58 – 7.52 (m, 2H), 7.43 – 7.37 (m, 1H), 7.36 – 7.33 (m, 1H), 7.32 – 7.27 (m, 1H), 5.19 (dd,  $J = 11.7, 3.6$  Hz, 1H), 3.09 (dd,  $J = 14.3, 12.3$  Hz, 1H), 2.85 (dd,  $J = 14.4, 3.9$  Hz, 1H), 0.99 (s, 9H);  $^{13}\text{C}$  NMR (101 MHz,

$\text{CDCl}_3$ ):  $\delta$  154.76, 154.56, 144.44, 138.34, 133.44, 132.64, 131.14, 129.53, 129.34, 129.10, 128.84, 128.39, 127.85, 127.75, 127.72, 127.65, 126.37, 126.10, 125.60, 125.12, 124.48, 124.16, 116.23, 115.08, 91.09, 71.21, 59.09, 44.22, 28.99; Yield: 75% (70.2 mg), white solid, m.p. 196-198 °C; HRMS (EI)  $m/z$ : ( $\text{M}$ ) $^+$  Calcd. for  $\text{C}_{33}\text{H}_{28}\text{N}_2\text{O}$  468.2202; found 468.2205.

#### 4-(*tert*-butyl)-5-cyclopropyl-2-phenyl-5,6-dihydro-4*H*-benzo[*d*]furo[2,3-*b*]azepine-1-carbonitrile (3va)

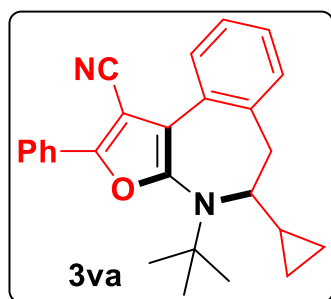

The residue was purified by column chromatography (Hex/EA = 99/1) on silica gel.

$^1\text{H}$  NMR (597 MHz,  $\text{CDCl}_3$ ):  $\delta$  8.02 (d,  $J = 7.6$  Hz, 2H), 7.60 (d,  $J = 7.5$  Hz, 1H), 7.48 (dd,  $J = 10.6, 4.8$  Hz, 2H), 7.40 (t,  $J = 7.3$  Hz, 1H), 7.33 (td,  $J = 7.5, 1.5$  Hz, 1H), 7.33 (td,  $J = 7.5, 1.5$  Hz, 1H), 7.26 – 7.19 (m, 2H), 7.28 – 7.19 (m, 2H), 3.78 – 3.72 (m, 1H), 2.93 (dd,  $J = 14.3, 11.7$  Hz, 1H), 2.74 (dd,  $J = 14.4, 4.6$  Hz, 1H), 0.98 (s, 9H), 0.96 – 0.91 (m, 1H), 0.97 – 0.85 (m, 1H), 0.53 (ddd,  $J = 10.7, 6.6, 2.4$  Hz,

1H), 0.55 – 0.44 (m, 3H), 0.37 (ddd,  $J = 10.9, 6.7, 4.5$  Hz, 1H);  $^{13}\text{C}$  NMR (150 MHz,  $\text{CDCl}_3$ ):  $\delta$  154.83, 154.40, 138.51, 131.54, 129.56, 129.41, 128.97, 128.81, 127.31, 127.15, 126.17, 125.13, 116.69, 115.27, 90.72, 67.05, 58.14, 40.72, 29.27, 18.75, 3.27, 3.21; Yield: 55% (42.1 mg), white solid, m.p. 133-135 °C; HRMS (EI)  $m/z$ : ( $\text{M}$ ) $^+$  Calcd. for  $\text{C}_{26}\text{H}_{26}\text{N}_2\text{O}$  382.2045; found 382.2042.

**4-(tert-butyl)-2-phenyl-5,6-dihydro-4H-benzo[d]furo[2,3-b]azepine-1-carbonitrile (3wa):** The residue was

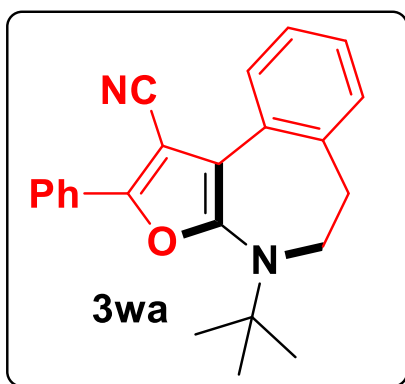

purified by column chromatography (Hex/EA = 99/1) on silica gel.  $^1\text{H}$  NMR (400 MHz,  $\text{CDCl}_3$ ):  $\delta$  7.98 (s, 1H), 7.64 (dd,  $J = 7.7, 2.9$  Hz, 1H), 7.48 (s, 1H), 7.38 (s, 1H), 7.38 (s, 2H), 7.22 (d,  $J = 7.5$  Hz, 1H), 7.22 (d,  $J = 7.5$  Hz, 2H), 3.80 (s, 2H), 2.89 (s, 2H), 1.32 (d,  $J = 1.1$  Hz, 9H);  $^{13}\text{C}$  NMR (101 MHz,  $\text{CDCl}_3$ ):  $\delta$  154.01, 152.43, 139.90, 131.26, 128.98, 128.80, 128.65, 127.17, 126.84, 126.41, 124.41, 115.57, 107.73, 91.84, 57.32, 55.01, 33.73, 29.67, 28.53; Yield: 76% (52.0 mg), pale yellow solid, m.p. 154-156 °C; HRMS (EI)  $m/z$ : (M) $^+$  Calcd. for  $\text{C}_{23}\text{H}_{22}\text{N}_2\text{O}$  342.1732; found 342.1732.

**4-butyl-2,5-diphenyl-5,6-dihydro-4H-benzo[d]furo[2,3-b]azepine-1-carbonitrile (3ab):** The residue was

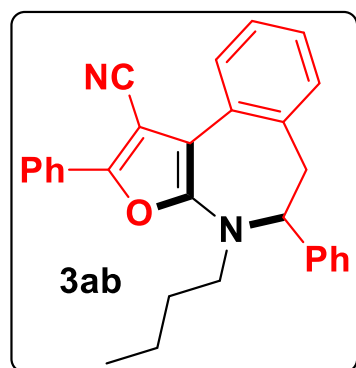

purified by column chromatography (Hex/EA = 99/1) on silica gel;  $^1\text{H}$  NMR (400 MHz,  $\text{CDCl}_3$ ):  $\delta$  8.00 – 7.93 (m, 2H), 7.76 (d,  $J = 7.0$  Hz, 1H), 7.48 (dd,  $J = 10.6, 4.9$  Hz, 2H), 7.40 – 7.32 (m, 1H), 7.29 – 7.13 (m, 4H), 7.21 (dd,  $J = 10.9, 4.3$  Hz, 1H), 7.07 – 7.00 (m, 2H), 6.95 (d,  $J = 7.5$  Hz, 1H), 6.72 (d,  $J = 7.1$  Hz, 1H), 5.08 (dd,  $J = 5.9, 3.1$  Hz, 1H), 3.62 – 3.45 (m, 1H), 3.19 – 3.11 (m, 1H), 1.69 – 1.58 (m, 3H), 1.34 – 1.25 (m, 3H), 0.89 (t,  $J = 7.4$  Hz, 3H);  $^{13}\text{C}$  NMR (101 MHz,  $\text{CDCl}_3$ ):  $\delta$  153.68, 150.84, 141.88, 135.10, 131.20, 130.17, 129.00, 128.63, 128.53, 128.29, 127.28, 127.09, 126.35, 125.51, 125.40, 124.14, 116.12, 92.53, 68.54, 49.89, 41.97, 29.85, 20.12, 13.86; Yield: 69% (57.7 mg), pale yellow solid, m.p. 134-136 °C; HRMS (EI)  $m/z$ : (M) $^+$  Calcd. for  $\text{C}_{29}\text{H}_{26}\text{N}_2\text{O}$  418.2045; found 418.2045.

**4-cyclohexyl-2,5-diphenyl-5,6-dihydro-4H-benzo[d]furo[2,3-b]azepine-1-carbonitrile (3ac):** The residue

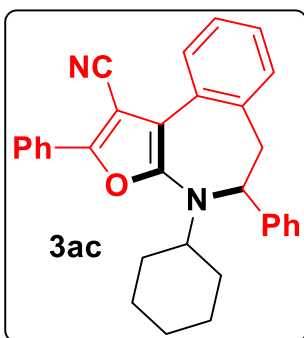

was purified by column chromatography (Hex/EA = 99/1) on silica gel.  $^1\text{H}$  NMR (400 MHz,  $\text{CDCl}_3$ ):  $\delta$  8.02 – 7.95 (m, 2H), 7.73 (dd,  $J = 7.8, 2.6$  Hz, 1H), 7.53 – 7.45 (m, 1H), 7.41 – 7.33 (m, 1H), 7.28 – 7.21 (m, 1H), 7.20 (s, 1H), 7.06 (t,  $J = 5.7$  Hz, 2H), 6.98 – 6.89 (m, 1H), 6.71 (t,  $J = 5.5$  Hz, 1H), 5.16 (t,  $J = 6.1$  Hz, 1H), 3.54 – 3.40 (m, 1H), 3.23 – 3.13 (m, 1H), 3.11 – 3.02 (m, 1H), 3.11 – 3.03 (m, 1H), 1.84 (s, 5H), 1.61 (d,  $J = 14.2$  Hz, 1H), 1.49 – 1.35 (m, 1H), 1.31 – 0.79 (m, 3H);  $^{13}\text{C}$  NMR (101 MHz,  $\text{CDCl}_3$ ):  $\delta$  153.57, 150.98, 143.61, 135.59, 130.97, 129.90, 129.04, 128.70, 128.56, 128.06, 126.99, 126.90, 126.15, 125.66, 125.54, 124.22, 116.06, 92.55, 67.81, 61.23, 42.28, 31.27, 31.03, 26.30, 26.17, 25.64; Yield: 77% (68.4 mg), pale yellow solid, m.p. 112-114 °C; HRMS (EI)  $m/z$ : (M) $^+$  Calcd. for  $\text{C}_{31}\text{H}_{28}\text{N}_2\text{O}$  444.2202; found 444.2202.

**4-(adamantan-1-yl)-2,5-diphenyl-5,6-dihydro-4H-benzo[d]furo[2,3-b]azepine-1-carbonitrile (3ad):** The

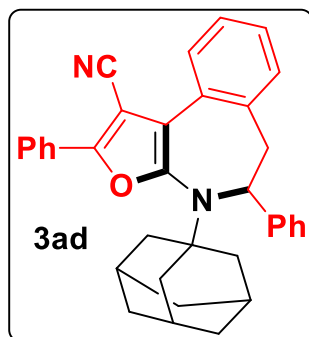

residue was purified by column chromatography (Hex/EA = 99/1) on silica gel.  $^1\text{H}$  NMR (400 MHz,  $\text{CDCl}_3$ ):  $\delta$  8.11 (s, 2H), 7.66 – 7.61 (m, 1H), 7.55 (s, 4H), 7.47 – 7.41 (m, 1H), 7.41 – 7.29 (m, 5H), 7.28 – 7.21 (m, 1H), 5.16 – 5.04 (m, 1H), 3.02 – 2.91 (m, 1H), 2.82 – 2.73 (m, 1H), 1.90 (d,  $J$  = 11.5 Hz, 3H), 1.55 (s, 1H), 1.42 (t,  $J$  = 10.5 Hz, 6H);  $^{13}\text{C}$  NMR (101 MHz,  $\text{CDCl}_3$ ):  $\delta$  154.83, 153.99, 147.40, 138.51, 131.19, 129.51, 129.29, 129.06, 128.87, 128.42, 127.71, 127.62, 126.69, 126.40, 125.86, 125.17, 117.49, 115.09, 90.96, 68.95, 59.47, 44.27, 41.46, 36.07, 29.67;

Yield: 71% (70.5 mg), white solid, m.p. 297 – 299 °C; HRMS (ESI)  $m/z$ :  $(\text{M}+\text{H})^+$  Calcd. for  $\text{C}_{35}\text{H}_{33}\text{N}_2\text{O}$  497.2593; found 497.2585.

**4-(2,6-dimethylphenyl)-2,5-diphenyl-5,6-dihydro-4H-benzo[d]furo[2,3-b]azepine-1-carbonitrile (3ae):** The

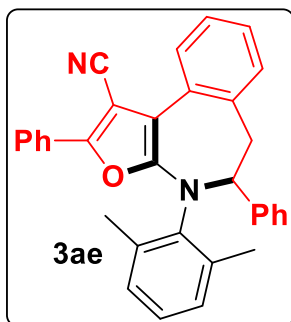

residue was purified by column chromatography (Hex/EA = 99/1) on silica gel.  $^1\text{H}$  NMR (597 MHz,  $\text{CDCl}_3$ ):  $\delta$  7.96 (dd,  $J$  = 7.8, 0.9 Hz, 1H), 7.63 (dd,  $J$  = 5.3, 3.3 Hz, 2H), 7.37 (td,  $J$  = 7.7, 1.3 Hz, 1H), 7.40 – 7.31 (m, 4H), 7.29 – 7.23 (m, 1H), 7.16 – 7.09 (m, 3H), 7.03 (dd,  $J$  = 7.5, 1.1 Hz, 1H), 6.92 (d,  $J$  = 7.3 Hz, 1H), 6.84 (d,  $J$  = 7.3 Hz, 2H), 6.82 (dd,  $J$  = 28.1, 7.4 Hz, 2H), 6.79 (d,  $J$  = 7.5 Hz, 1H), 5.07 (dd,  $J$  = 6.7, 1.9 Hz, 1H), 5.07 (dd,  $J$  = 6.7, 1.9 Hz, 1H), 3.55 (d,  $J$  = 12.7 Hz, 1H), 3.41 (d,  $J$  = 6.5 Hz, 1H), 2.23 (s, 3H), 1.74 (s, 3H);  $^{13}\text{C}$  NMR (150 MHz,  $\text{CDCl}_3$ ):  $\delta$  152.05, 151.47,

141.30, 140.96, 138.35, 135.97, 135.10, 131.17, 130.72, 129.30, 128.84, 128.82, 128.55, 128.31, 127.94, 127.66, 127.64, 127.49, 127.38, 125.82, 125.66, 124.11, 116.17, 92.50, 70.23, 41.50, 29.69, 18.95, 18.82; Yield: 62% (60.5 mg), white solid, m.p. 226 – 227 °C. HRMS (ESI)  $m/z$ :  $(\text{M}+\text{Na})^+$  Calcd. for  $\text{C}_{33}\text{H}_{26}\text{N}_2\text{NaO}$  489.1943; found 489.1939.

**4-(4-ethylphenyl)-2,5-diphenyl-5,6-dihydro-4H-benzo[d]furo[2,3-b]azepine-1-carbonitrile (3af):** The

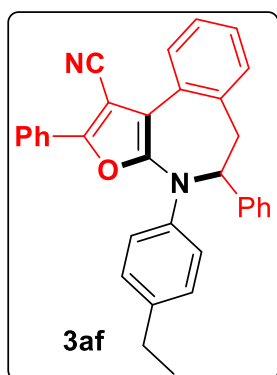

residue was purified by column chromatography (Hex/EA = 99/1) to obtain the product.  $^1\text{H}$  NMR (400 MHz,  $\text{CDCl}_3$ )  $\delta$  7.89 – 7.83 (m, 2H), 7.53 – 7.43 (m, 6H), 7.39 – 7.35 (m, 1H), 7.33 – 7.26 (m, 4H), 7.19 (d,  $J$  = 7.3 Hz, 1H), 7.05 (d,  $J$  = 8.4 Hz, 2H), 6.71 (d,  $J$  = 8.3 Hz, 2H), 4.25 – 4.06 (m, 2H), 3.25 (dd,  $J$  = 14.4, 6.7 Hz, 1H), 2.58 (q,  $J$  = 7.6 Hz, 2H), 1.20 (t,  $J$  = 7.6 Hz, 3H);  $^{13}\text{C}$  NMR (101 MHz,  $\text{CDCl}_3$ )  $\delta$  163.56, 155.63, 143.71, 141.93, 141.67, 140.77, 136.38, 132.33, 128.94, 128.68, 128.28, 127.88, 127.75, 127.41, 127.07, 126.15, 125.46, 123.70, 122.53, 114.99, 89.32, 67.08, 56.26, 34.73, 28.31, 15.51; Yield: 64% (59.65 mg), white solid; m.p. 207 – 209 °C; HRMS (EI)  $m/z$ :

$(\text{M}+\text{H})^+$  Calcd. for  $\text{C}_{33}\text{H}_{26}\text{N}_2\text{O}$  466.2045; found 467.2116.

**4-(4-bromophenyl)-2,5-diphenyl-5,6-dihydro-4H-benzo[d]furo[2,3-b]azepine-1-carbonitrile (3ag):** The

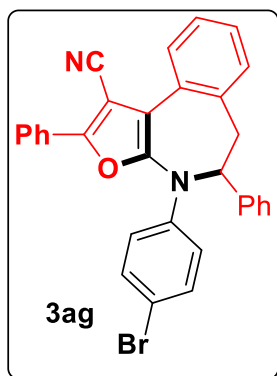

residue was purified by column chromatography (Hex/EA = 99/1) to obtain the product.  $^1\text{H}$  NMR (400 MHz,  $\text{CDCl}_3$ )  $\delta$  8.09 – 7.97 (m, 2H), 7.75 (d,  $J = 7.1$  Hz, 1H), 7.53 – 7.45 (m, 3H), 7.44 – 7.34 (m, 5H), 7.31 – 7.24 (m, 2H), 7.23 – 7.18 (m, 3H), 6.61 – 6.53 (m, 2H), 5.42 (dd,  $J = 9.9, 4.4$  Hz, 1H), 3.26 – 3.10 (m, 2H);  $^{13}\text{C}$  NMR (101 MHz,  $\text{CDCl}_3$ )  $\delta$  155.48, 148.83, 144.61, 142.38, 136.98, 131.79, 131.56, 130.01, 129.95, 129.92, 129.12, 129.02, 128.34, 128.00, 127.96, 127.88, 127.66, 126.99, 126.50, 125.54, 125.10, 118.99, 114.66, 114.01, 91.70, 74.69, 43.27; Yield: 51% (52.63 mg), white solid; m.p. 241 – 243 °C; HRMS (EI)  $m/z$ : ( $\text{M}+\text{H}$ ) $^+$  Calcd. for  $\text{C}_{31}\text{H}_{21}\text{BrN}_2\text{O}$  516.0837; found 517.0909.

**1-(4-(*tert*-butyl)-2,5-diphenyl-5,6-dihydro-4H-benzo[d]furo[2,3-b]azepin-1-yl)ethan-1-one (3ya):** The

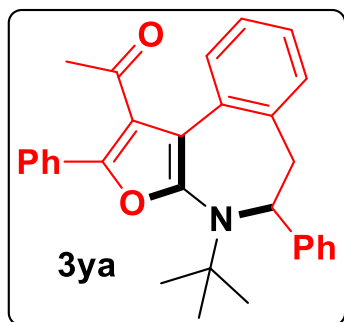

residue was purified by column chromatography (Hex/EA = 99/1) to obtain the product.  $^1\text{H}$  NMR (400 MHz,  $\text{CDCl}_3$ ):  $\delta$  7.81 – 7.76 (m, 2H), 7.52 (dd,  $J = 8.3, 1.3$  Hz, 2H), 7.46 (ddd,  $J = 6.6, 4.3, 0.9$  Hz, 2H), 7.40 – 7.31 (m, 4H), 7.30 – 7.21 (m, 4H), 4.97 (dd,  $J = 12.4, 4.1$  Hz, 1H), 3.10 (dd,  $J = 14.0, 12.4$  Hz, 1H), 2.80 (dd,  $J = 14.1, 4.1$  Hz, 1H), 2.25 (s, 3H), 0.92 (s, 9H);  $^{13}\text{C}$  NMR (101 MHz,  $\text{CDCl}_3$ ):  $\delta$  198.76, 153.96, 148.42, 147.34, 138.62, 133.11, 130.43, 129.00, 128.60, 128.51, 128.38, 127.59, 127.28, 126.98, 126.88, 126.61, 125.90, 122.58, 115.42, 70.77,

58.65, 44.39, 31.50, 28.88; Yield: 73% (63.6 mg), yellow liquid; HRMS (EI)  $m/z$ : ( $\text{M}$ ) $^+$  Calcd. for  $\text{C}_{30}\text{H}_{29}\text{NO}_2$  435.2198; found 435.2196.

**4-(*tert*-butyl)-2,5-diphenyl-5,6-dihydro-4H-benzo[d]furo[2,3-b]azepine-1-carboxamide (5):** Prepare a clean

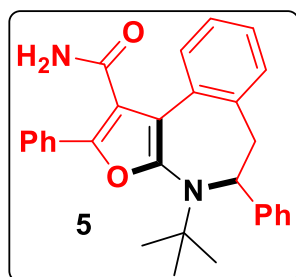

15 mL sealed tube with a magnetic stir bar. **3aa** (0.2 mmol) was added to the bottle, followed by the solvent EtOH (3.0 mL). Finally, NaOH (1.0 equiv) was added and the mixture was heated to 80 °C and the reaction was monitored by TLC. After completion of the reaction, water was added to stop the reaction and the reaction was neutralized to about pH=7 by 1 M  $\text{HCl}_{(\text{aq})}$ , then extracted with ethyl acetate (3 x 15 mL) and water. Finally, all organic layers were combined and removed with

anhydrous sodium sulfate, filtered and concentrated in vacuo. After concentration, the residue was purified by column chromatography (Hex/EA = 5/1) to obtain the product.  $^1\text{H}$  NMR (597 MHz,  $\text{CDCl}_3$ ):  $\delta$  7.98 – 7.78 (m, 2H), 7.56 – 7.40 (m, 3H), 7.32 (d,  $J = 29.1$  Hz, 9H), 7.23 (dd,  $J = 14.6, 7.3$  Hz, 1H), 5.86 (s, 1H), 5.58 (s, 1H), 4.96 (s, 1H), 3.06 (s, 1H), 2.78 (dd,  $J = 14.1, 3.9$  Hz, 1H), 2.40 – 2.03 (m, 1H), 0.93 (s, 9H);  $^{13}\text{C}$  NMR (150 MHz,  $\text{CDCl}_3$ ):  $\delta$  166.87, 153.99, 147.44, 138.80, 132.51, 130.12, 129.04, 128.40, 127.12, 127.06, 126.80,

126.64, 125.89, 125.10, 115.47, 115.00, 70.80, 58.71, 44.47, 28.92, 22.30, 14.02; Yield: 84% (73.3 mg), white solid, m.p. 185 – 186 °C; HRMS (EI) m/z: (M)<sup>+</sup> Calcd. for C<sub>29</sub>H<sub>28</sub>N<sub>2</sub>O<sub>2</sub> 436.2151; found 436.2150.

**(Z)-3-oxo-2-(2-oxo-4-phenyl-2,3,4,5-tetrahydro-1H-benzo[d]azepin-1-ylidene)-3-phenylpropanenitrile (6):**

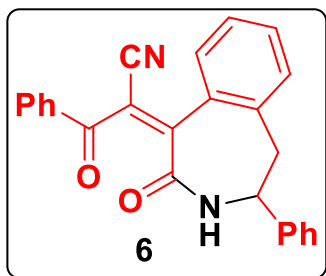

Prepare a clean 15 mL sealed tube with a magnetic stir bar. **3aa** (0.1 mmol) and ACN (3.0 mL) were added to the bottle. TfOH (1.0 equiv) was then added slowly, followed by heating to about 50 °C and the reaction monitored by TLC. After the reaction was completed, cooled to room temperature and then added Na<sub>2</sub>CO<sub>3(aq)</sub> solution to neutralize the reaction to about pH=7. It was then extracted with ethyl acetate (3 x 15 mL) and water. Finally, all organic layers were combined and

removed with anhydrous sodium sulfate, filtered and concentrated in vacuo. After concentration, the residue was purified by column chromatography (Hex/EA = 5/1) to obtain the product. <sup>1</sup>H NMR (597 MHz, CDCl<sub>3</sub>): δ 1H NMR (597 MHz, cdcl3) δ 8.09 – 8.06 (m, 2H), 7.76 – 7.72 (m, 1H), 7.69 – 7.64 (m, 1H), 7.57 – 7.53 (m, 2H), 7.45 – 7.41 (m, 2H), 7.39 – 7.33 (m, 5H), 7.22 (dd, J = 6.2, 2.6 Hz, 1H), 6.14 (s, 1H), 4.94 (d, J = 9.6 Hz, 1H), 3.45 (dd, J = 16.2, 11.3 Hz, 1H), 3.34 (d, J = 16.4 Hz, 1H); <sup>13</sup>C NMR (150 MHz, CDCl<sub>3</sub>): δ 187.75, 166.01, 159.69, 139.84, 135.93, 134.74, 134.46, 131.24, 130.92, 130.29, 129.70, 129.14, 129.06, 128.93, 128.62, 127.60, 126.36, 117.93, 114.97, 57.14, 40.44; Yield: 92 % and 83 % (34.8 mg and 31.4 mg), white solid, m.p. 198 – 199 °C; HRMS (ESI) m/z: (M+H)<sup>+</sup> Calcd. for C<sub>25</sub>H<sub>19</sub>N<sub>2</sub>O<sub>2</sub> 379.1447; found 379.1442.

**(Z)-2-(3-(tert-butyl)-2-oxo-4-phenyl-2,3,4,5-tetrahydro-1H-benzo[d]azepin-1-ylidene)-3-oxo-3-**

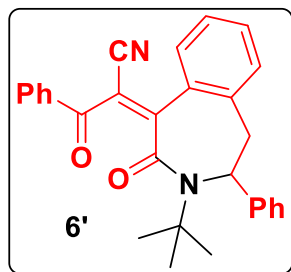

**phenylpropanenitrile (6')**: Prepare a clean 15 mL sealed tube with a magnetic stir bar. **3aa** (0.2 mmol), TBN (5.0 equiv), *p*-NBA (1.0 equiv), and *p*-dioxane (3.0 mL) were added to the bottle in sequence. The tube was then filled with oxygen and then heated to about 45 °C and the reaction was monitored by TLC. After the reaction was completed, cooled to room temperature and then added Na<sub>2</sub>CO<sub>3(aq)</sub> solution to neutralize the reaction to about pH=7. It was then extracted with ethyl acetate (3 x 15

mL) and ater. Finally, all organic layers were combined and removed with anhydrous sodium sulfate, filtered and concentrated in vacuo. After concentration, the residue was purified by column chromatography (Hex/EA = 9/1) to obtain the product. <sup>1</sup>H NMR (400 MHz, CDCl<sub>3</sub>): δ 7.79 – 7.75 (m, 2H), 7.72 (dd, J = 8.1, 1.4 Hz, 1H), 7.57 – 7.51 (m, 1H), 7.50 – 7.47 (m, 1H), 7.46 – 7.36 (m, 2H), 7.34 – 7.29 (m, 2H), 7.25 (ddd, J = 8.7, 4.8, 1.2 Hz, 2H), 7.25 (ddd, J = 8.7, 4.8, 1.2 Hz, 1H), 7.17 (dd, J = 7.3, 1.5 Hz, 1H), 5.37 (t, J = 4.5 Hz, 1H), 3.83 (dd, J = 18.2, 4.3 Hz, 1H), 3.52 (dd, J = 18.2, 4.6 Hz, 1H), 1.64 (s, 9H); <sup>13</sup>C NMR (101 MHz, CDCl<sub>3</sub>): δ 186.04, 166.53, 165.07, 138.84, 136.19, 136.03, 133.24, 131.78, 130.48, 130.38, 130.26, 128.96, 128.32, 128.30, 127.44, 127.33, 127.17, 116.72, 110.71, 59.61, 54.74, 36.71, 29.09; Yield: 90 % (78.1 mg), white solid, m.p. 197 – 198 °C; HRMS (ESI) m/z: (M+H)<sup>+</sup> Calcd. for C<sub>29</sub>H<sub>27</sub>N<sub>2</sub>O<sub>2</sub> 435.2073; found 435.2068.



**(E)-4-(tert-butyl)-2-(3-(4-methylstyryl)phenyl)-5-phenyl-5,6-dihydro-4H-benzo[d]furo[2,3-b]azepine-1-**

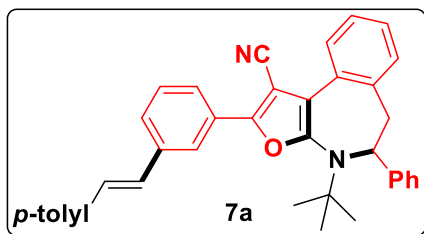

**carbonitrile (7a):** First, **3ja** (1.0 equiv, 0.1 mmol), Pd(OAc)<sub>2</sub> (0.1 equiv), and (*S*)-(-)-BINAP (0.2 equiv) were added to a 25 mL round-bottomed flask, respectively, followed by nitrogen. The round bottom flask was filled with nitrogen. Next, 5 mL of DMF was added as a solvent, then K<sub>2</sub>CO<sub>3</sub> (2.0 equiv) was added. After waiting for the reaction to react at room

temperature for 10 minutes, 4-methyl styrene (7.0 equiv) was slowly added. Heating to 120°C and was monitored by TLC. After the reaction was completed, the reaction was cooled to room temperature, and secondary water was added, followed by extraction with ethyl acetate and water. After 2~3 times in total, all organic layers were combined and removed with anhydrous sodium sulfate. The water was concentrated by a vacuum concentrator to obtain the crude product, and then further purified by column chromatography (Hex/EA = 50/1) to obtain the compound. <sup>1</sup>H NMR (400 MHz, CDCl<sub>3</sub>): δ 8.14 (s, 1H), 7.96 (d, *J* = 7.9 Hz, 1H), 7.63 (dd, *J* = 15.7, 7.6 Hz, 2H), 7.55 – 7.45 (m, 5H), 7.39 (dt, *J* = 15.1, 4.9 Hz, 3H), 7.44 – 7.26 (m, 6H), 7.26 – 7.14 (m, 5H), 5.03 (dd, *J* = 12.3, 3.7 Hz, 1H), 3.07 – 2.96 (m, 1H), 2.79 (dd, *J* = 14.4, 3.8 Hz, 1H), 2.38 (s, 3H), 0.98 (s, 9H); <sup>13</sup>C NMR (101 MHz, CDCl<sub>3</sub>): δ 154.58, 146.98, 138.41, 137.92, 134.17, 131.12, 129.92, 129.44, 129.38, 129.30, 129.20, 128.51, 127.73, 127.63, 126.88, 126.83, 126.65, 126.61, 126.35, 126.31, 125.85, 123.97, 123.28, 116.27, 115.09, 91.23, 71.06, 59.06, 44.32, 28.95, 21.30; Yield: 71% (38.0 mg), pale yellow solid, m.p. 178 – 179 °C; HRMS (EI) *m/z*: (M)<sup>+</sup> Calcd. for C<sub>38</sub>H<sub>34</sub>N<sub>2</sub>O 534.2671; found 534.2671.

**(E)-4-(tert-butyl)-2-(3-(2-(naphthalen-2-yl)vinyl)phenyl)-5-phenyl-5,6-dihydro-4H-benzo[d]furo[2,3-**

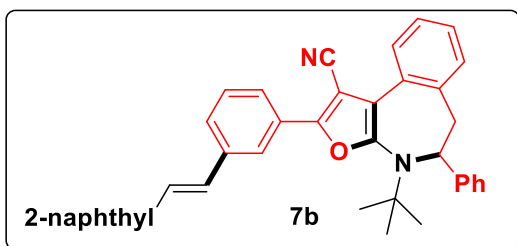

**b]azepine-1-carbonitrile (7b):** First, **3ja** (1.0 equiv, 0.1 mmol), Pd(OAc)<sub>2</sub> (0.1 equiv), and (*S*)-(-)-BINAP (0.2 equiv) were added to a 25 mL round-bottomed flask, respectively, followed by nitrogen. The round bottom flask was filled with nitrogen. Next, 5 mL of DMF was added as a solvent, then K<sub>2</sub>CO<sub>3</sub> (2.0 equiv) was added. After

waiting for the reaction to react at room temperature for 10 minutes, 2-naphthylstyrene (7.0 equiv) was slowly added. Heating to 120°C and was monitored by TLC. After the reaction was completed, the reaction was cooled to room temperature, and secondary water was added, followed by extraction with ethyl acetate and water. After 2~3 times in total, all organic layers were combined and removed with anhydrous sodium sulfate. The water was concentrated by a vacuum concentrator to obtain the crude product, and then further purified by column chromatography (Hex/EA = 50/1) to obtain the compound. <sup>1</sup>H NMR (597 MHz, CDCl<sub>3</sub>): δ 8.22 (s, 1H), 7.99 (d, *J* = 7.0 Hz, 1H), 7.93 (s, 1H), 7.86 (dd, *J* = 8.2, 3.4 Hz, 2H), 7.87 – 7.79 (m, 4H), 7.66 (d, *J* = 5.0 Hz, 2H), 7.54 (t, *J* = 7.7 Hz, 1H), 7.48 (ddt, *J* = 7.6, 2.4, 1.5 Hz, 4H), 7.41 (t, *J* = 7.6 Hz, 1H), 7.35 (d, *J* = 9.4 Hz, 1H), 7.31 (dd, *J* = 16.6, 6.1 Hz, 2H), 7.27 – 7.24 (m, 2H), 5.04 (d, *J* = 11.4 Hz, 1H), 3.02 (dd, *J* = 14.3, 12.6 Hz, 1H), 2.80 (dd, *J* = 14.4, 3.7 Hz, 1H), 1.00 (s, 9H); <sup>13</sup>C NMR (150 MHz, CDCl<sub>3</sub>): δ 154.67, 154.52, 146.98, 138.39, 138.29,

134.47, 133.69, 133.21, 131.12, 130.09, 129.46, 129.31, 128.53, 128.38, 128.35, 128.22, 128.08, 127.77, 127.76, 127.71, 127.64, 127.03, 126.84, 126.39, 126.06, 125.86, 124.22, 123.57, 123.38, 116.31, 115.09, 91.33, 71.09, 59.08, 44.33, 28.99; Yield: 75% (42.8 mg), pale yellow solid, m.p. 223 – 224 °C; HRMS (EI) m/z: (M)<sup>+</sup> Calcd. for C<sub>41</sub>H<sub>34</sub>N<sub>2</sub>O 570.2671; found 570.2670.

### 2-(2-bromophenyl)-4-(*tert*-butyl)-5-phenyl-5,6-dihydro-4*H*-benzo[*d*]furo[2,3-*b*]azepine-1-carboxamide (**8**):

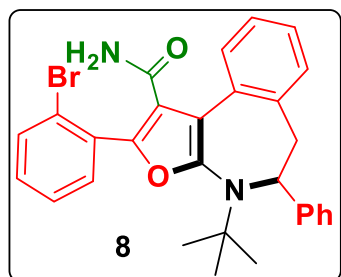

Prepare a clean 15 mL sealed tube with a magnetic stir bar. **3ka** (0.2 mmol) was added to the bottle, followed by the solvent EtOH (3.0 mL). Finally, NaOH (1.0 equiv) was added and the mixture was heated to 80 °C and the reaction was monitored by TLC. After completion of the reaction, water was added to stop the reaction and the reaction was neutralized to about pH=7 by 1 M HCl<sub>(aq)</sub>, then extracted with ethyl acetate (3 x 15 mL) and water. Finally, all organic layers were

combined and removed with anhydrous sodium sulfate, filtered and concentrated in vacuo. After concentration, the residue was purified by column chromatography (Hex/EA = 5/1) to obtain the product. <sup>1</sup>H NMR (400 MHz, CDCl<sub>3</sub>): δ 7.71 (dd, *J* = 8.0, 1.3 Hz, 1H), 7.60 (dd, *J* = 7.6, 1.7 Hz, 2H), 7.55 – 7.49 (m, 3H), 7.44 – 7.40 (m, 1H), 7.33 (dd, *J* = 7.4, 1.5 Hz, 5H), 7.25 – 7.18 (m, 1H), 5.47 (s, 1H), 4.95 (dd, *J* = 12.5, 4.1 Hz, 1H), 3.07 (dd, *J* = 14.0, 12.5 Hz, 1H), 2.78 (dd, *J* = 14.0, 4.1 Hz, 1H), 1.78 (d, *J* = 46.4 Hz, 2H), 0.90 (s, 9H); <sup>13</sup>C NMR (101 MHz, CDCl<sub>3</sub>): δ 160.43, 156.65, 152.76, 147.20, 138.64, 136.18, 131.98, 130.03, 128.84, 128.63, 128.46, 127.17, 126.71, 125.94, 122.64, 120.63, 116.16, 113.64, 112.43, 71.71, 58.90, 44.52, 29.02, 22.32, 14.05; Yield: 67% (68.9 mg), pale yellow solid, m.p. 177 – 178 °C; HRMS (EI) m/z: (M)<sup>+</sup> Calcd. for C<sub>29</sub>H<sub>27</sub>BrN<sub>2</sub>O<sub>2</sub> 514.1256; found 514.1260.

### 13-(*tert*-butyl)-12-phenyl-5,11,12,13-tetrahydro-6*H*-benzo[4',5']azepino[3',2':4,5]furo[3,2-*c*]quinolin-6-

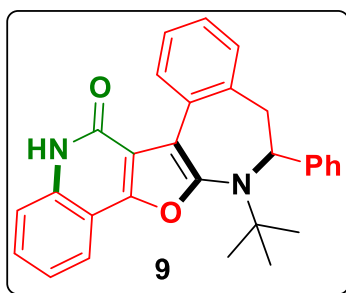

**one (9)**: Prepare a clean 15 mL sealed tube with a magnetic stir bar. To the bottle was added **8** (0.1 mmol), *t*-BuOK (3.0 equiv), and the solvent ethanol (2.0 mL). Later, CuI (10 mol%) was added and heated to 100 °C, and the reaction was monitored by TLC. After the reaction was completed, water was added to stop the reaction, followed by extraction with ethyl acetate (3×15 mL) and water. Finally, all organic layers were combined and removed with anhydrous sodium sulfate,

filtered and concentrated in vacuo. After concentration, the residue was purified by column chromatography (Hex/EA = 19/1) to obtain the product. <sup>1</sup>H NMR (400 MHz, CDCl<sub>3</sub>): δ 11.16 (s, 1H), 8.09 (dd, *J* = 7.9, 1.0 Hz, 1H), 8.02 (d, *J* = 7.4 Hz, 1H), 7.57 – 7.52 (m, 2H), 7.51 – 7.42 (m, 3H), 7.39 – 7.18 (m, 7H), 5.08 (dd, *J* = 12.5, 4.0 Hz, 1H), 3.12 – 3.01 (m, 1H), 2.80 (dd, *J* = 14.2, 4.1 Hz, 1H), 0.98 (s, 9H); <sup>13</sup>C NMR (101 MHz, CDCl<sub>3</sub>): δ 160.42, 156.64, 152.75, 147.19, 138.63, 136.18, 131.97, 130.03, 128.83, 128.62, 128.45, 127.17, 126.71, 125.93, 122.64, 120.63, 116.15, 113.64, 112.42, 71.70, 58.90, 44.52, 29.03, 22.33, 14.05; Yield: 75% (32.6 mg), white solid, m.p. 286 – 287 °C; HRMS (EI) m/z: (M)<sup>+</sup> Calcd. for C<sub>29</sub>H<sub>26</sub>N<sub>2</sub>O<sub>2</sub> 434.1994; found 434.1994.



**(E)-5-(tert-butylamino)-2-phenyl-4-(2-styrylphenyl)furan-3-carbonitrile (3aa')**: The residue was purified by

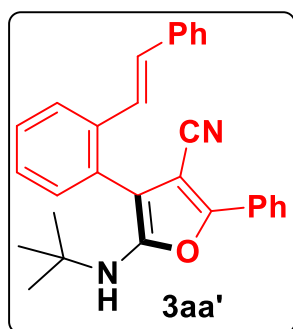

column chromatography (Hex/EA = 99/1) on silica gel.  $^1\text{H}$  NMR (400 MHz,  $\text{CDCl}_3$ )  $\delta$  8.00 – 7.93 (m, 2H), 7.78 – 7.72 (m, 1H), 7.47 (tt,  $J = 9.7, 1.6$  Hz, 4H), 7.42 – 7.31 (m, 6H), 7.28 – 7.23 (m, 2H), 7.16 (d,  $J = 16.3$  Hz, 1H), 7.04 (d,  $J = 16.2$  Hz, 1H), 2.67 (s, 1H), 1.19 (s, 9H);  $^{13}\text{C}$  NMR (101 MHz,  $\text{CDCl}_3$ ):  $\delta$  152.44, 151.86, 137.17, 136.00, 131.00, 130.80, 129.02, 128.98, 128.69, 128.59, 128.21, 128.08, 127.96, 127.08, 126.66, 126.23, 124.20, 115.27, 102.71, 94.37, 53.27, 29.98; Yield: 94% (78.9 mg), yellow solid, m.p. 160 – 161 °C; HRMS (ESI)  $m/z$ :  $(\text{M}+\text{H})^+$  Calcd. for  $\text{C}_{29}\text{H}_{27}\text{N}_2\text{O}$

419.2123; found 419.2126.

**4-(tert-butyl)-2,5-diphenyl-5,6-dihydro-4H-benzo[d]furo[2,3-b]azepine-1-carbonitrile-6-D (3aa'')**: The

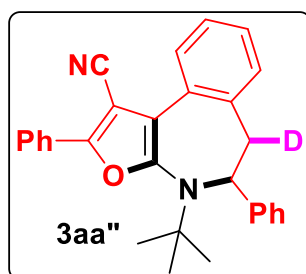

residue was purified by column chromatography (Hex/EA = 99/1) on silica gel.  $^1\text{H}$  NMR (400 MHz,  $\text{CDCl}_3$ ):  $\delta$  8.08 (d,  $J = 7.6$  Hz, 2H), 7.63 (d,  $J = 7.6$  Hz, 1H), 7.57 – 7.39 (m, 6H), 7.38 – 7.22 (m, 5H), 5.02 (s, 1H), 3.04 – 2.94 (m, 1H), 2.77 (d,  $J = 3.7$  Hz, 1H), 0.97 (s, 9H);  $^{13}\text{C}$  NMR (101 MHz,  $\text{CDCl}_3$ ):  $\delta$  154.70, 154.51, 146.96, 138.32, 131.13, 129.50, 129.30, 129.05, 128.79, 128.49, 127.70, 127.59, 126.80, 126.32, 125.83, 125.11, 116.16, 115.09, 91.01, 70.97, 58.96, 44.31, 44.14, 43.95,

43.75, 28.94; Yield: 80% (67.0 mg), white solid, m.p. 171 – 172 °C; HRMS (ESI)  $m/z$ :  $(\text{M}+\text{H})^+$  Calcd. for  $\text{C}_{29}\text{H}_{26}\text{DN}_2\text{O}$  420.2186; found 420.2184.

## 8. References

1. M. R. Mutra and J.-J. Wang, *Nat. Commun.*, 2022, **13**, 2345.
2. B. S. Gore, C.-H. Chiang, C. C. Lee, Y.-L. Shih, J.-J. Wang, *Org. Lett.* 2020, **22**, 7848-7852.

8.476  
8.216  
8.196  
8.018  
8.013  
8.009  
7.830  
7.810  
7.809  
7.710  
7.650  
7.648  
7.563  
7.500  
7.496  
7.478  
7.443  
7.403  
7.385  
7.382  
7.366  
7.340  
7.330  
7.322  
7.310  
7.290  
7.261  
7.253  
6.926  
6.886

Solvent CDCl<sub>3</sub>  
Spectrometer Frequency 400

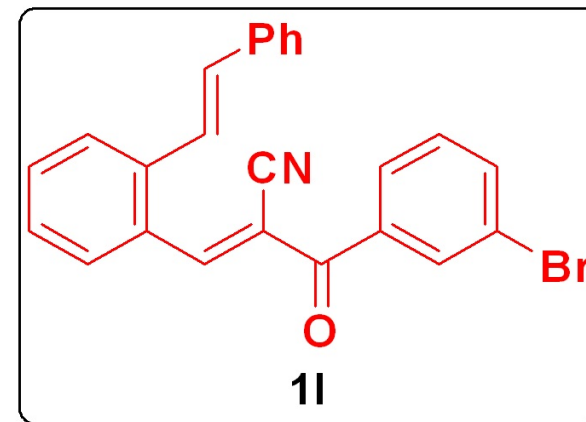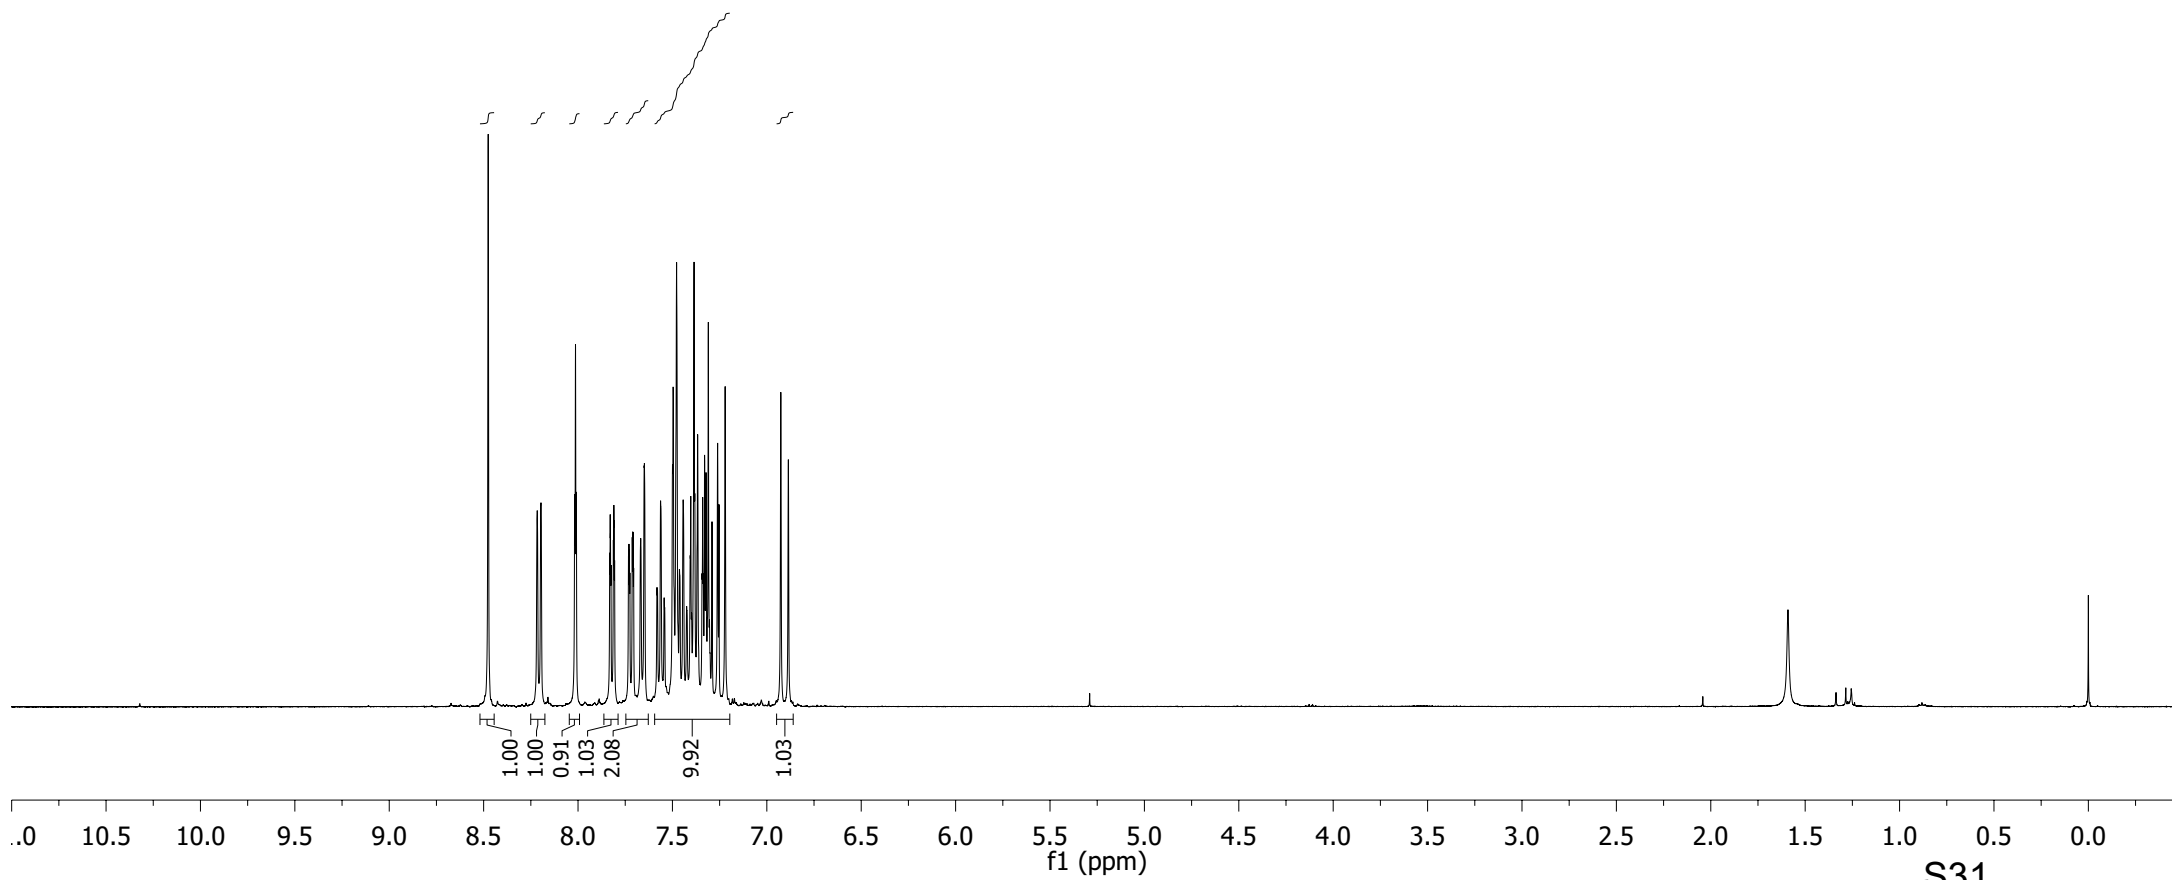

S31

187.547  
154.934  
139.912  
136.223  
135.653  
132.909  
132.028  
130.103  
129.018  
128.854  
128.693  
127.984  
127.773  
127.643  
126.903  
124.561  
123.026  
116.247  
111.574

77.310  
76.992  
76.675

Solvent CDCl<sub>3</sub>  
Spectrometer Frequency 100

139.912  
137.566  
136.350  
136.223  
135.653  
132.909  
132.028  
130.103  
129.705  
129.018  
128.854  
128.693  
127.984  
127.773  
127.643  
126.903  
124.561  
123.026  
116.247  
111.574

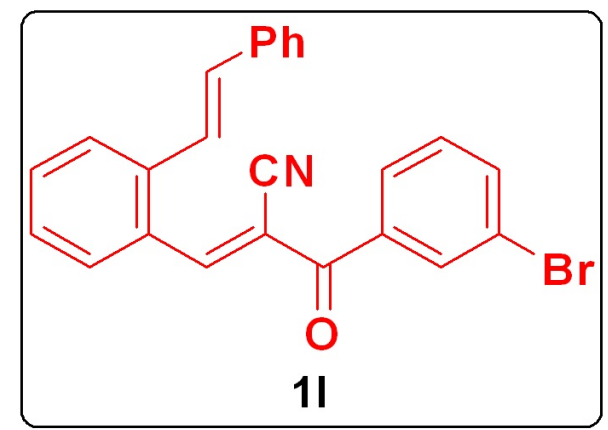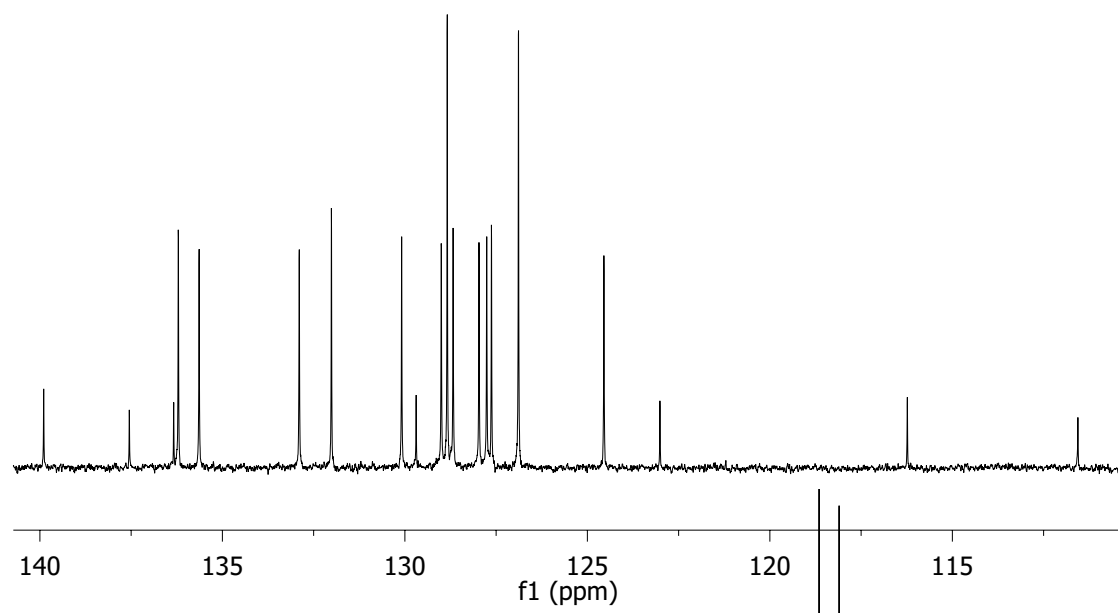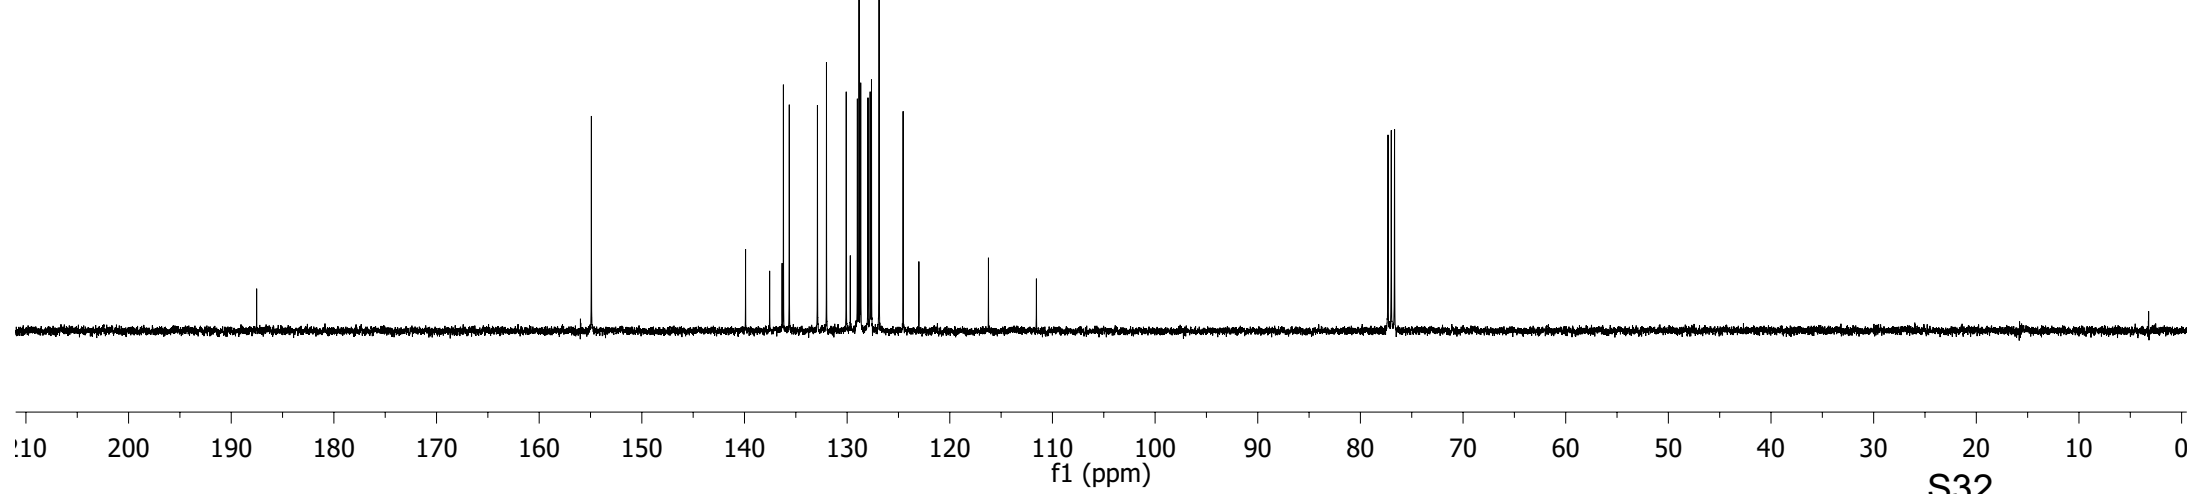

Solvent  $\text{CDCl}_3$   
Spectrometer Frequency 400

8.255  
8.251  
8.235  
8.231  
7.549  
7.434  
7.417  
7.414  
7.386  
7.332  
7.330  
6.805  
6.765

7.617  
7.614  
7.597  
7.594  
7.571  
7.568  
7.564  
7.552  
7.549  
7.545  
7.530  
7.526  
7.453  
7.449  
7.439  
7.434  
7.430  
7.422  
7.417  
7.414  
7.406  
7.403  
7.388  
7.386  
7.381  
7.377  
7.366  
7.364  
7.358  
7.350  
7.346  
7.332  
7.328  
7.313  
7.310  
7.306  
7.301  
7.287  
7.282  
7.268  
7.170  
7.130  
6.805  
6.765

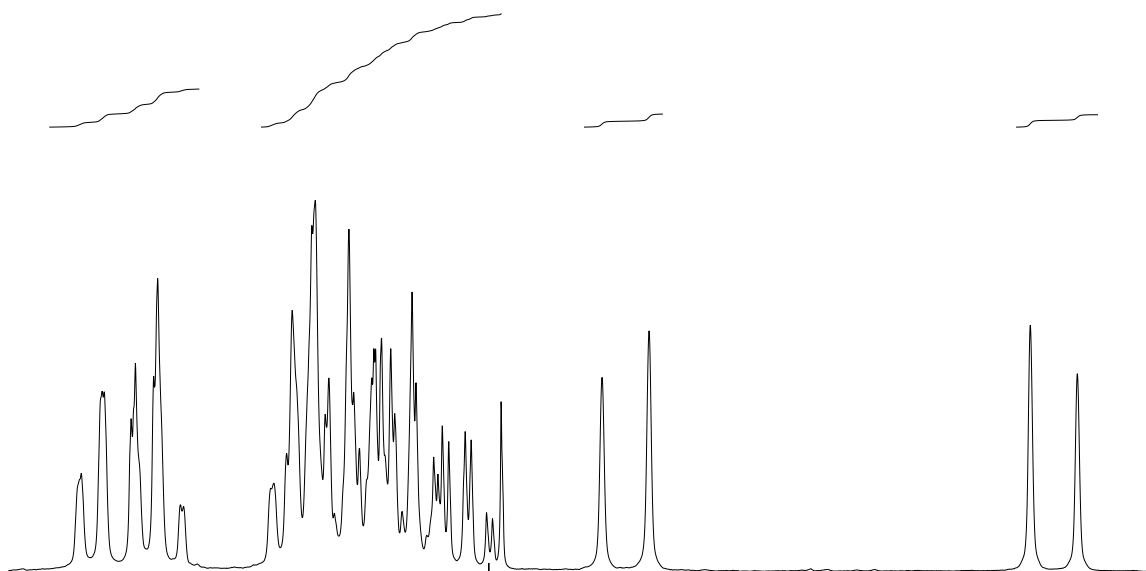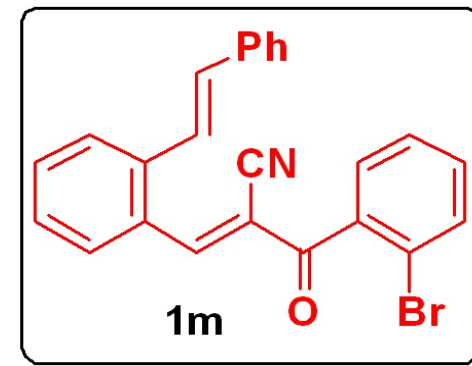

.0 10.5 10.0 9.5 9.0 8.5 8.0 7.5 7.0 6.5 6.0 5.5 5.0 4.5 4.0 3.5 3.0 2.5 2.0 1.5 1.0 0.5 0.0  
f1 (ppm)  
S33

Solvent  $\text{CDCl}_3$   
Spectrometer Frequency 100

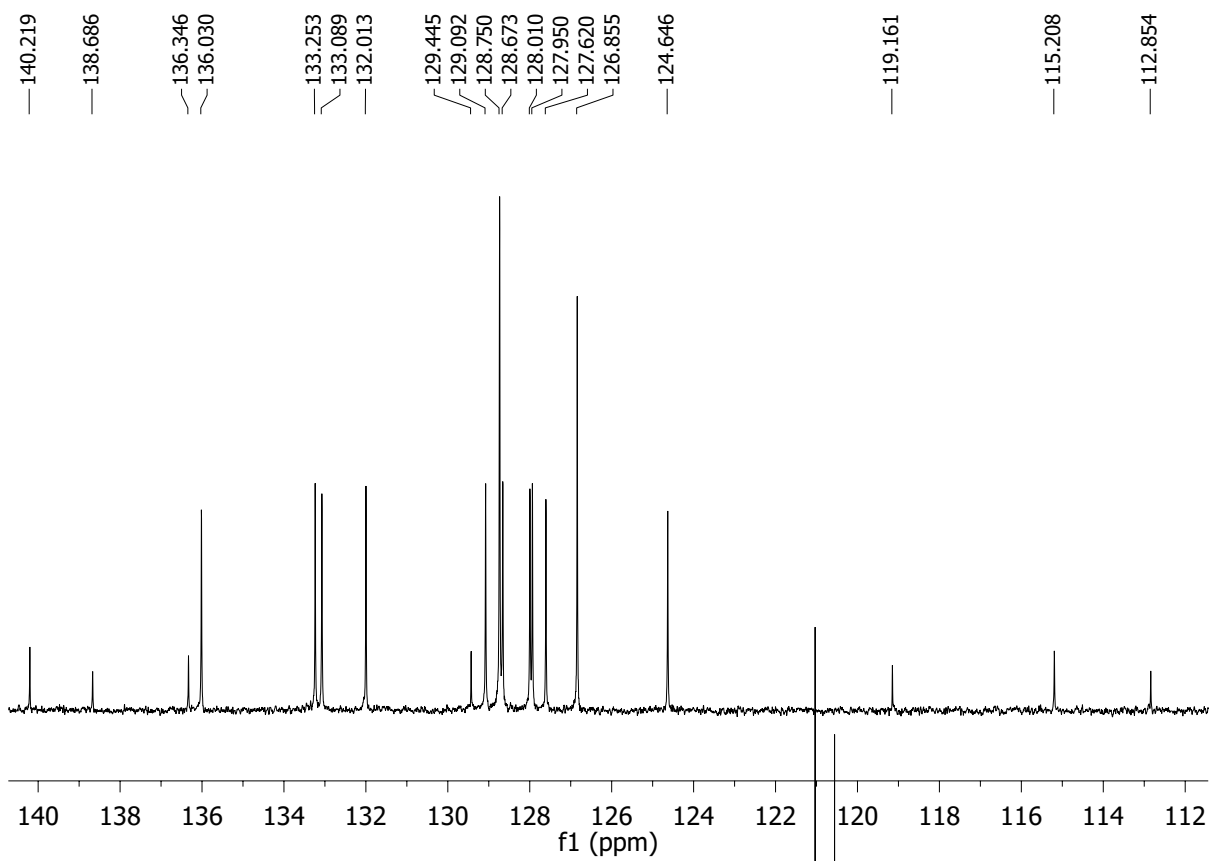

77.309  
76.992  
76.674

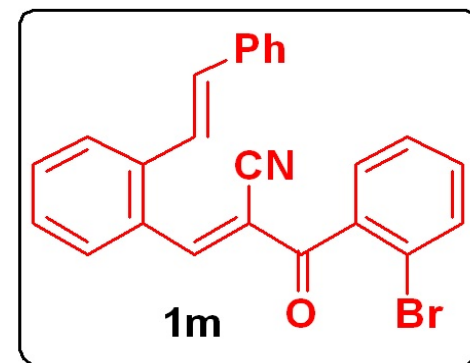

190 200 180 170 160 150 140 130 120 110 100 90 80 70 60 50 40 30 20 10 0  
f1 (ppm)

S34

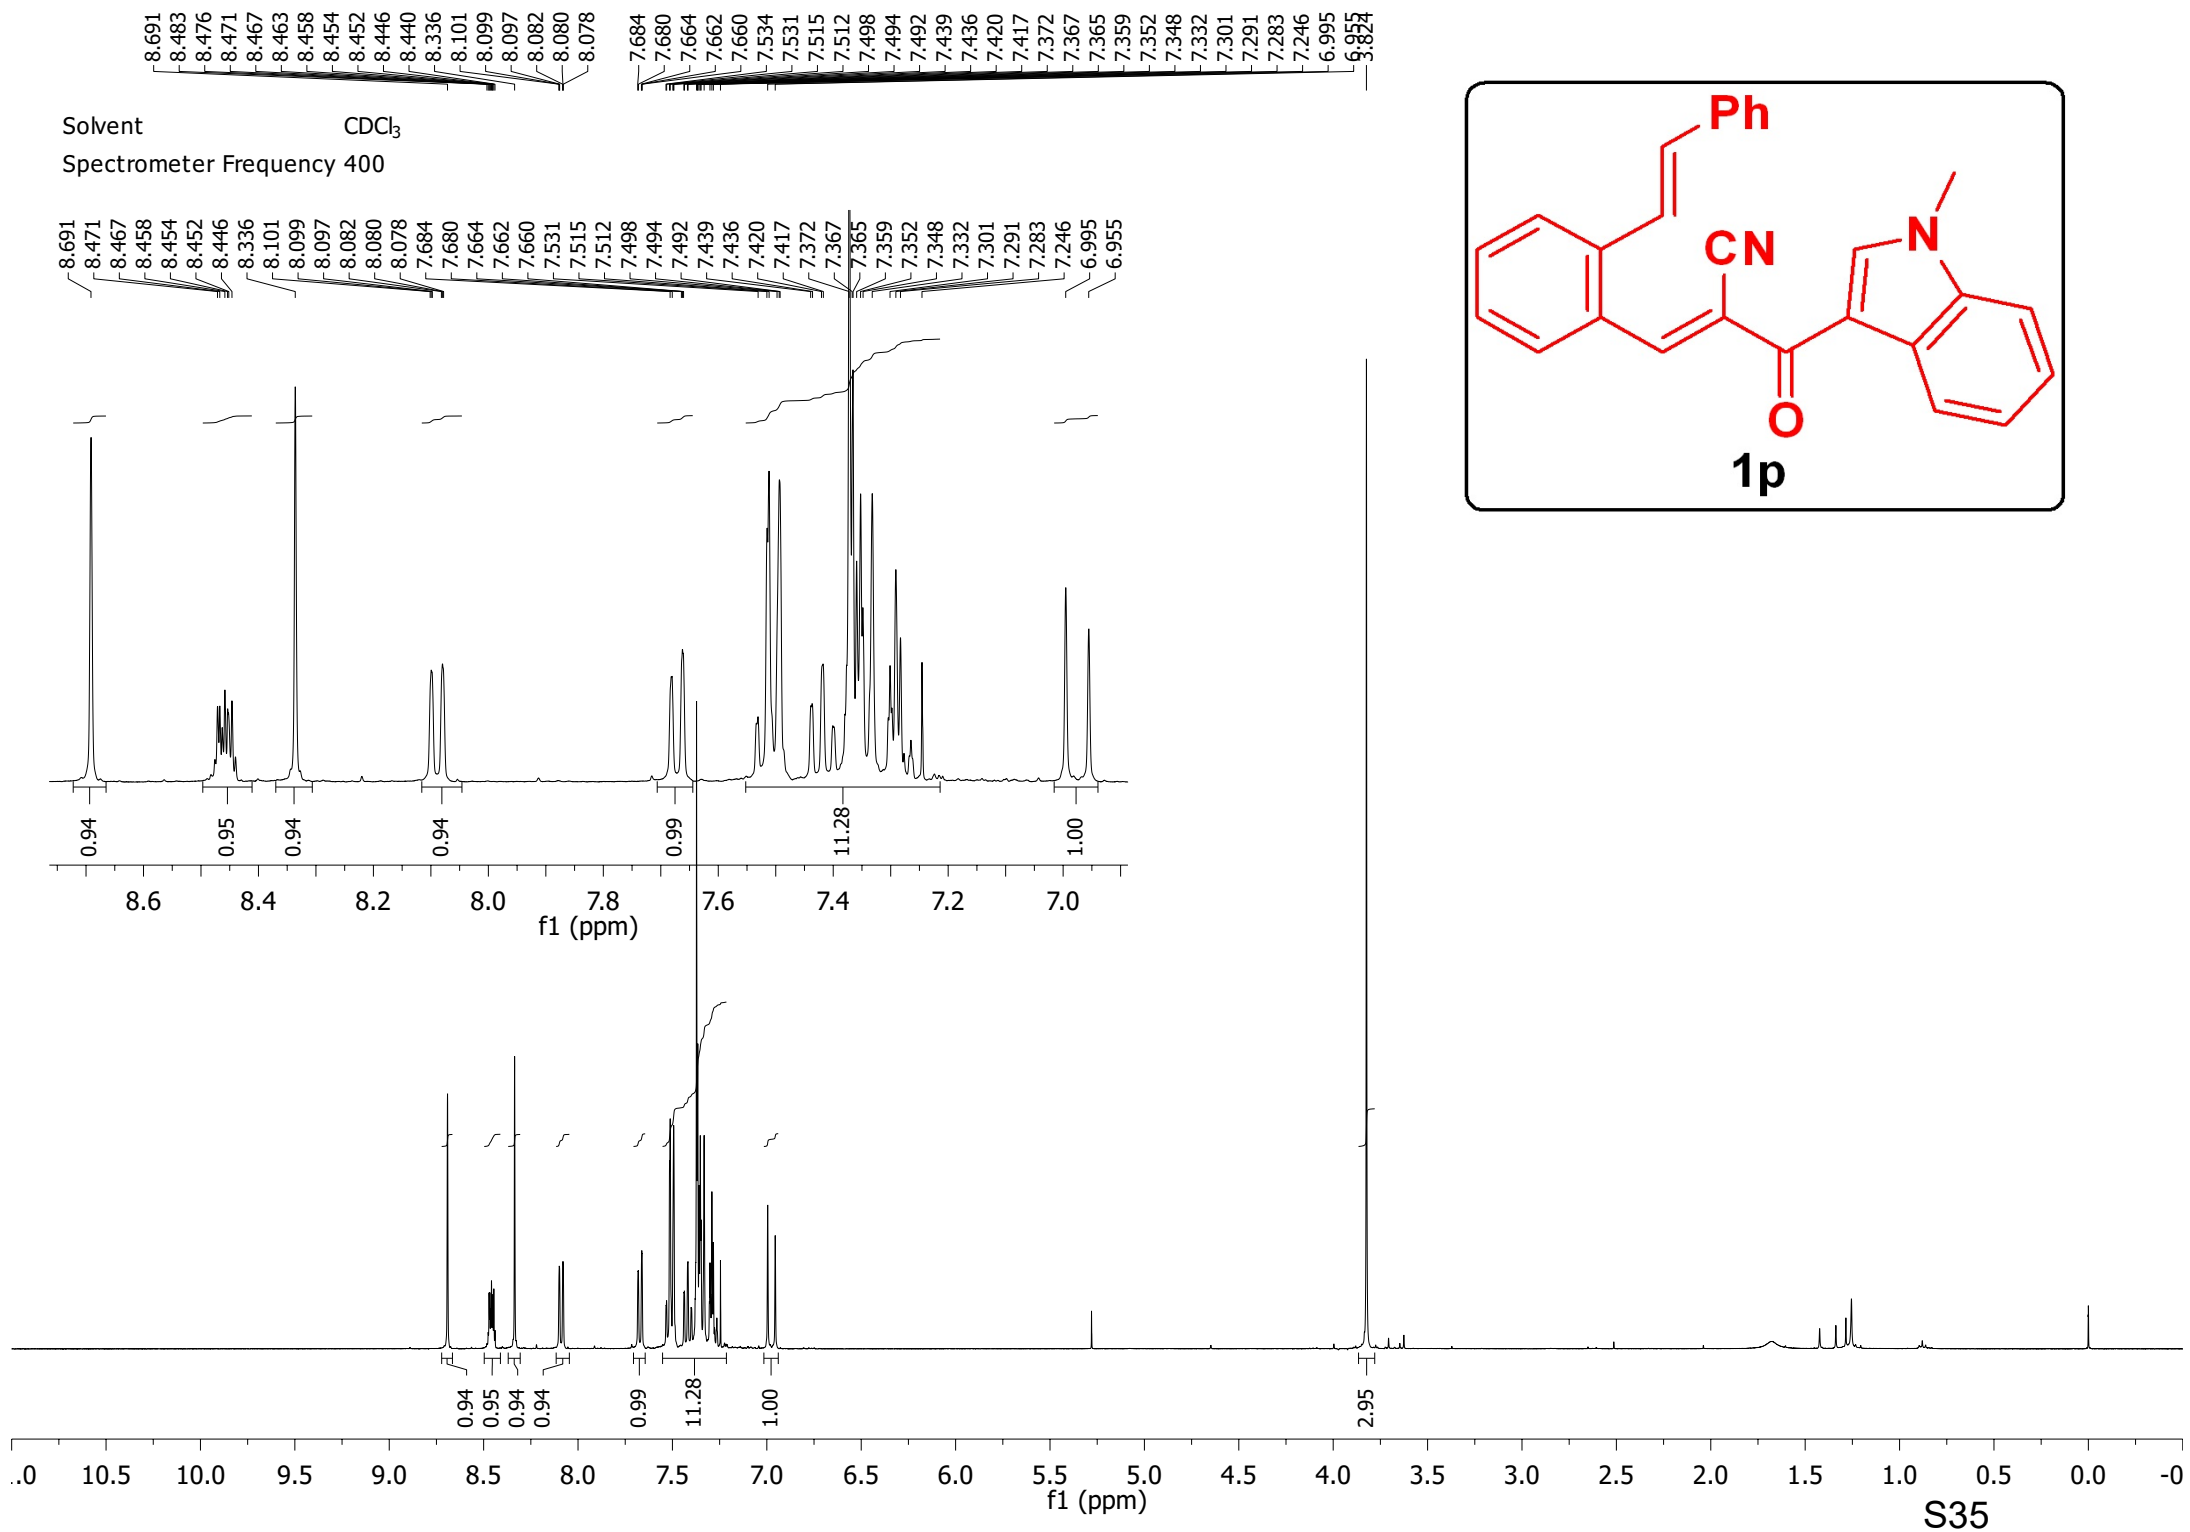

Solvent  $\text{CDCl}_3$   
Spectrometer Frequency 100

178.767

152.764  
139.025  
137.223  
137.012  
136.622  
134.386  
131.793  
130.720  
128.882  
128.761  
128.401  
127.769  
127.436  
127.238  
126.907  
124.971  
124.110  
123.373  
122.947  
118.581  
114.164  
112.708  
109.867

77.309  
76.991  
76.674

3.793

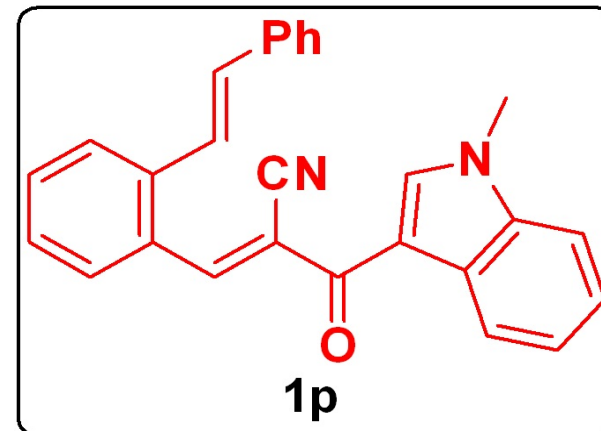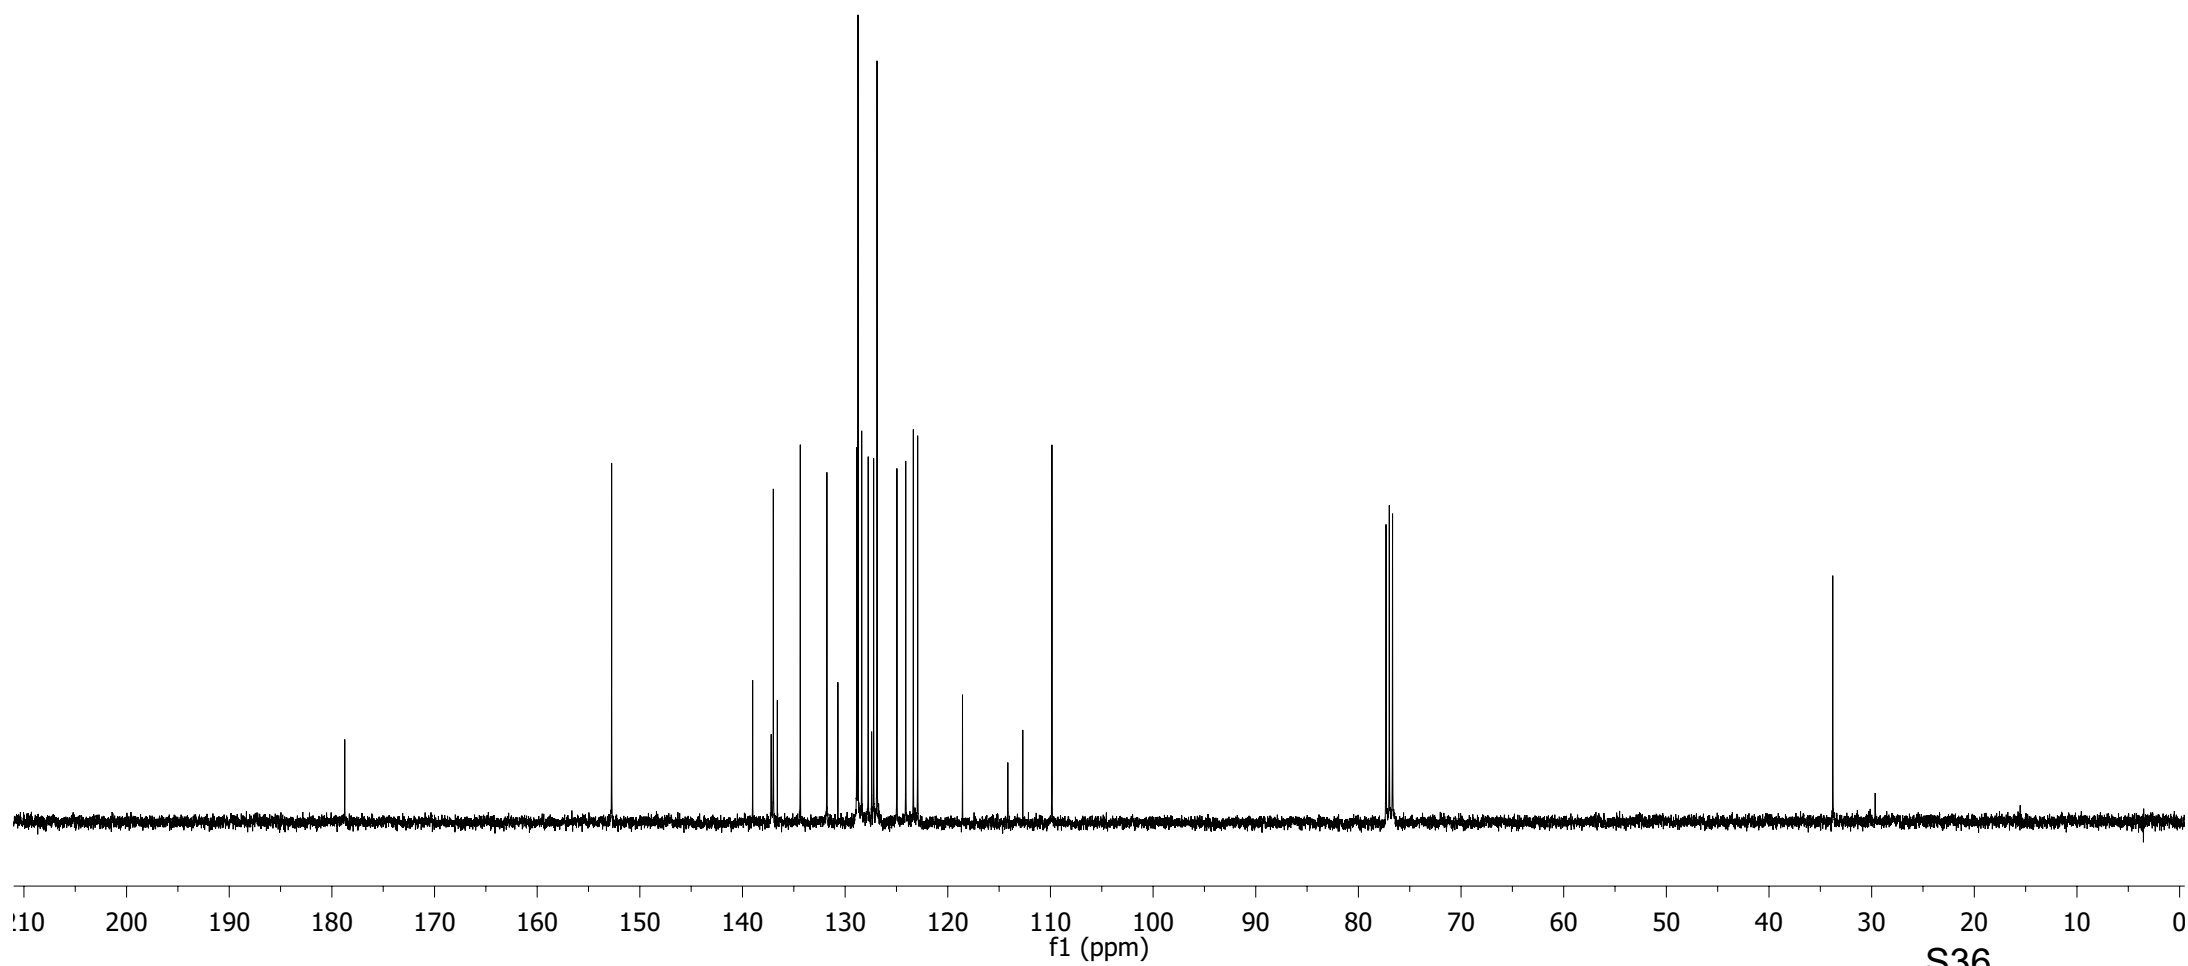

S36



Solvent  $\text{CDCl}_3$   
Spectrometer Frequency 400

8.474  
8.220  
8.217  
8.201  
8.198  
7.911  
7.893  
7.474  
7.464  
7.445  
7.384  
7.357  
6.951  
6.901

8.220  
8.217  
8.201  
8.198  
7.913  
7.911  
7.893  
7.889  
7.669  
7.667  
7.666  
7.649  
7.648  
7.646  
7.603  
7.584  
7.572  
7.568  
7.553  
7.550  
7.533  
7.496  
7.491  
7.487  
7.483  
7.479  
7.474  
7.464  
7.445  
7.426  
7.423  
7.405  
7.402  
7.384  
7.380  
7.369  
7.366  
7.344  
7.340  
7.337  
7.322  
7.267  
7.257  
7.227  
6.941  
6.901

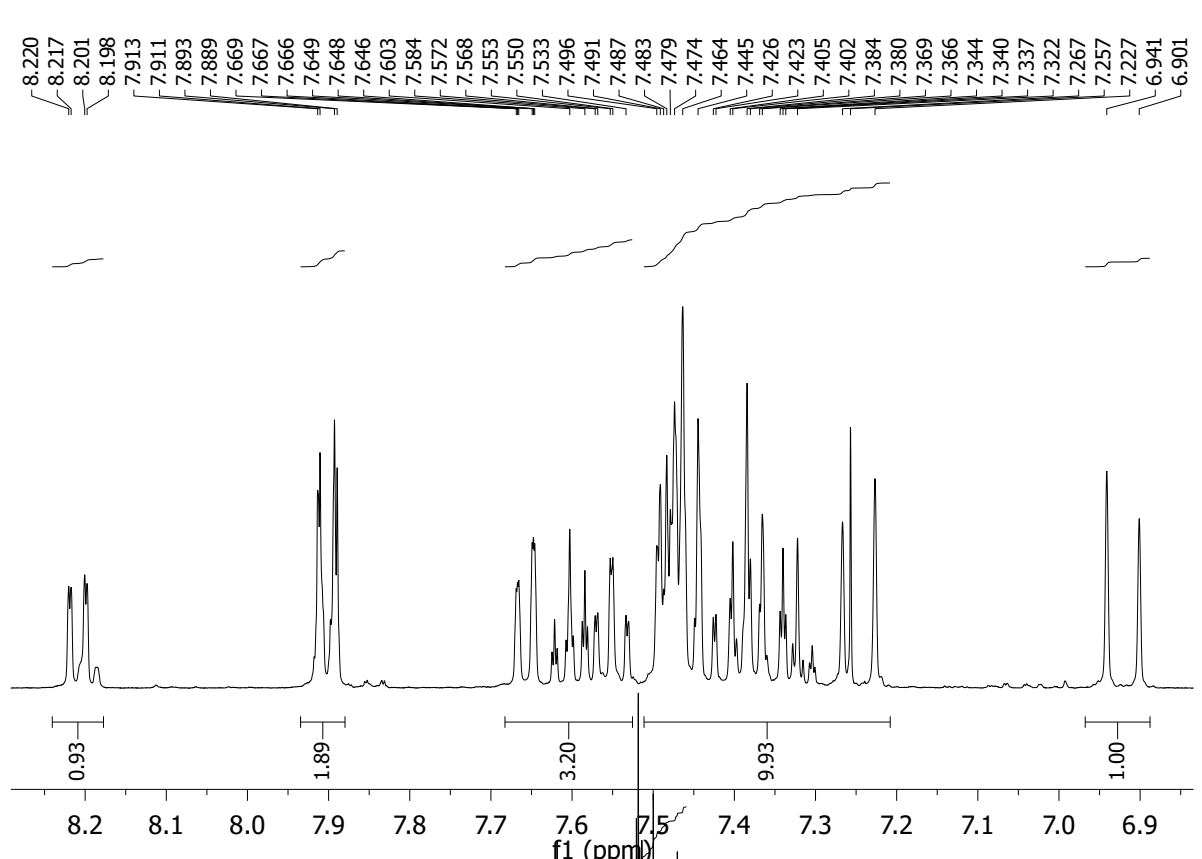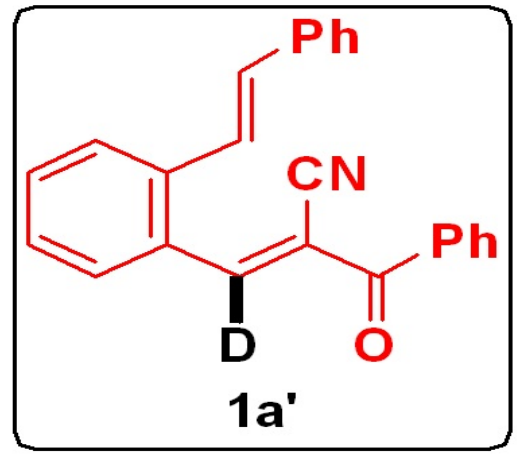

1.580  
1.285  
1.256

0.000

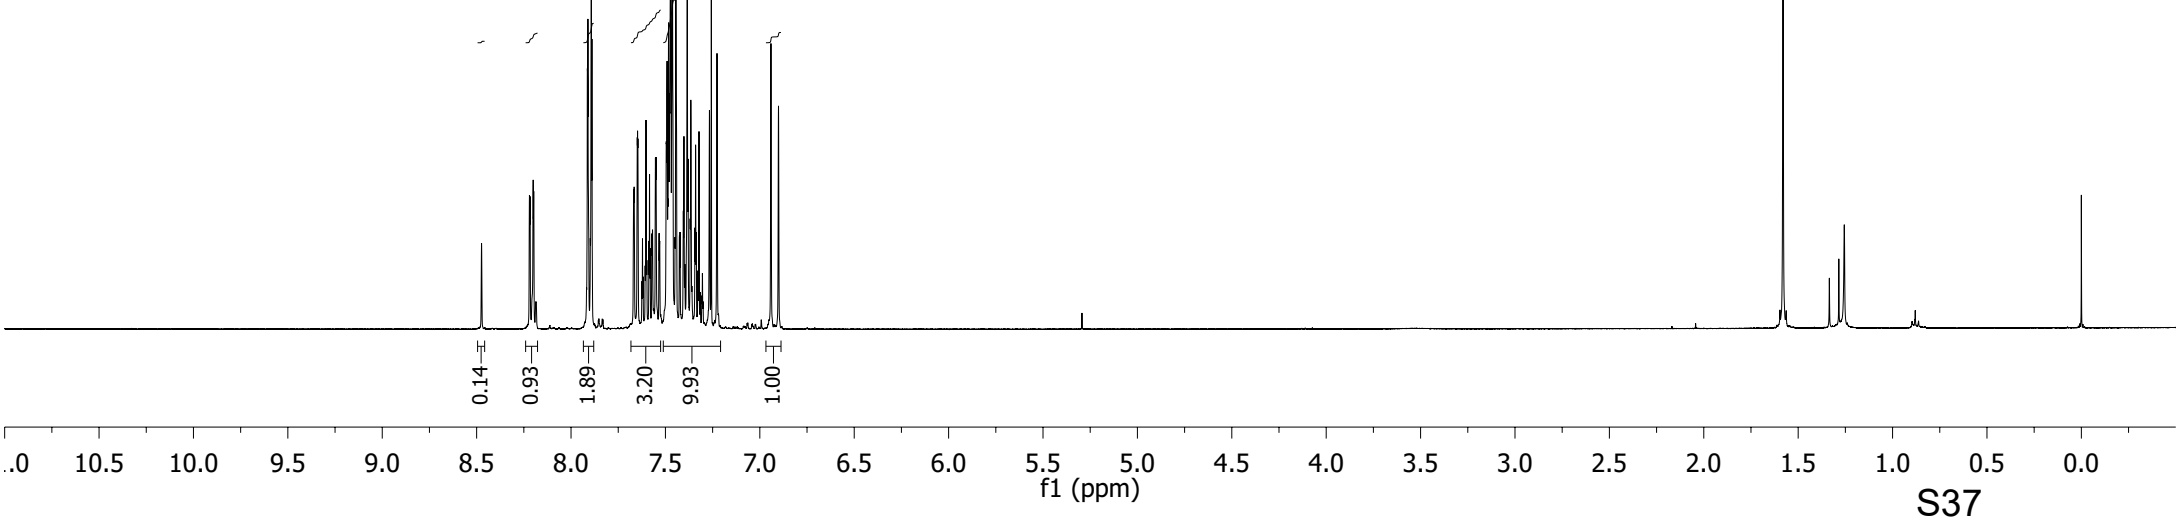

Solvent  $\text{CDCl}_3$   
Spectrometer Frequency 100

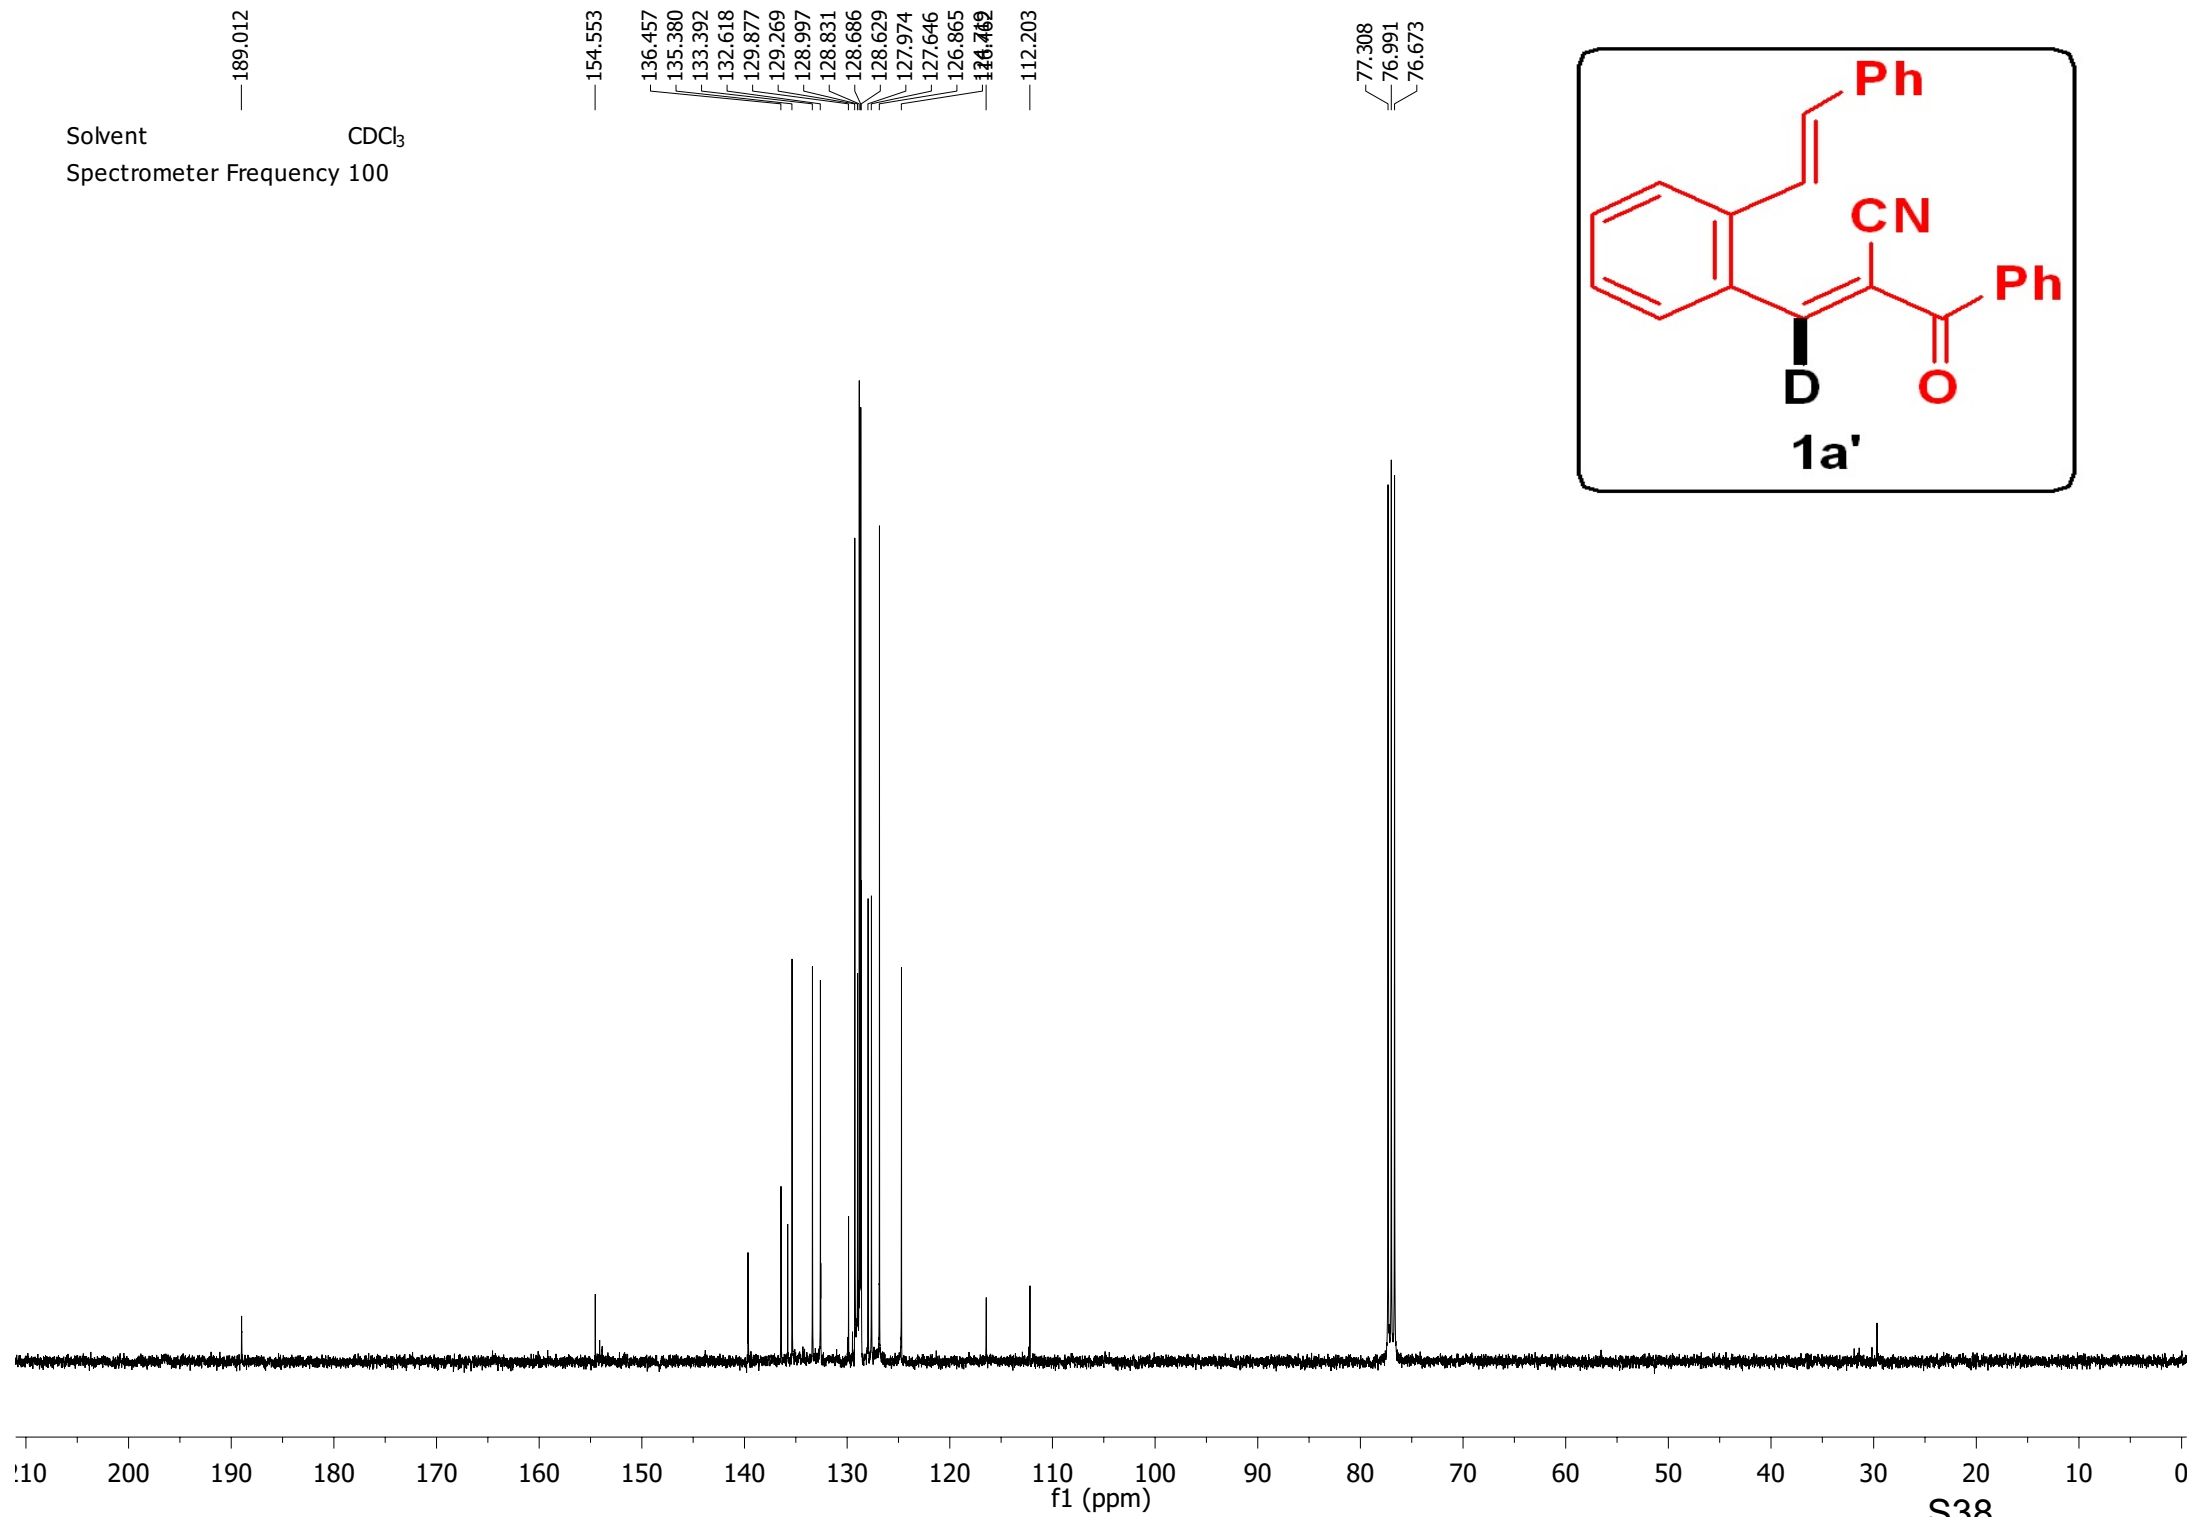

Solvent  $\text{CDCl}_3$   
Spectrometer Frequency 400

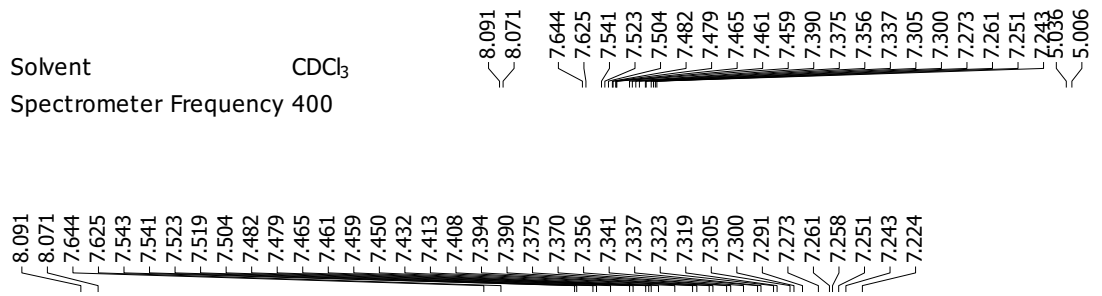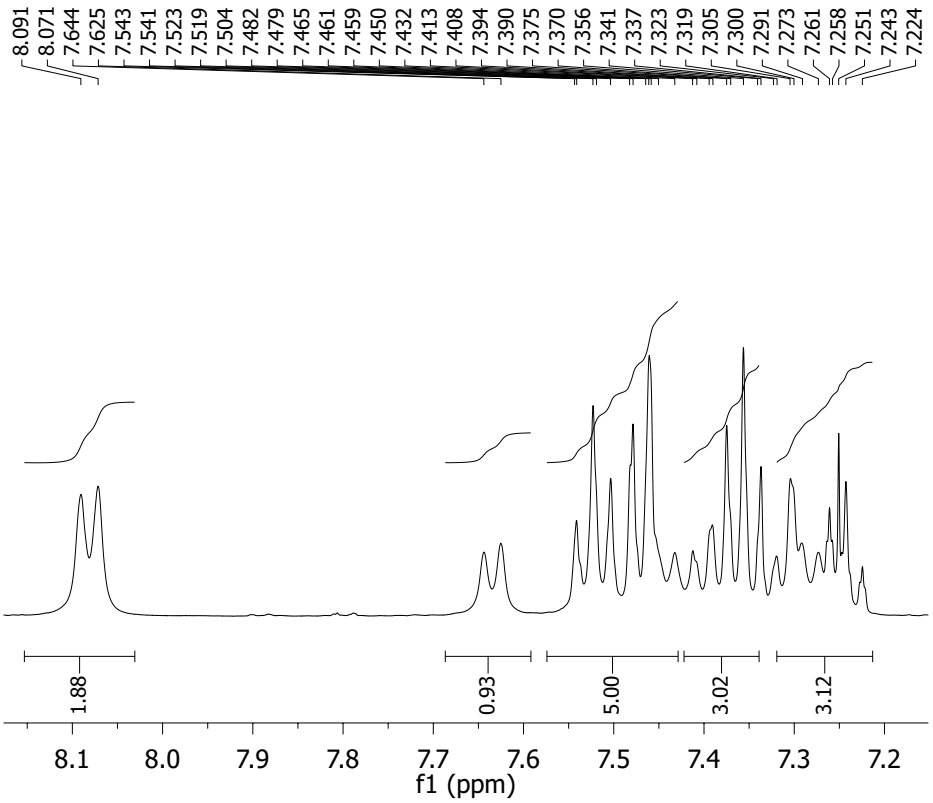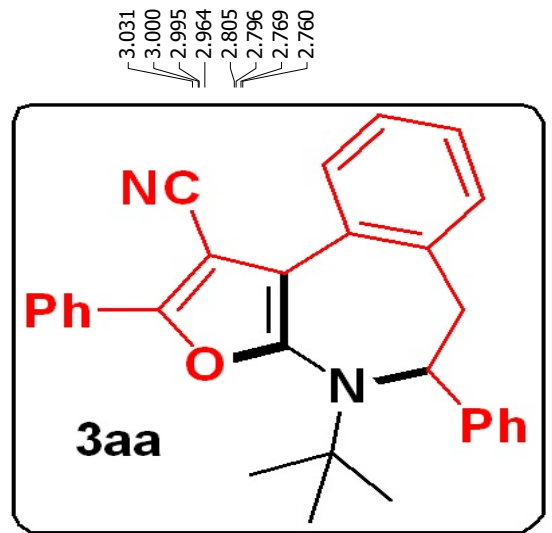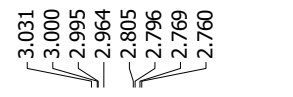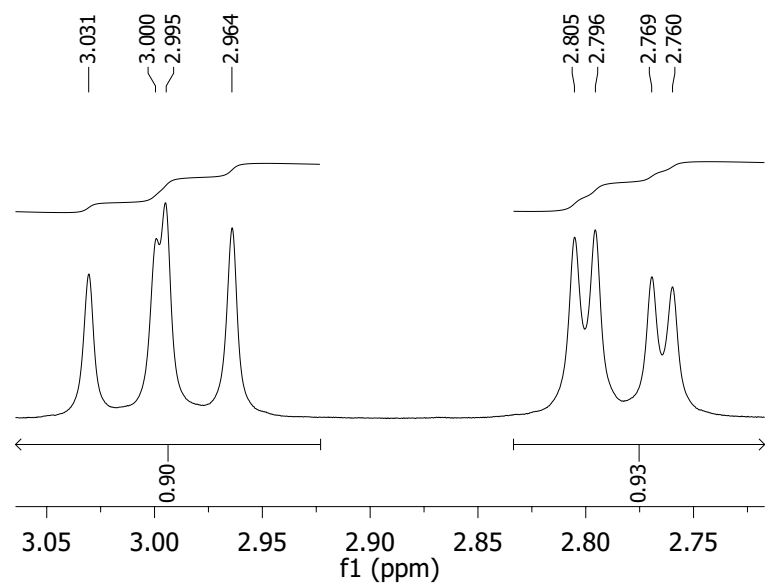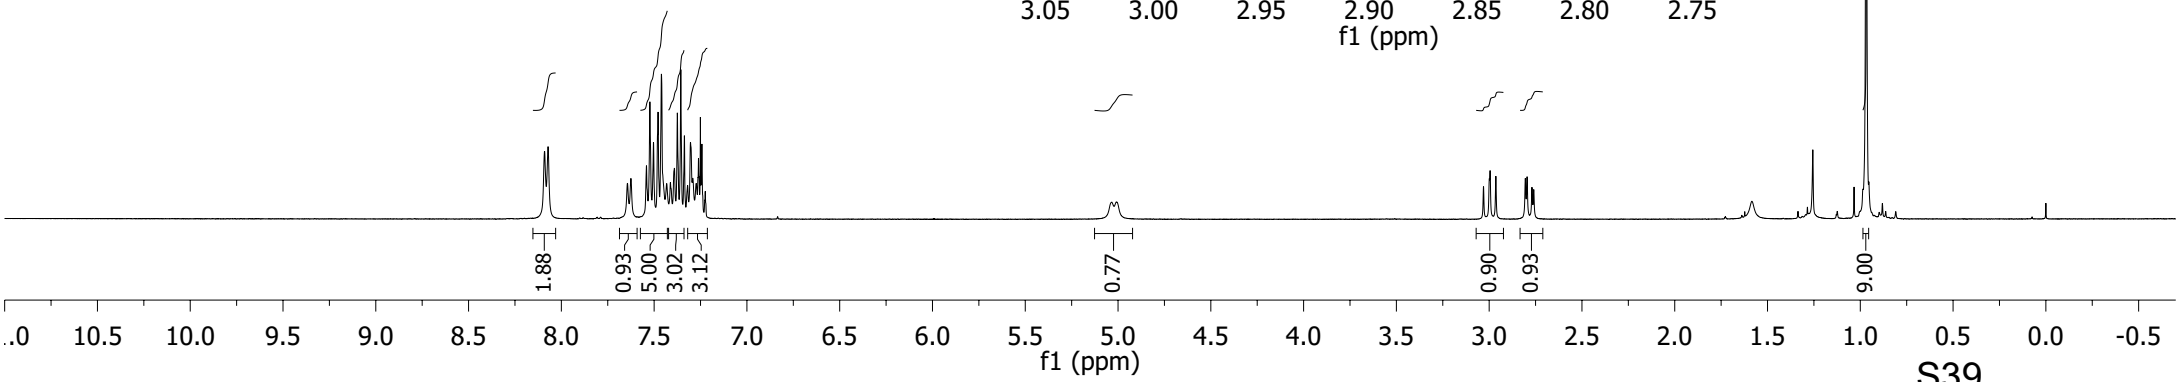

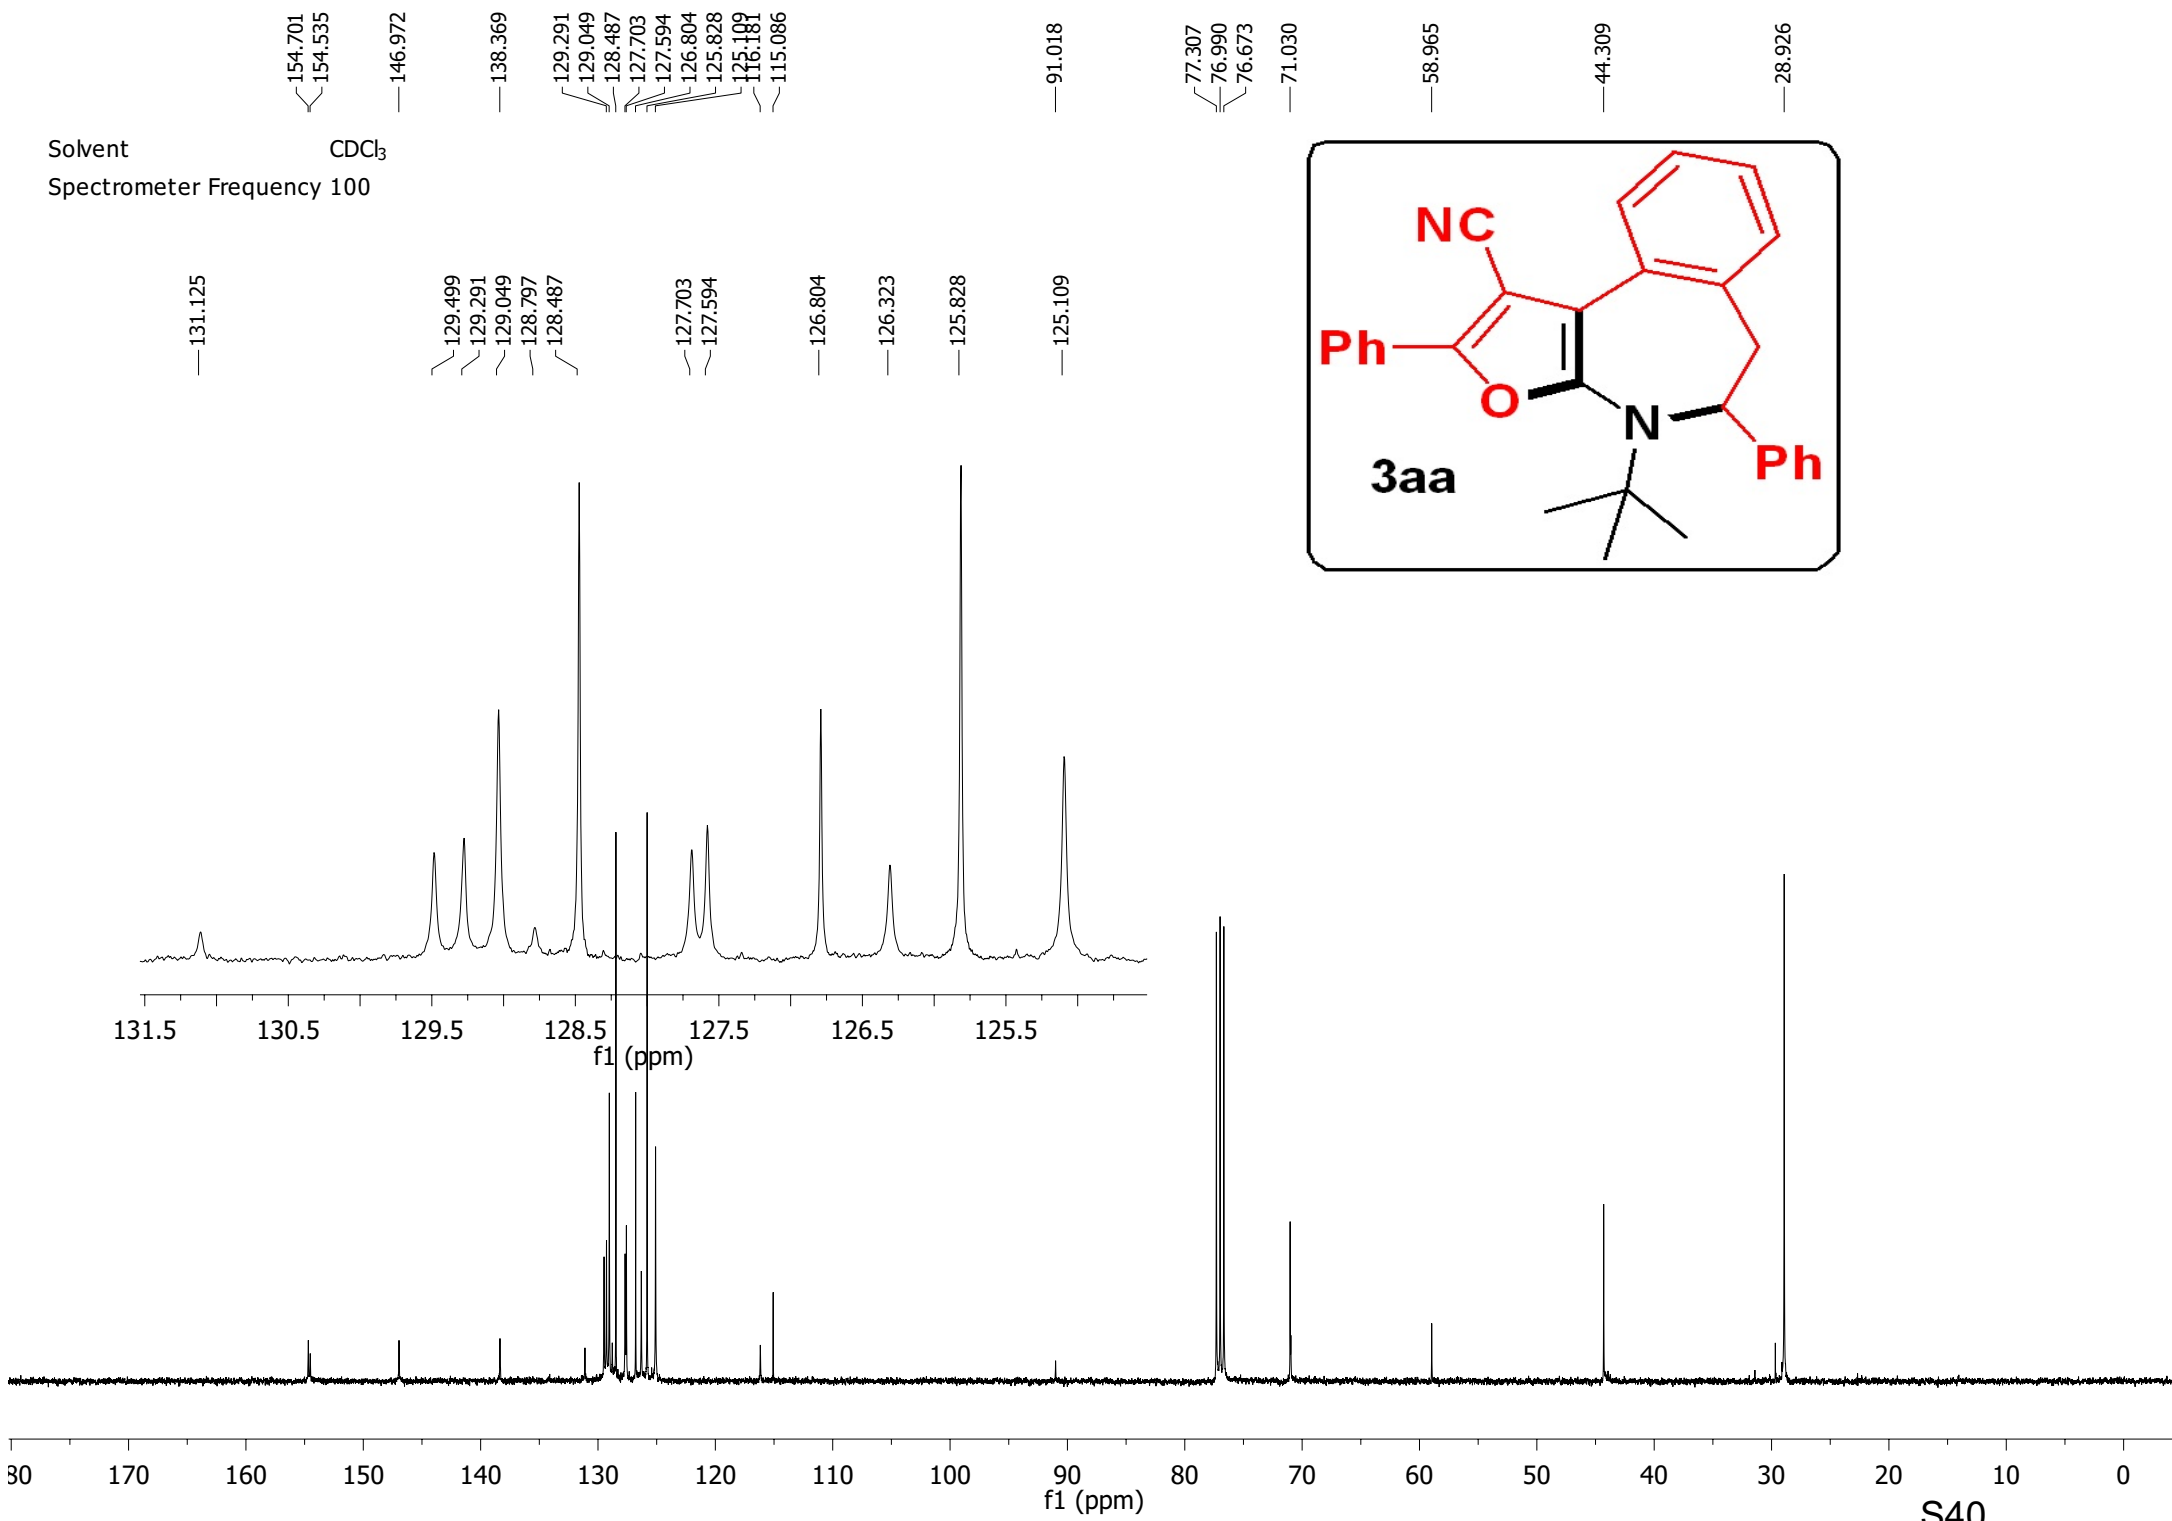

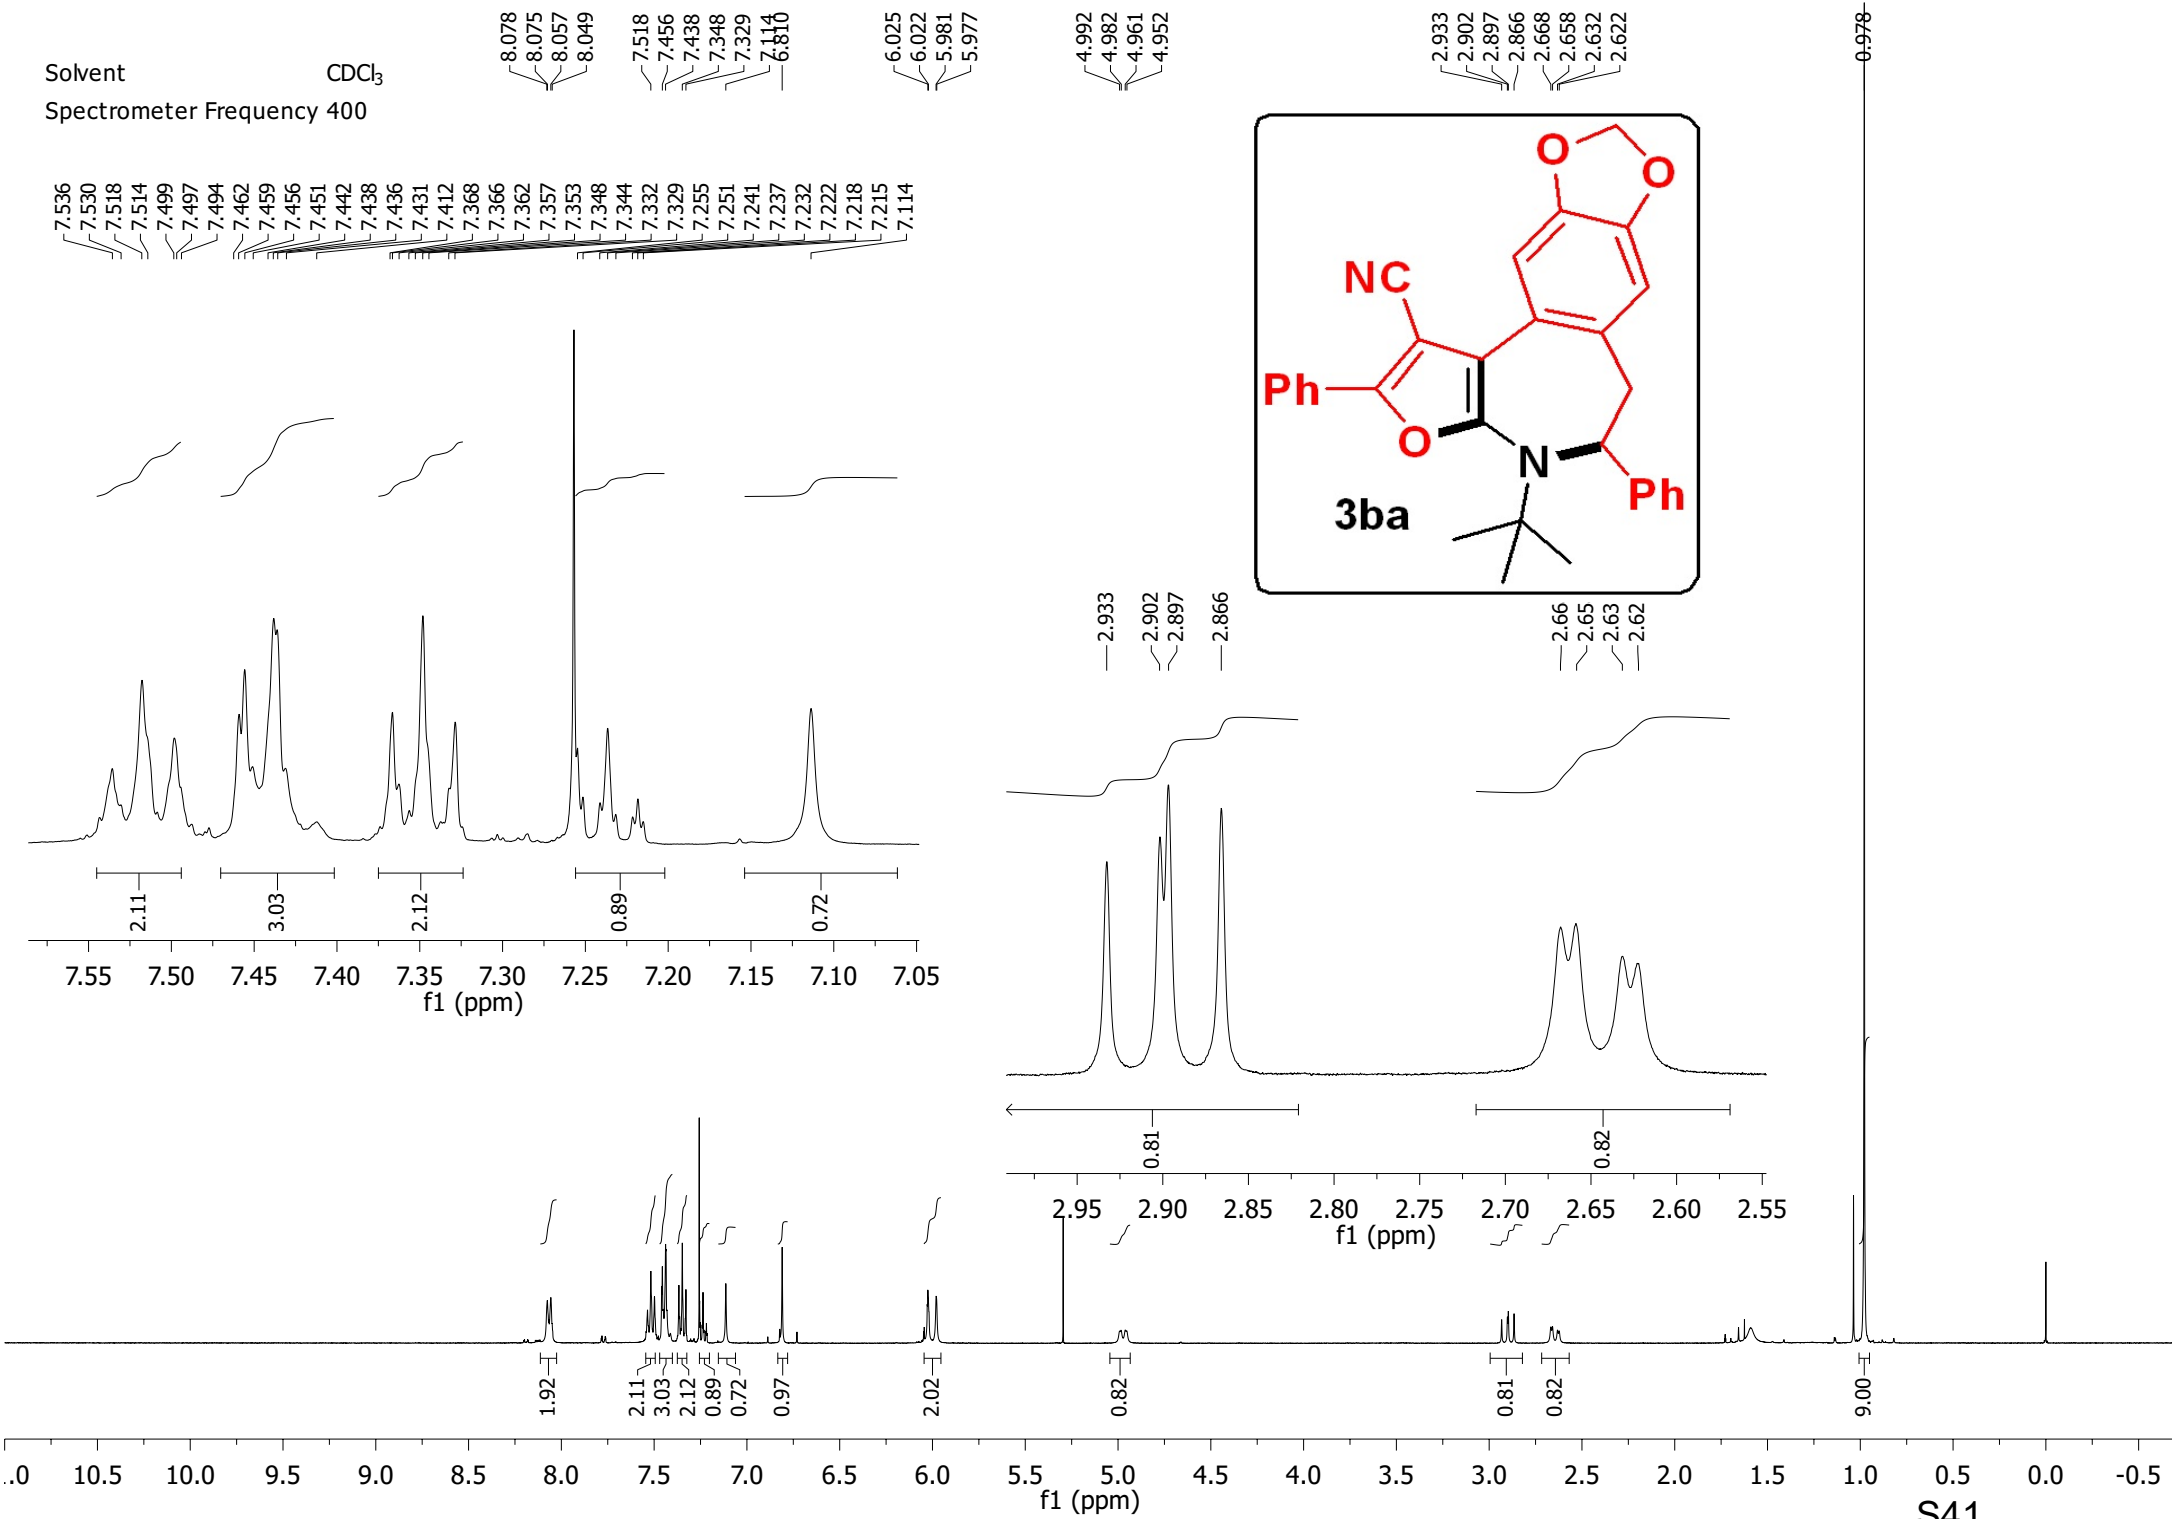

Solvent CDCl<sub>3</sub>  
Spectrometer Frequency 100

154.639  
154.497  
147.060  
146.823  
132.356  
129.500  
129.045  
129.007  
128.487  
126.815  
125.822  
125.104  
124.338  
116.500  
115.062  
109.765  
106.907  
101.211  
90.943  
77.308  
76.991  
76.674  
71.426  
58.813  
44.162  
28.969

154.639  
154.497

147.060  
146.823

132.356  
129.500  
129.045  
129.007  
128.487  
126.815  
125.822  
125.104  
124.338

116.500  
115.062

109.765  
106.907

101.211

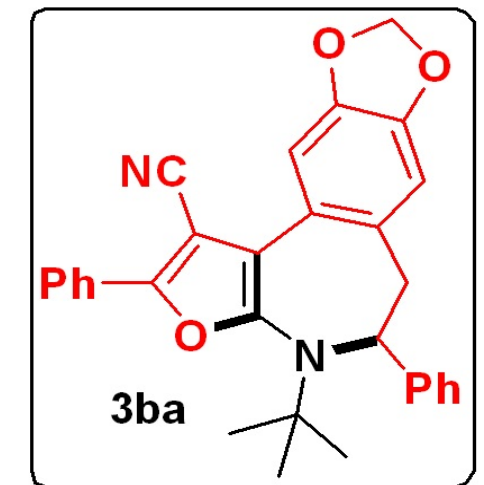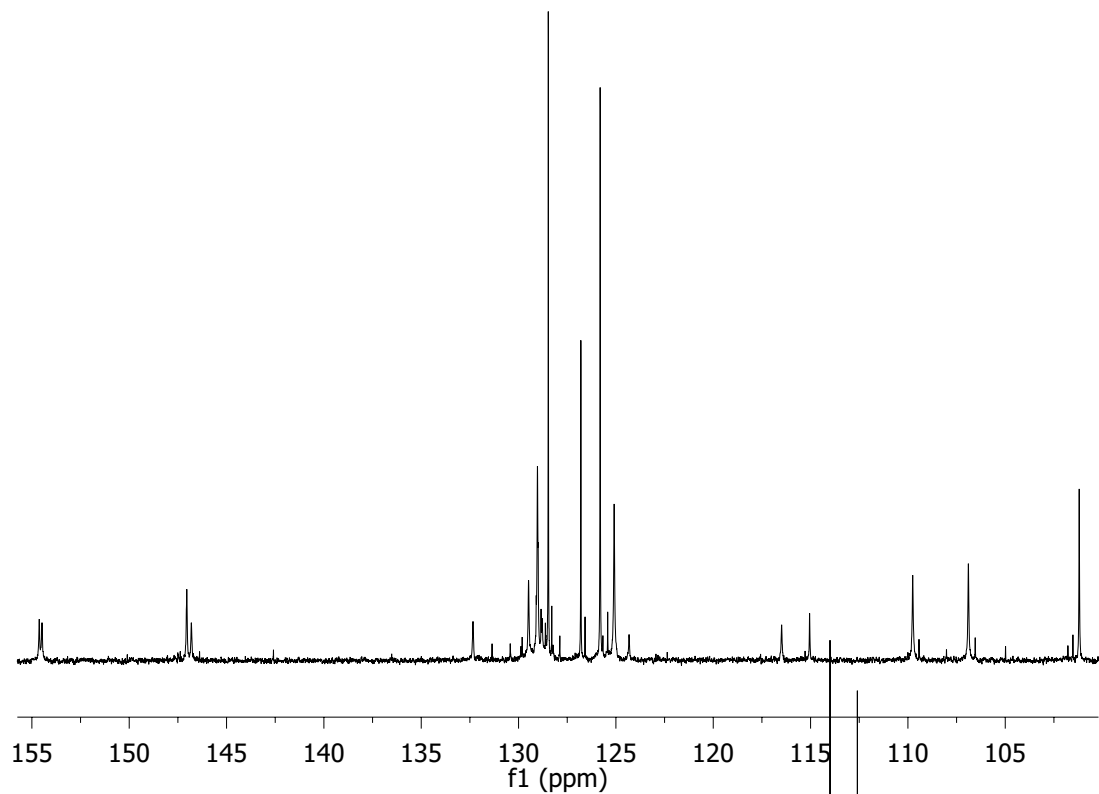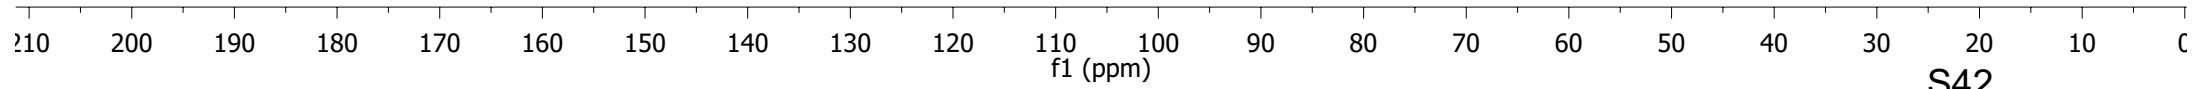

Solvent CDCl<sub>3</sub>  
Spectrometer Frequency 597

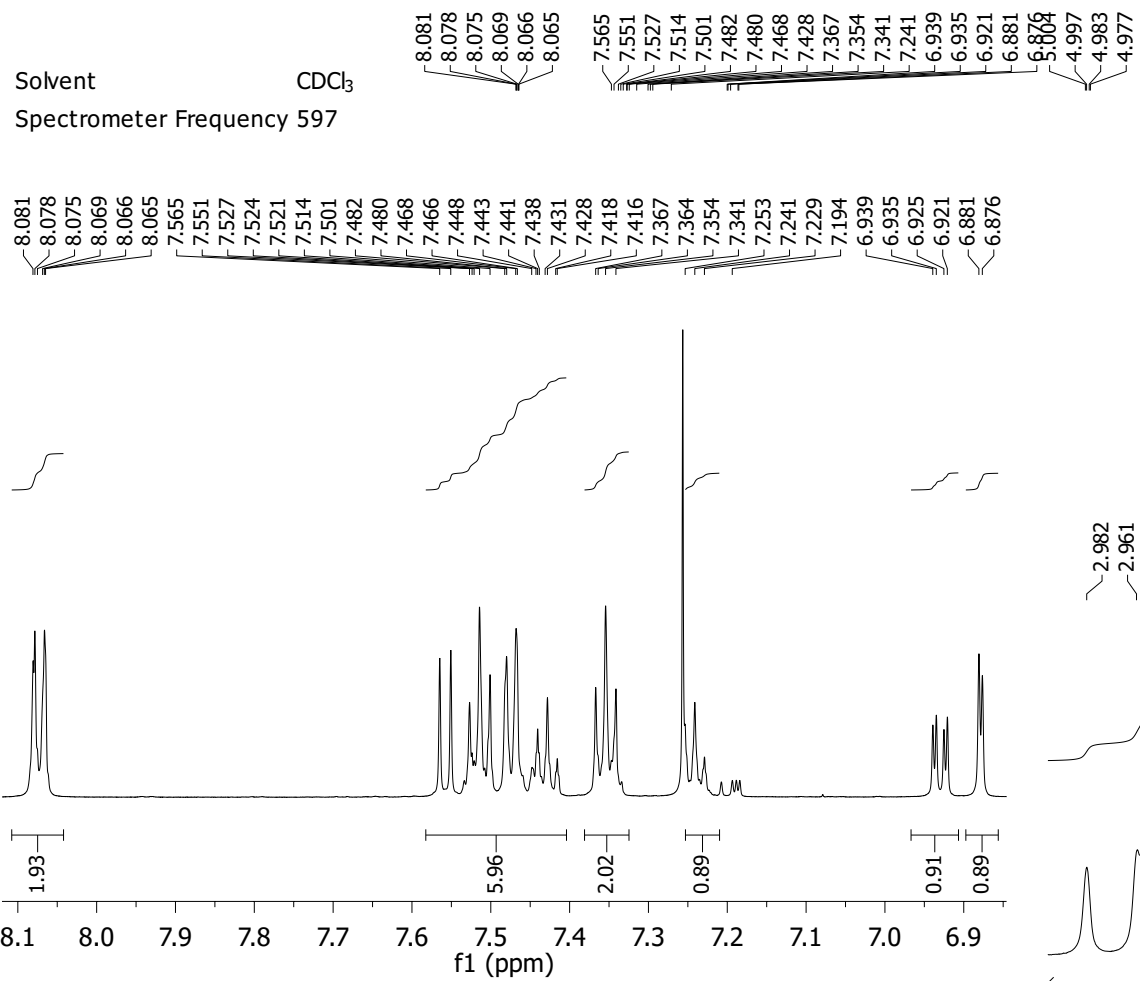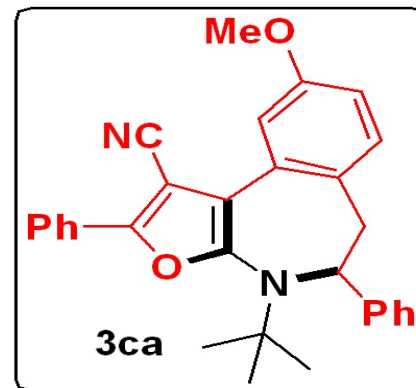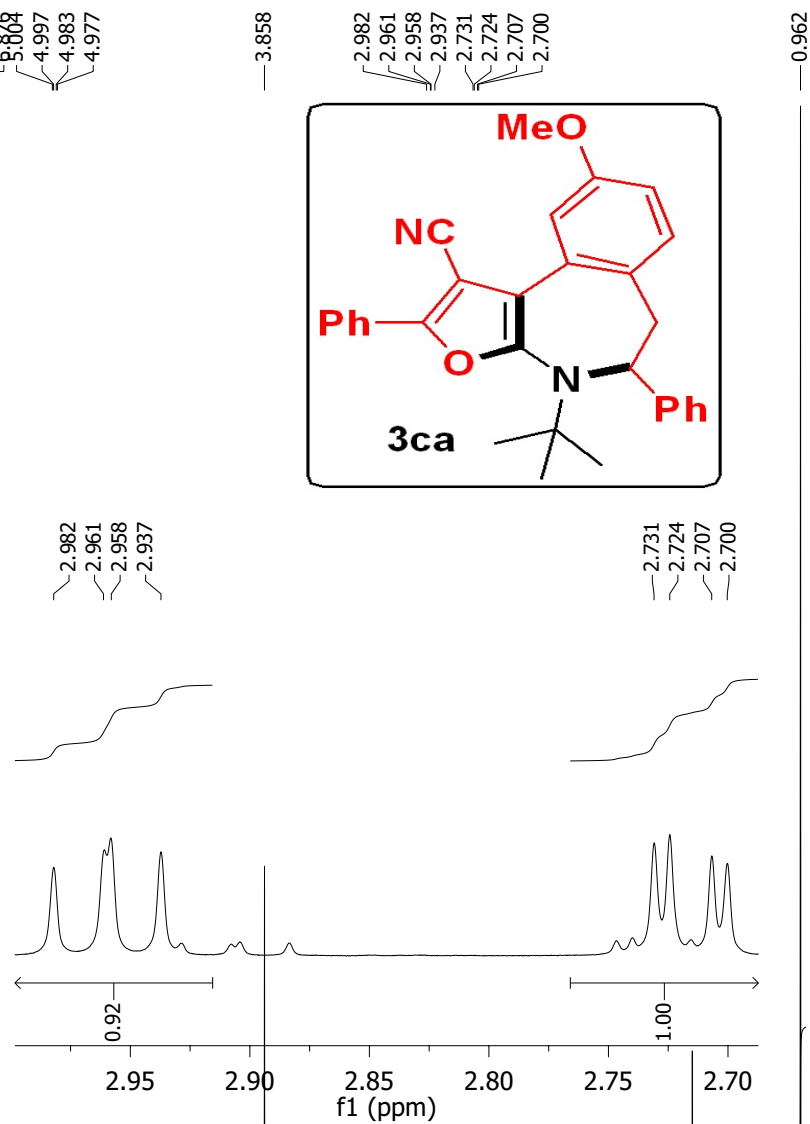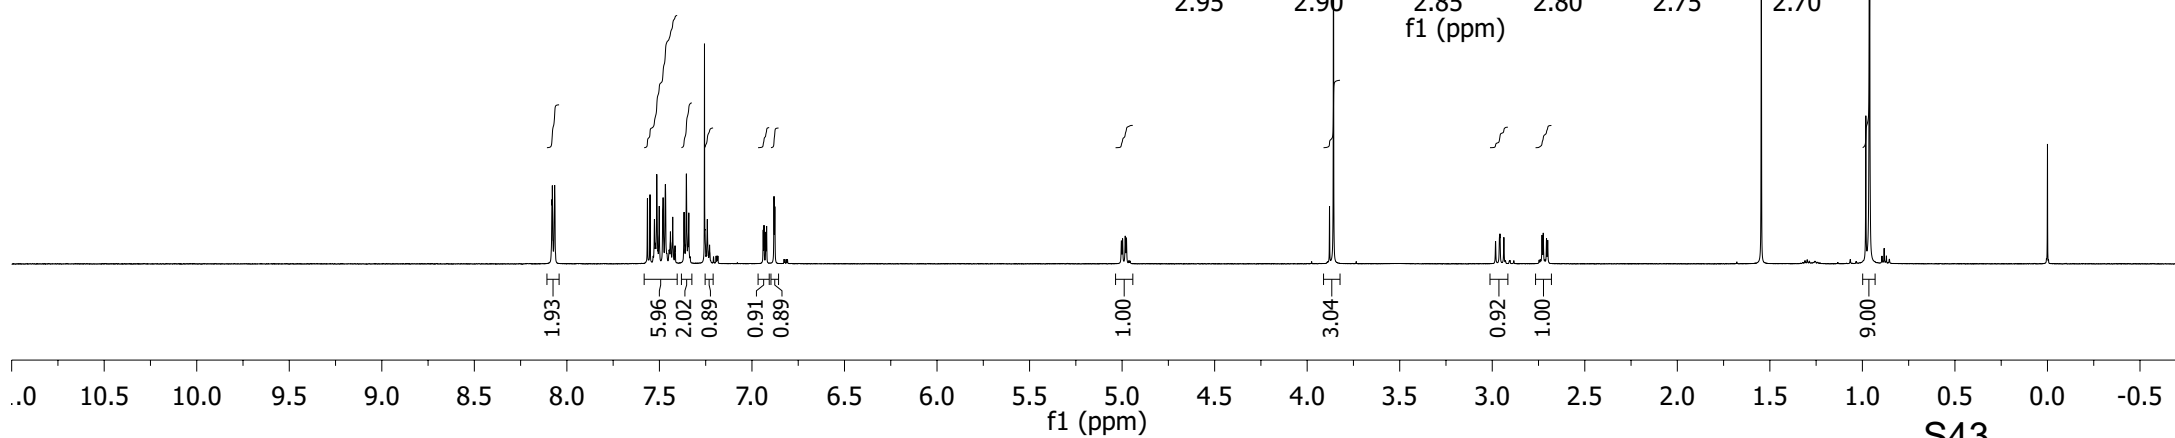

Solvent  $\text{CDCl}_3$   
Spectrometer Frequency 150

—159.138  
—154.554  
—154.152  
—147.047  
—139.994  
—129.419  
—129.038  
—128.490  
—127.466  
—126.793  
—125.849  
—125.091  
—123.523  
—116.402  
—115.469  
—115.203  
—112.413

—159.138  
—154.554  
—154.152  
—147.047  
—139.994

—129.419  
—129.038  
—128.914  
—128.490  
—127.466  
—126.793  
—125.849  
—125.091  
—123.523  
—116.402  
—115.469  
—115.203  
—112.413

—91.095

—77.202  
—76.990  
—76.777  
—70.618

—58.899  
—55.340

—44.515

—28.912

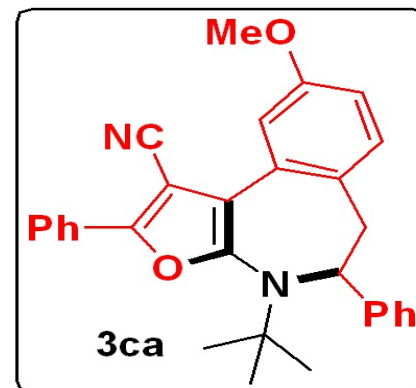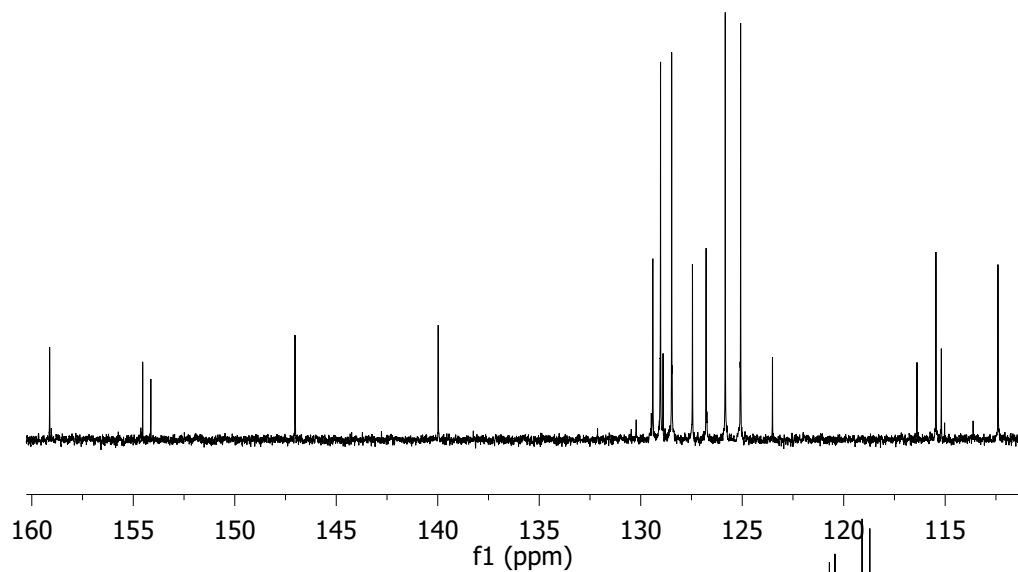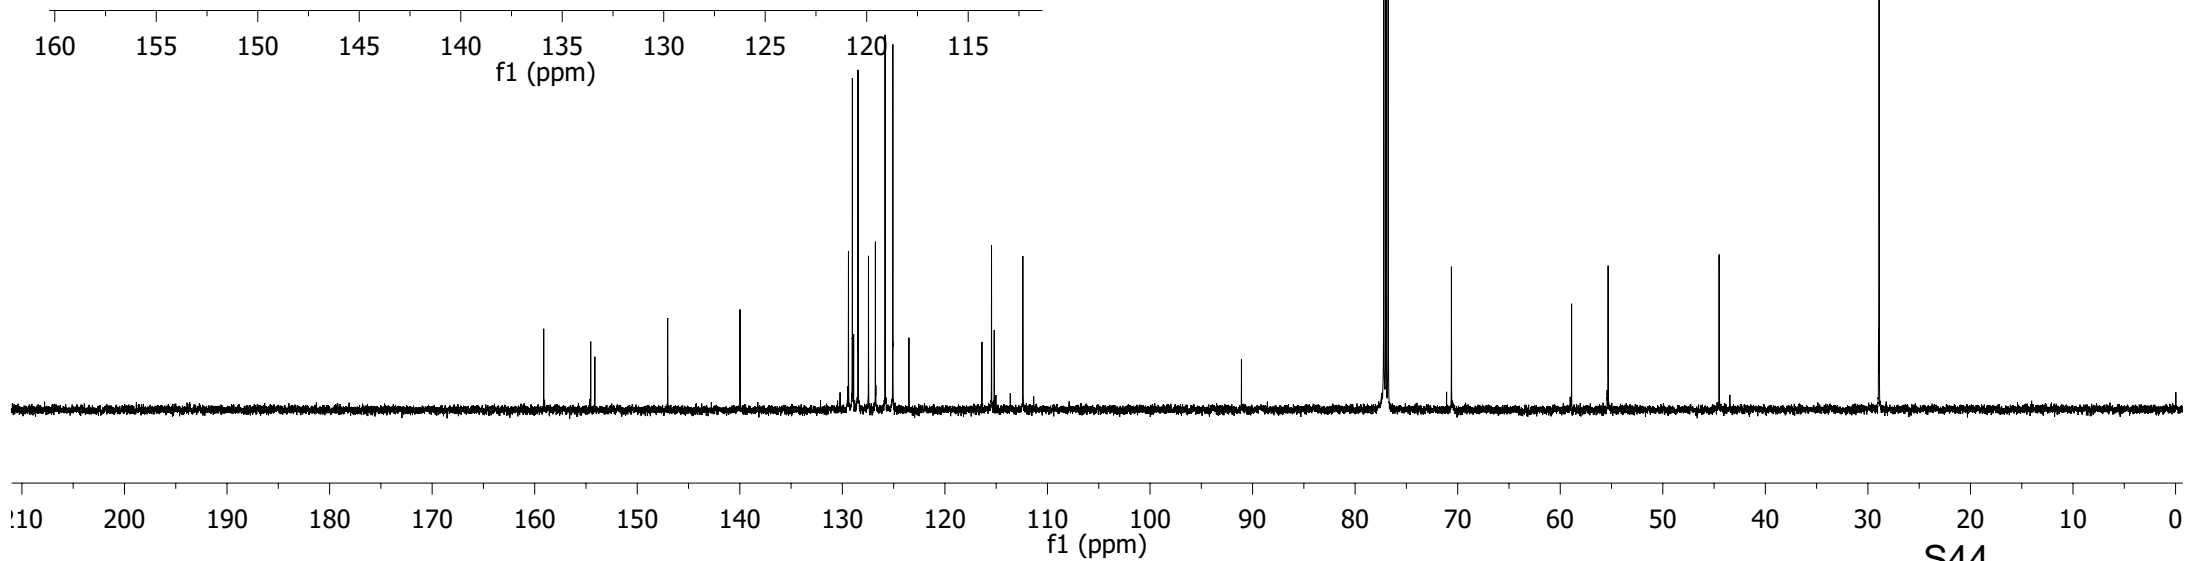



Solvent  $\text{CDCl}_3$   
Spectrometer Frequency 597

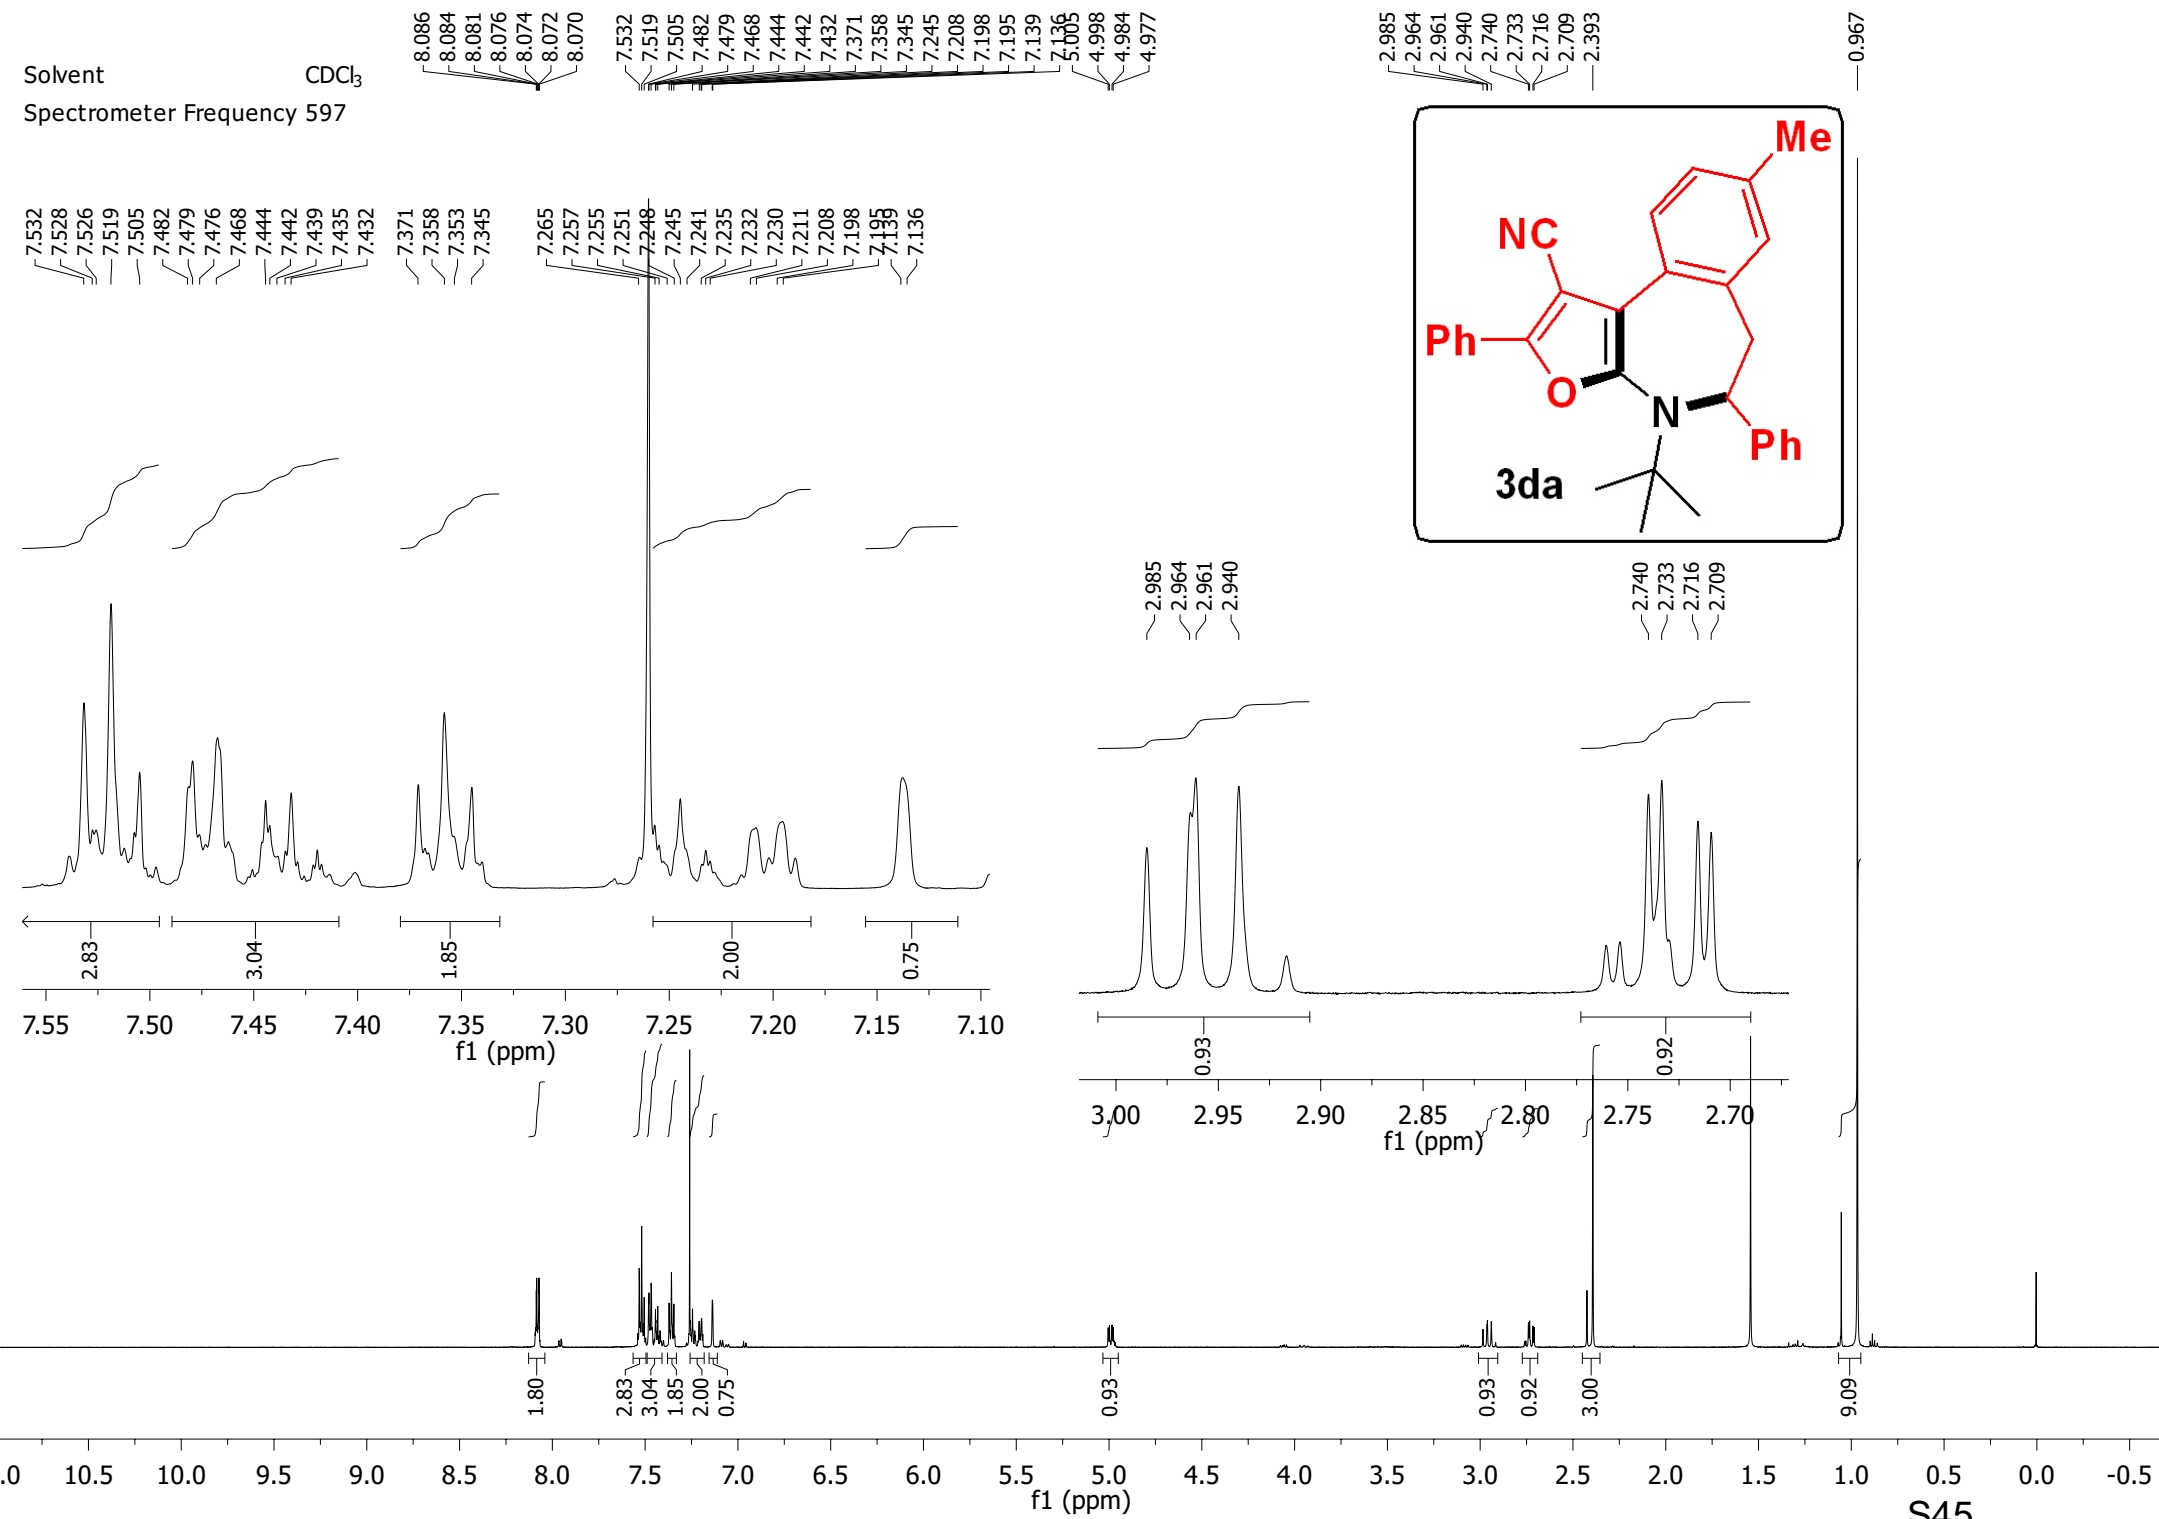

Solvent  $\text{CDCl}_3$   
Spectrometer Frequency 150

154.585  
154.431  
147.145  
138.324  
137.551  
129.042  
128.486  
128.263  
126.769  
126.769  
126.172  
125.854  
116.455  
115.142

130.107  
129.422  
129.130  
129.042  
128.906  
128.892  
128.486  
128.263  
127.963  
126.965  
126.912  
126.897  
126.769  
126.172  
125.854  
125.103

130.0 129.5 129.0 128.5 128.0 127.5 127.0 126.5 126.0 125.5 125.0  
f1 (ppm)

91.114  
77.204  
76.992  
76.779  
58.953  
44.350  
28.949  
21.338

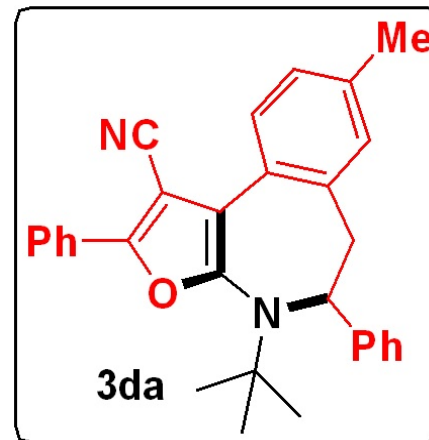

210 200 190 180 170 160 150 140 130 120 110 100 90 80 70 60 50 40 30 20 10 0  
f1 (ppm)

Solvent  $\text{CDCl}_3$   
Spectrometer Frequency 597

8.079  
8.077  
8.065  
7.534  
7.524  
7.522  
7.511  
7.508  
7.456  
7.453  
7.451  
7.444  
7.440  
7.428  
7.368  
7.360  
7.355  
7.351  
7.347  
7.342  
7.335  
7.332  
7.260  
7.254  
7.250  
7.248  
7.245  
7.241  
7.231  
7.090  
7.086  
7.053  
7.038

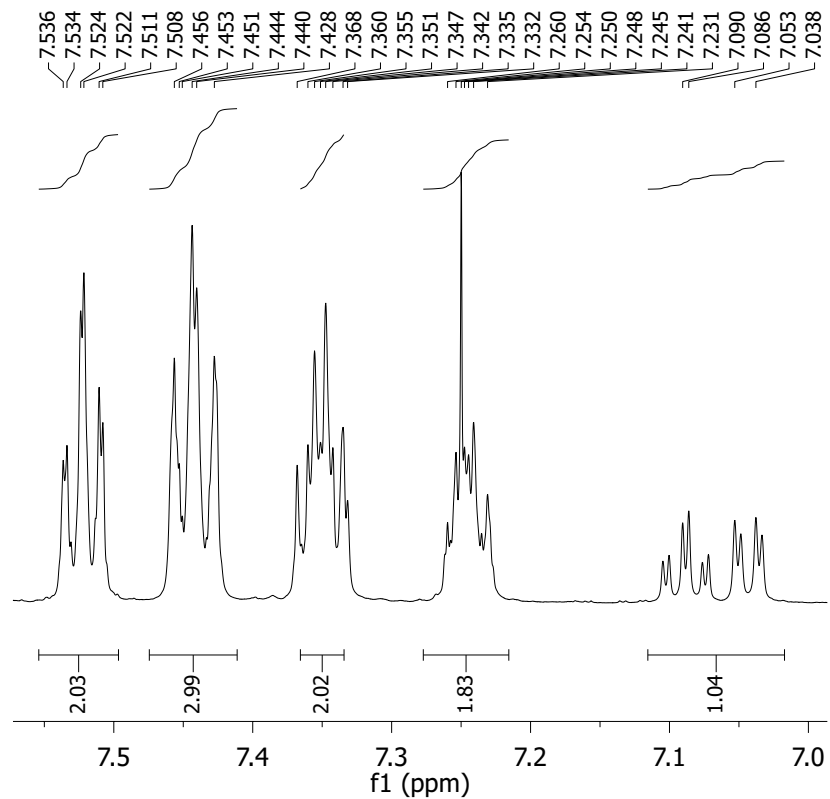

3.003  
2.982  
2.979  
2.965  
2.958  
2.941  
2.921  
2.795  
2.788  
2.770  
2.762  
2.755  
2.737  
2.731

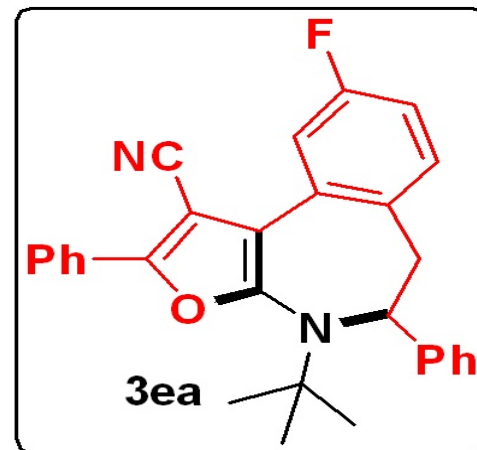

3.003  
2.982  
2.979  
2.965  
2.958  
2.941  
2.921

2.795  
2.788  
2.770  
2.762  
2.755  
2.737  
2.731

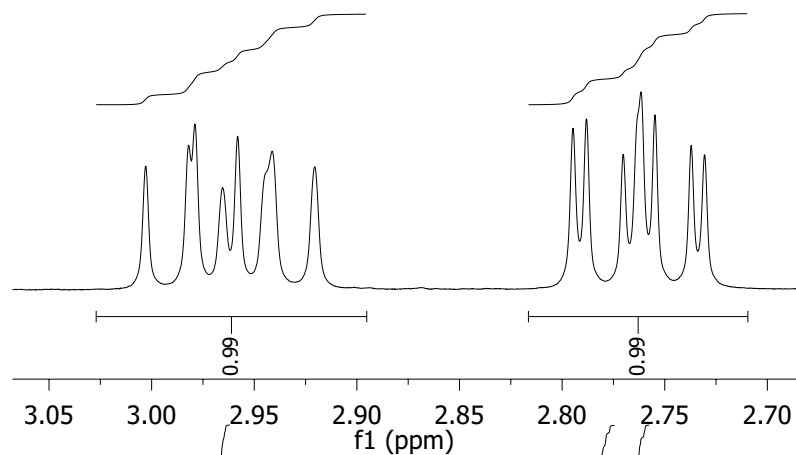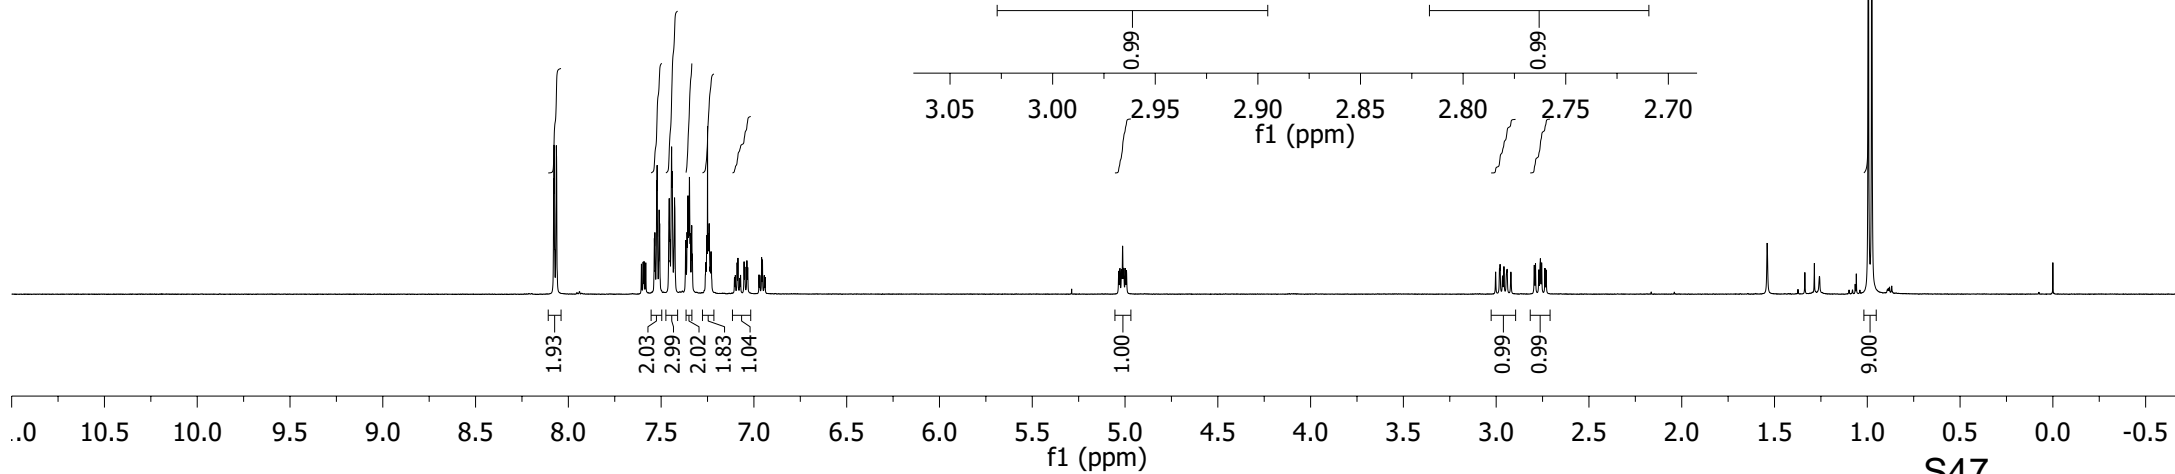

Solvent  $\text{CDCl}_3$   
Spectrometer Frequency 150

162.967  
162.797  
161.330  
161.150  
154.787  
154.342  
146.583  
146.548  
140.729  
140.679  
129.090  
129.075  
128.554  
128.523  
125.779  
125.112  
125.106  
116.437  
116.293  
115.381  
114.933  
114.689  
114.560  
114.415  
114.393  
114.251  
113.308  
113.157  
90.931  
90.817

77.204  
76.992  
76.779  
70.994  
70.677  
59.067  
58.971  
44.164  
43.498  
28.984  
28.933

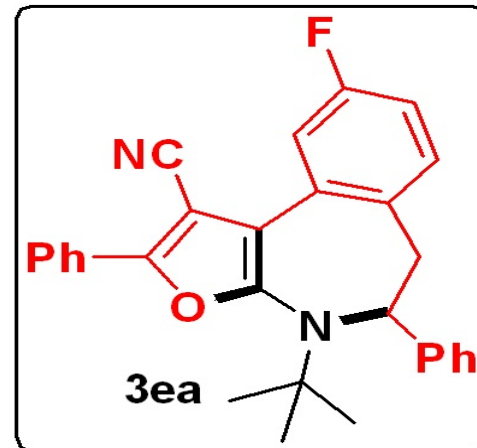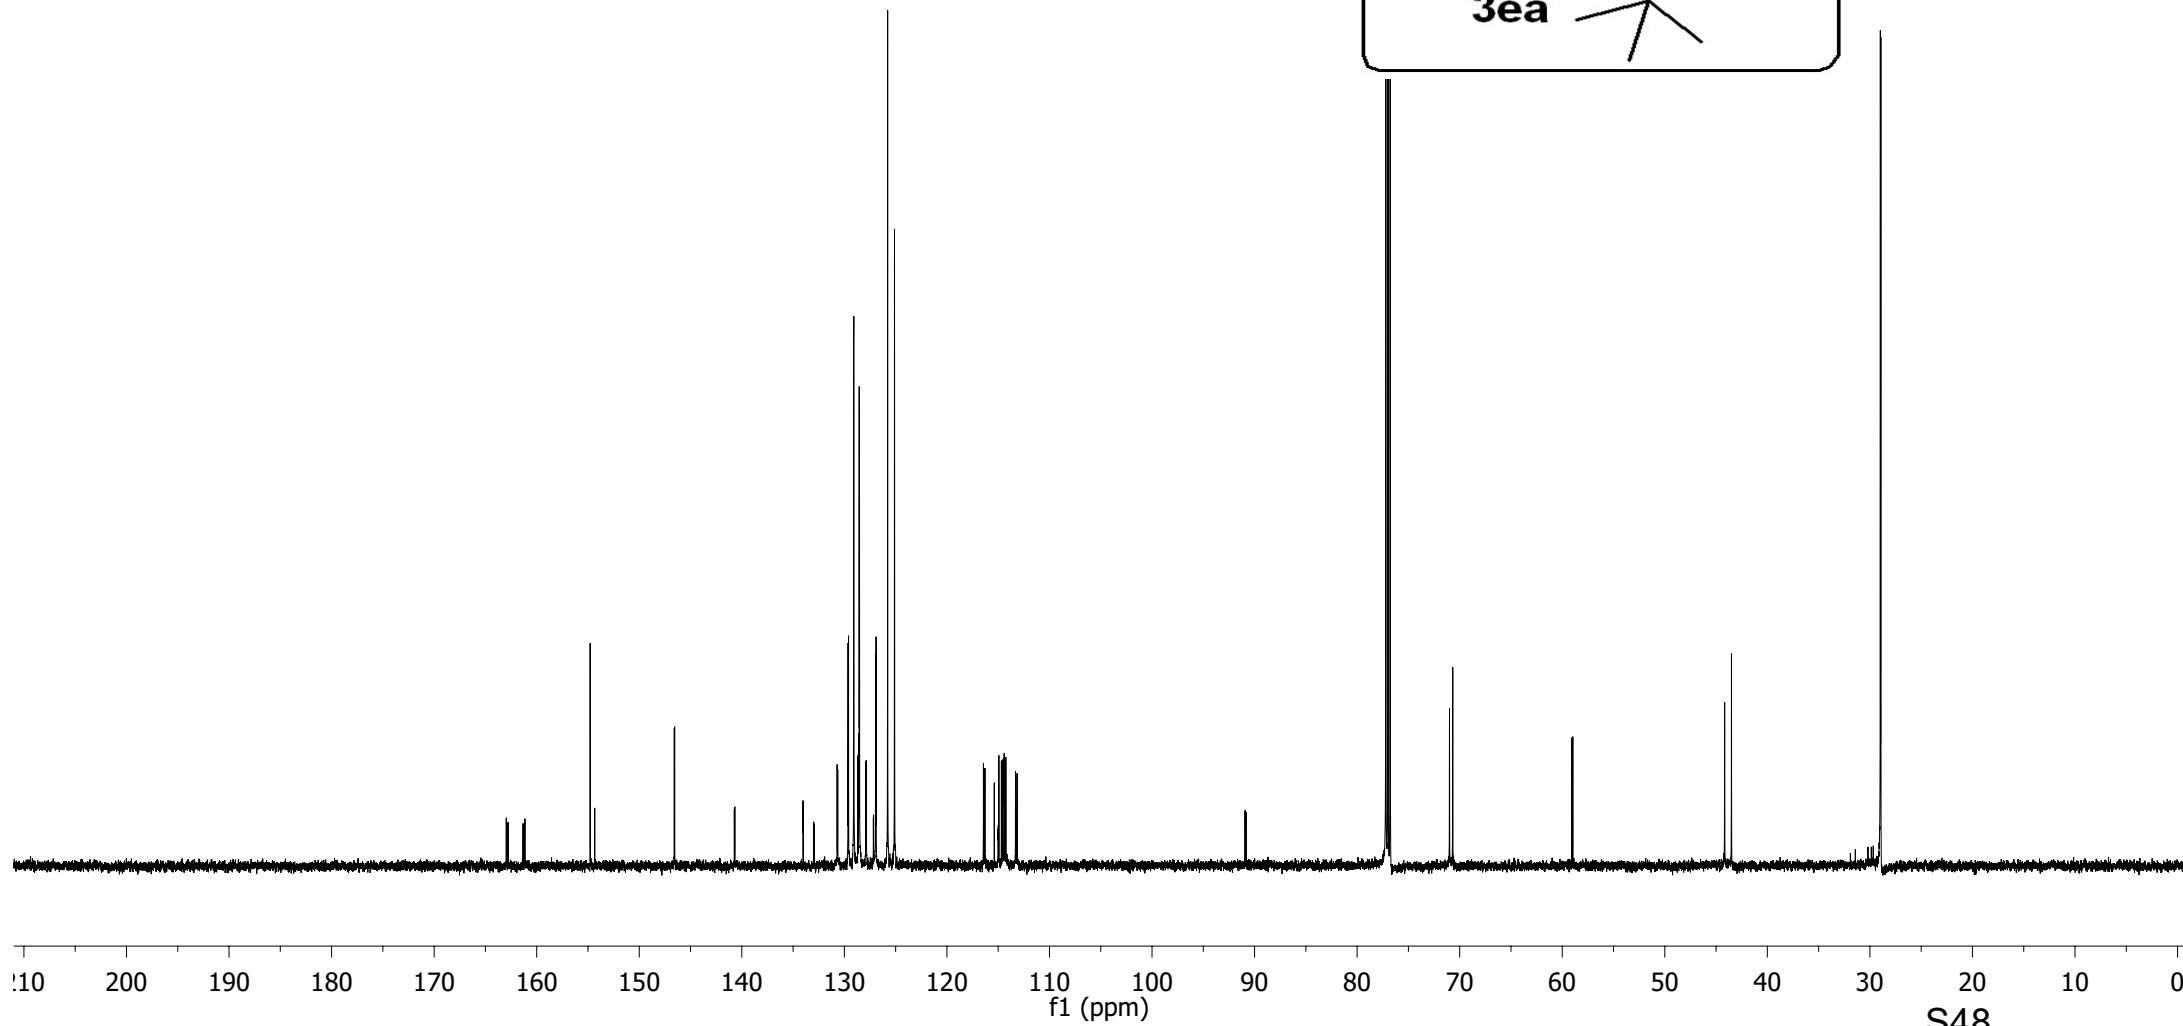

S48

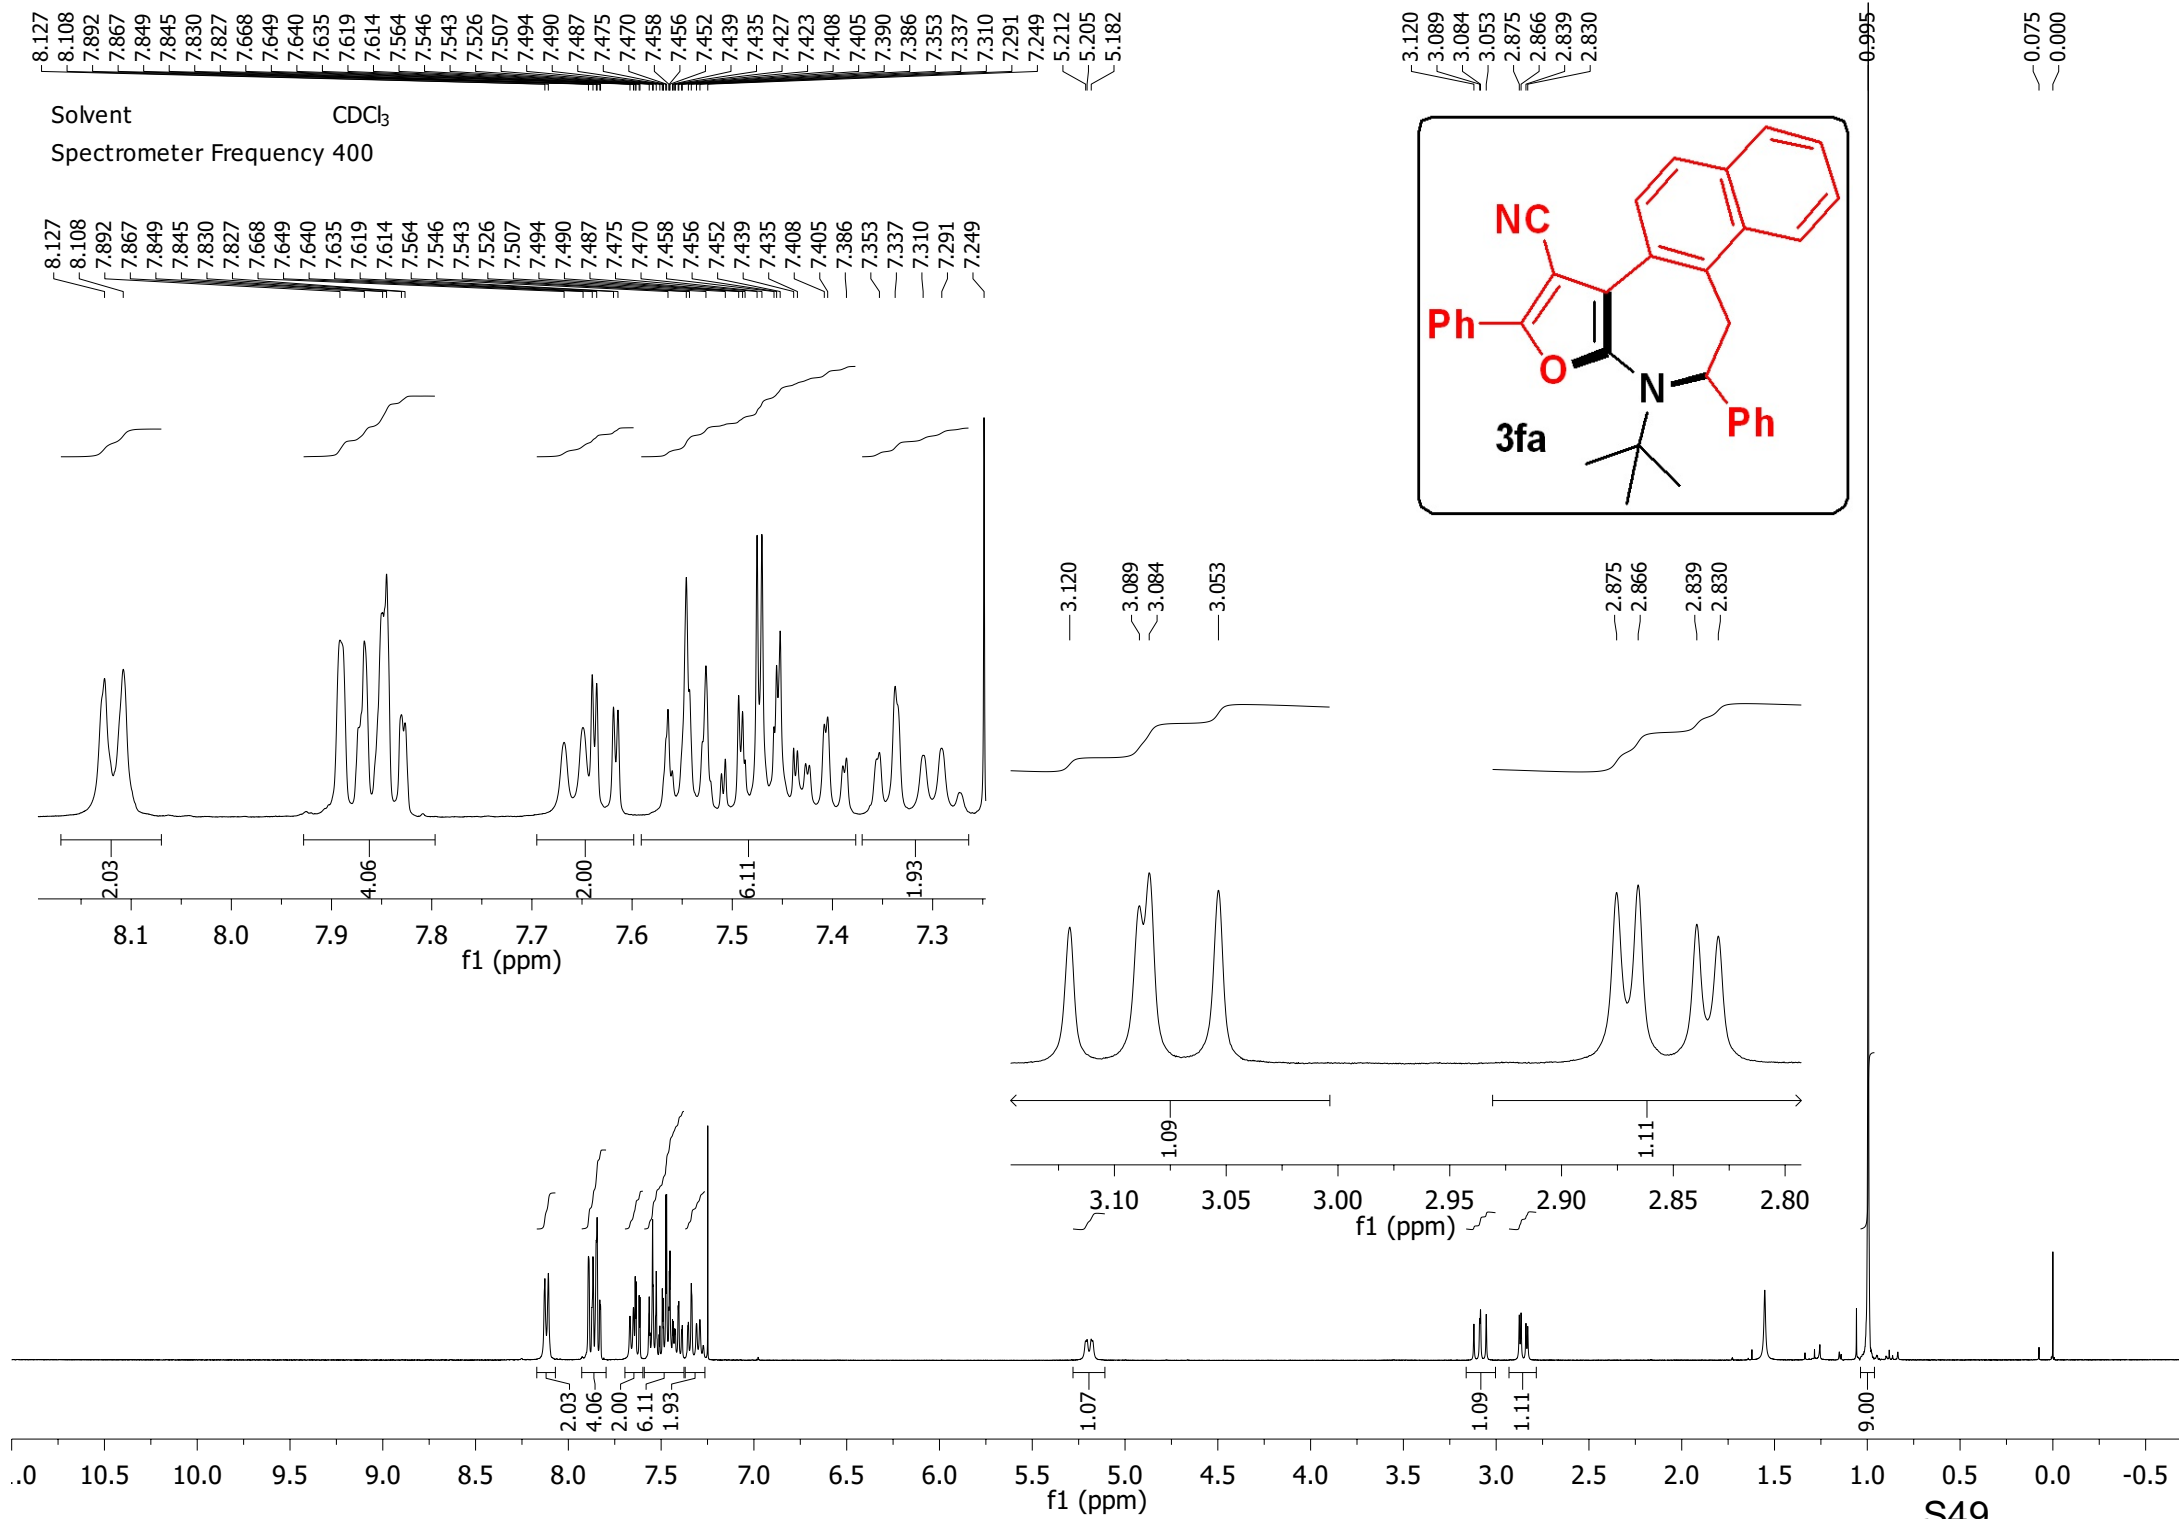

Solvent  $\text{CDCl}_3$   
Spectrometer Frequency 100

154.765  
154.561  
144.437  
129.336  
129.098  
128.388  
127.849  
127.719  
126.097  
125.604  
125.123  
124.479  
124.158  
116.227  
115.081

91.089

71.207

59.087

44.222

28.987

133.439

132.638

131.136

129.535

129.336

129.098

128.838

128.388

127.849

127.754

127.719

127.651

126.367

126.097

125.604

125.123

124.479

124.158

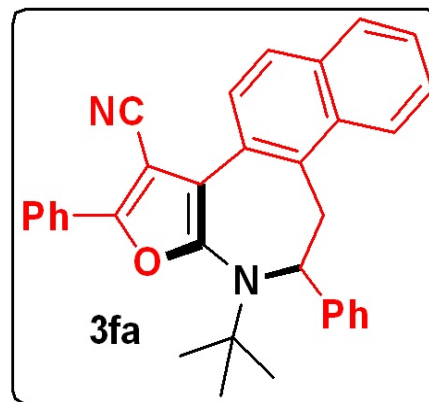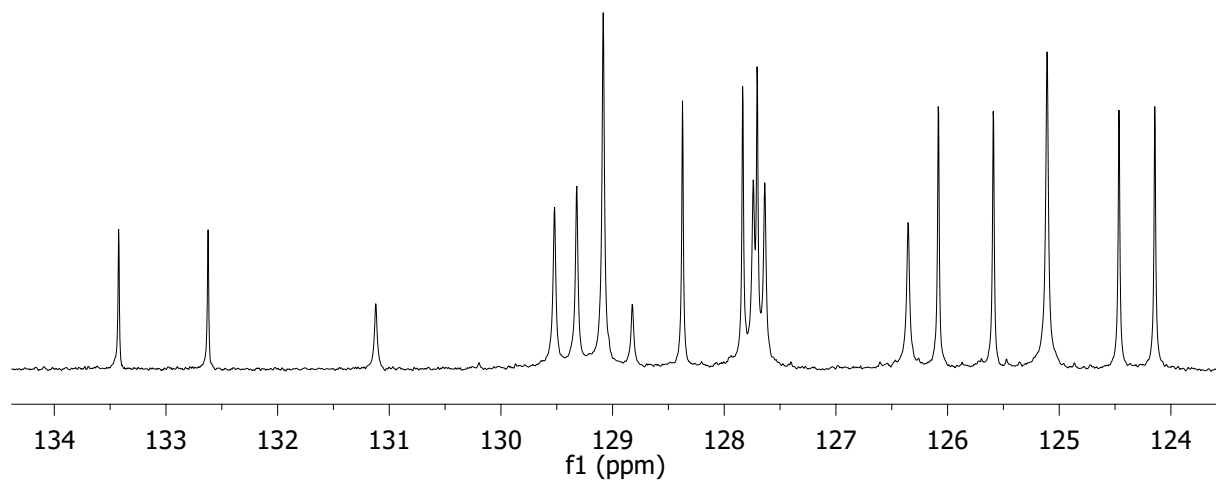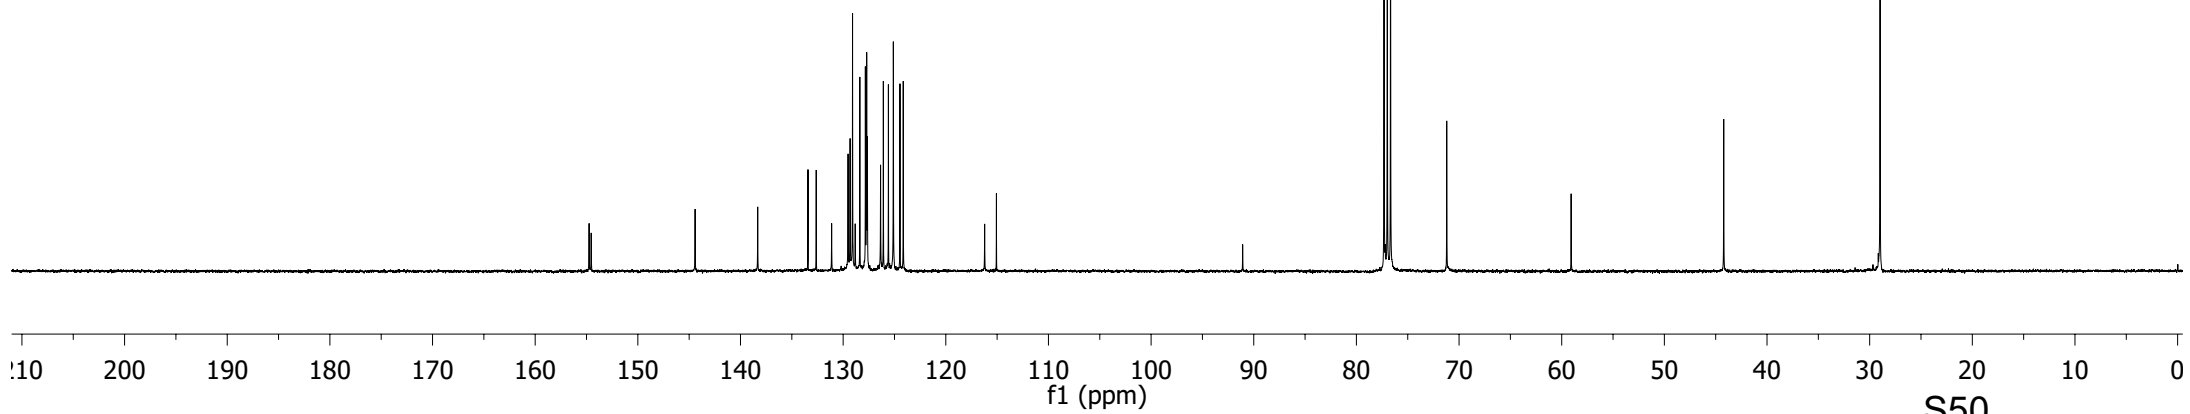

S50

Solvent  $\text{CDCl}_3$   
Spectrometer Frequency 400

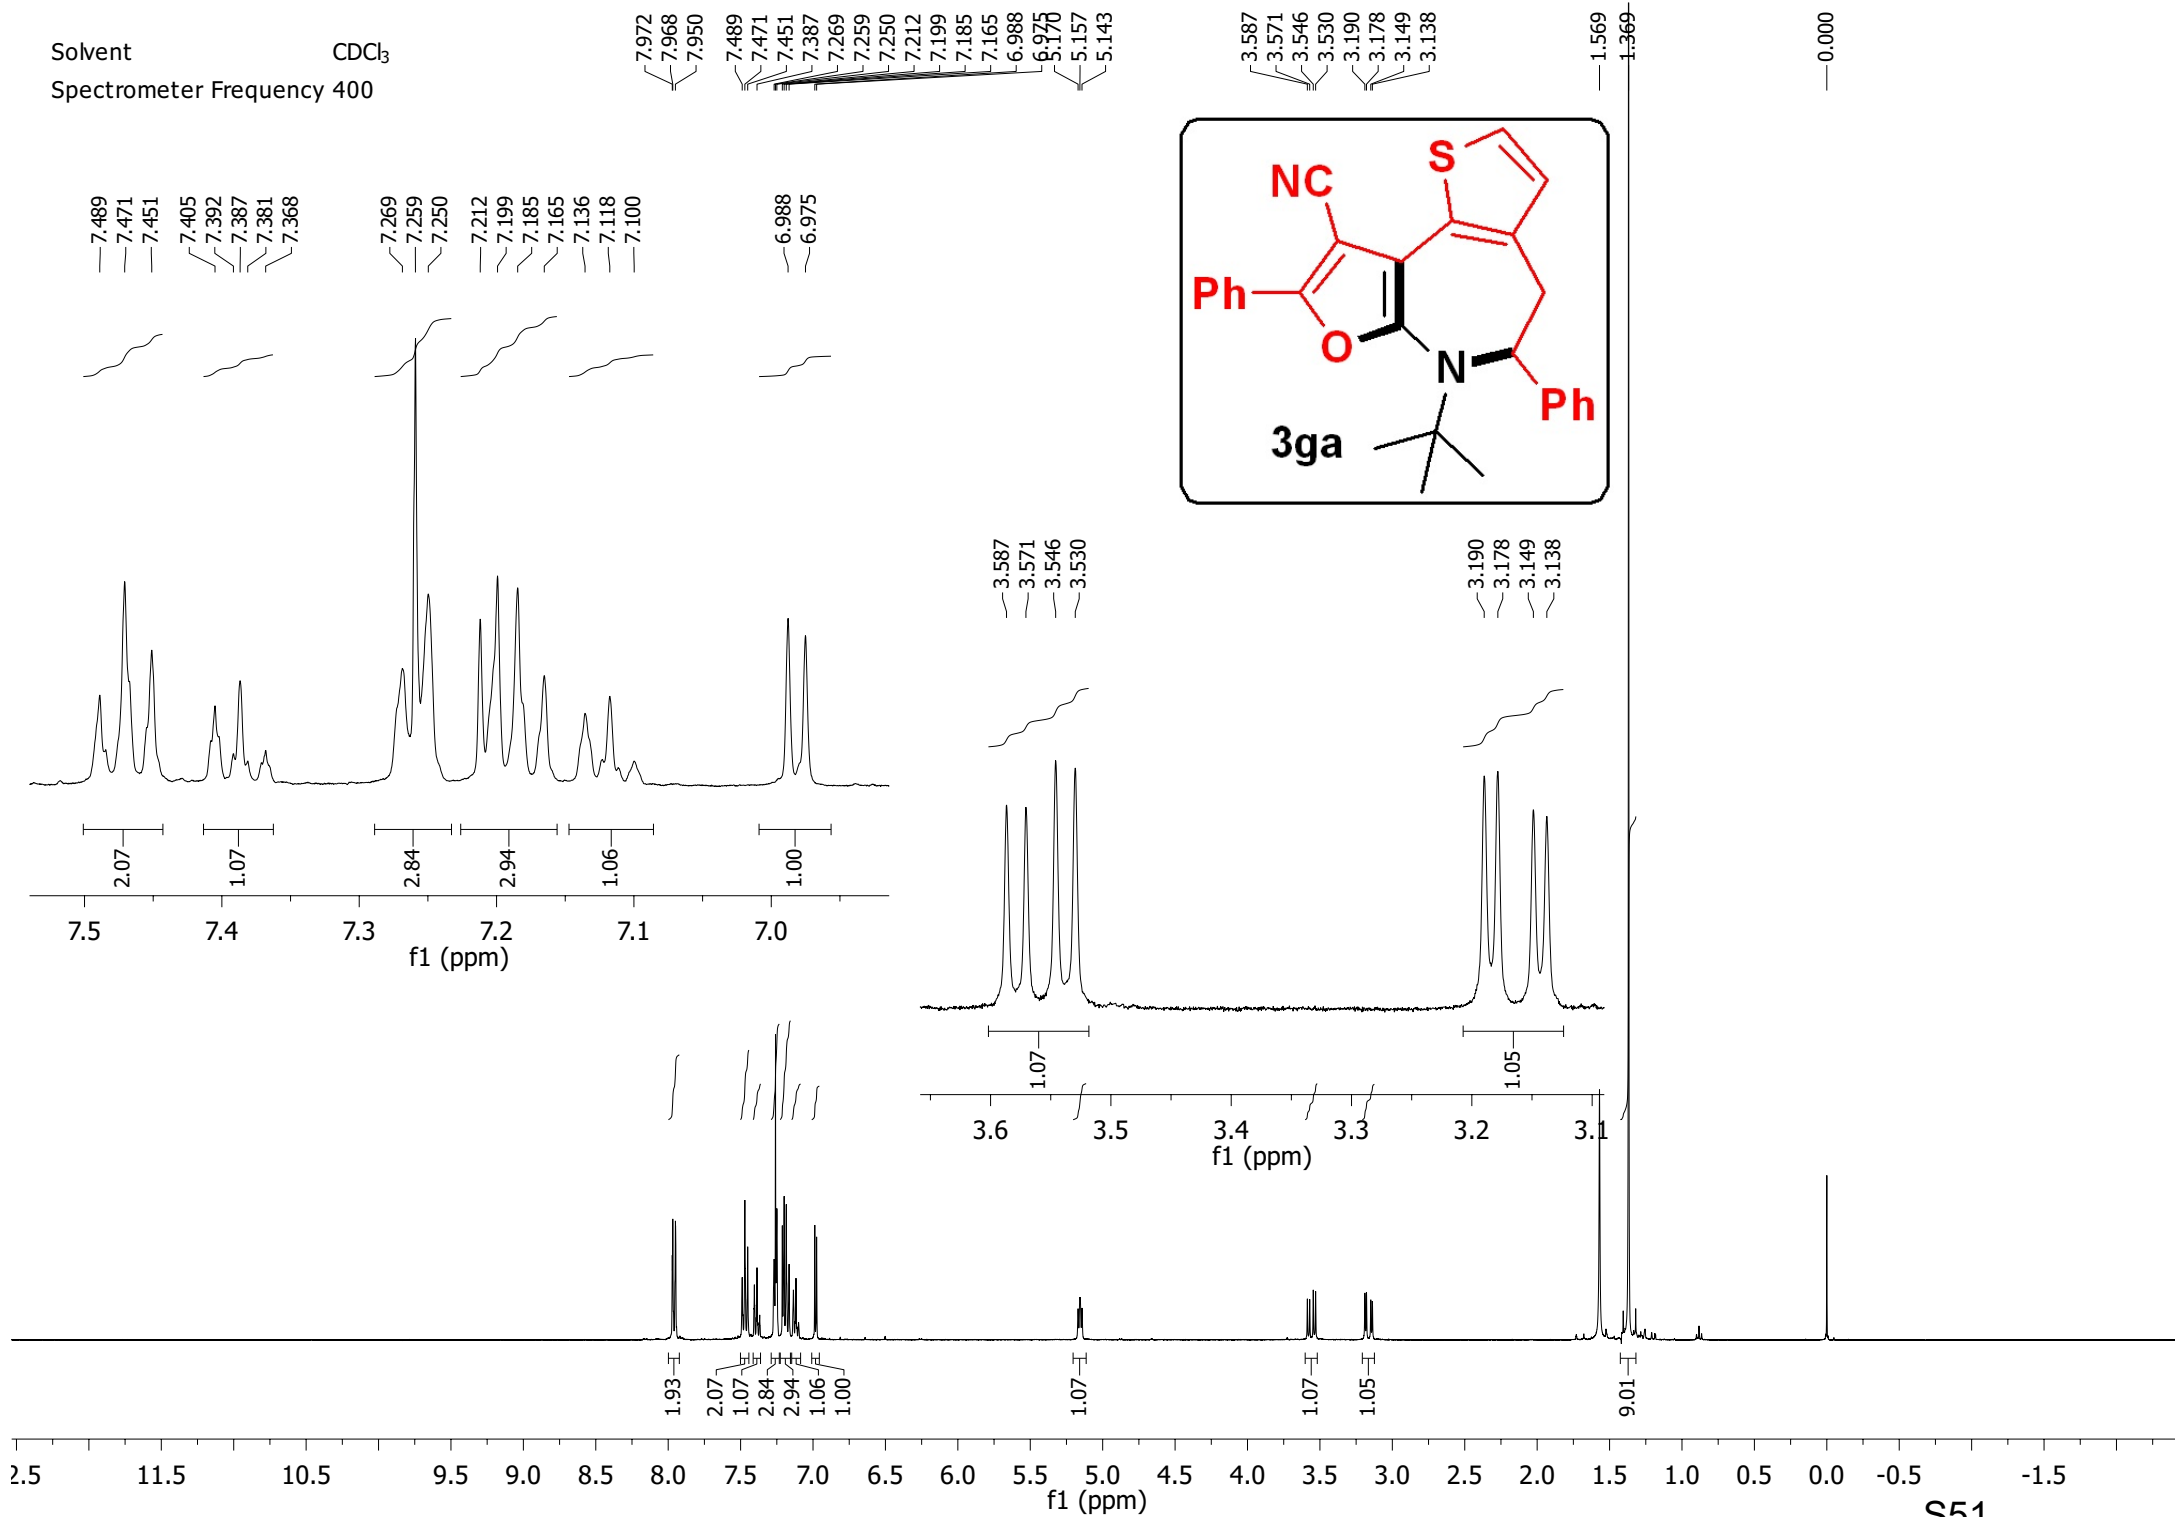

Solvent  $\text{CDCl}_3$   
Spectrometer Frequency 100

153.635  
152.463  
142.629  
135.561  
129.300  
129.244  
128.985  
128.179  
126.669  
126.300  
124.873

77.310  
76.993  
76.676

59.608  
58.607

36.508  
29.604

129.300  
129.244  
128.985  
128.526  
128.179  
127.963

126.669  
126.300

124.873

122.981

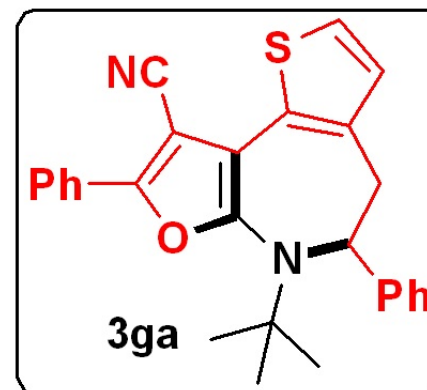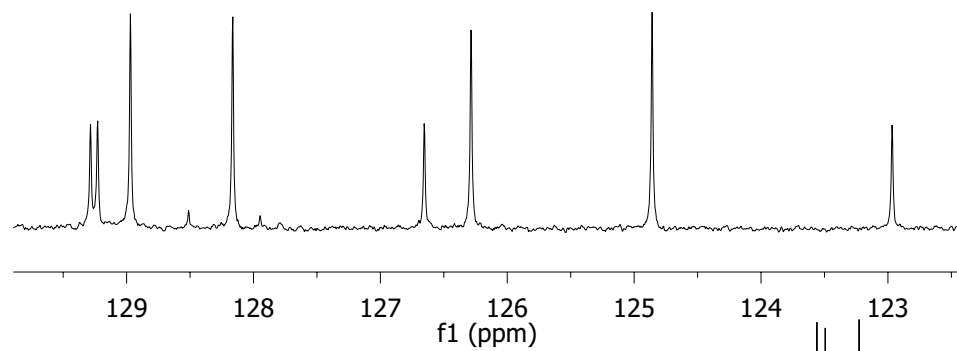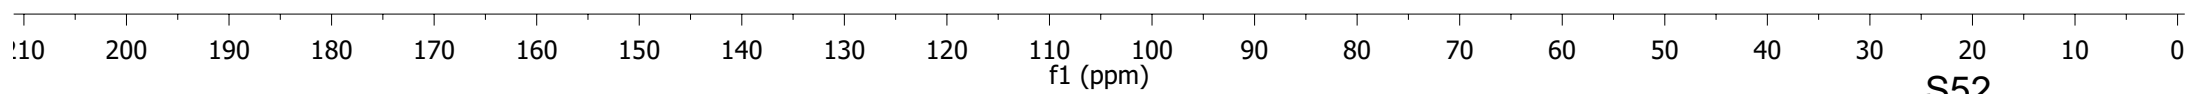



Solvent  $\text{CDCl}_3$   
Spectrometer Frequency 400

8.034  
8.012  
7.624  
7.622  
7.557  
7.535  
7.479  
7.476  
7.458  
7.367  
7.349  
7.330  
7.298  
7.295  
7.286  
7.283  
7.269  
7.266  
7.249  
7.238

5.031  
5.022  
5.001  
4.991

3.020  
2.989  
2.985  
2.954  
2.794  
2.784  
2.758  
2.748

1.378

0.956

0.000

8.034  
8.012

7.624  
7.622  
7.557  
7.535  
7.479  
7.476  
7.458  
7.367  
7.349  
7.330  
7.298  
7.295  
7.286  
7.283  
7.269  
7.249  
7.238

3.020  
2.989  
2.985  
2.954

2.794  
2.784  
2.758  
2.748

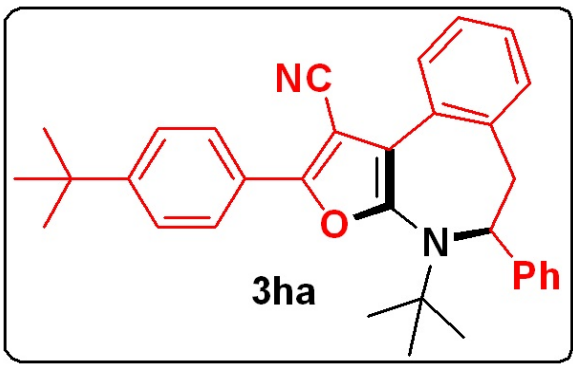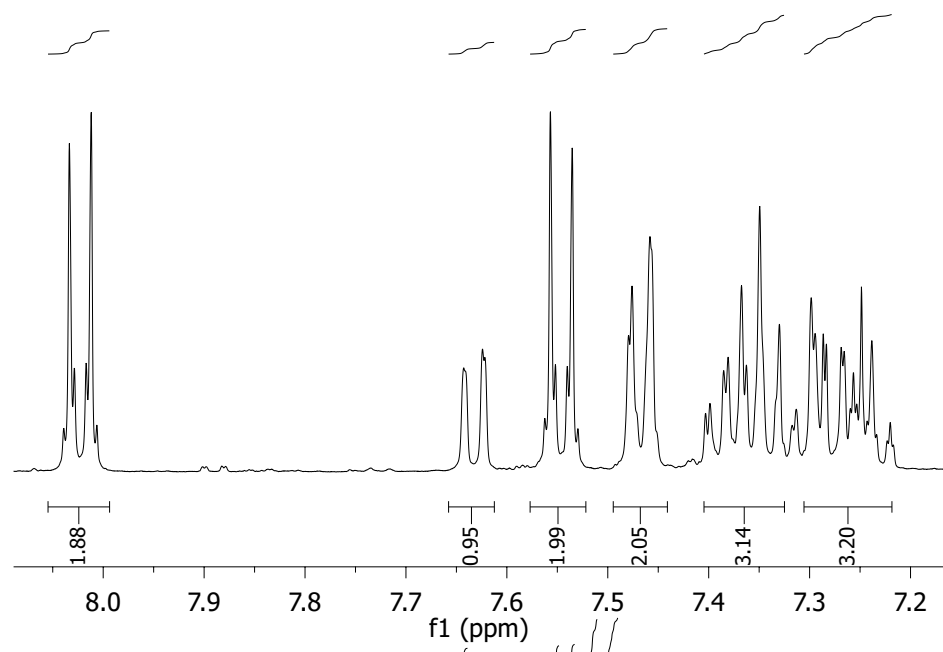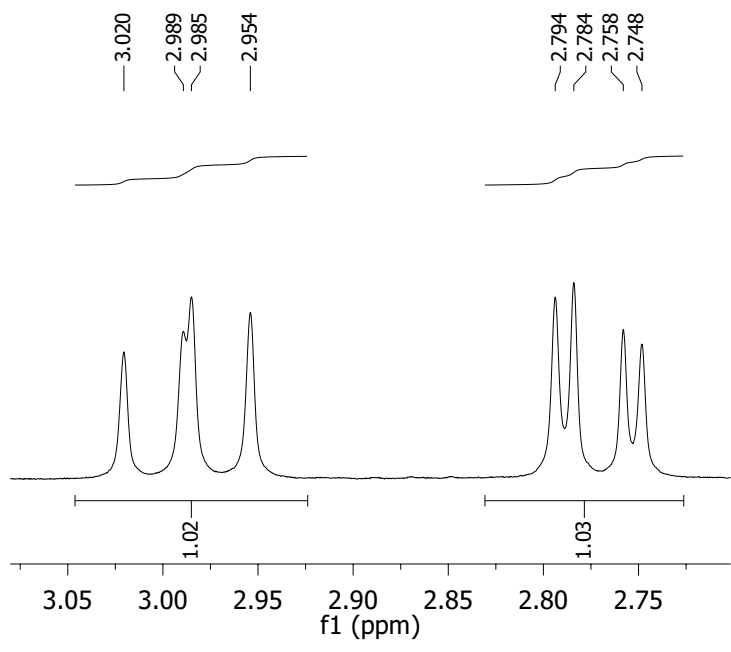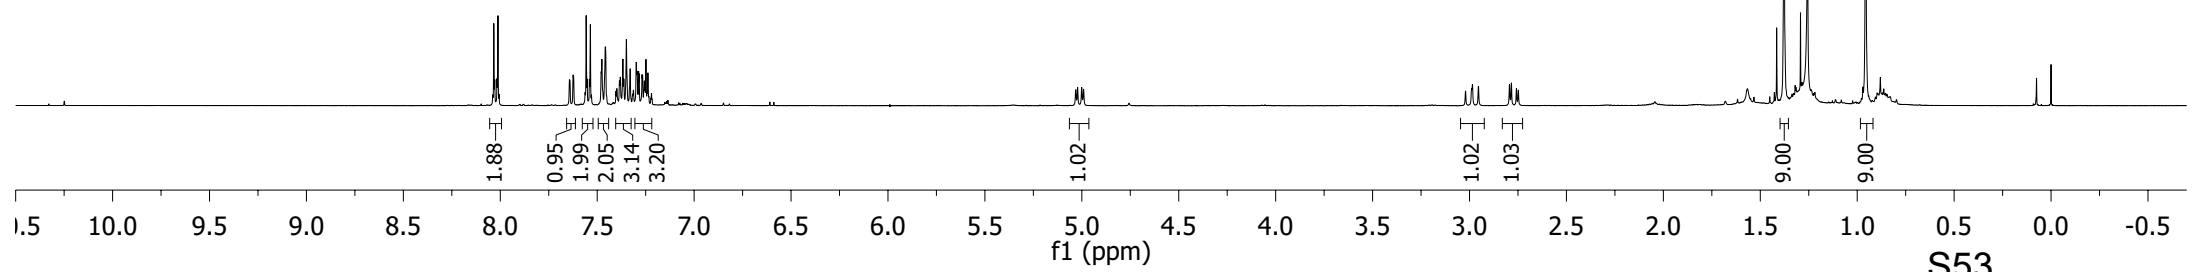

Solvent  $\text{CDCl}_3$   
Spectrometer Frequency 100

155.081  
154.233  
152.951  
147.029  
138.373  
128.466  
127.614  
127.559  
126.770  
125.987  
125.827  
124.987  
115.225

90.345  
77.319  
77.001  
76.684  
71.044  
58.911  
44.352  
34.907  
31.169  
29.689  
29.652  
28.901

147.029

138.373

131.257  
129.811  
129.270  
128.466  
127.614  
127.559  
126.770  
126.317  
126.092  
125.987  
125.827  
124.967

116.091  
115.225

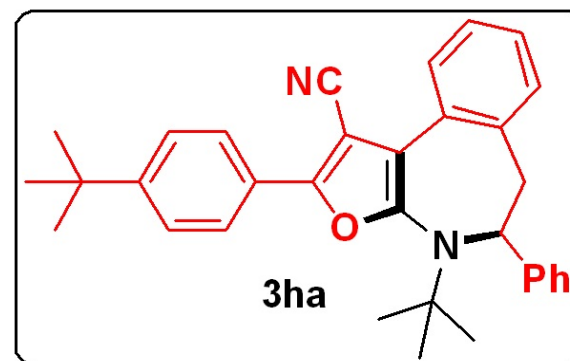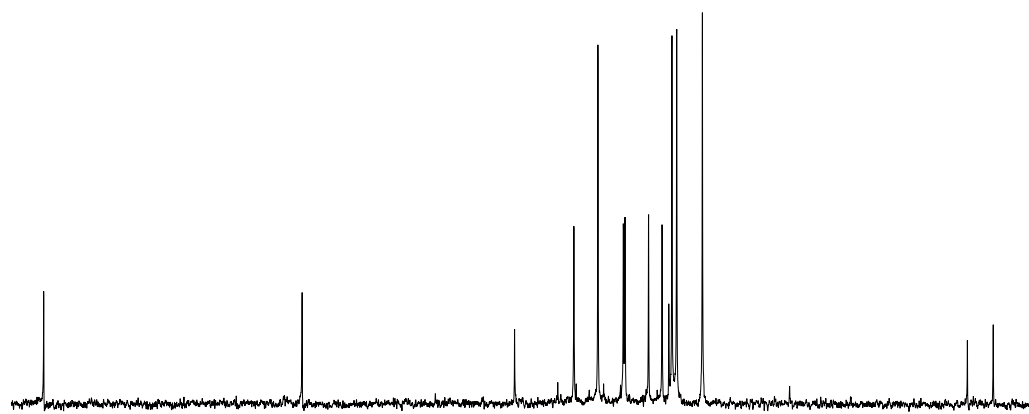

145 140 135 130 125 120 115

f1 (ppm)

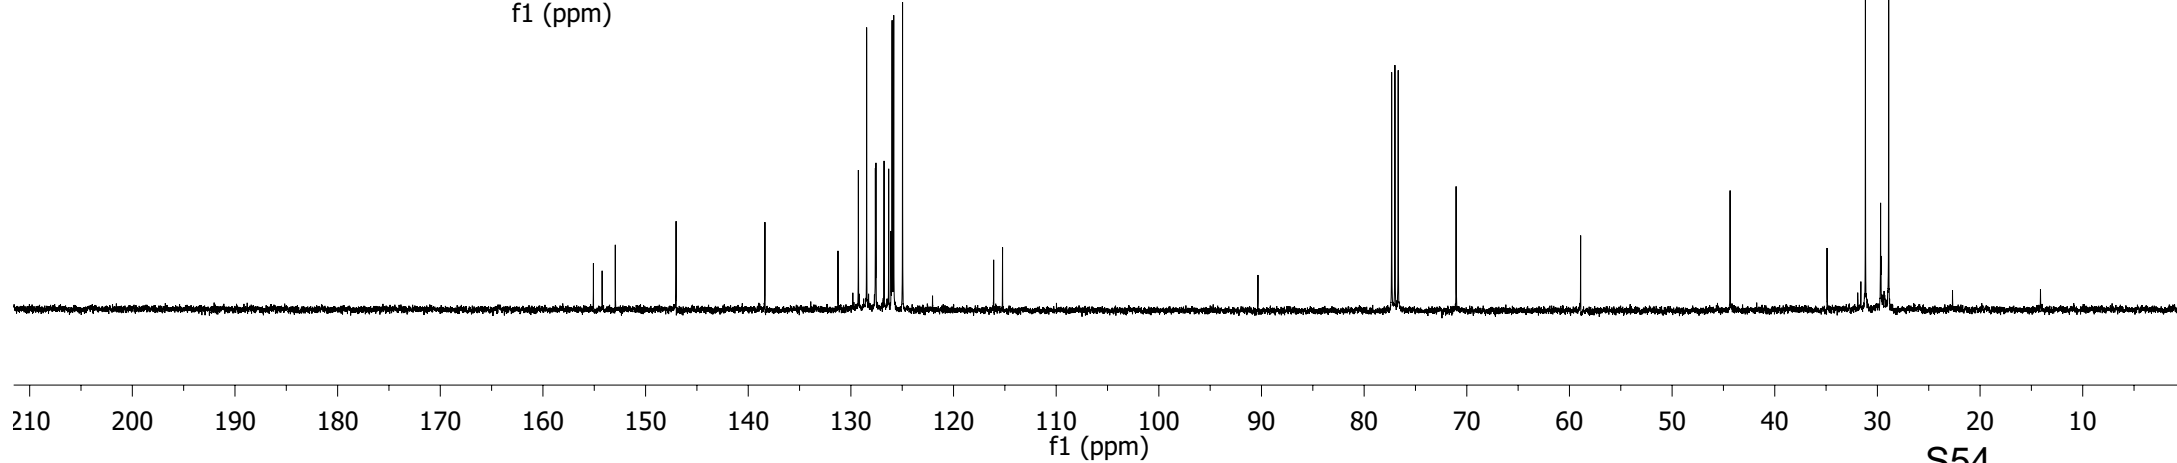

f1 (ppm)

S54

Solvent  $\text{CDCl}_3$   
Spectrometer Frequency 400

7.982  
7.962  
7.638  
7.619  
7.485  
7.481  
7.464  
7.461  
7.456  
7.389  
7.385  
7.373  
7.369  
7.355  
7.351  
7.335  
7.331  
7.311  
7.302  
7.297  
7.289  
7.270  
7.262  
7.259  
7.241  
5.028  
5.018  
4.997  
4.988

3.027  
2.997  
2.992  
2.961  
2.796  
2.787  
2.760  
2.751  
2.437

0.955

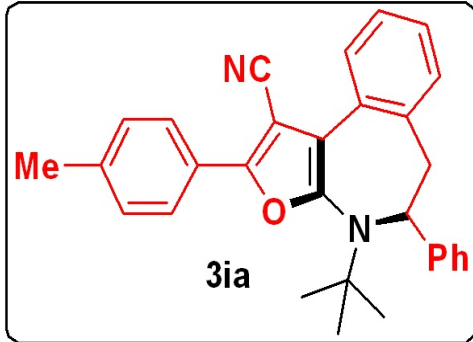

7.638  
7.619  
7.485  
7.481  
7.476  
7.464  
7.461  
7.456  
7.389  
7.385  
7.373  
7.369  
7.355  
7.351  
7.335  
7.331  
7.311  
7.302  
7.297  
7.289  
7.270  
7.262  
7.259  
7.241  
7.223

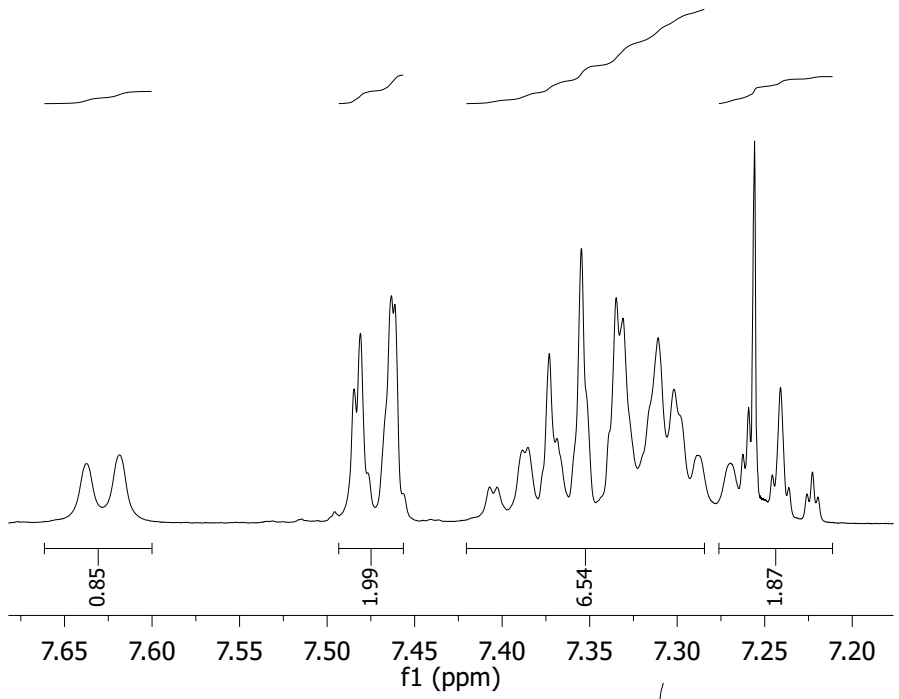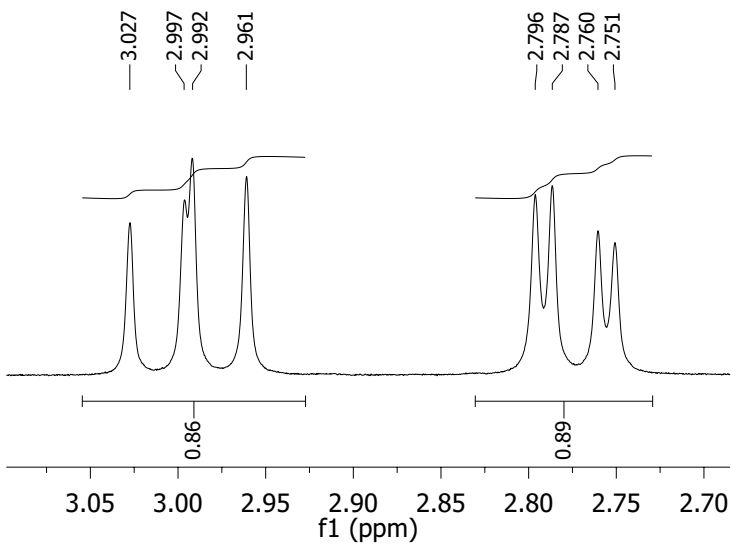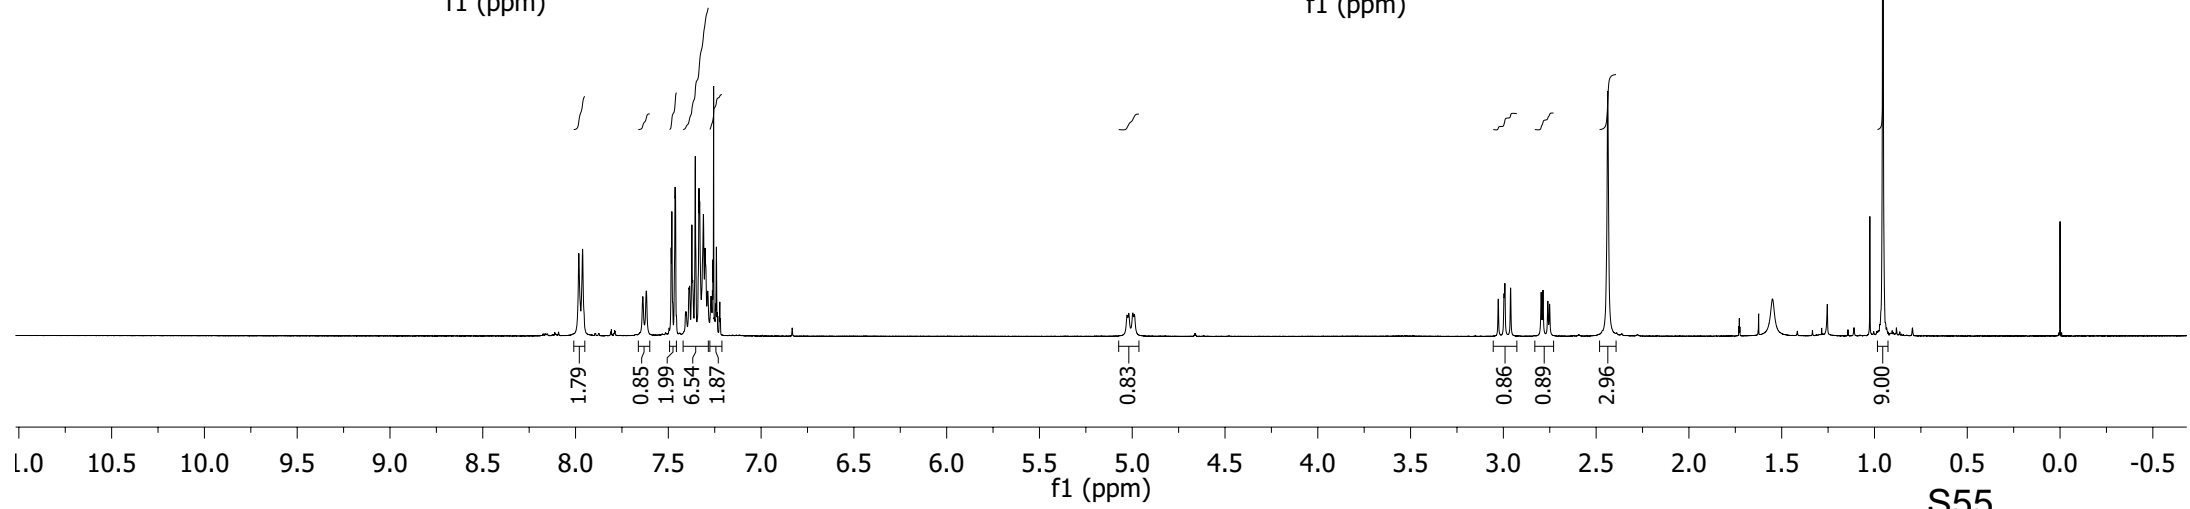

Solvent  $\text{CDCl}_3$   
Spectrometer Frequency 100

155.164  
154.206  
147.058  
139.844  
138.399  
129.720  
129.281  
128.476  
127.581  
126.775  
125.849  
125.116  
116.136  
115.253

90.228

77.310  
76.993  
76.676  
71.037

58.939

44.341

28.895

21.516

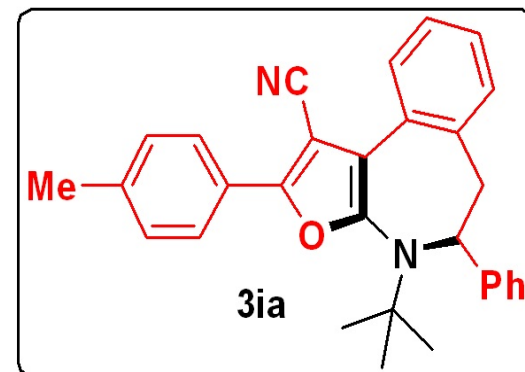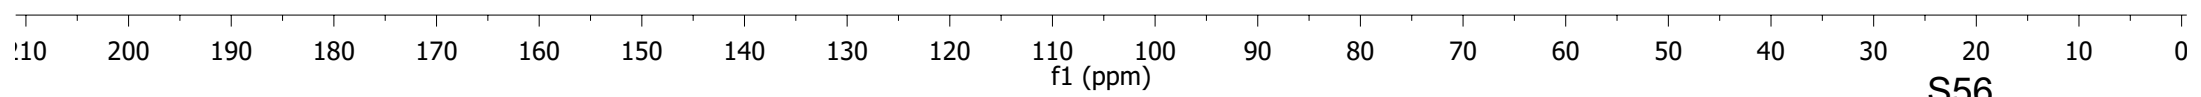

Solvent  $\text{CDCl}_3$   
Spectrometer Frequency 400

7.900  
7.880  
7.866  
7.644  
7.625  
7.483  
7.465  
7.428  
7.409  
7.395  
7.390  
7.380  
7.361  
7.342  
7.320  
7.305  
7.301  
7.296  
7.293  
7.275  
7.273  
7.264  
7.257  
7.245  
7.227

5.032  
5.022  
5.001  
4.992

3.028  
2.992  
2.961  
2.799  
2.790  
2.763  
2.754  
2.474

0.962

0.000

7.900  
7.880  
7.866

7.644  
7.625

7.483  
7.465  
7.428  
7.409  
7.395  
7.390  
7.380  
7.361  
7.342  
7.320  
7.305  
7.301  
7.296  
7.293  
7.275  
7.264  
7.257  
7.245  
7.227

3.028

2.992

2.961

2.799

2.790

2.763

2.754

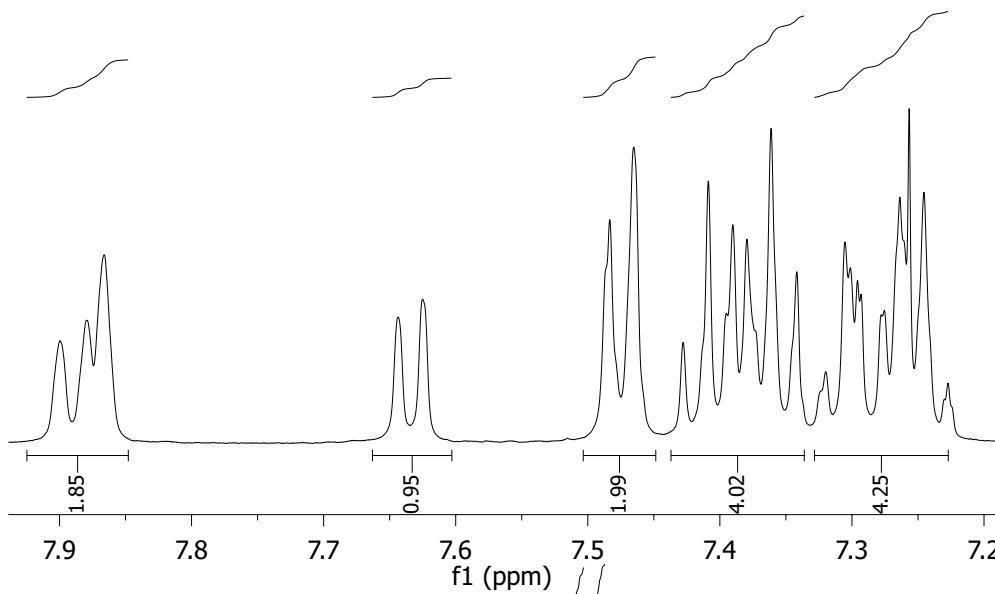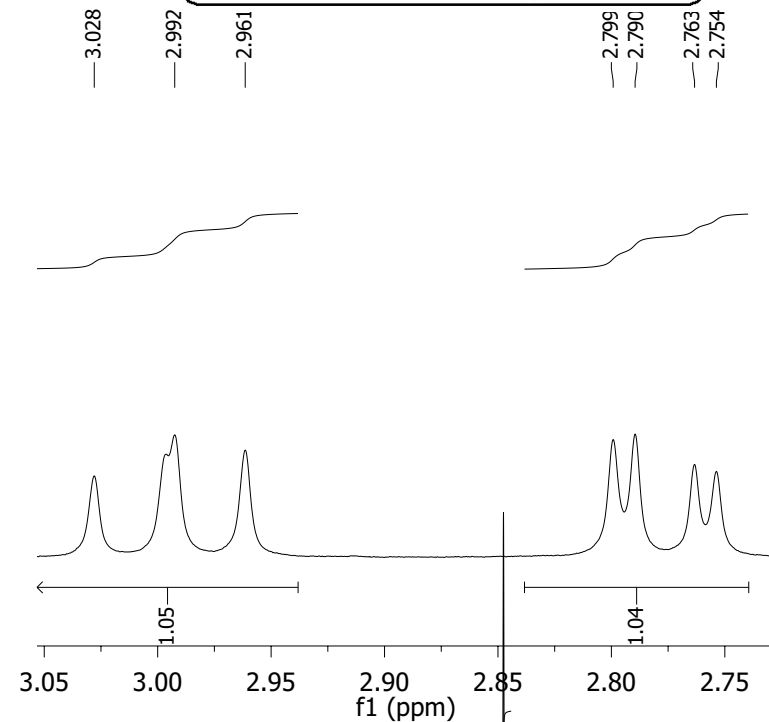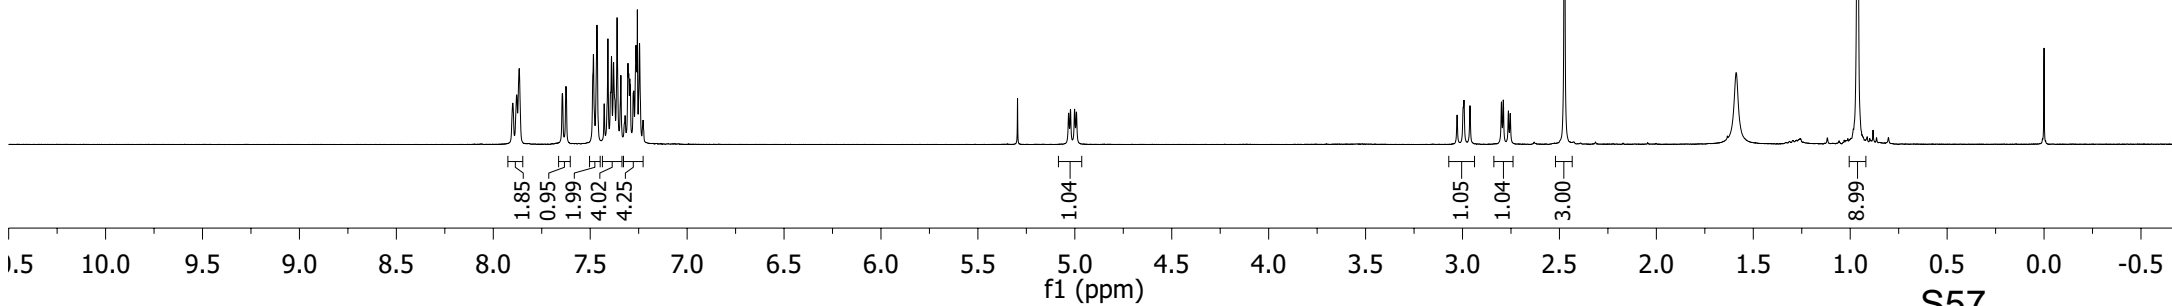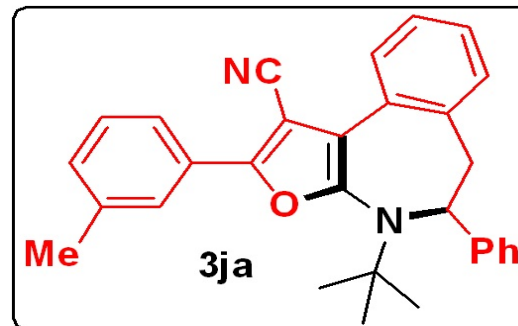

Solvent  $\text{CDCl}_3$   
Spectrometer Frequency 100

154.945  
154.422  
147.006  
138.818  
138.365  
128.954  
128.473  
127.585  
126.776  
125.829  
125.574  
122.383  
116.280  
115.118

90.840  
77.310  
76.993  
76.675  
71.025  
58.977  
44.323  
28.898  
21.593

154.945  
154.422

147.006

138.818  
138.365

131.170  
130.370  
129.270  
128.954  
128.729  
128.473  
127.662  
127.585  
126.776  
126.319  
125.829  
125.574

122.383

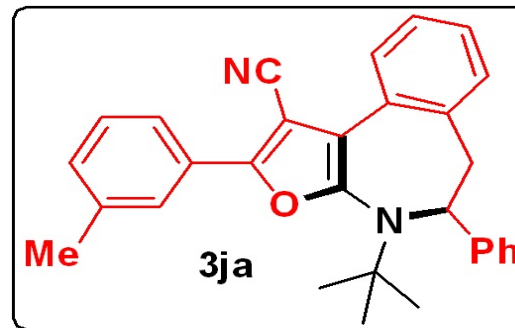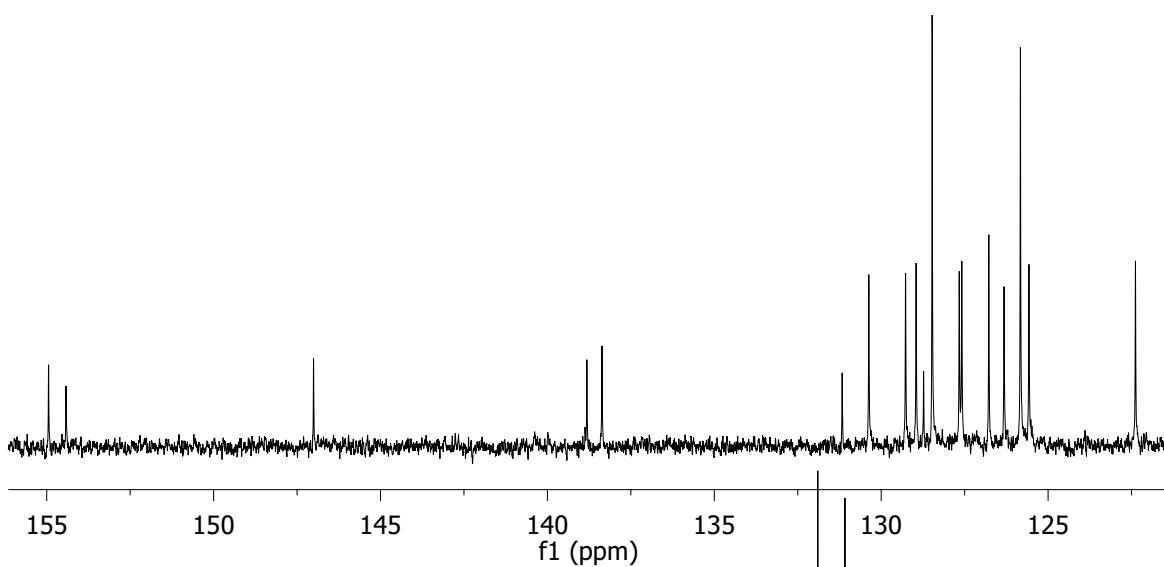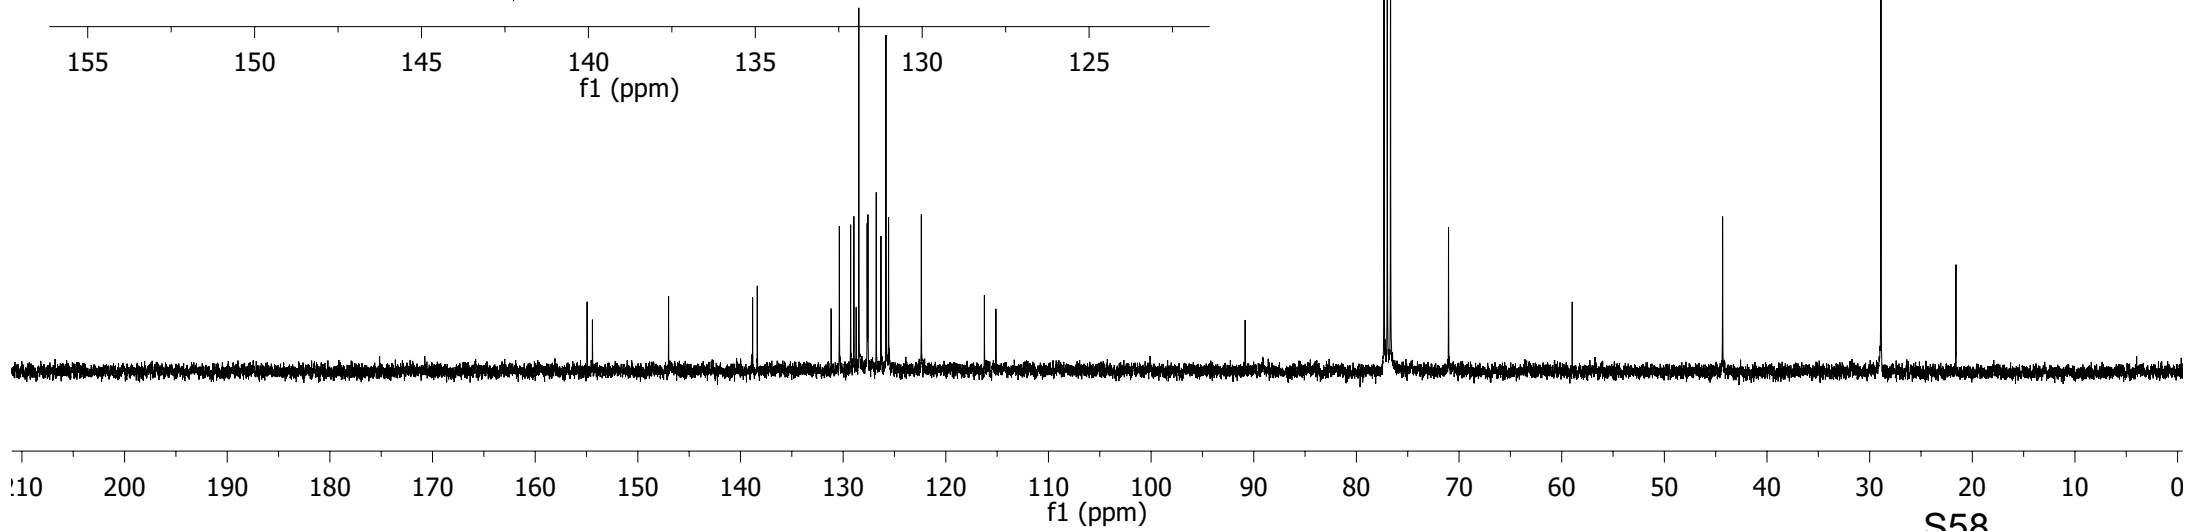

Solvent  $\text{CDCl}_3$   
Spectrometer Frequency 400

8.132, 8.128, 8.123, 8.072, 8.068, 8.066, 8.062, 8.048, 8.046, 8.044, 8.042, 7.632, 7.615, 7.612, 7.466, 7.462, 7.448, 7.446, 7.444, 7.442, 7.405, 7.386, 7.369, 7.366, 7.350, 7.306, 7.299, 7.271, 7.256, 7.253, 5.042, 5.033, 5.011, 5.002

3.022, 2.991, 2.986, 2.955, 2.810, 2.800, 2.774, 2.764

0.969

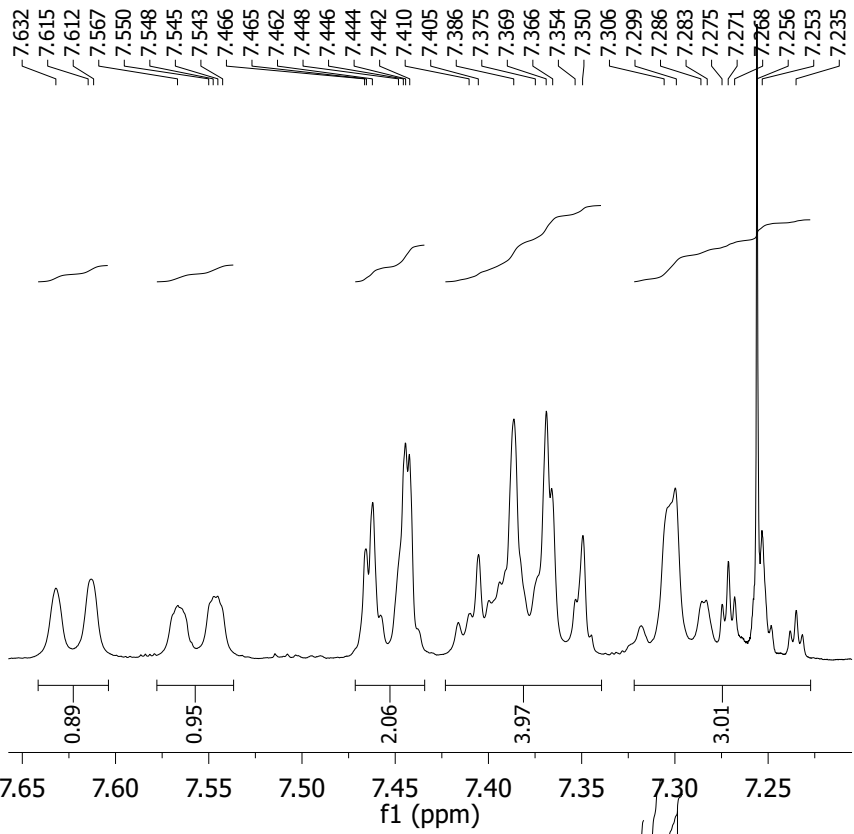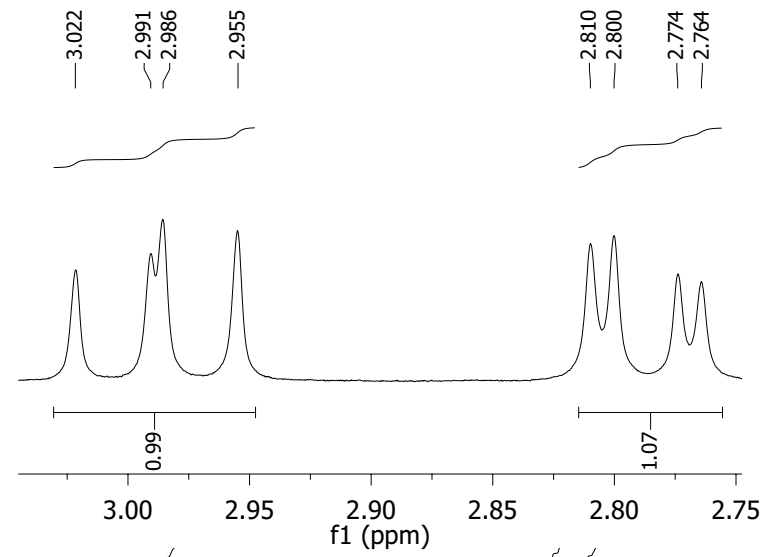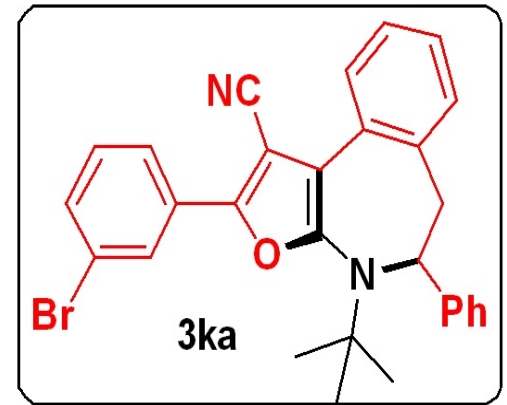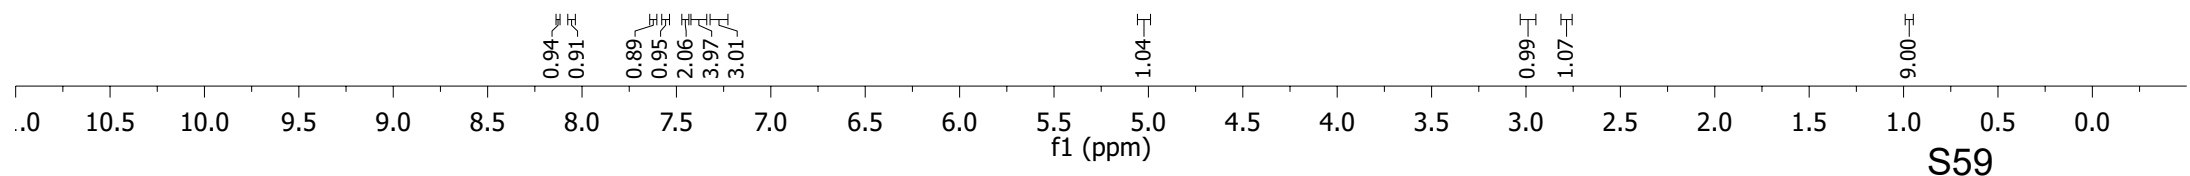

Solvent  $\text{CDCl}_3$   
Spectrometer Frequency 100

—155.078  
—152.667  
—146.782  
—138.303  
130.619  
129.334  
128.542  
127.881  
127.662  
126.886  
125.790  
116.366  
114.595

—92.163

77.309  
76.991  
76.674  
—71.025

—59.137

—44.226

—28.948

—132.318

130.792  
130.619  
130.583

—129.334

—128.542

127.881  
127.802  
127.753  
127.662

—126.886

—126.310

—125.790

—123.545

—123.213

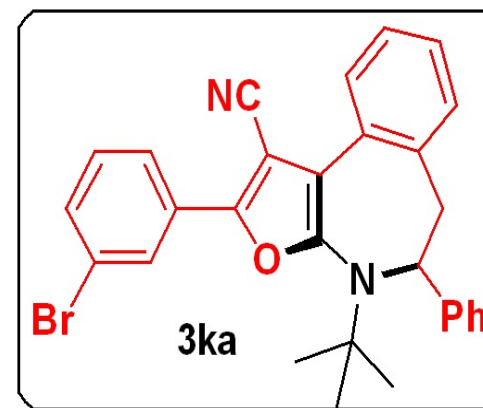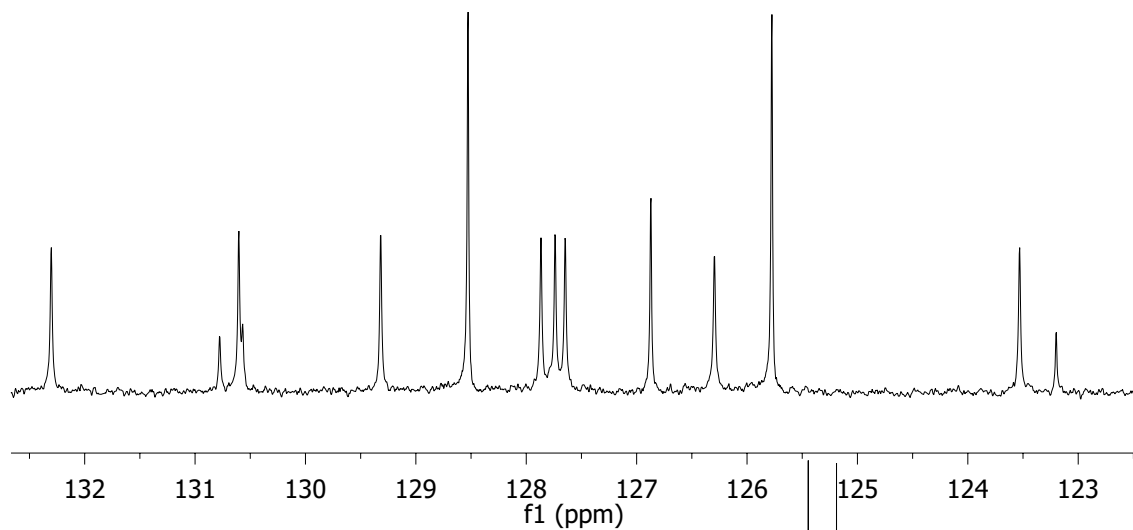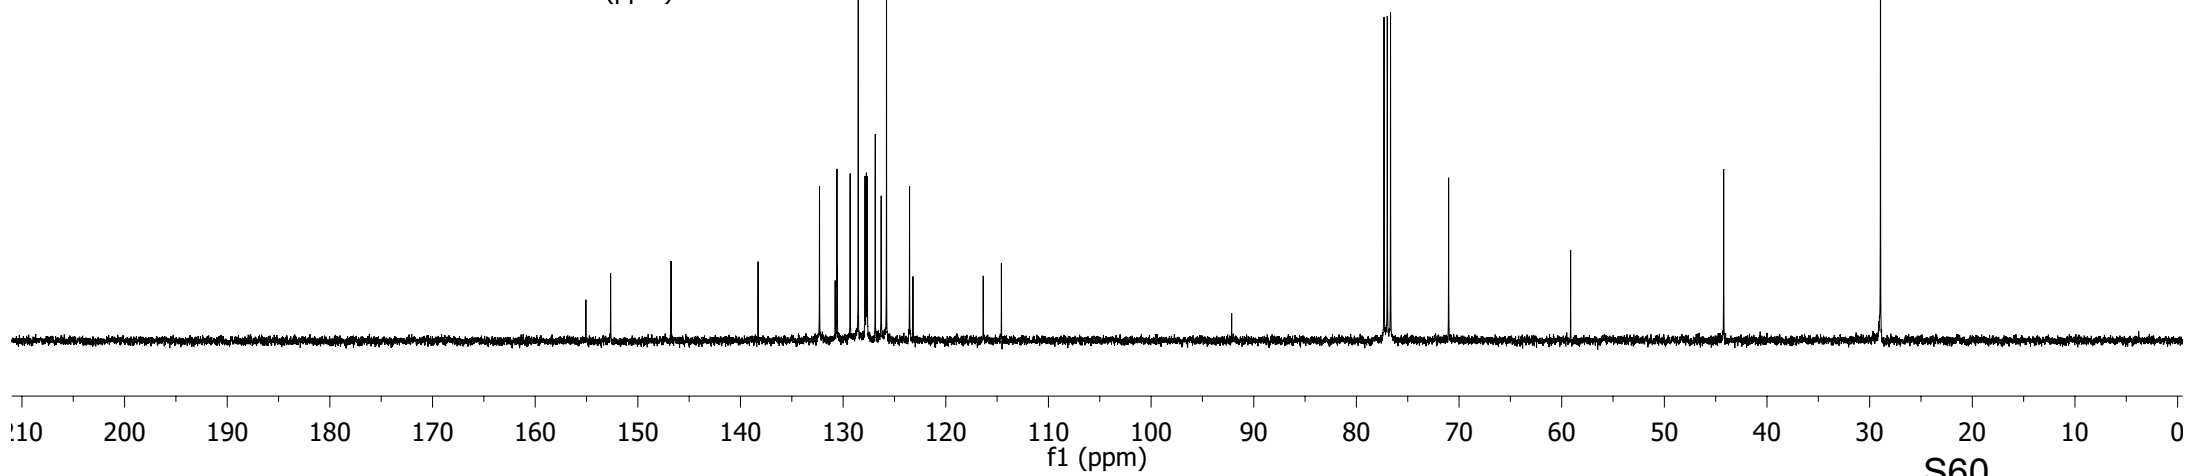

S60



7.779  
7.776  
7.759  
7.756  
7.731  
7.726  
7.711  
7.707  
7.633  
7.631  
7.616  
7.613  
7.510  
7.506  
7.501  
7.497  
7.489  
7.486  
7.481  
7.478  
7.463  
7.460  
7.414  
7.410  
7.396  
7.392  
7.383  
7.378  
7.373  
7.363  
7.359  
7.344  
7.340  
7.325  
7.320  
7.309  
7.306  
7.291  
7.288  
7.252  
7.237  
3.028  
3.028  
5.058  
5.037  
5.027

Solvent  $\text{CDCl}_3$   
Spectrometer Frequency 400

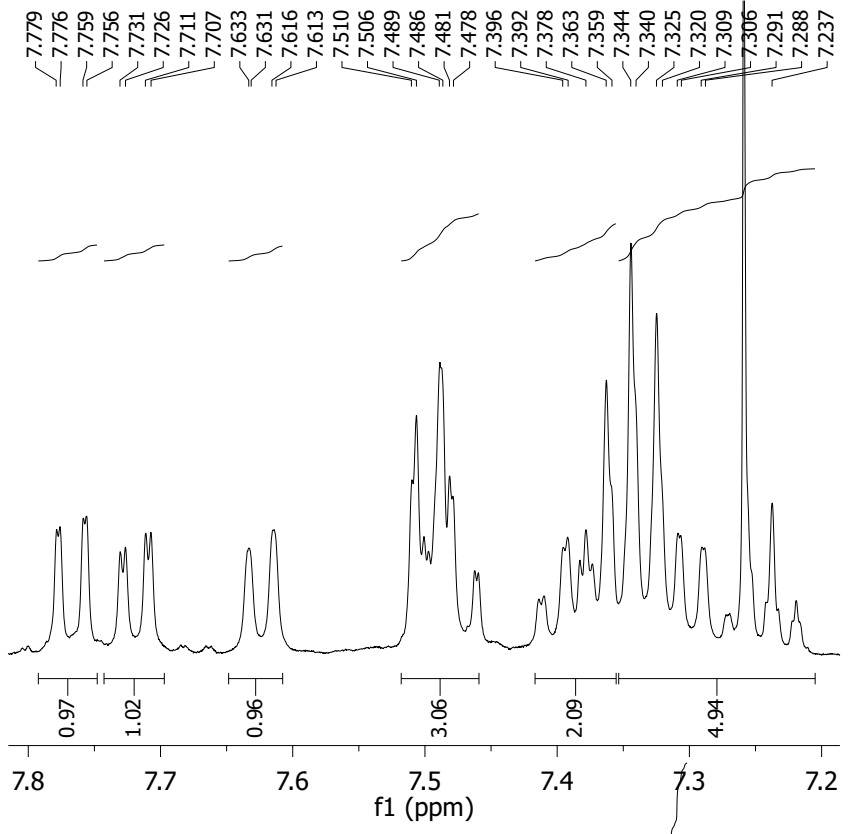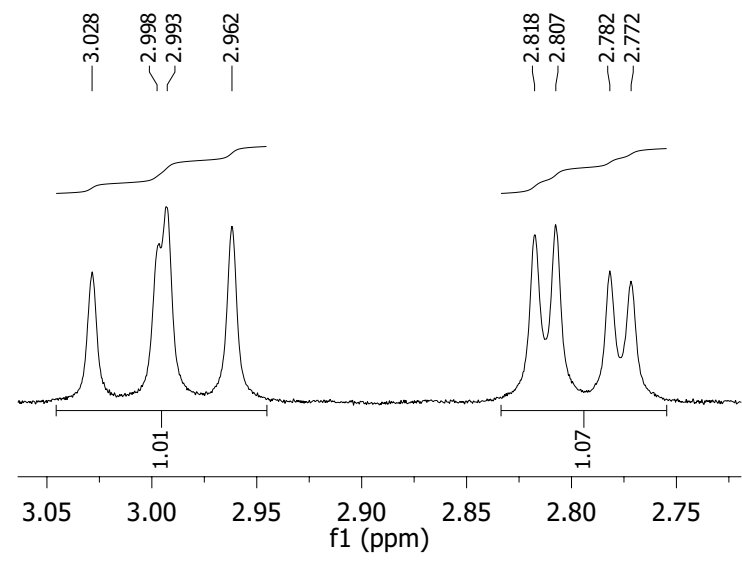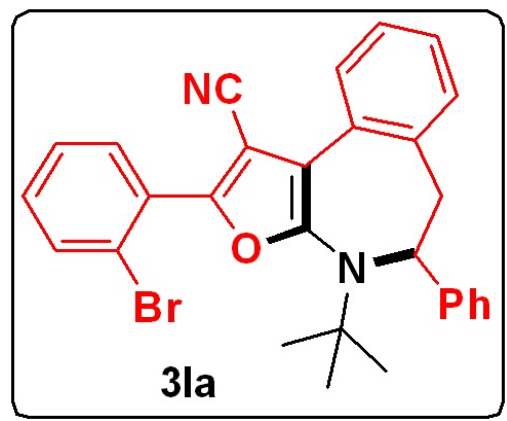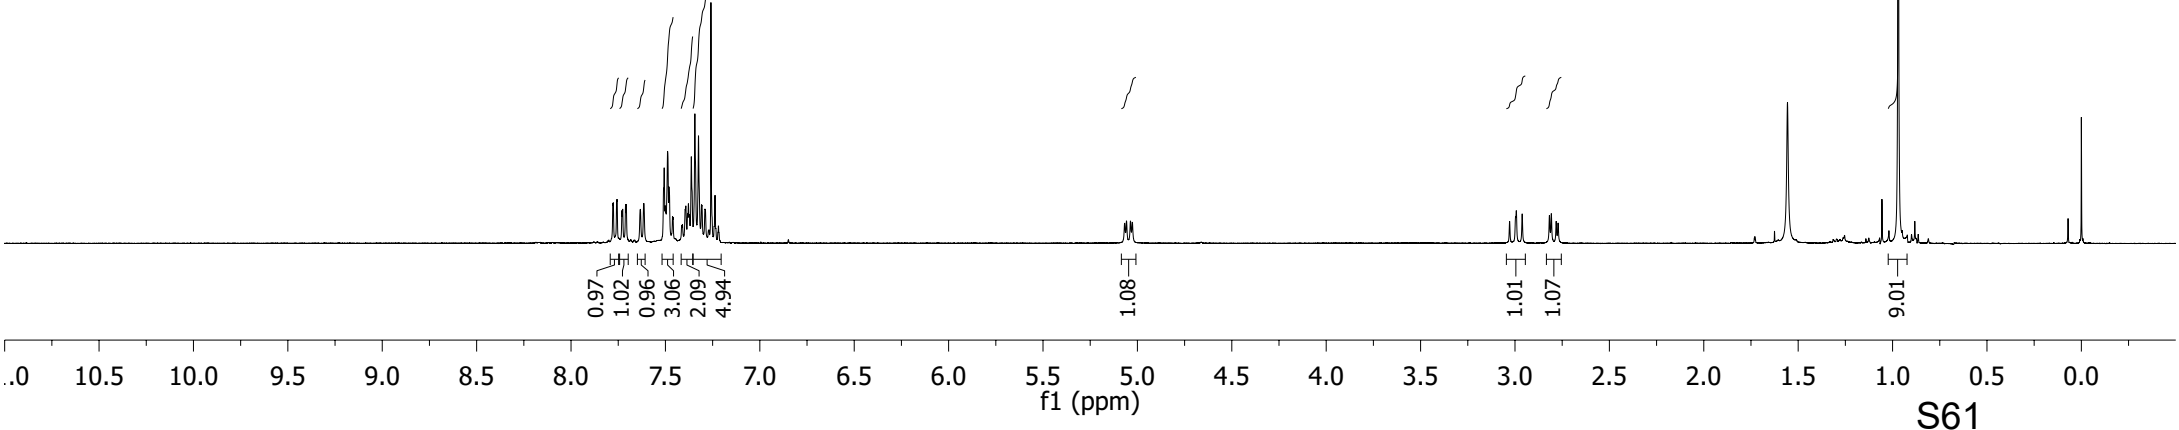

Solvent  $\text{CDCl}_3$   
Spectrometer Frequency 100

155.535  
154.686  
146.826  
134.125  
131.697  
131.349  
129.315  
128.448  
127.777  
127.647  
127.610  
126.806  
126.422  
125.929  
115.929  
114.019

95.396

77.309  
76.991  
76.674  
71.274

58.901

44.269

29.045

134.125

131.697  
131.349  
131.172

129.749  
129.315

128.448

127.777  
127.647  
127.610

126.806  
126.422  
125.929

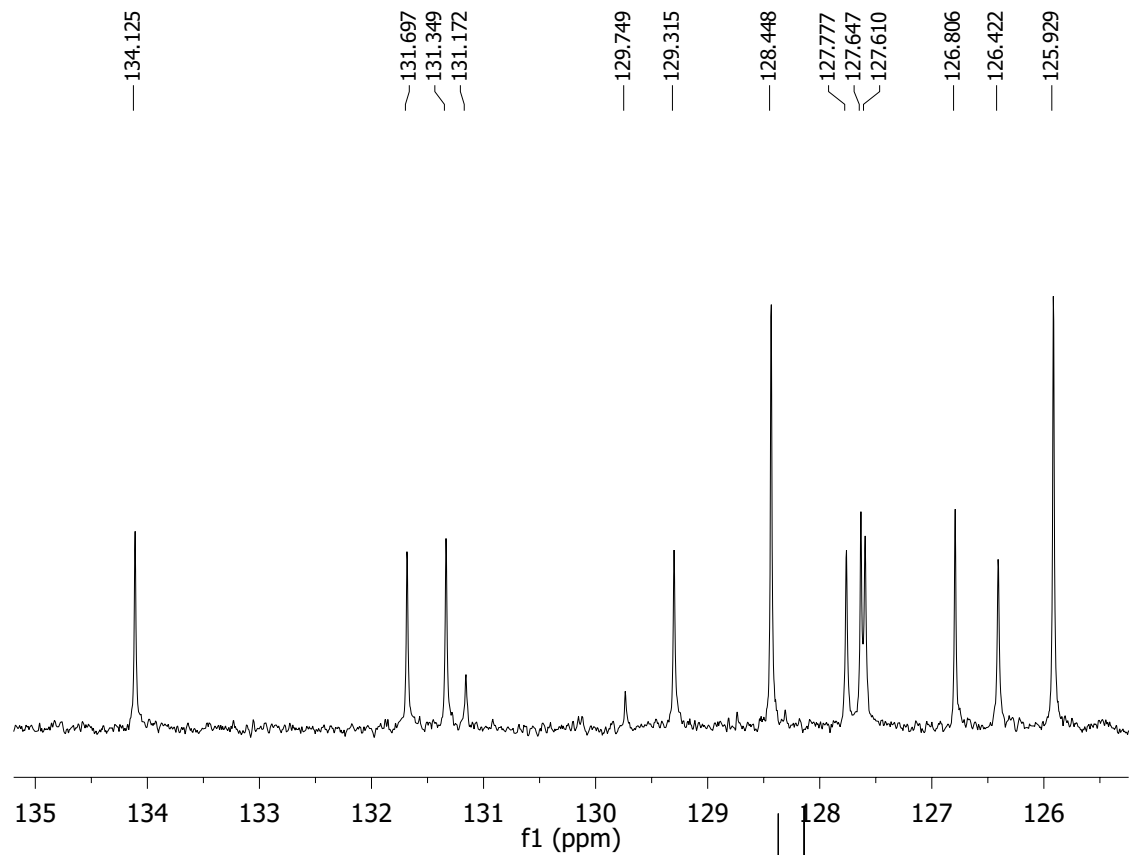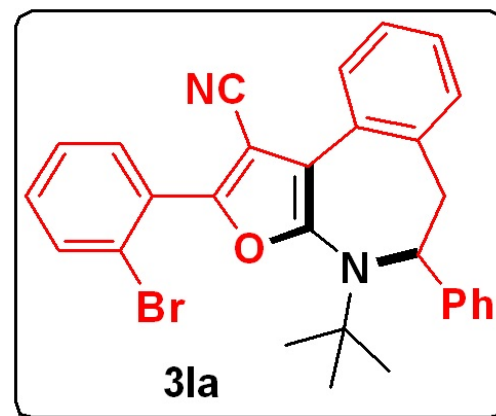

10 200 190 180 170 160 150 140 130 120 110 100 90 80 70 60 50 40 30 20 10 0

S62

Solvent  $\text{CDCl}_3$   
Spectrometer Frequency 400

8.027  
8.021  
8.016  
8.004  
7.999  
7.992  
7.630  
7.611  
7.497  
7.492  
7.480  
7.475  
7.467  
7.462  
7.445  
7.358  
7.358  
7.339  
7.303  
7.298  
7.279  
7.265  
7.247  
5.041  
5.031  
5.010  
5.000

3.026  
2.995  
2.990  
2.959  
2.807  
2.798  
2.772  
2.762

7.630  
7.611  
7.497  
7.492  
7.480  
7.475  
7.467  
7.462  
7.445  
7.413  
7.407  
7.396  
7.390  
7.377  
7.372  
7.358  
7.339  
7.317  
7.303  
7.298  
7.283  
7.279  
7.265  
7.247

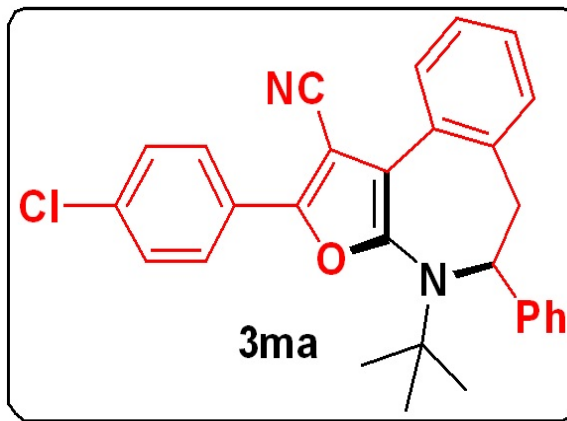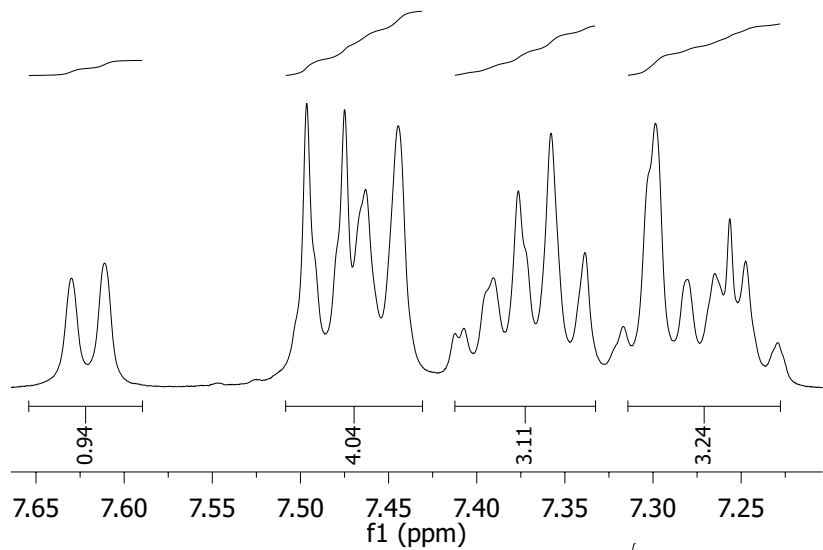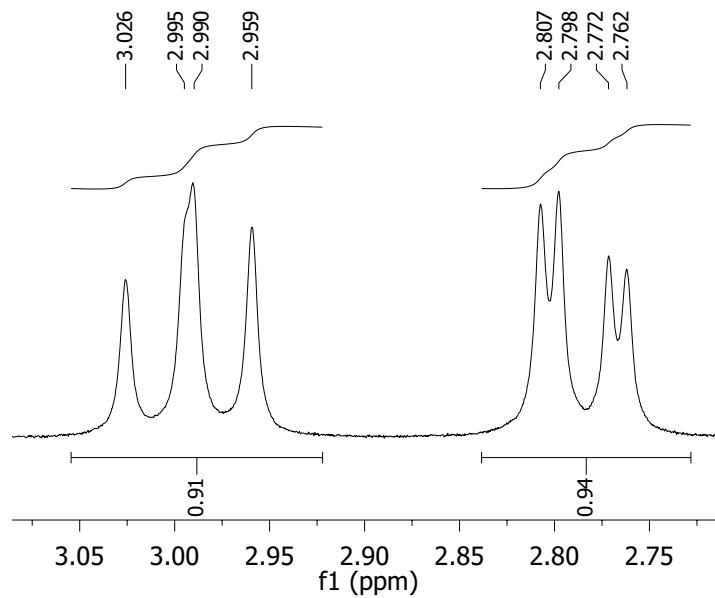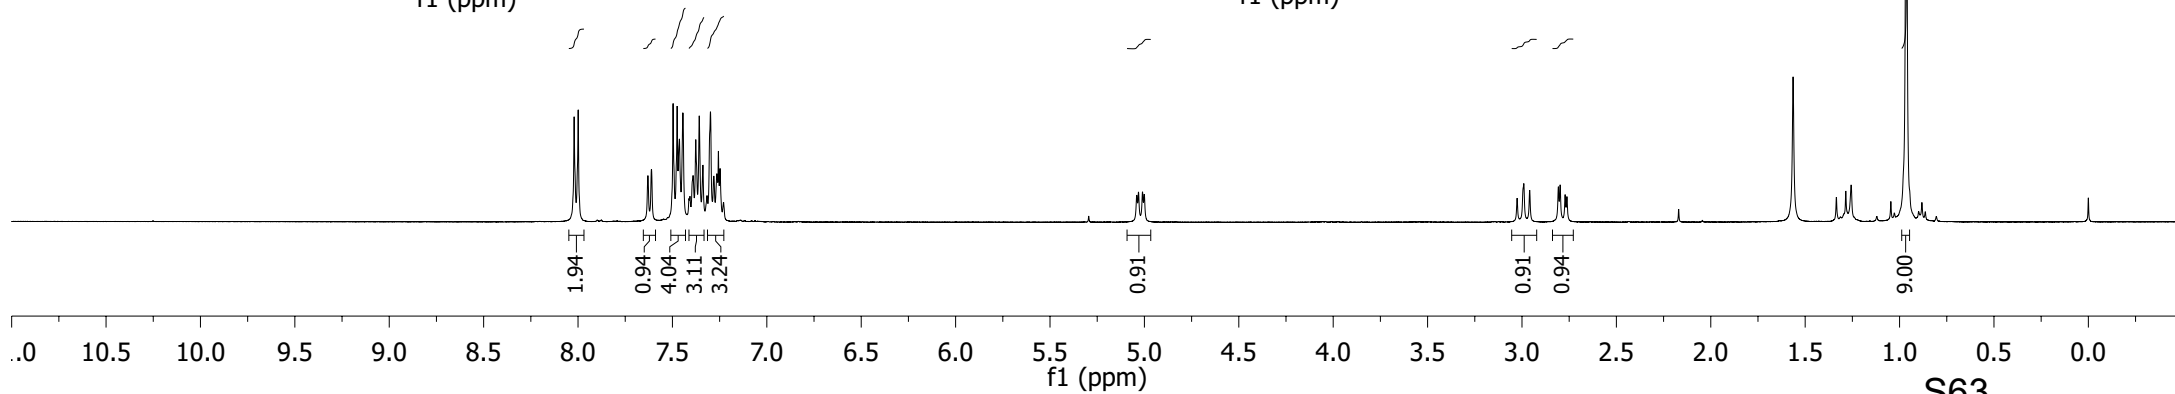

S63

Solvent  $\text{CDCl}_3$   
Spectrometer Frequency 100

154.789  
153.480  
146.844  
138.314  
135.349  
130.902  
129.345  
128.514  
127.827  
127.648  
127.242  
126.865  
126.281  
125.799  
116.234  
114.858

138.314

135.349

130.902

129.345

128.514

127.827

127.648

127.242

126.865

126.281

125.799

91.452

77.310

76.992

76.675

71.022

59.057

44.245

28.932

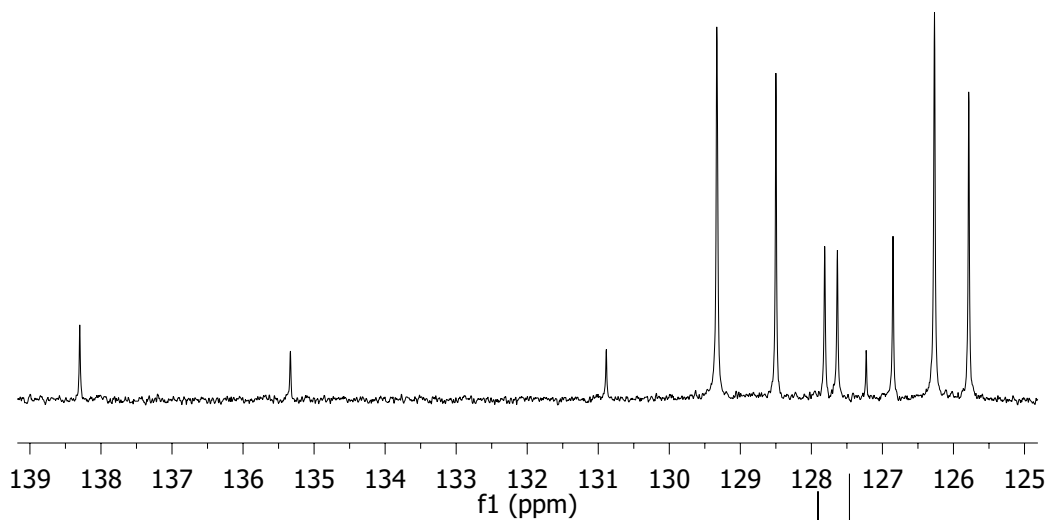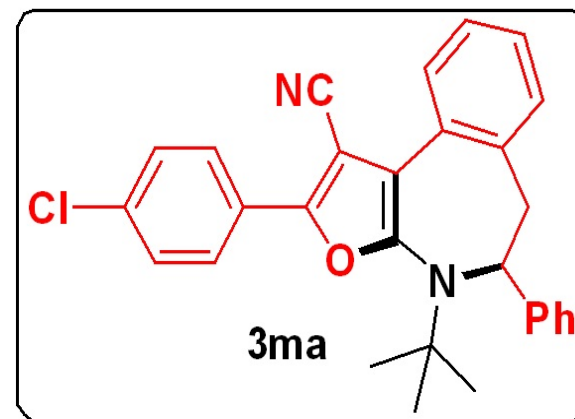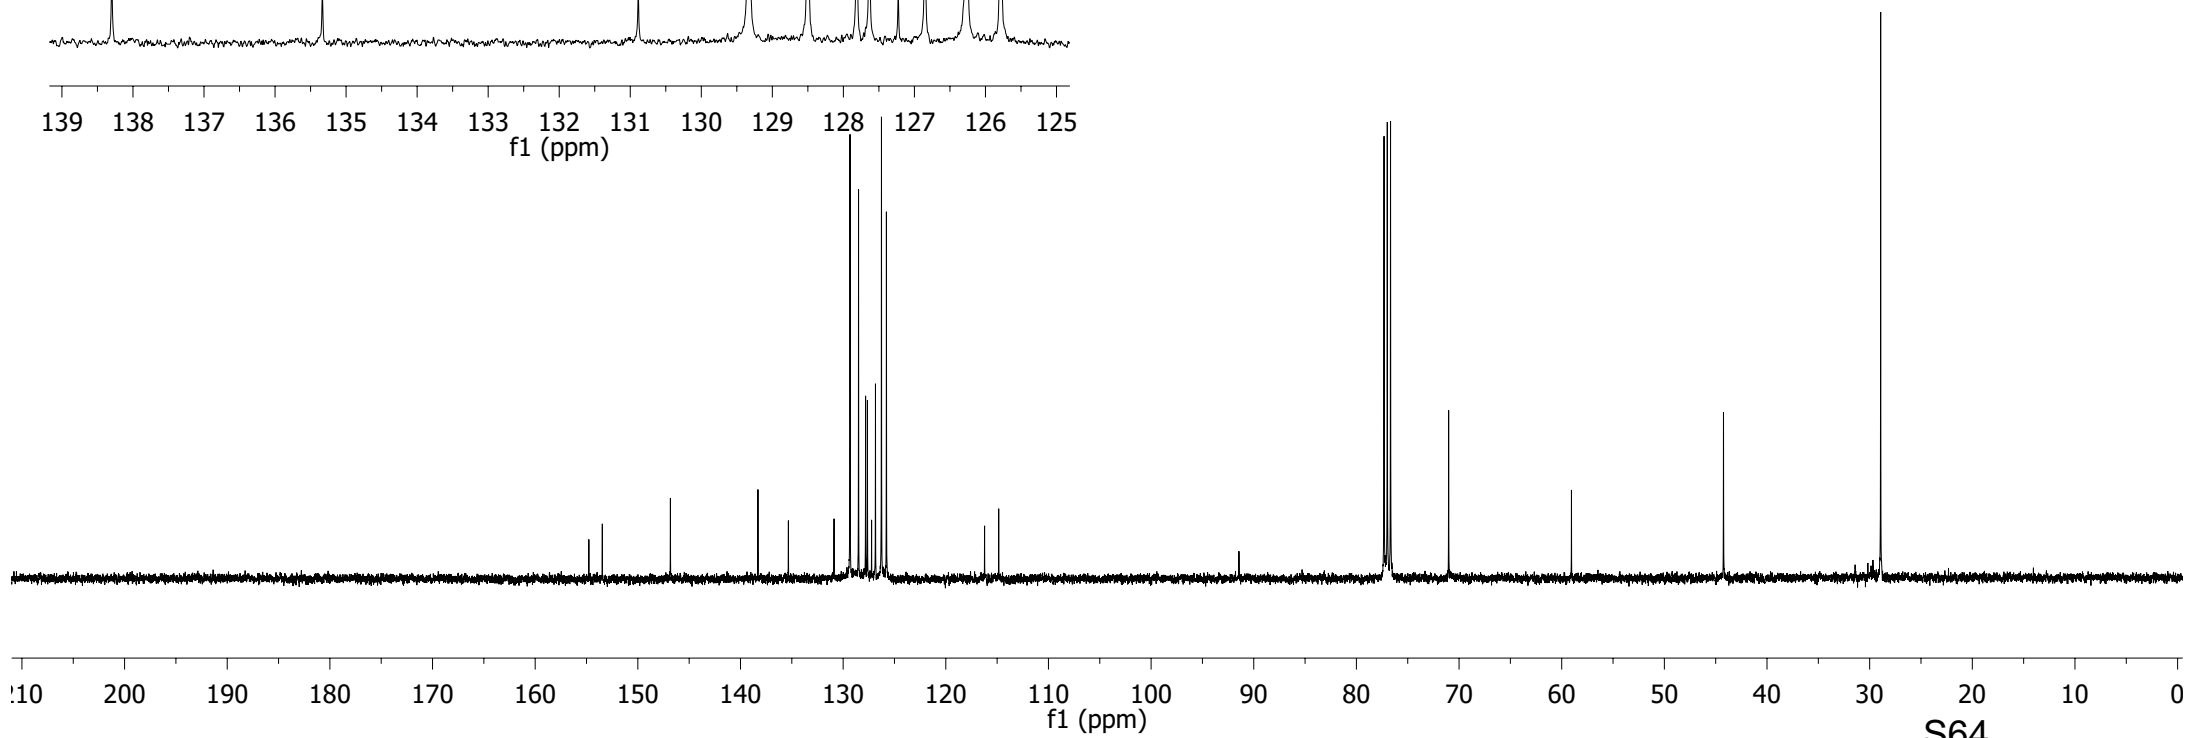

S64

Solvent  $\text{CDCl}_3$   
Spectrometer Frequency 400

7.630 7.628 7.612 7.609 7.476 7.472 7.468 7.456 7.455 7.453 7.413 7.408 7.395 7.391 7.378 7.373 7.359 7.356 7.344 7.340 7.326 7.322 7.308 7.303 7.300 7.297 7.283 7.280 7.269 7.265 7.262 7.252 7.247 7.242 7.235 7.232 7.229 7.226 7.218 7.214 7.192 5.035 5.025 5.004 4.994

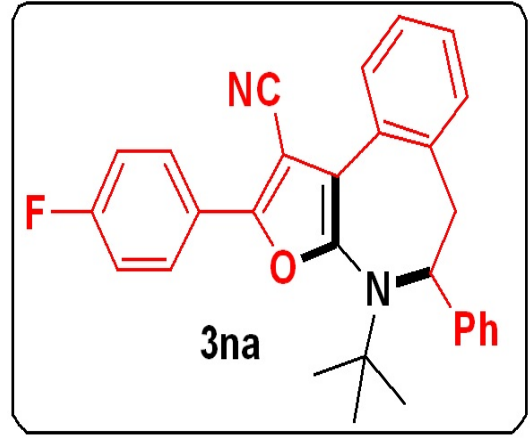

3.024 2.993 2.988 2.957 2.804 2.795 2.769 2.759

0.959

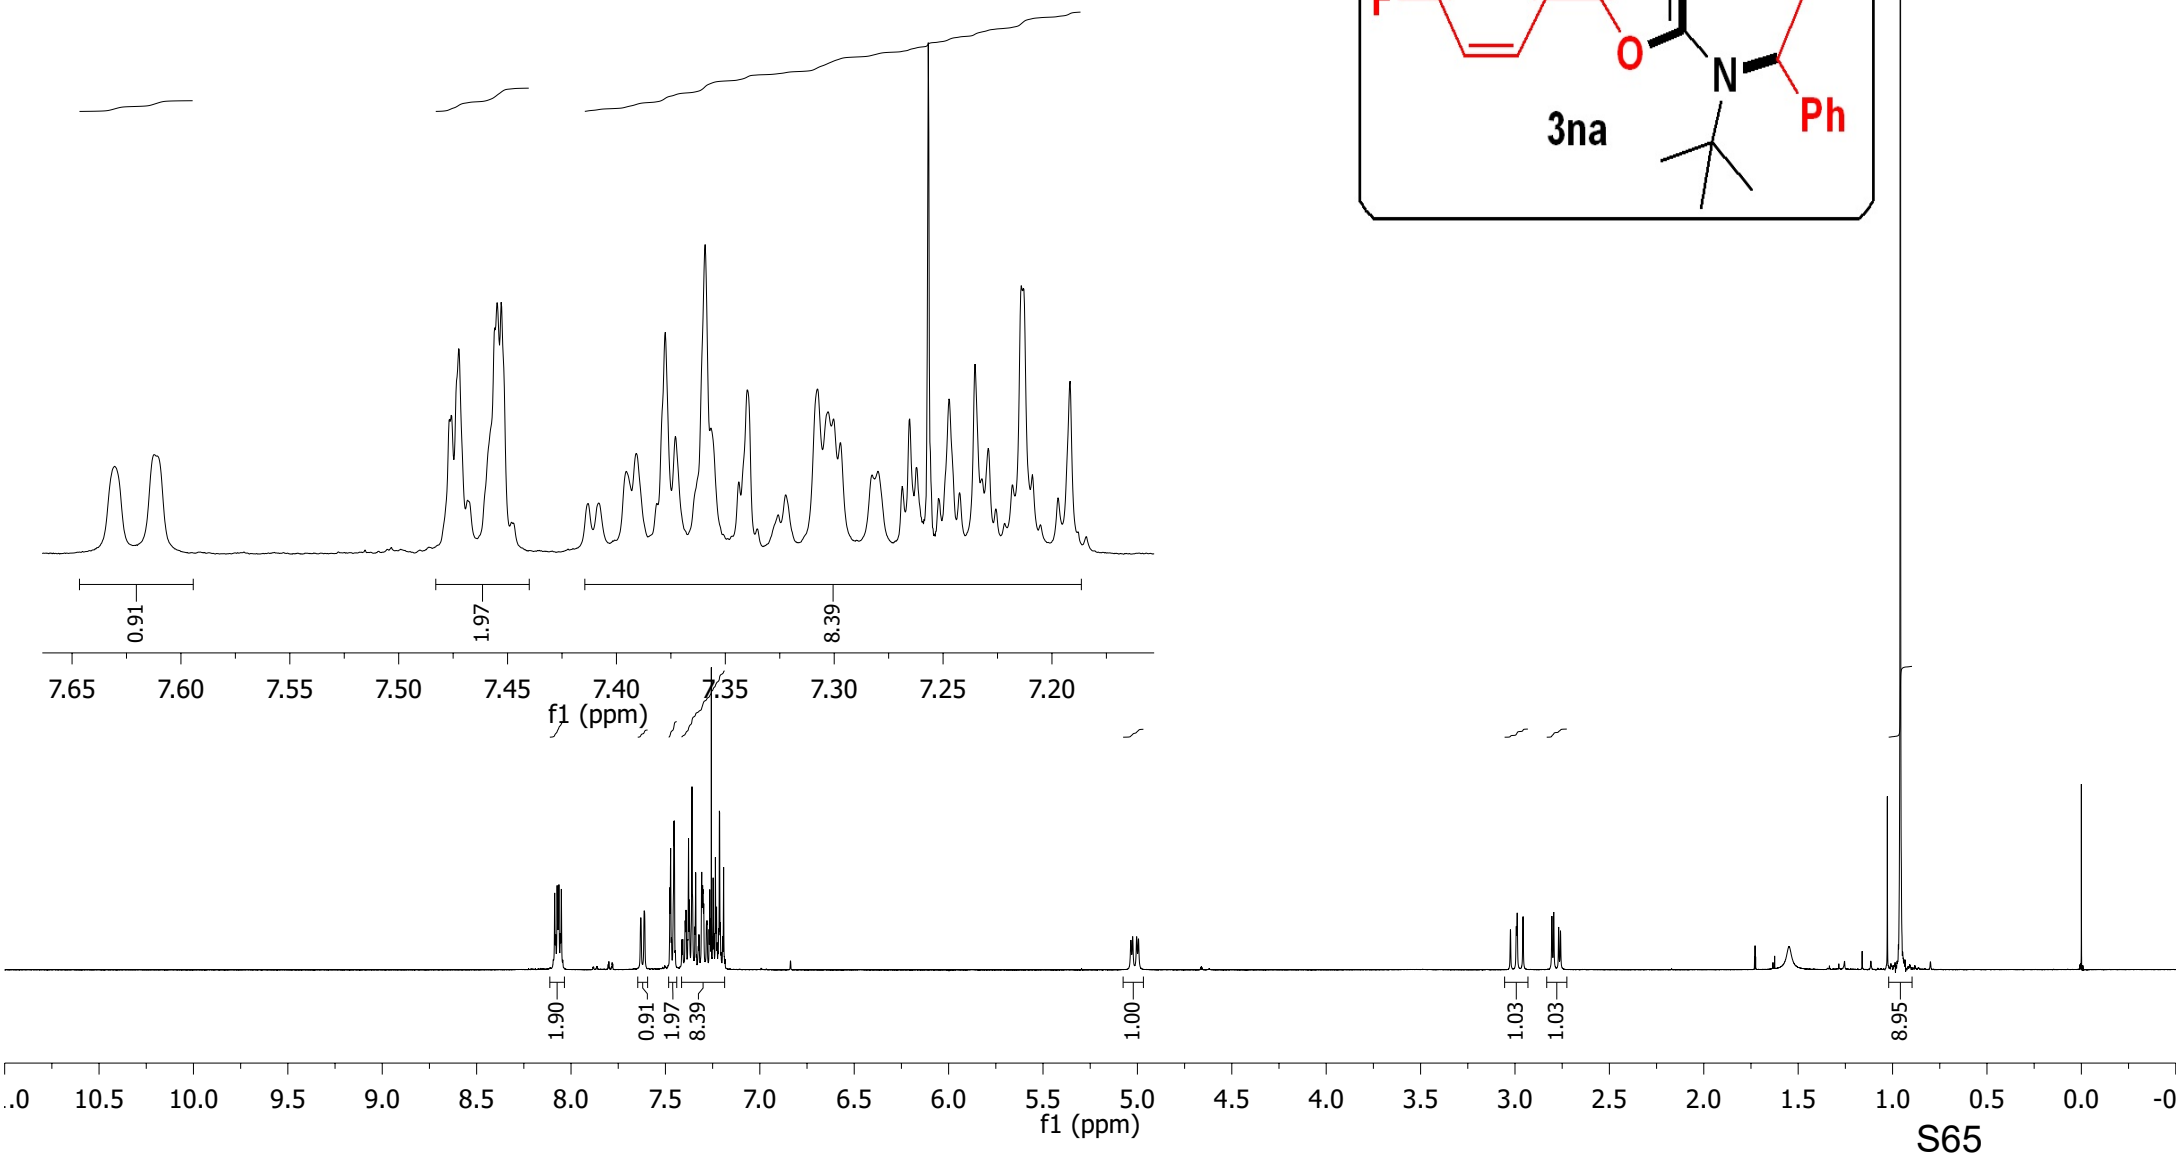

Solvent  $\text{CDCl}_3$   
Spectrometer Frequency 100

164.484  
161.990  
154.564  
153.916  
146.940  
138.366  
129.332  
128.507  
127.791  
127.643  
126.841  
125.814  
125.221  
125.187  
90.778  
77.311  
76.993  
76.676  
71.053  
59.026  
44.295  
28.910

131.020  
129.332  
128.507  
127.791  
127.643  
127.246  
127.163  
126.841  
126.300  
125.814  
125.221  
125.187

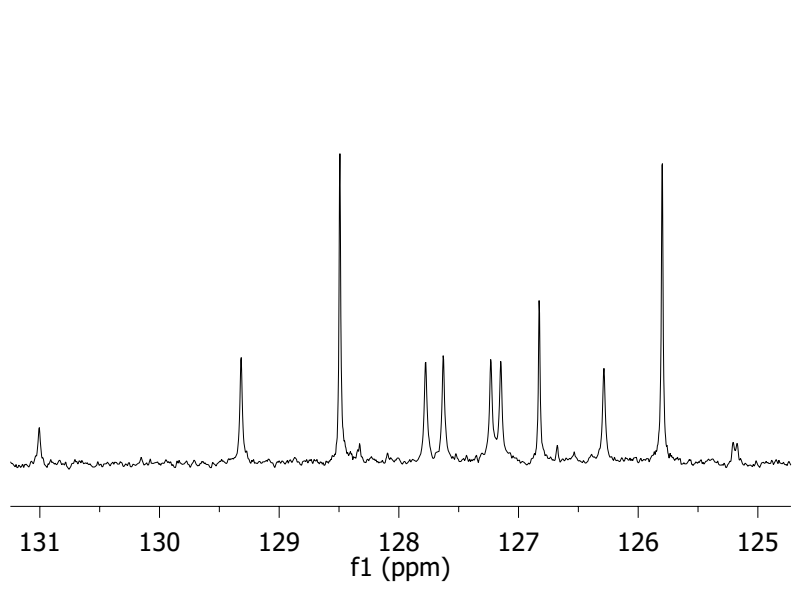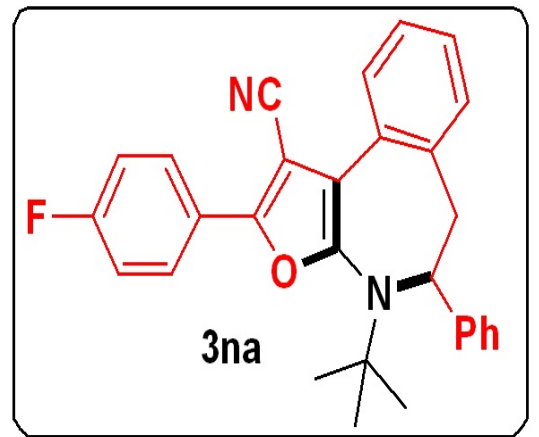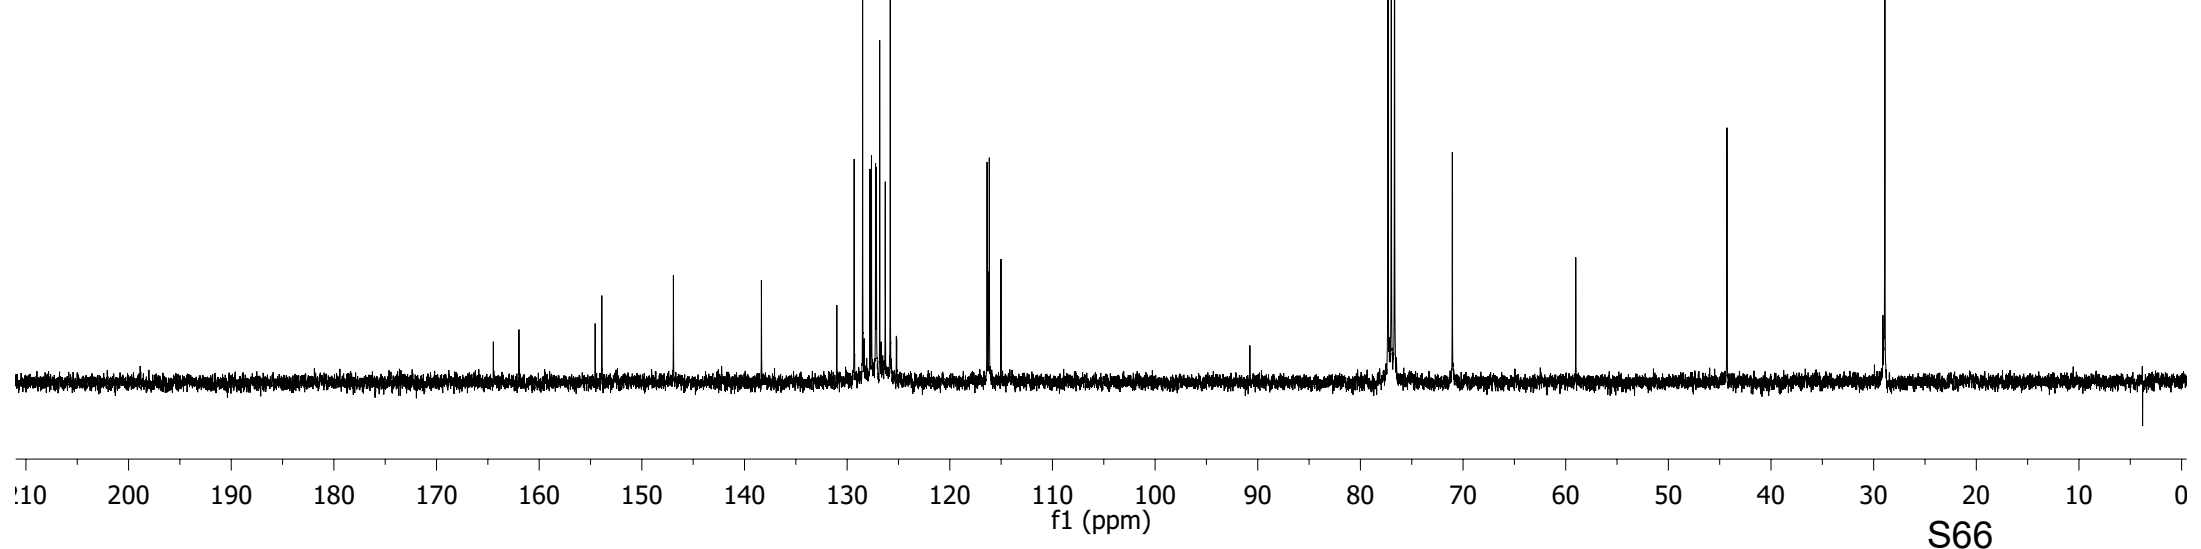

Solvent  $\text{CDCl}_3$   
Spectrometer Frequency 597

8.329  
8.327  
8.316  
8.314  
8.015  
7.632  
7.622  
7.620  
7.556  
7.543  
7.431  
7.418  
7.416  
7.392  
7.377  
7.364  
7.354  
7.352  
7.339  
7.327  
7.290  
7.279  
7.277  
7.242  
5.031  
5.024  
5.010  
5.003

3.911  
3.038  
3.017  
3.014  
2.993  
2.791  
2.785  
2.767  
2.761

8.329  
8.327  
8.316  
8.314

8.015

7.634  
7.632  
7.622  
7.620  
7.556  
7.543  
7.418  
7.377  
7.364  
7.352  
7.339  
7.327  
7.277  
7.242

3.038  
3.017  
3.014  
2.993

2.791  
2.785  
2.767  
2.761

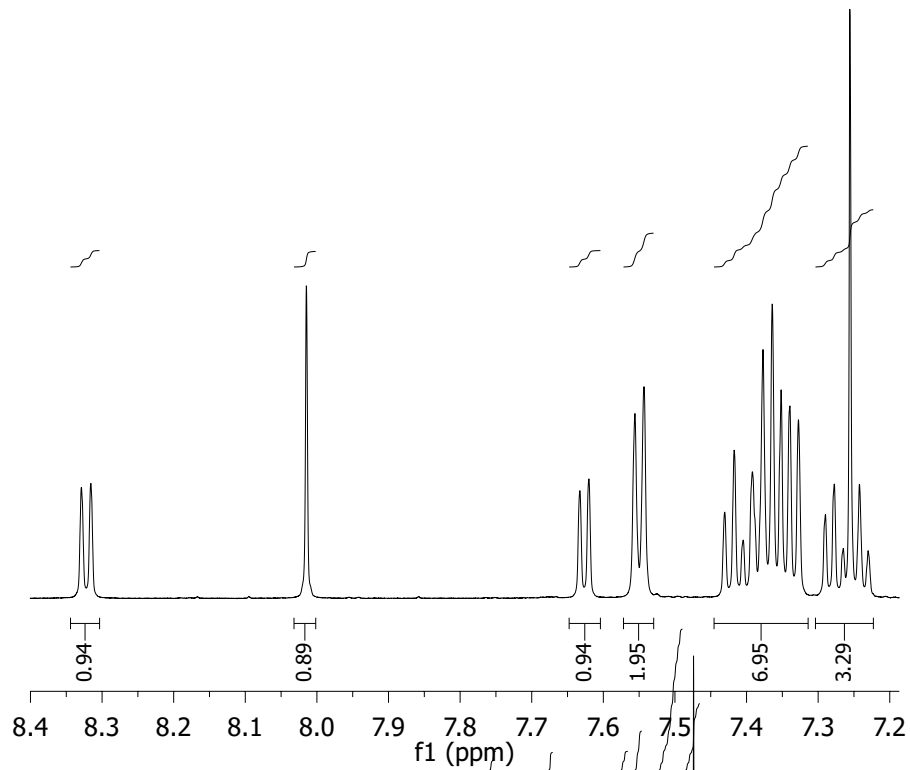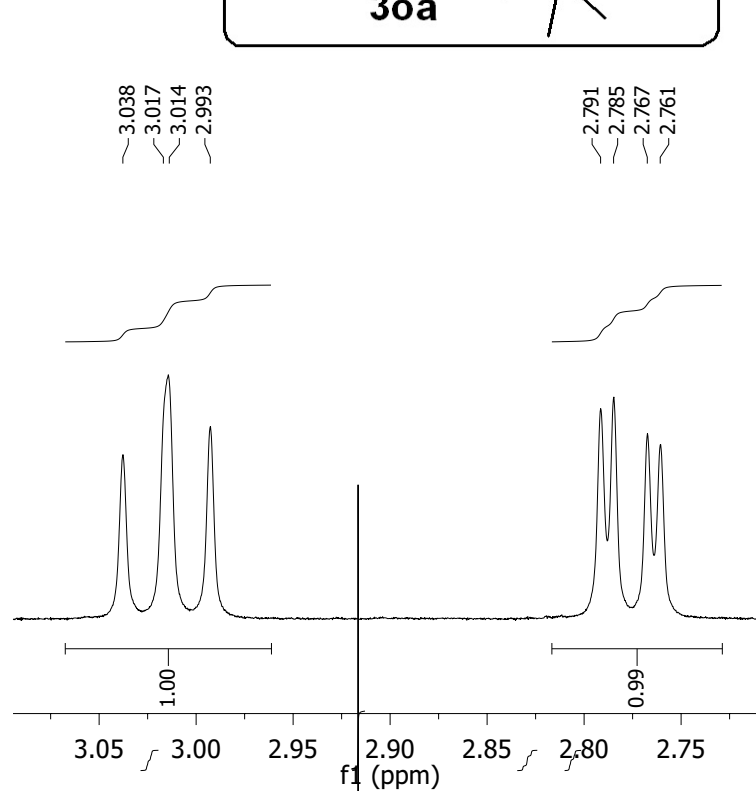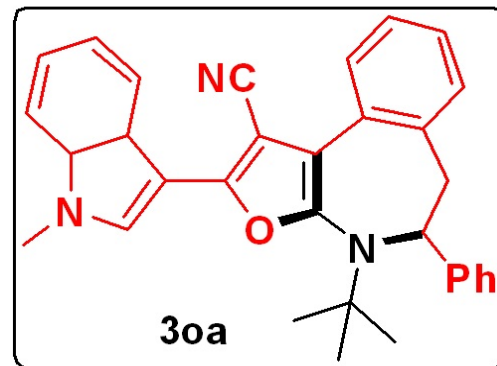

10.5 10.0 9.5 9.0 8.5 8.0 7.5 7.0 6.5 6.0 5.5 5.0 4.5 4.0 3.5 3.0 2.5 2.0 1.5 1.0 0.5 0.0

S67

Solvent  $\text{CDCl}_3$   
Spectrometer Frequency 150

155.167  
152.916  
147.370  
138.633  
136.801  
128.739  
128.486  
127.505  
126.336  
125.888  
121.477  
116.175  
115.689  
109.834  
105.608  
86.514  
77.204  
76.991  
76.779  
71.241  
59.187  
44.485  
33.377  
28.822

155.167  
152.916  
147.370  
138.633  
136.801  
131.762  
129.298  
128.739  
128.486  
127.555  
127.505  
126.674  
126.336  
125.888  
125.131  
123.054  
121.427  
121.377  
116.175  
115.689

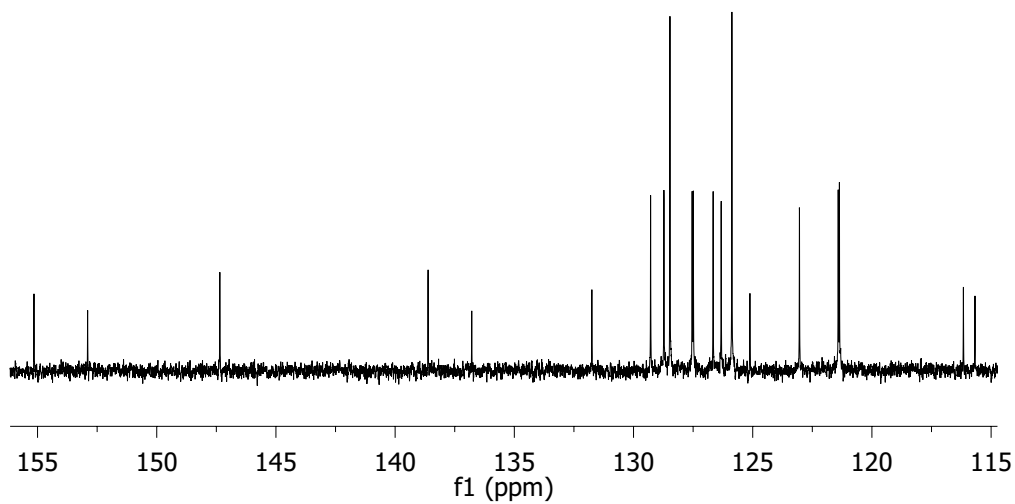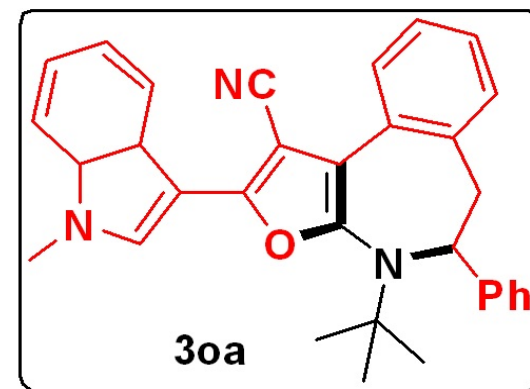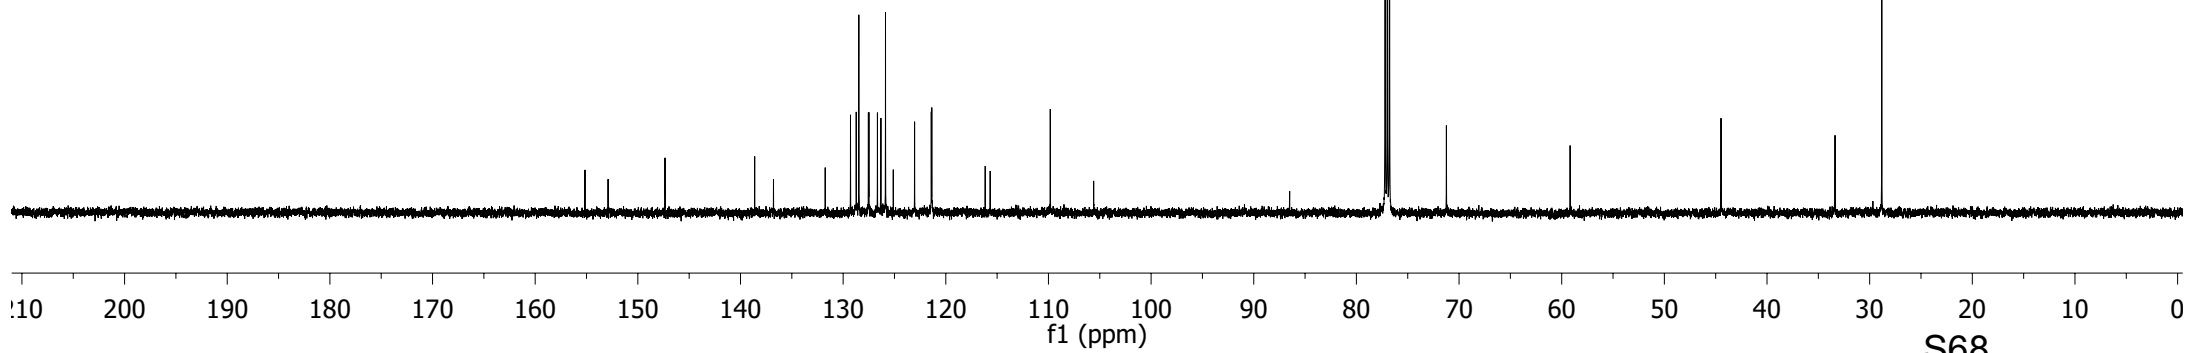



Solvent  $\text{CDCl}_3$   
Spectrometer Frequency 400

8.087  
8.084  
8.070  
8.066  
7.519  
7.388  
7.383  
7.366  
7.291  
6.900  
6.888  
6.883

5.005  
4.996  
4.975  
4.965

3.811  
3.008  
2.977  
2.972  
2.941  
2.774  
2.765  
2.739  
2.729

0.968

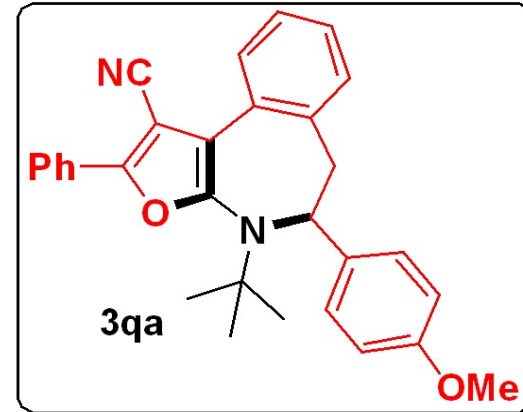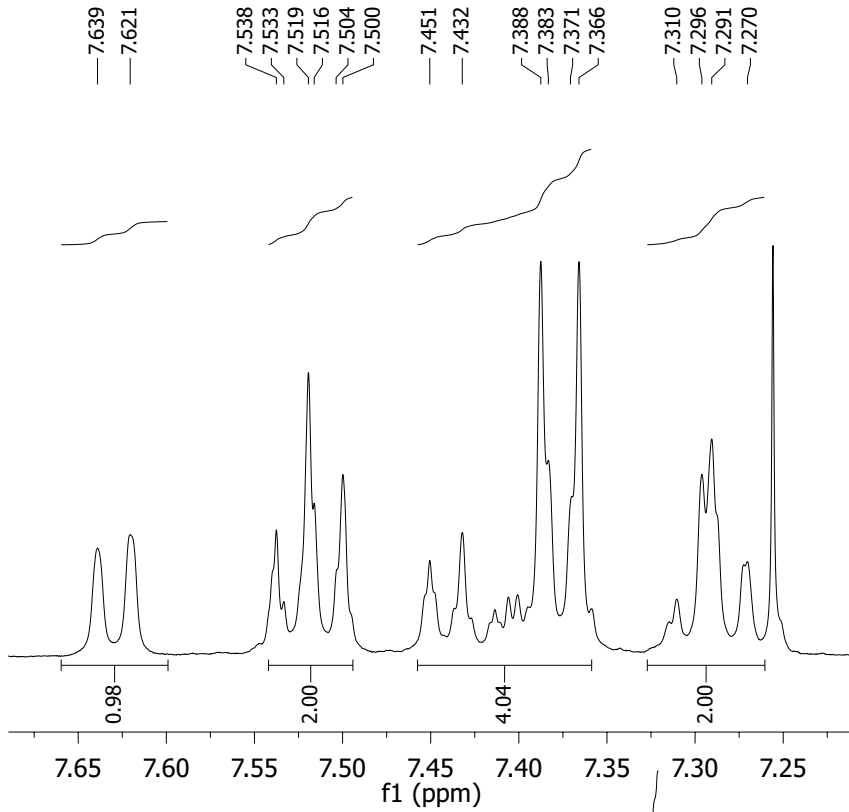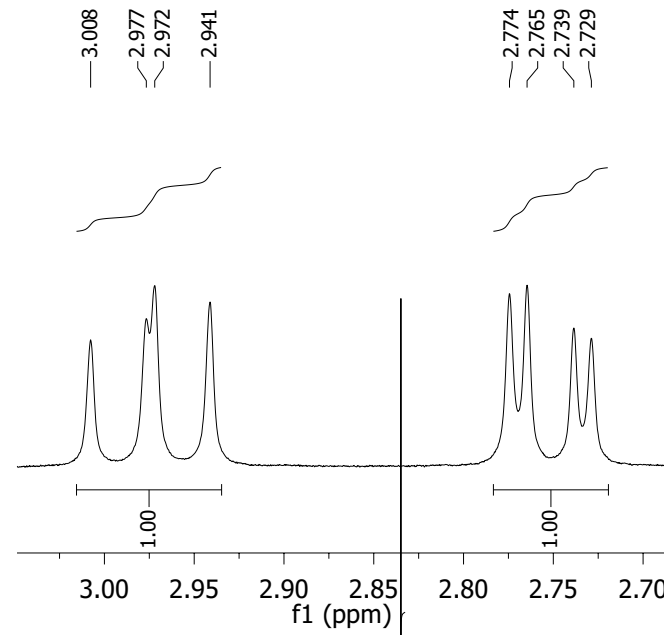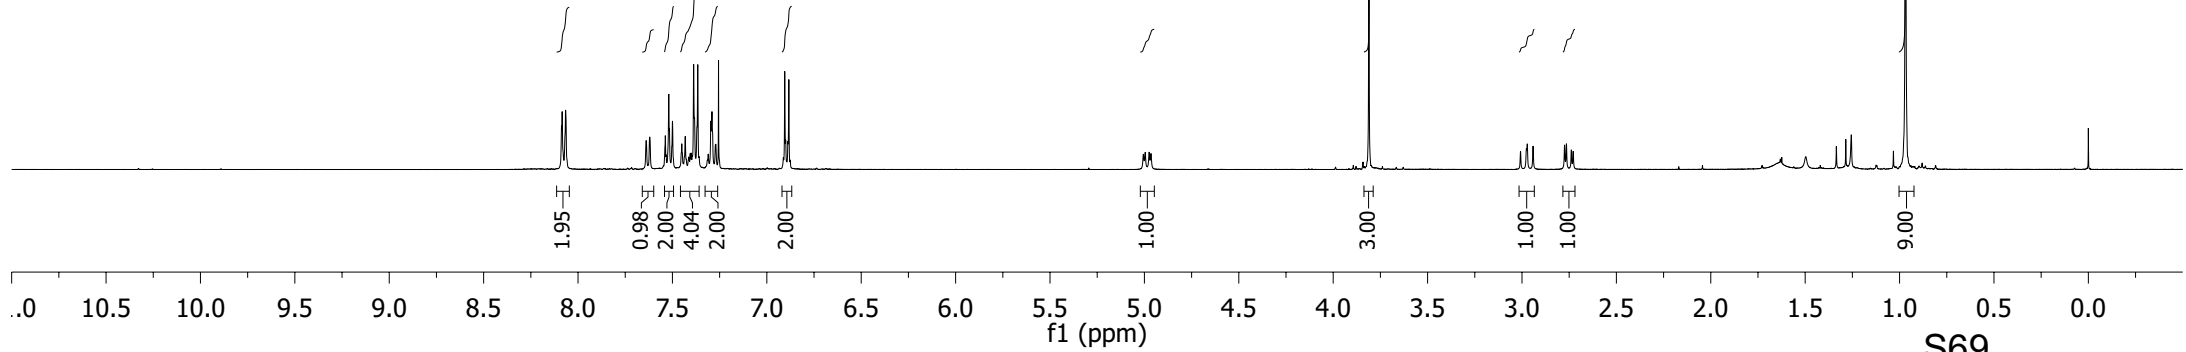

Solvent  $\text{CDCl}_3$   
Spectrometer Frequency 100

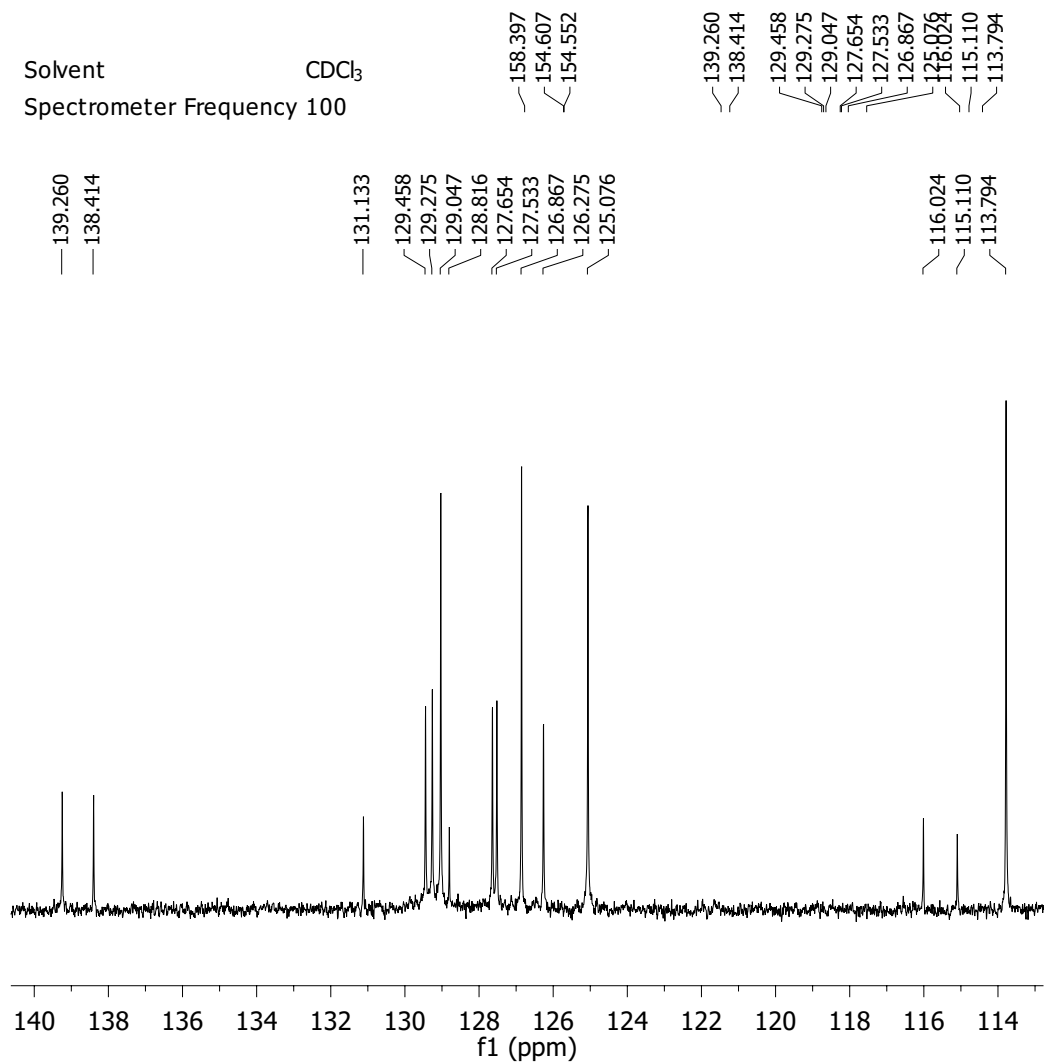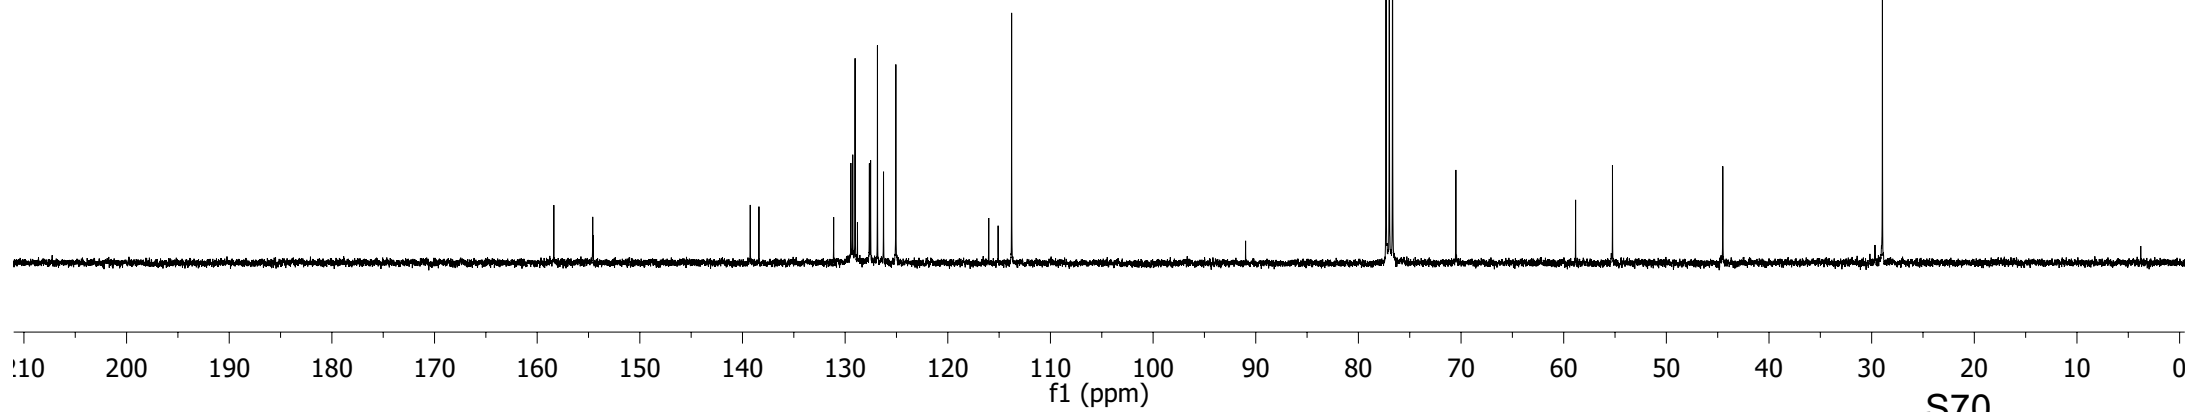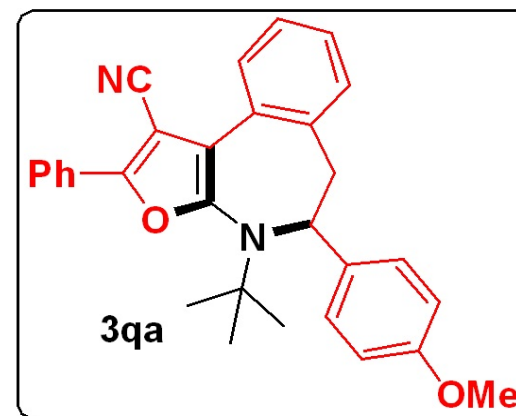

Solvent  $\text{CDCl}_3$   
Spectrometer Frequency 400

8.092  
8.088  
8.083  
8.074  
8.070  
8.062  
7.641  
7.622  
7.619  
7.539  
7.521  
7.501  
7.456  
7.453  
7.449  
7.439  
7.434  
7.428  
7.415  
7.407  
7.402  
7.389  
7.384  
7.371  
7.366  
7.362  
7.357  
7.346  
7.342  
7.342  
7.342  
7.299  
7.295  
7.291  
7.288  
7.274  
7.174  
5.012  
5.002  
4.982  
4.972

7.641  
7.638  
7.622  
7.619  
7.539  
7.534  
7.521  
7.517  
7.501  
7.456  
7.453  
7.449  
7.439  
7.434  
7.428  
7.415  
7.407  
7.402  
7.389  
7.384  
7.371  
7.366  
7.362  
7.357  
7.346  
7.342  
7.342  
7.299  
7.295  
7.291  
7.288  
7.274  
7.270  
7.174  
7.154

3.015  
2.984  
2.979  
2.949  
2.781  
2.771  
2.745  
2.735  
2.349

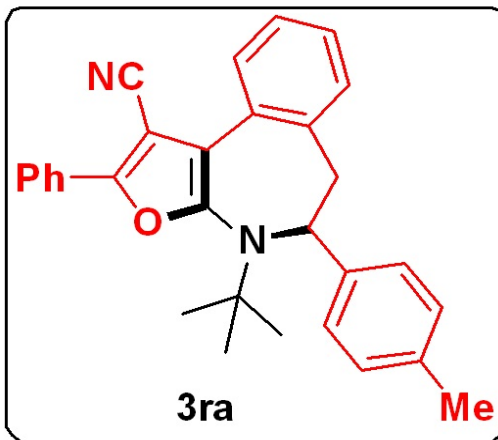

0.966

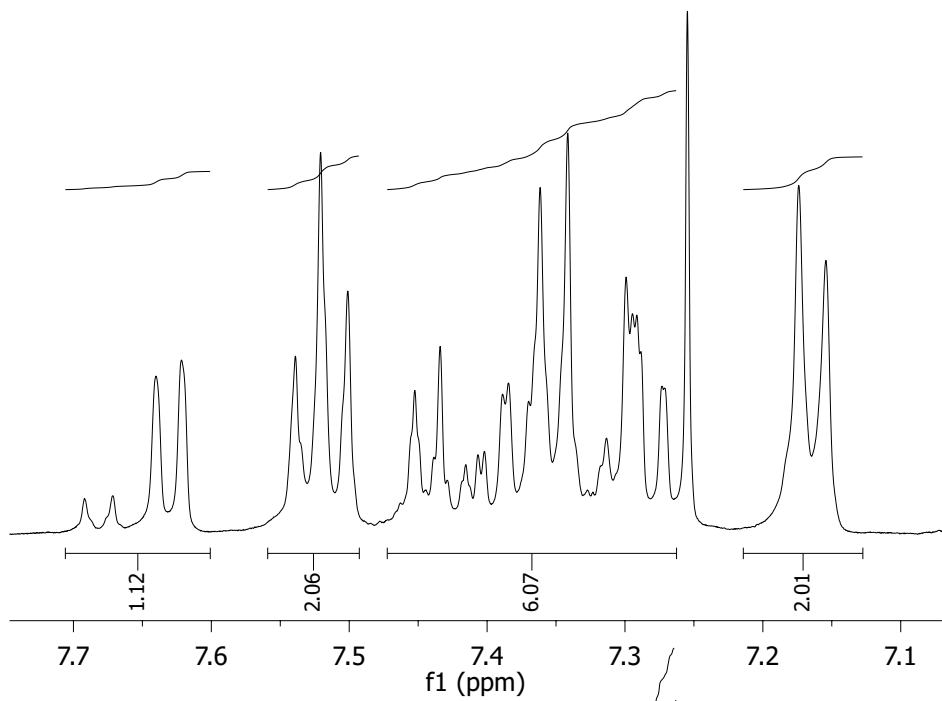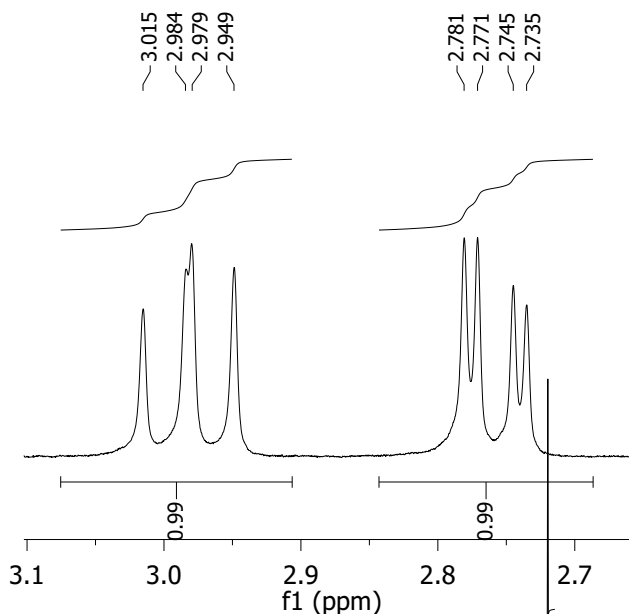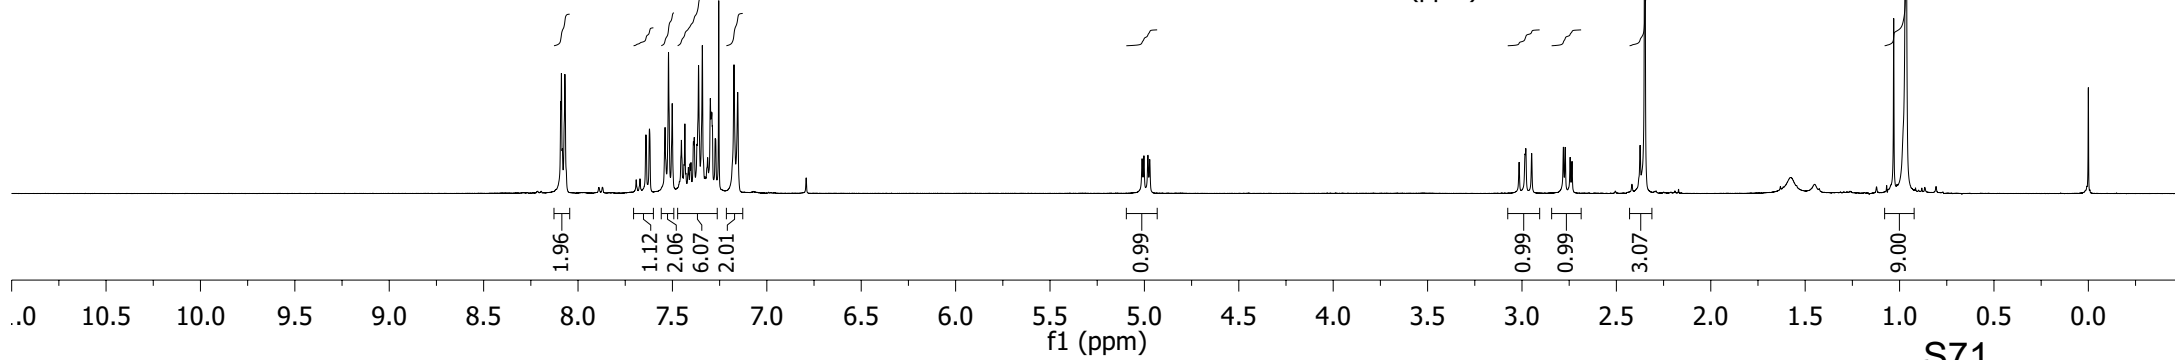

S71

Solvent  $\text{CDCl}_3$   
Spectrometer Frequency 100

154.622  
154.592  
144.080  
138.441  
136.358  
129.455  
129.148  
129.046  
126.279  
125.742  
125.081  
116.096  
115.117

90.985

77.307  
76.990  
76.673  
70.856

58.887

44.413

28.949

21.085

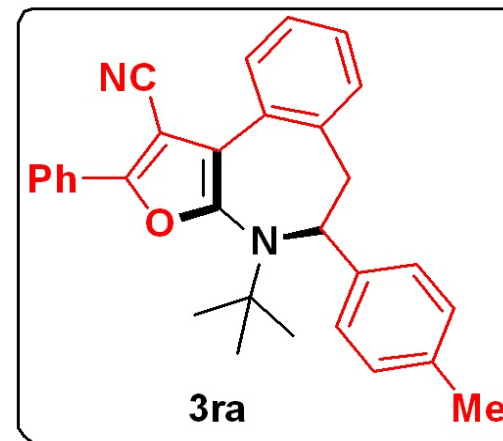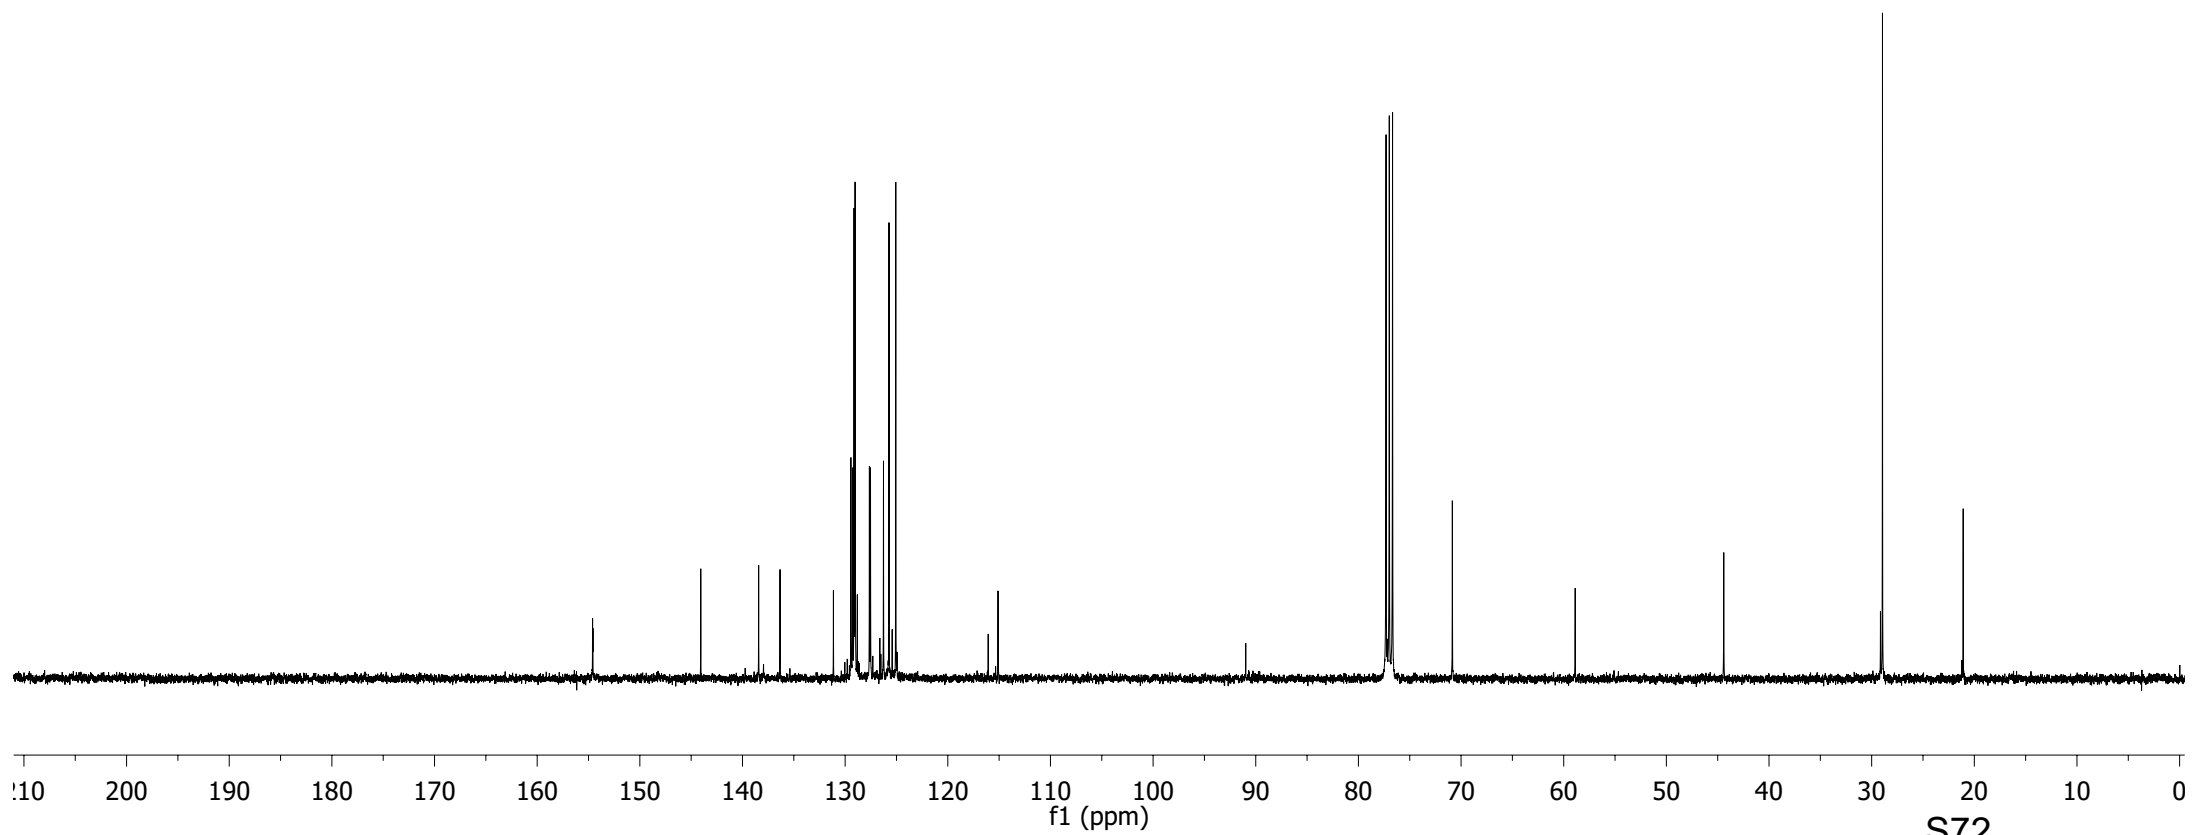

Solvent  $\text{CDCl}_3$   
Spectrometer Frequency 400

8.086  
8.082  
8.077  
8.068  
8.065  
8.062  
7.647  
7.628  
7.544  
7.526  
7.506  
7.462  
7.459  
7.444  
7.426  
7.421  
7.410  
7.405  
7.398  
7.382  
7.376  
7.343  
7.337  
7.332  
7.321  
7.316  
7.311  
7.298  
7.295  
7.282  
7.279

2.989  
2.958  
2.953  
2.922  
2.770  
2.760  
2.734  
2.724

0.950

7.647  
7.644  
7.628  
7.625  
7.544  
7.540  
7.526  
7.522  
7.506  
7.465  
7.462  
7.459  
7.444  
7.426  
7.421  
7.410  
7.405  
7.398  
7.382  
7.376  
7.343  
7.337  
7.332  
7.321  
7.316  
7.311  
7.298  
7.295  
7.282  
7.279

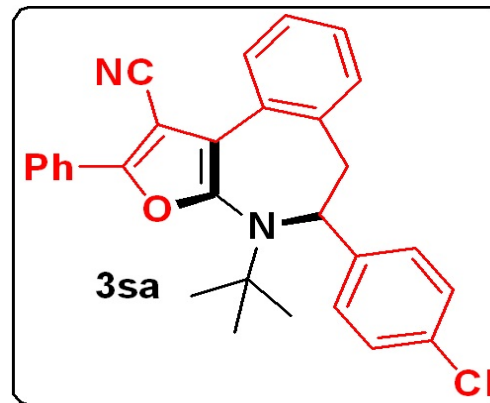

2.989  
2.958  
2.953  
2.922

2.770  
2.760  
2.734  
2.724

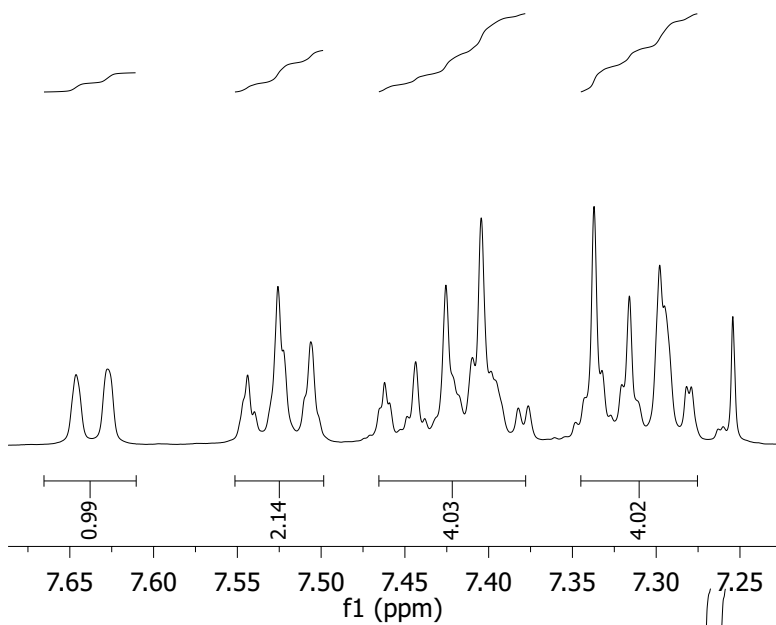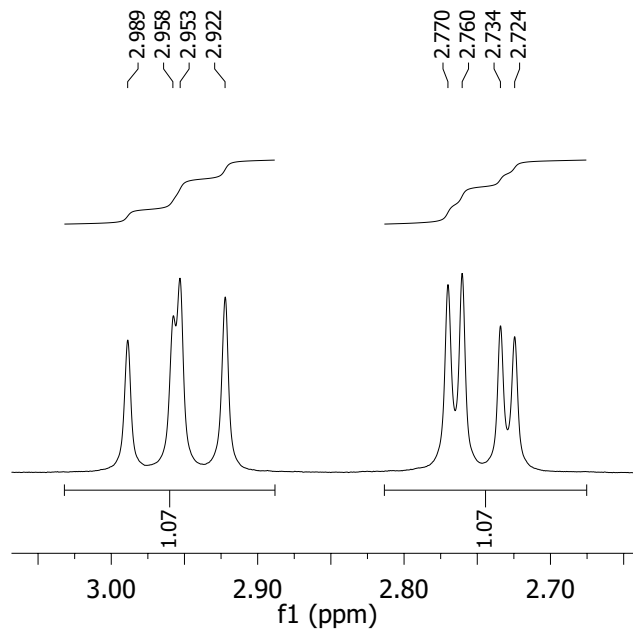

2.04  
0.99  
2.14  
4.03  
4.02

1.07

1.07  
1.07

9.00

2.5 11.5 10.5 9.5 9.0 8.5 8.0 7.5 7.0 6.5 6.0 5.5 5.0 4.5 4.0 3.5 3.0 2.5 2.0 1.5 1.0 0.5 0.0 -0.5 -1.5

f1 (ppm)

Solvent  $\text{CDCl}_3$   
Spectrometer Frequency 100

154.880  
154.206  
145.525  
137.974  
129.614  
129.084  
128.660  
127.819  
127.240  
126.385  
125.117  
116.446  
114.968

91.059

77.308  
76.991  
76.673

70.242

59.137

44.116

28.837

132.392

130.982

129.614

129.296

129.084

128.682

128.660

127.819

127.751

127.240

126.385

125.117

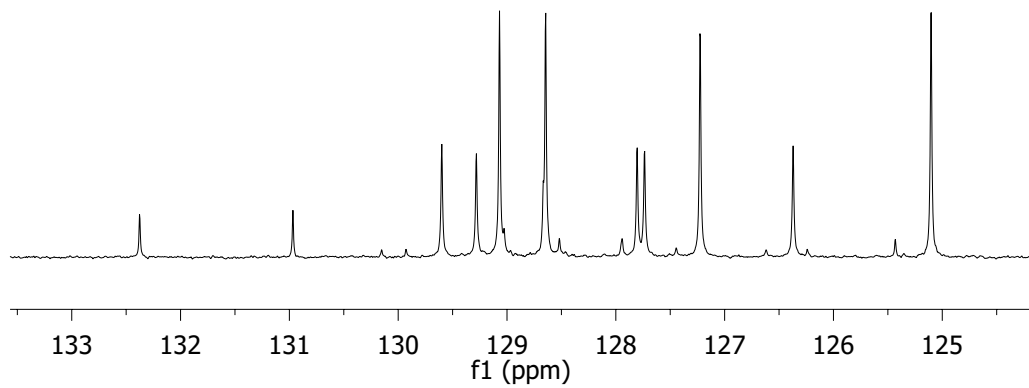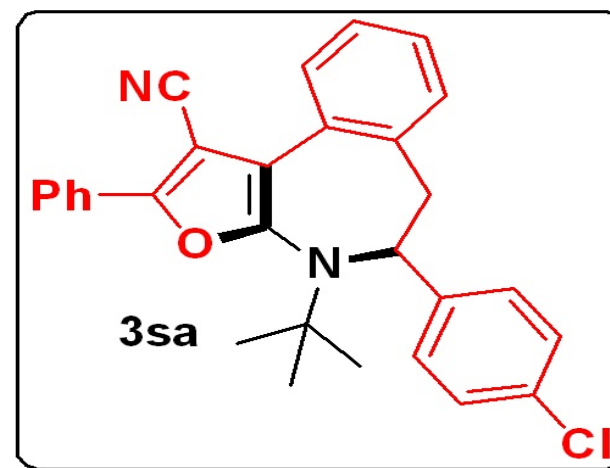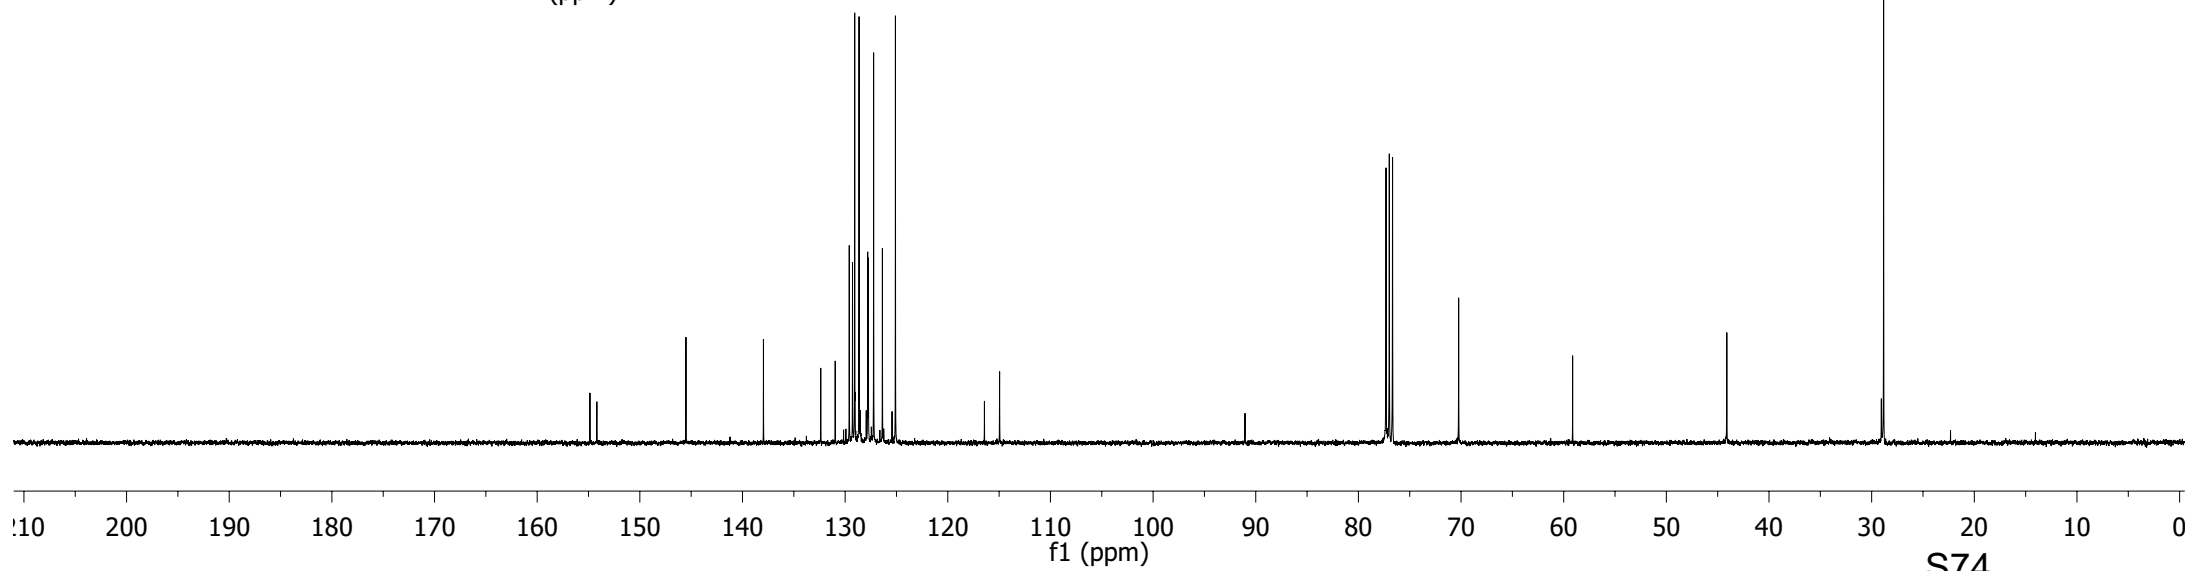

Solvent CDCl<sub>3</sub>  
Spectrometer Frequency 400

8.084  
8.081  
8.076  
8.067  
8.063  
8.060  
7.645  
7.626  
7.545  
7.541  
7.527  
7.523  
7.511  
7.507  
7.494  
7.489  
7.478  
7.473  
7.466  
7.463  
7.444  
7.419  
7.403  
7.397  
7.384  
7.378  
7.371  
7.366  
7.350  
7.299  
7.294  
7.270  
7.269  
4.969  
4.979  
4.958  
4.948

2.987  
2.956  
2.951  
2.921  
2.768  
2.759  
2.733  
2.723

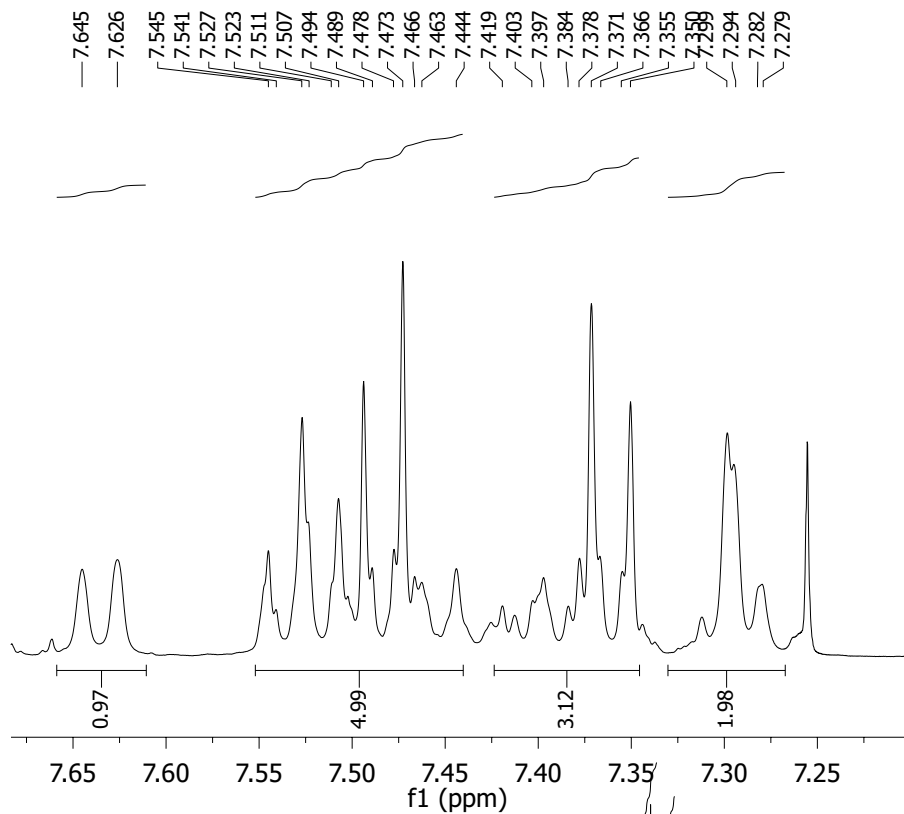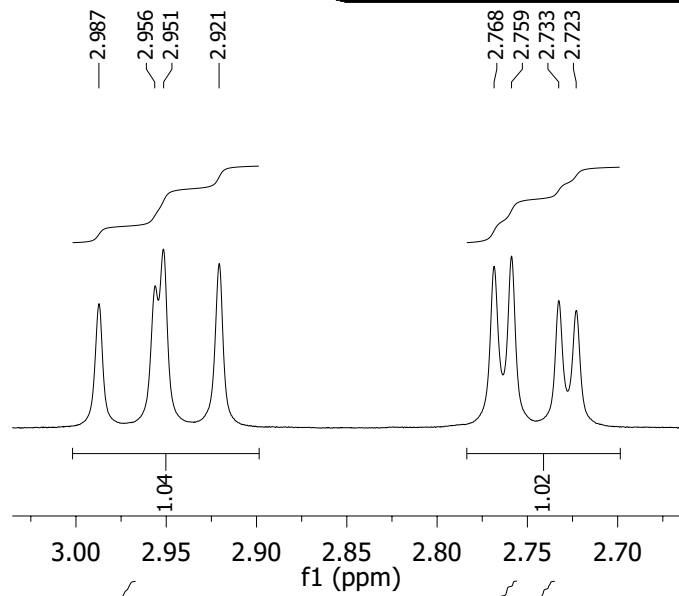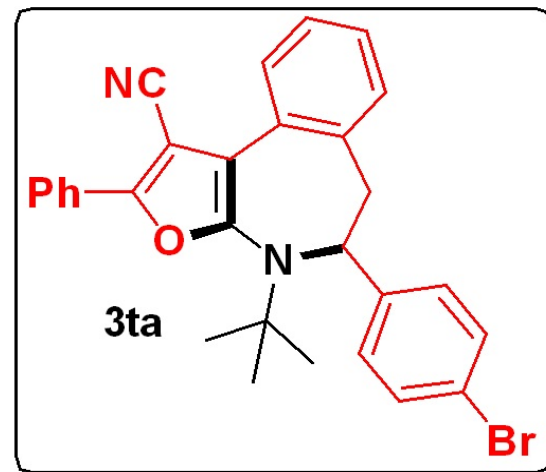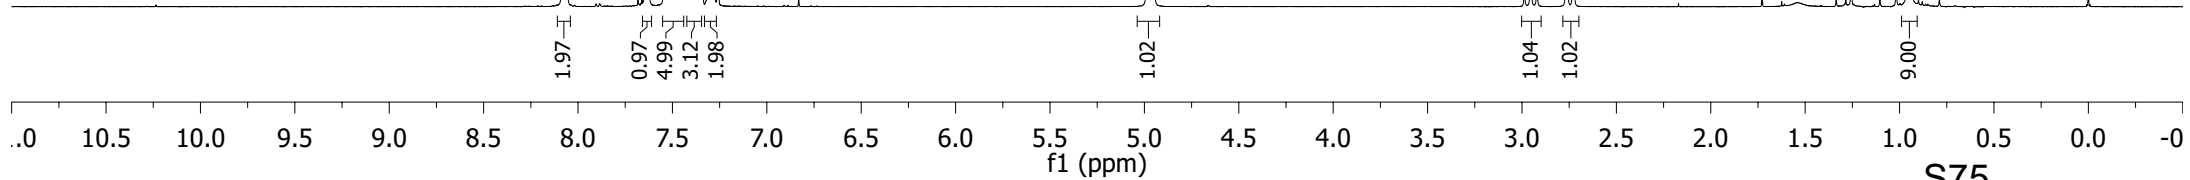

Solvent  $\text{CDCl}_3$   
Spectrometer Frequency 100

154.902  
154.182  
146.056  
137.954  
131.615  
130.971  
129.634  
129.296  
129.081  
129.046  
128.667  
127.838  
127.760  
127.636  
126.400  
125.127  
120.472  
116.480  
114.972  
91.056  
77.309  
76.992  
76.674  
70.280  
59.152  
44.049  
28.842

131.615  
130.971  
129.634  
129.296  
129.081  
129.046  
128.667  
127.838  
127.760  
127.636  
126.400  
125.127

120.472  
116.480  
114.972

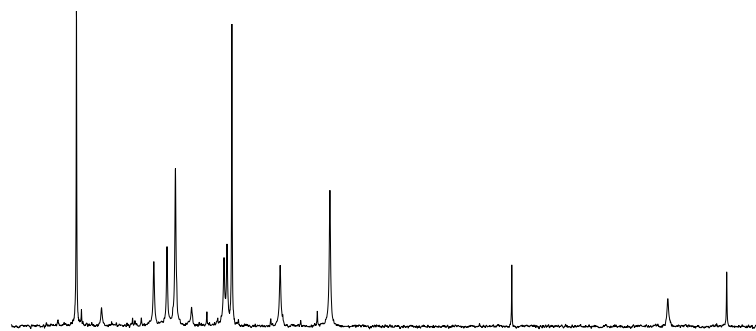

132 130 128 126 124 122 120 118 116  
f1 (ppm)

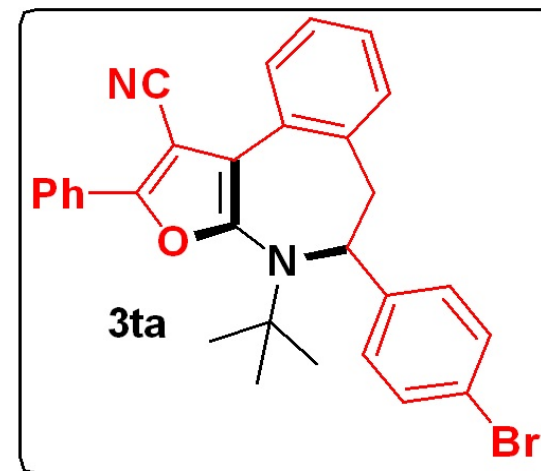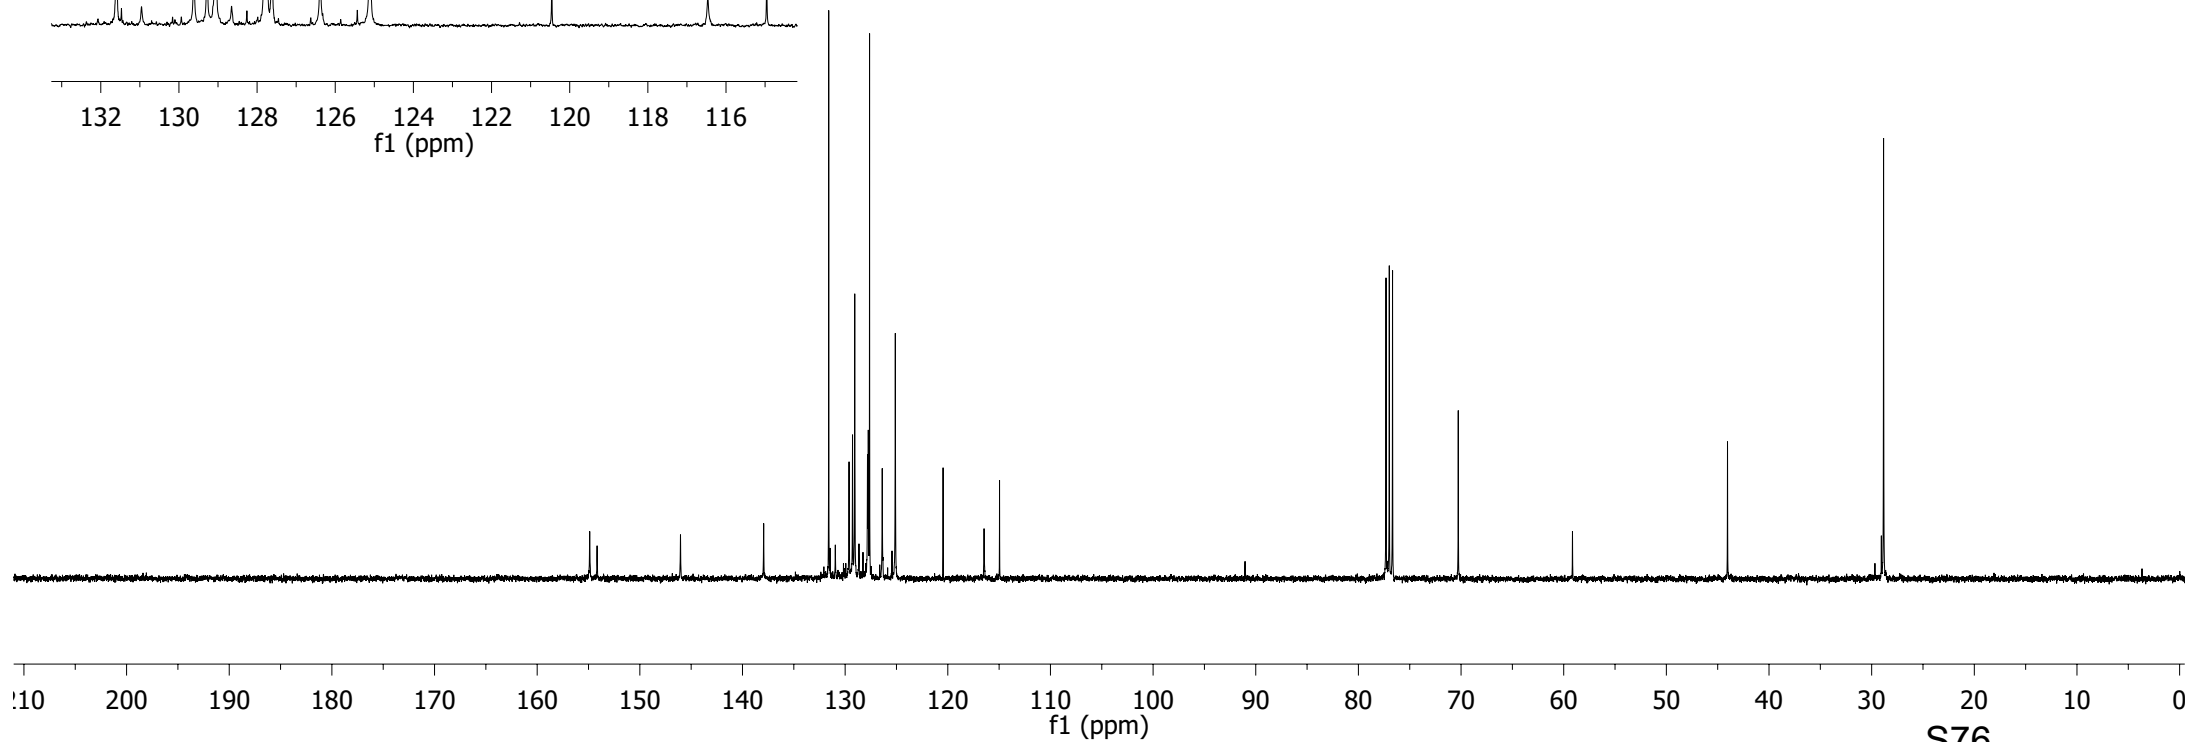



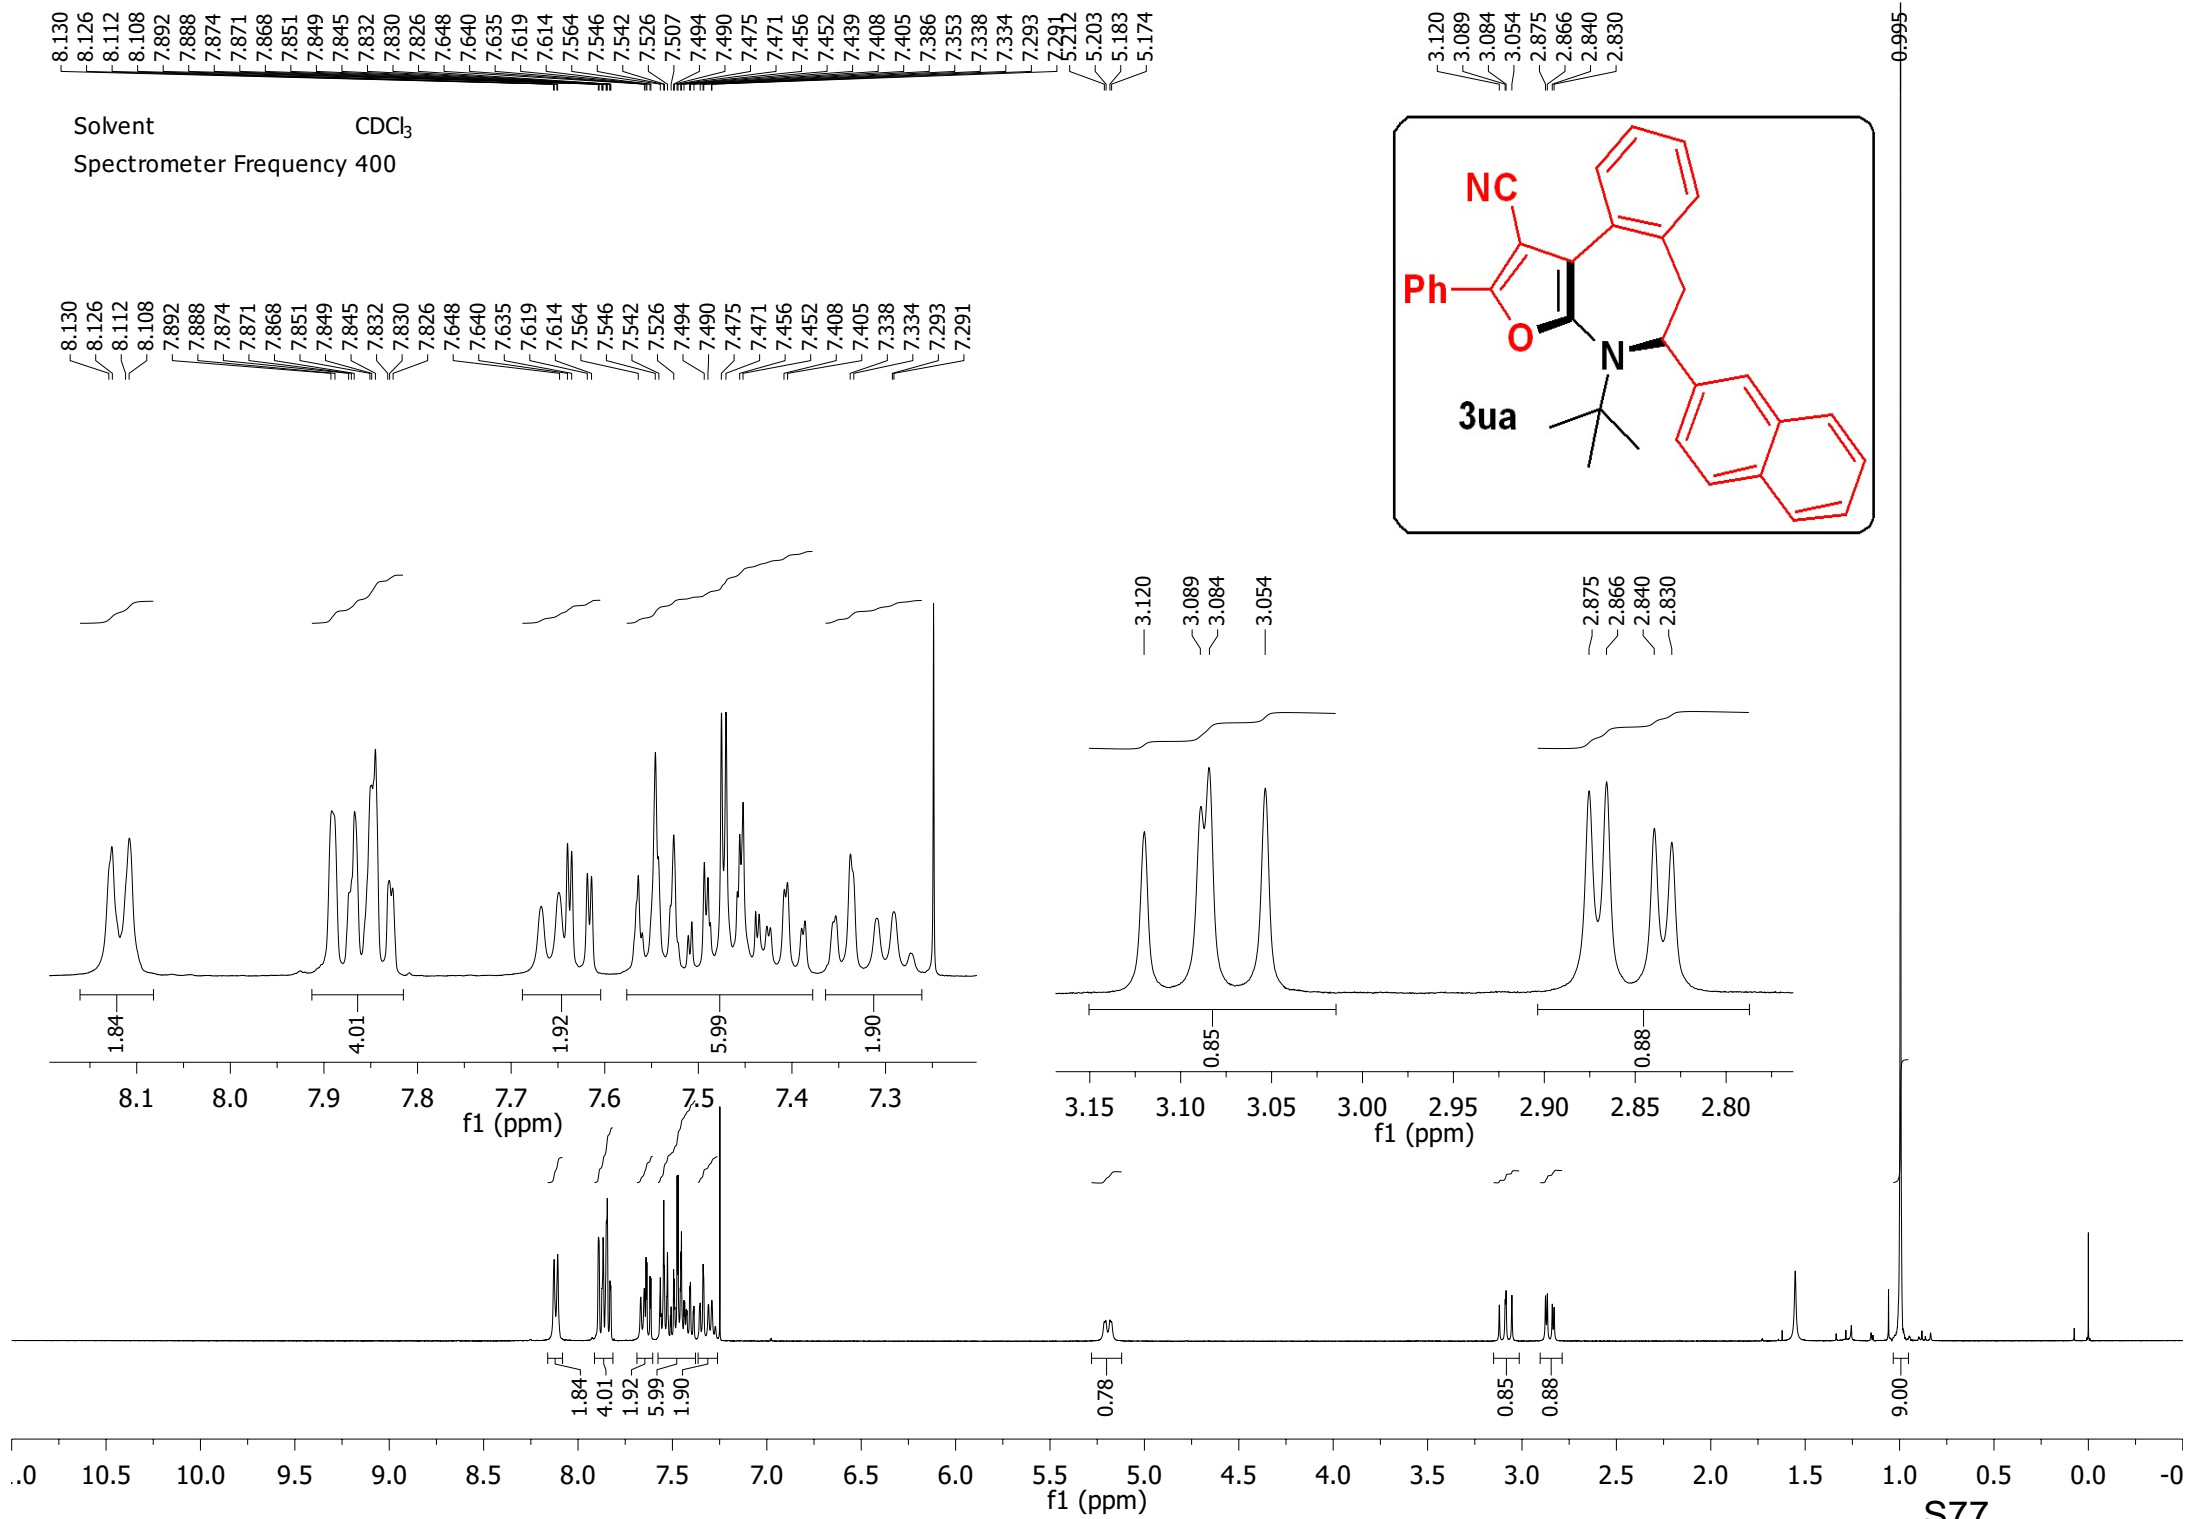

Solvent  $\text{CDCl}_3$   
Spectrometer Frequency 100

154.765  
154.561  
144.437  
129.336  
129.098  
128.388  
127.849  
127.719  
126.097  
125.604  
125.123  
124.479  
124.158  
116.227  
115.081

91.089

77.308  
76.991  
76.673  
71.207

59.087

44.222

28.987

133.439  
132.638  
131.136

129.535  
129.336  
129.098  
128.838  
128.388  
127.849  
127.754  
127.719  
127.651  
126.367  
126.097  
125.604  
125.123  
124.479  
124.158

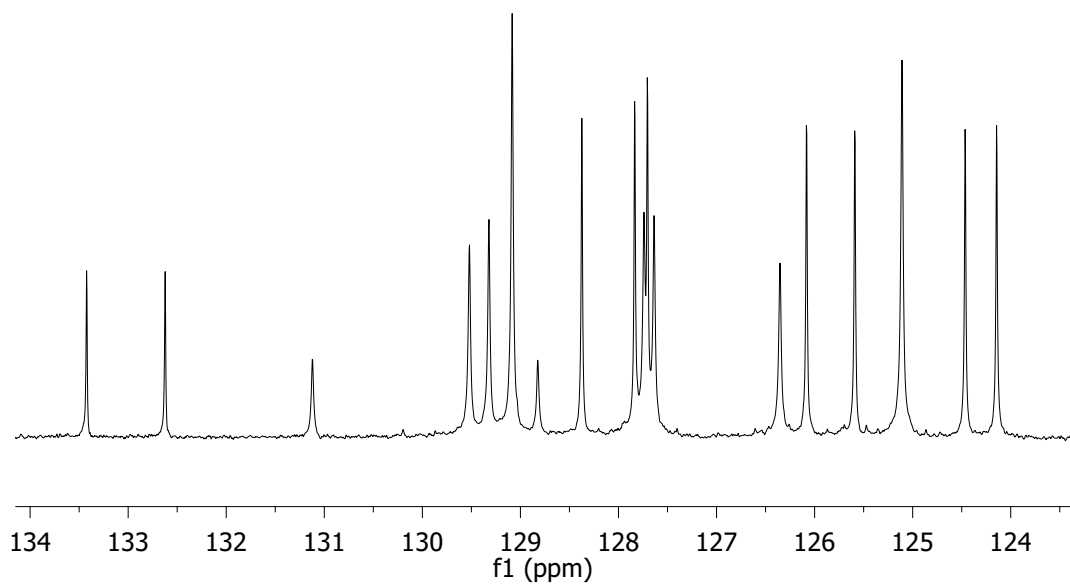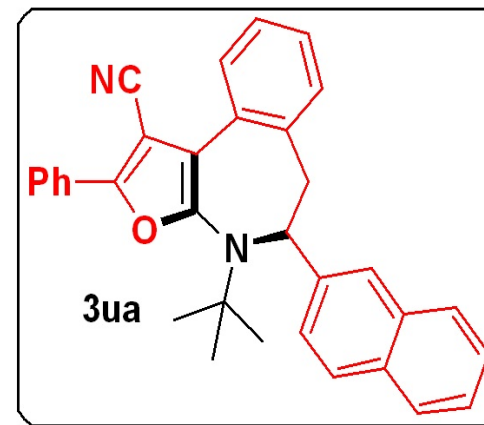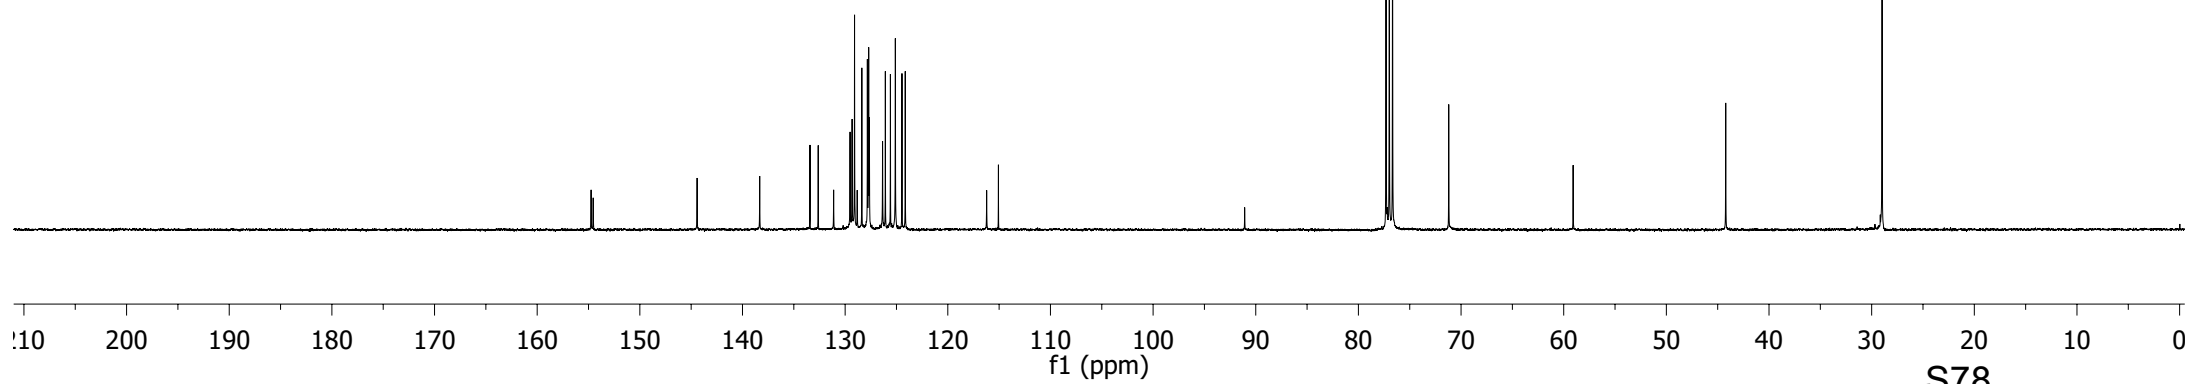

Solvent  $\text{CDCl}_3$   
Spectrometer Frequency 597

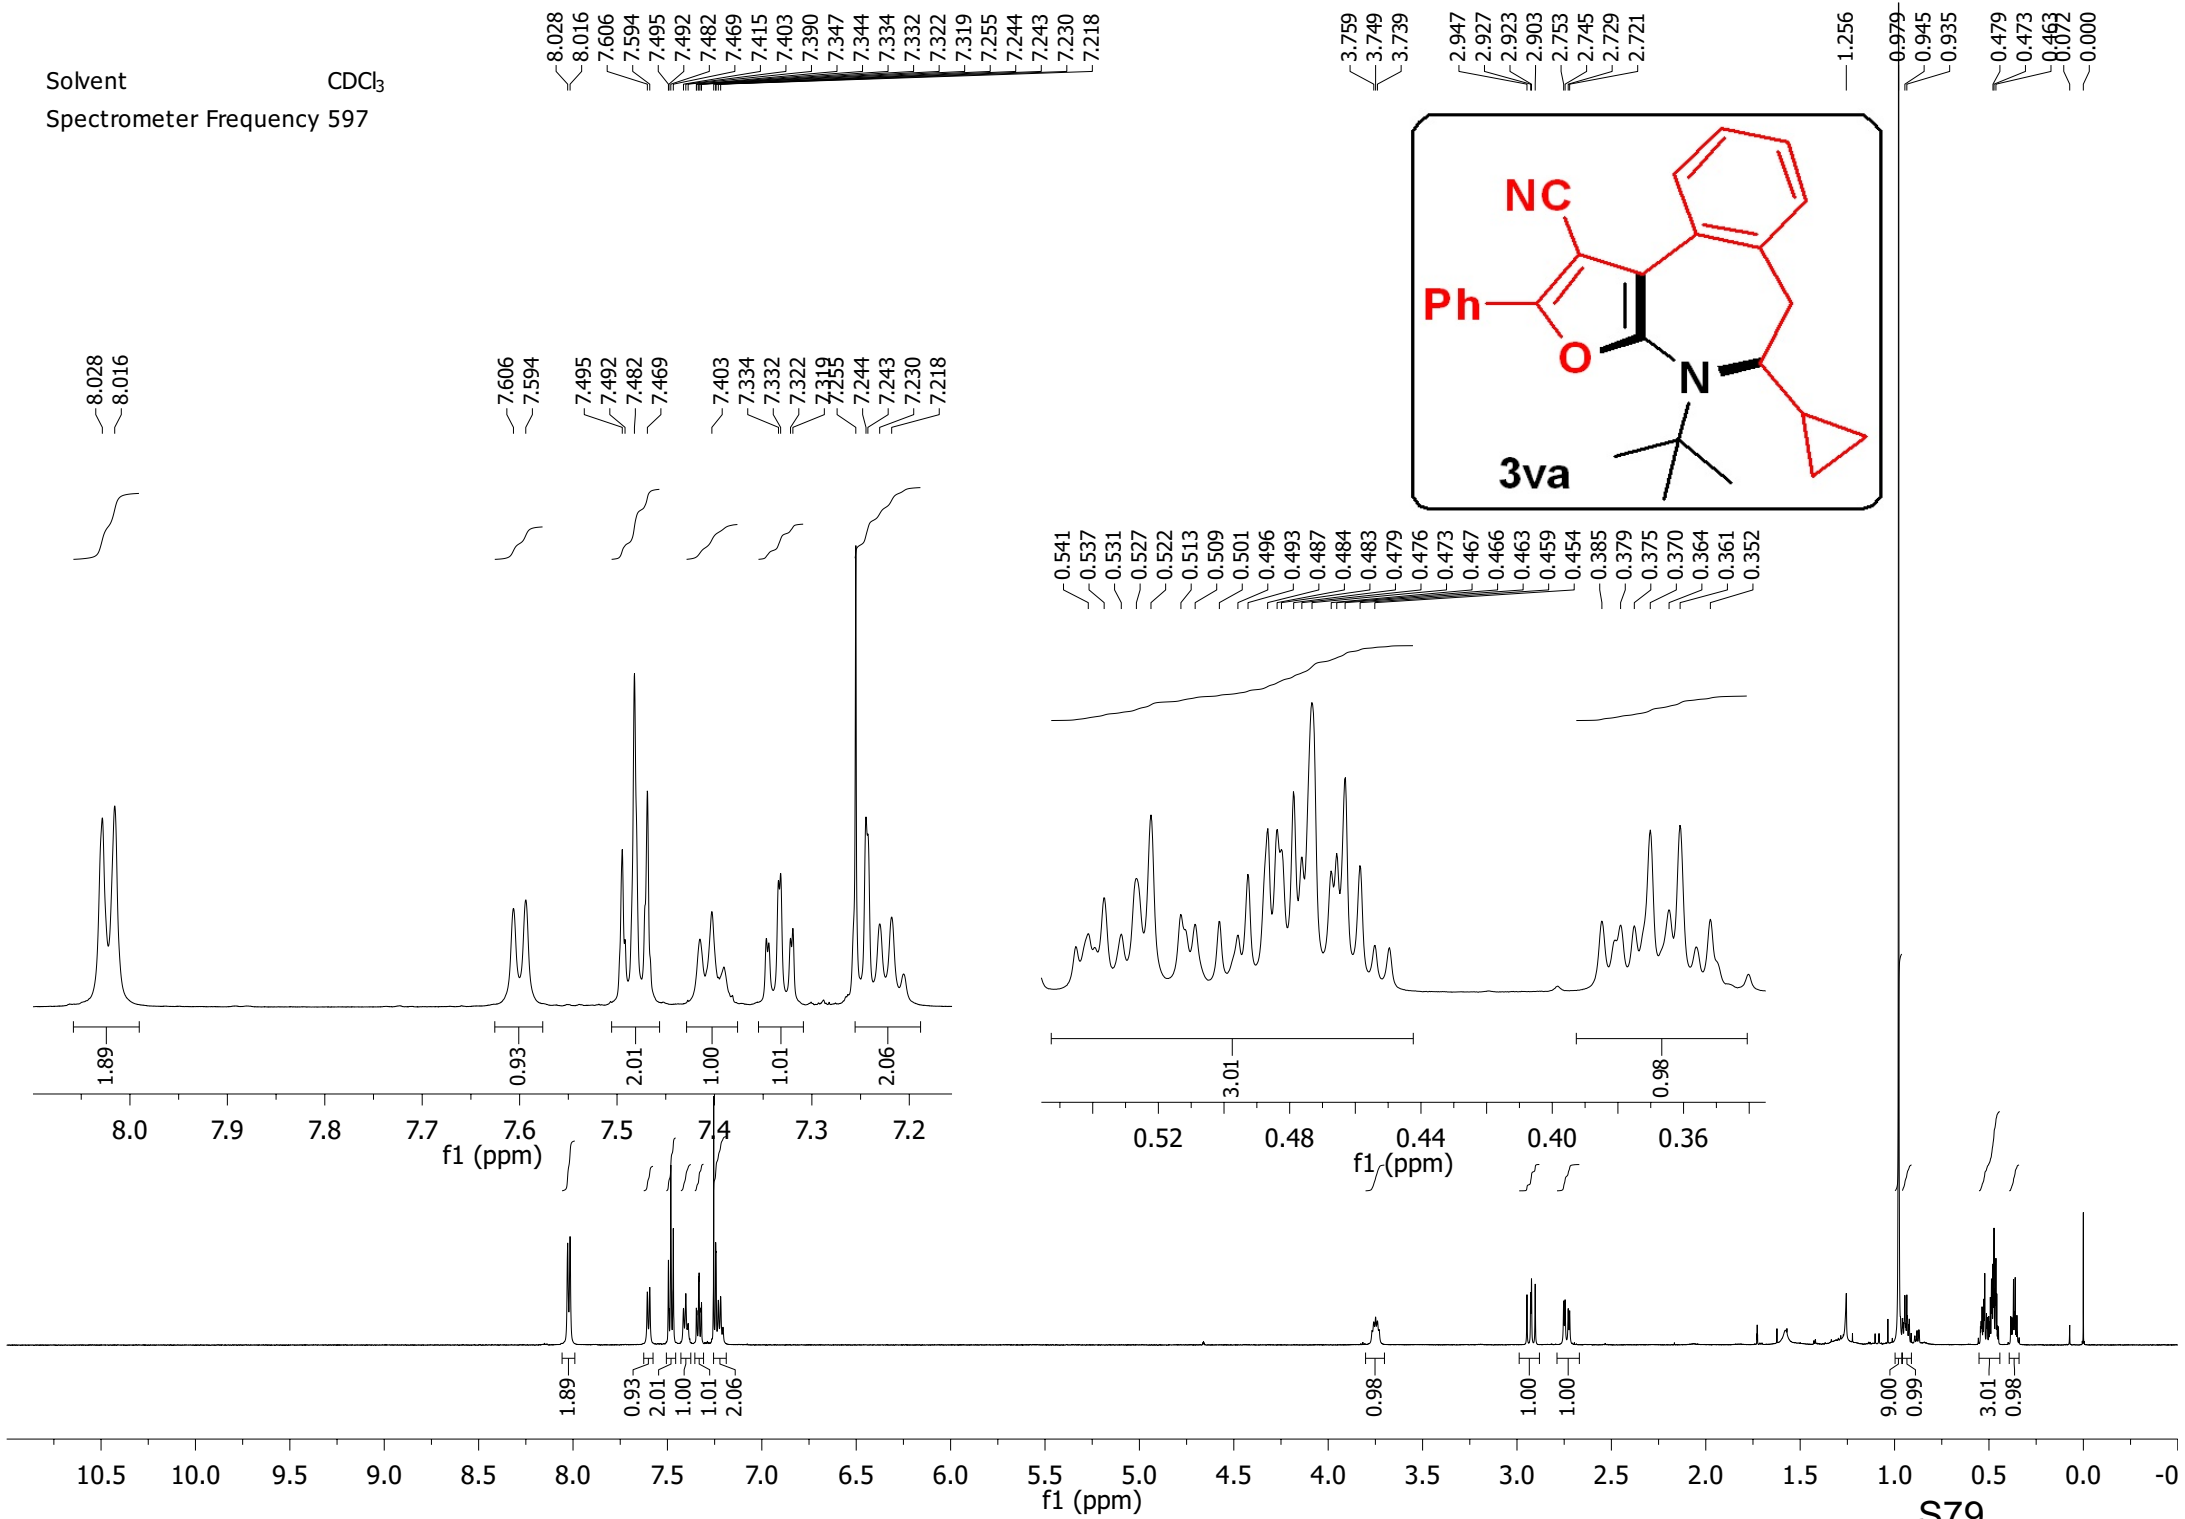

Solvent  $\text{CDCl}_3$   
Spectrometer Frequency 150

154.832  
154.397  
138.513  
129.564  
129.413  
128.971  
127.310  
127.151  
126.173  
125.132  
116.695  
115.269

90.721

77.203  
76.990  
76.777

67.045

58.144

40.717

29.274

18.746

3.265  
3.207

138.513

131.543

129.564  
129.413  
128.971  
128.811

127.310  
127.151

126.173

125.132

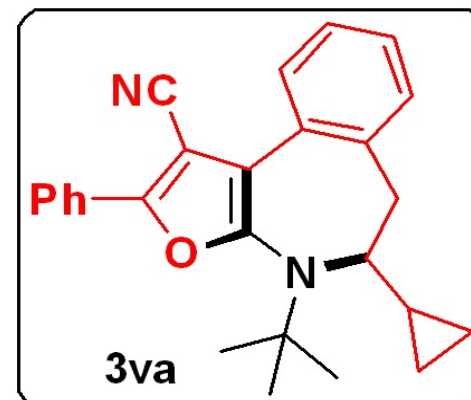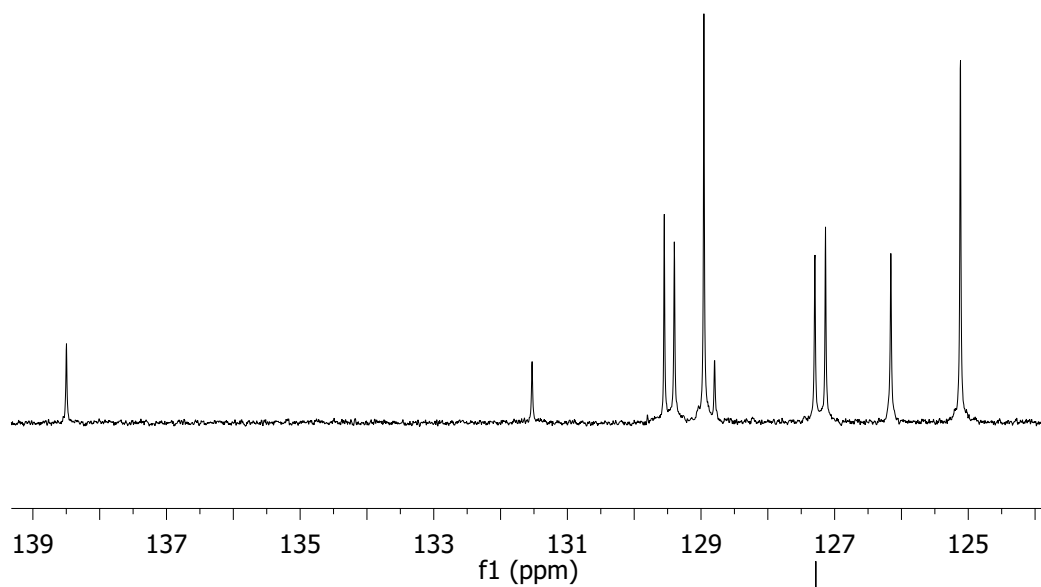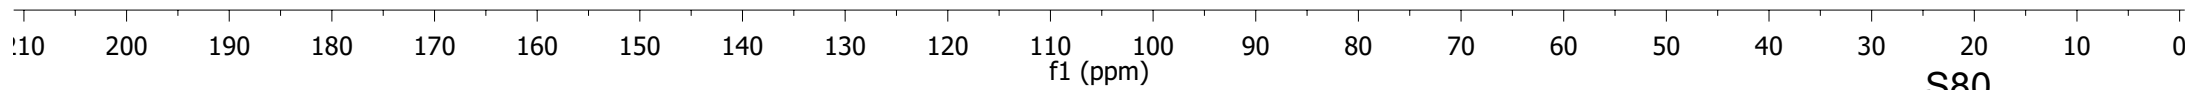

S80

Solvent  $\text{CDCl}_3$   
Spectrometer Frequency 400

7.977 7.973 7.968 7.959 7.955 7.953 7.649 7.630 7.480 7.478 7.474 7.460 7.456 7.444 7.440 7.378 7.375 7.370 7.364 7.356 7.350 7.347 7.344 7.338 7.335 7.328 7.228 7.225 7.210 7.206 7.197 7.191 7.178 7.172 3.803 3.789 3.775 2.904 2.893 2.890 2.887 2.876

7.977 7.973 7.968 7.959 7.955 7.953

7.649 7.630

7.480 7.478 7.474 7.460 7.456 7.444 7.440

7.375 7.370 7.356 7.350 7.328

7.228 7.210 7.206 7.197 7.191 7.178

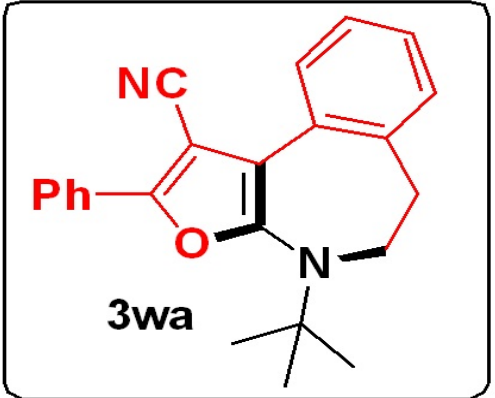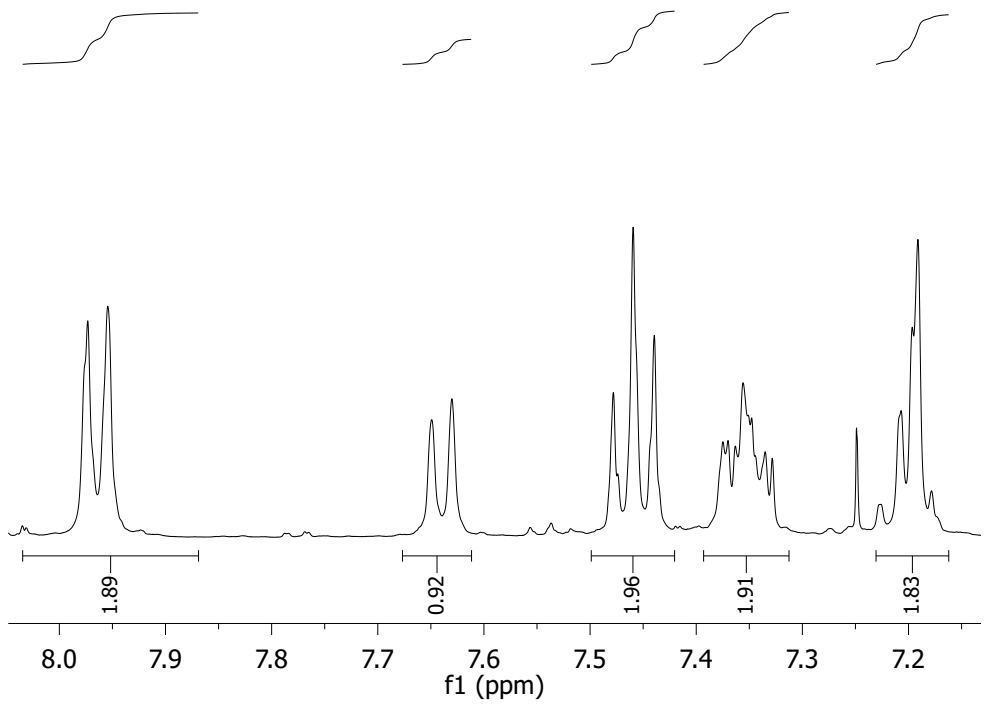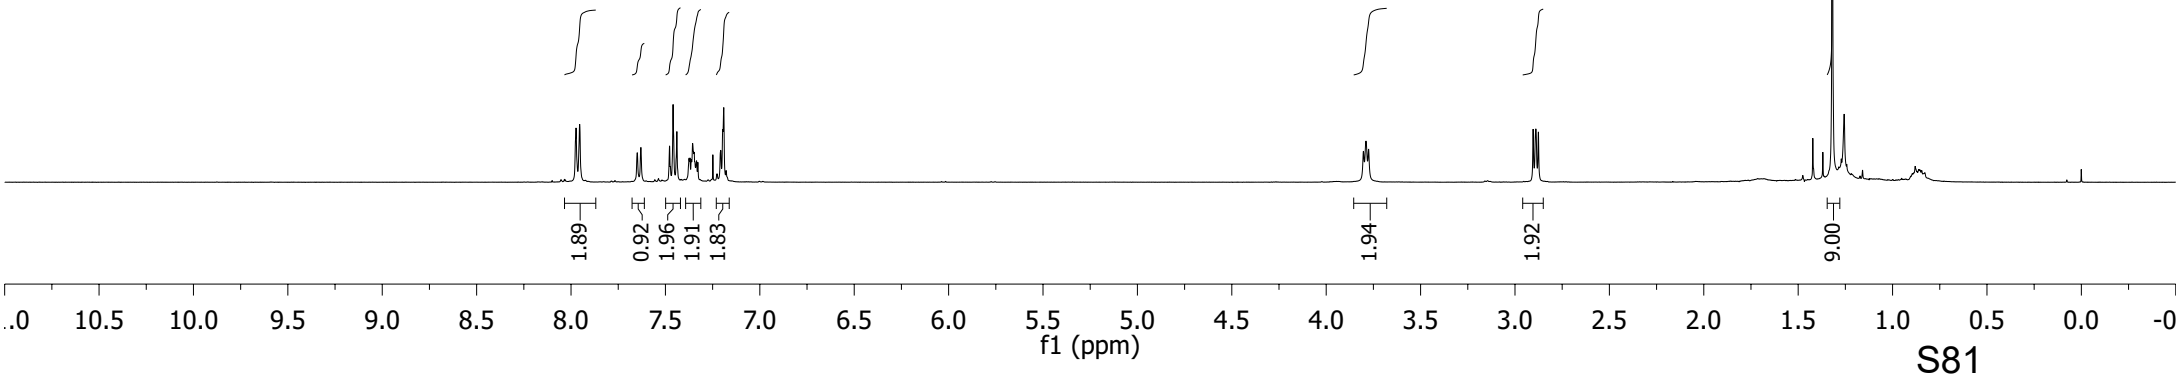

Solvent  $\text{CDCl}_3$   
Spectrometer Frequency 100

154.011  
152.428  
139.897  
131.262  
128.981  
128.796  
128.645  
127.166  
126.837  
126.411  
124.410  
115.571  
107.731

91.842  
77.307  
76.990  
76.673  
57.317  
55.005  
33.732  
29.669  
28.533

131.262  
128.981  
128.796  
128.645  
127.166  
126.837  
126.411  
124.410

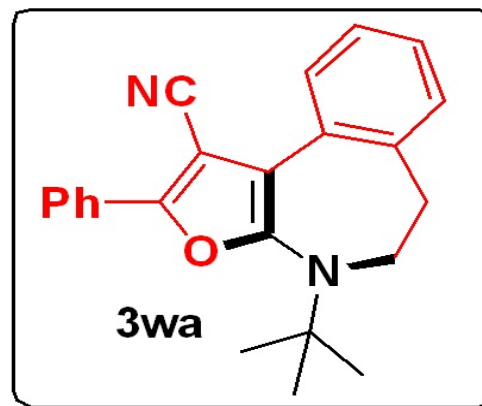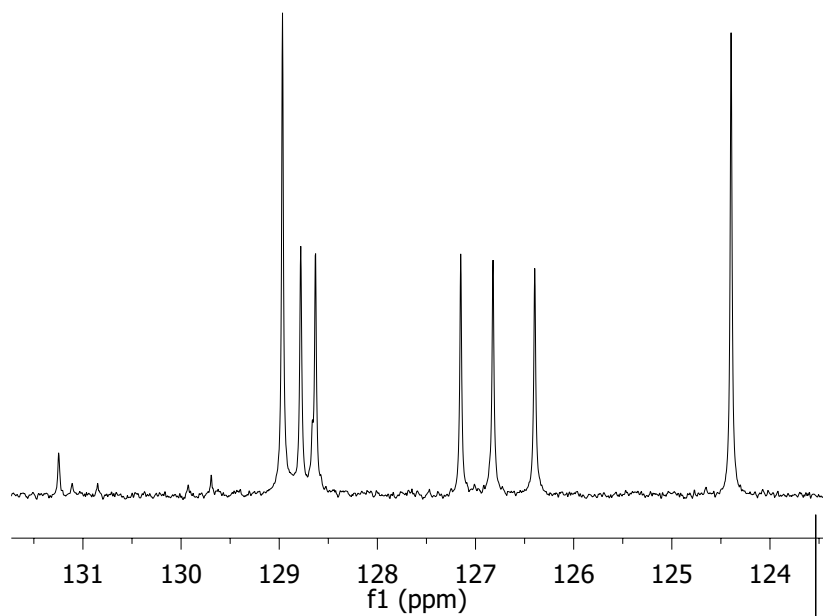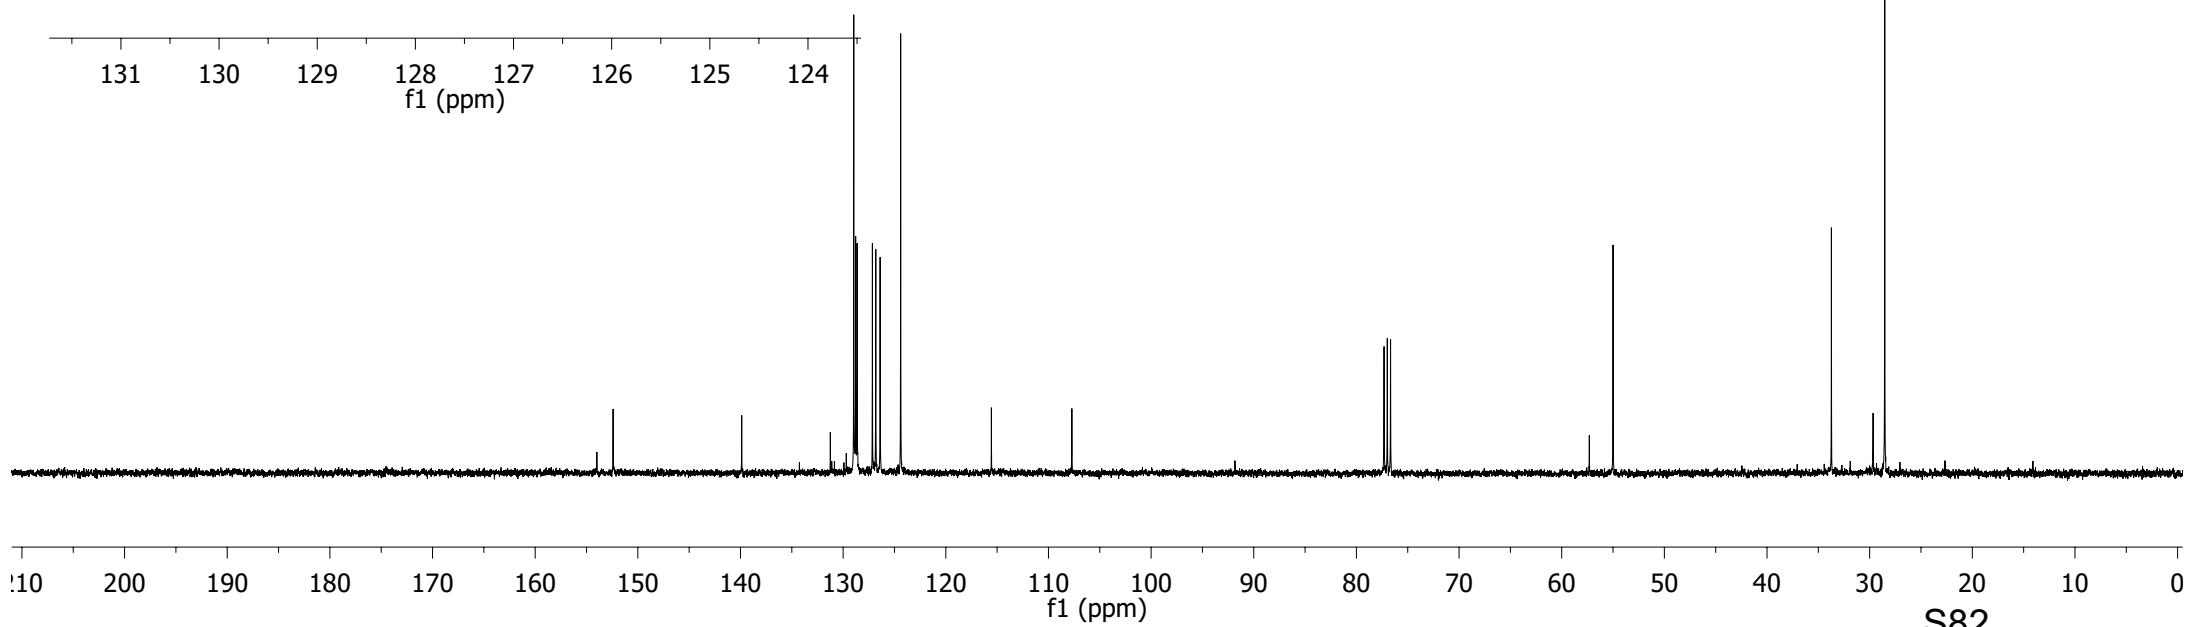

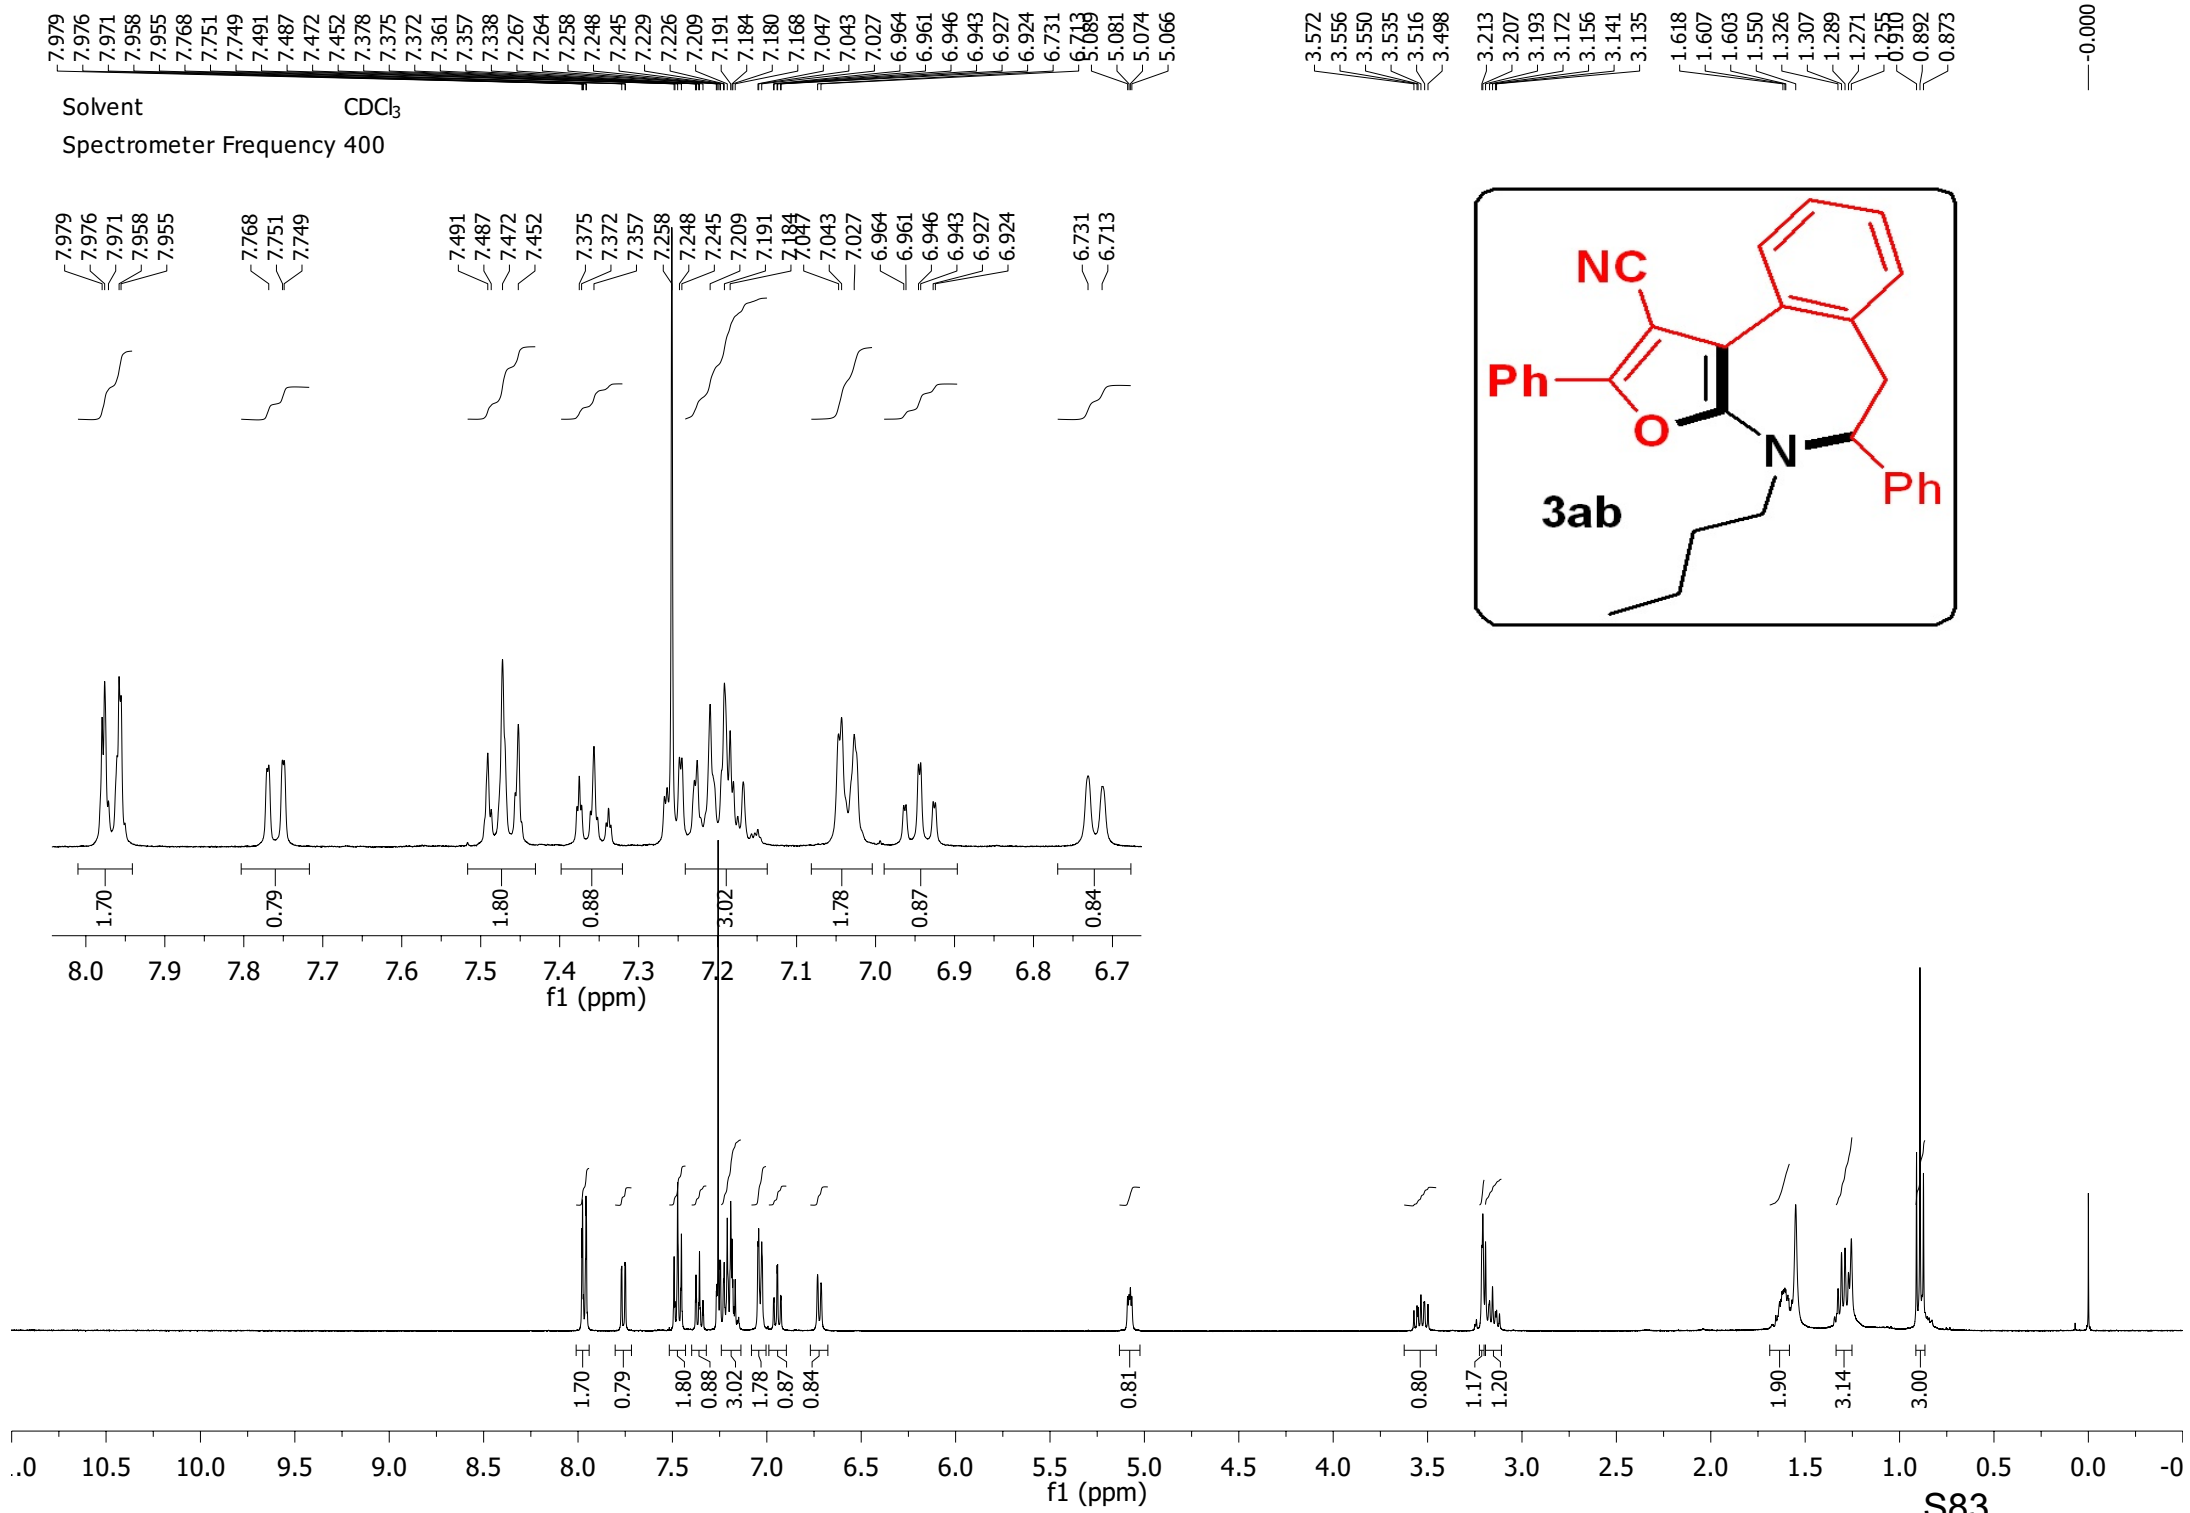

Solvent  $\text{CDCl}_3$   
Spectrometer Frequency 100

—153.683  
—150.839  
—141.875  
—128.995  
—128.527  
—128.292  
—127.276  
—127.093  
—126.349  
—125.511  
—125.400  
—124.143  
—116.118

—92.529

—77.311  
—76.993  
—76.676

—68.543

—49.887

—41.970

—29.847

—20.119

—13.858

—131.201

—130.168

—128.995

—128.629

—128.527

—128.292

—127.276

—127.093

—126.349

—125.511

—125.400

—124.143

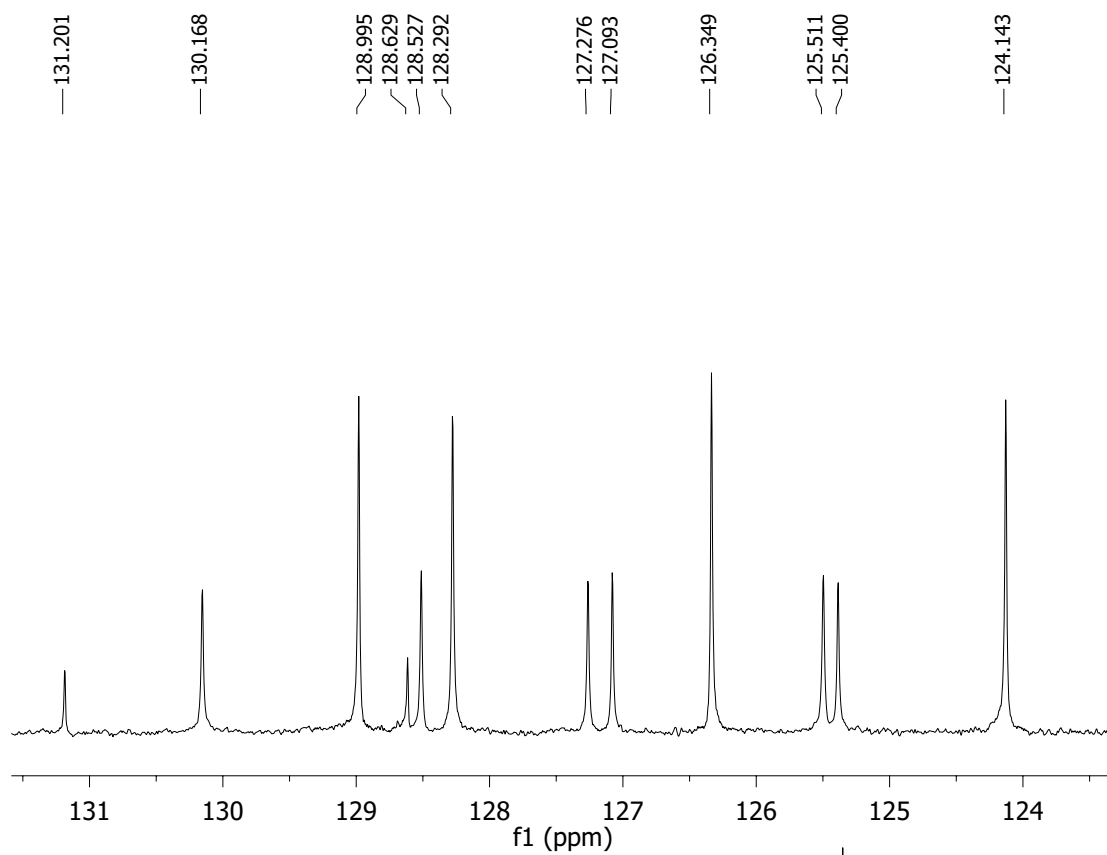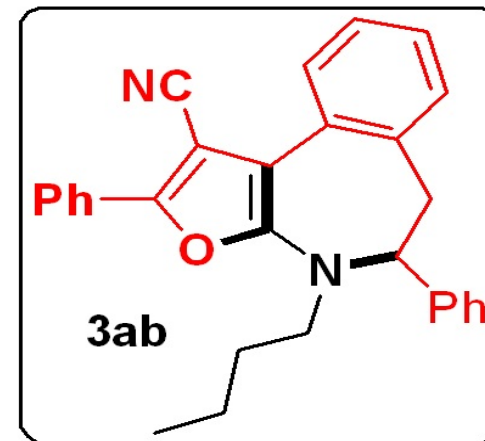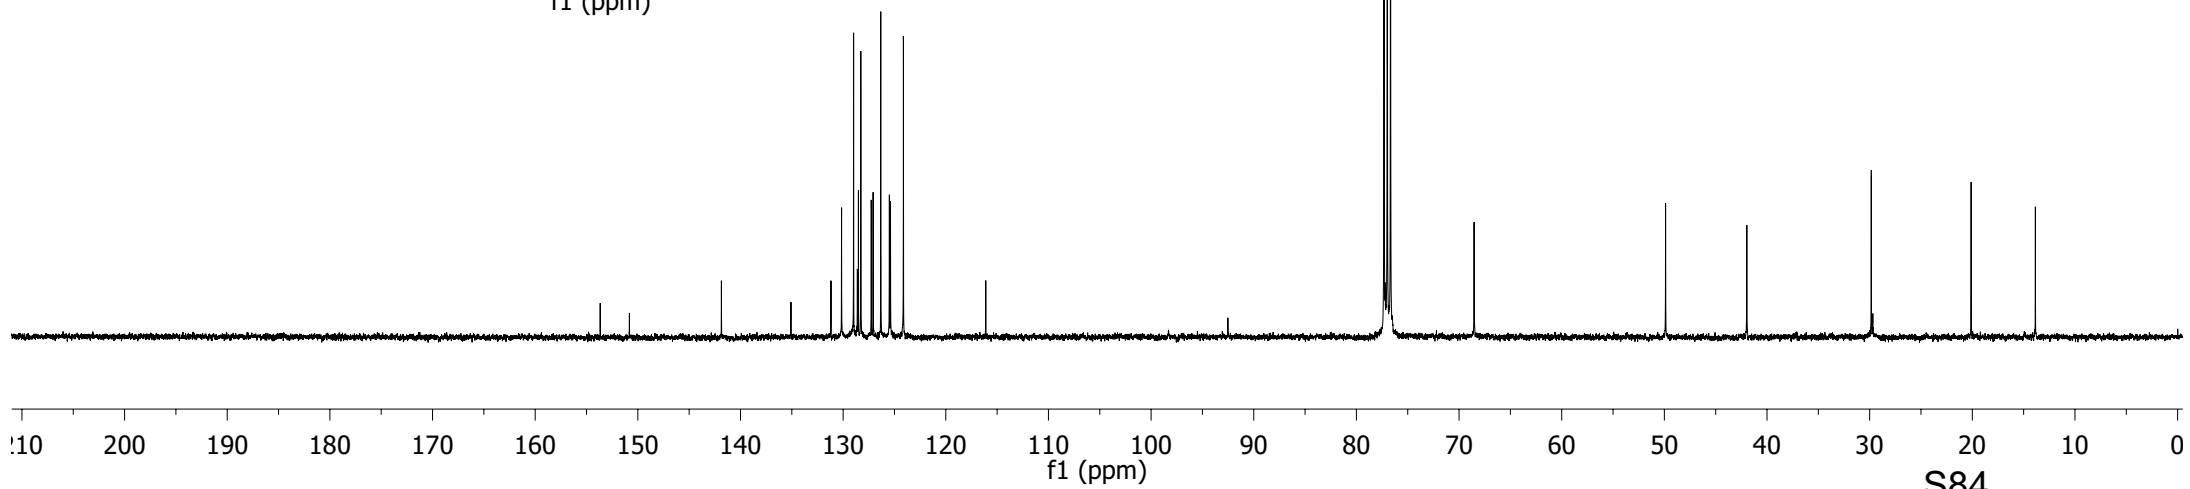

S84



Solvent  $\text{CDCl}_3$   
 Spectrometer Frequency 400

7.998, 7.995, 7.976, 7.974, 7.740, 7.722, 7.508, 7.504, 7.489, 7.469, 7.387, 7.369, 7.350, 7.258, 7.236, 7.233, 7.216, 7.214, 7.196, 7.191, 7.175, 7.157, 7.149, 7.144, 7.141, 7.134, 7.127, 7.118, 7.109, 7.064, 7.047, 6.954, 6.938, 6.935, 6.919, 6.715, 6.696, 5.165, 5.151

7.998, 7.995, 7.976, 7.974, 7.740, 7.722, 7.508, 7.504, 7.489, 7.469, 7.387, 7.369, 7.350, 7.258, 7.236, 7.233, 7.175, 7.157, 7.144, 7.127, 7.064, 7.047, 6.954, 6.938, 6.935, 6.919, 6.715, 6.696

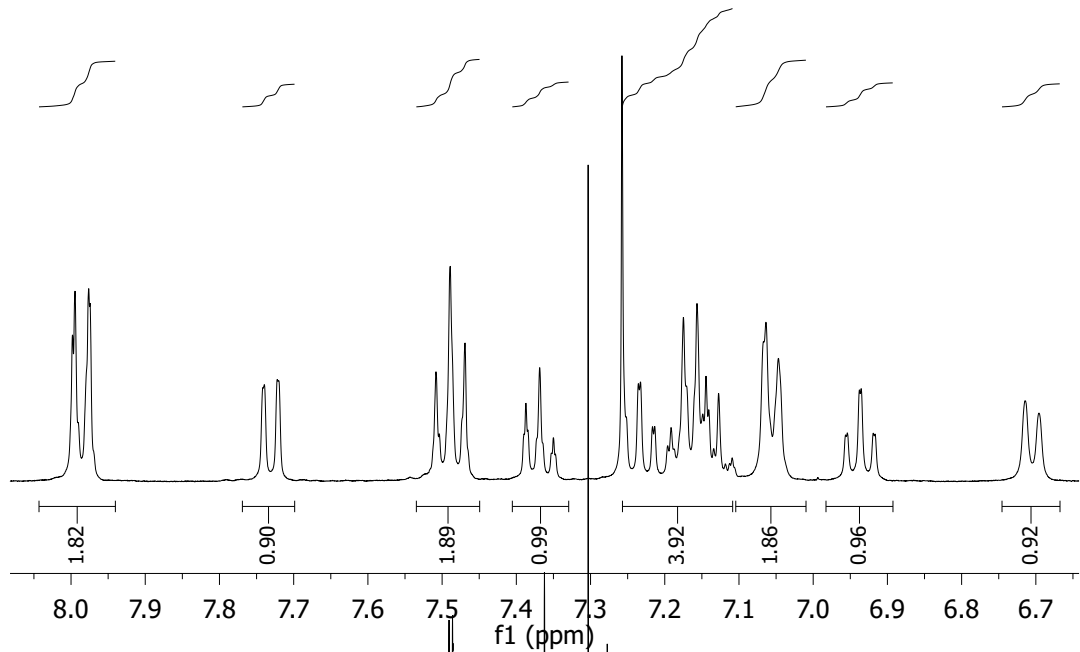

3.464, 3.203, 3.185, 3.168, 3.149, 3.086, 3.082, 3.050, 3.046, 1.839, 1.829, 1.803, 1.777, 1.742, 1.717, 1.628, 1.597, 1.546, 1.421, 1.398, 1.389, 1.286, 1.255, 1.217, 1.193, 1.186, 0.867

3.464, 3.203, 3.185, 3.168, 3.149, 3.086, 3.082, 3.050, 3.046, 1.839, 1.829, 1.803, 1.777, 1.742, 1.717, 1.628, 1.597, 1.546, 1.421, 1.398, 1.389, 1.286, 1.255, 1.217, 1.193, 1.186, 0.867

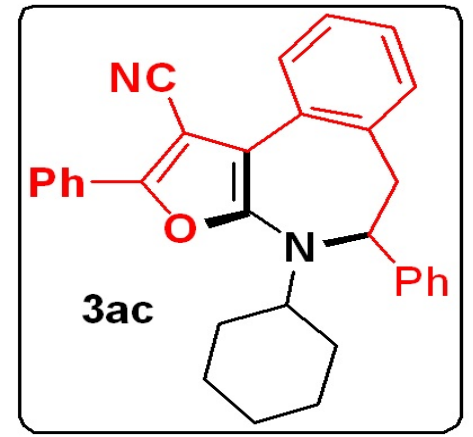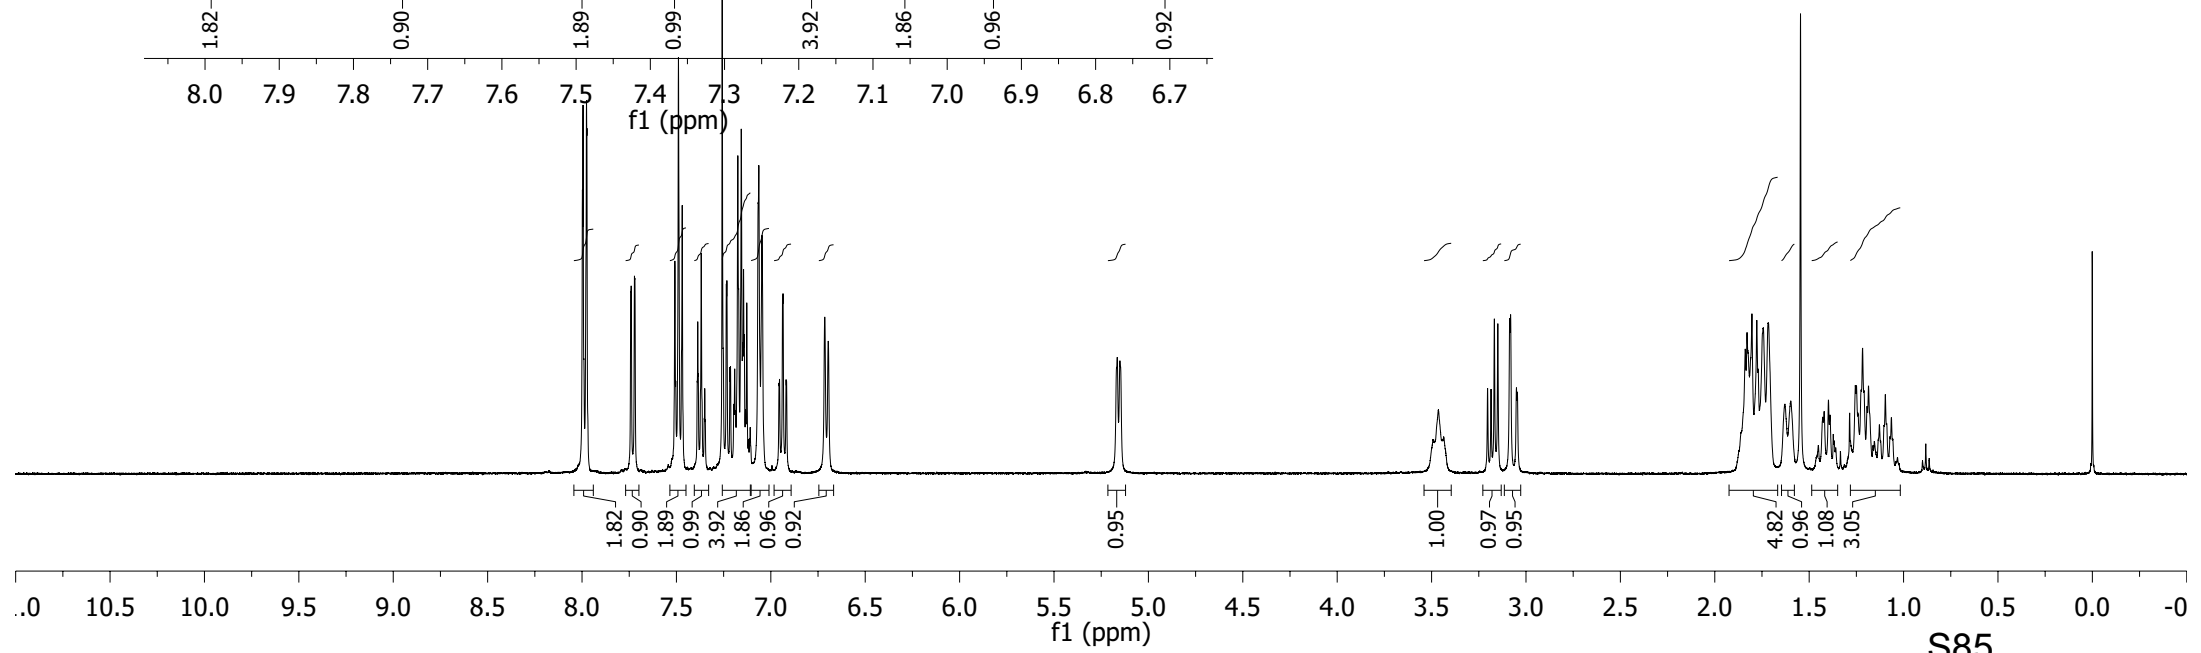

Solvent  $\text{CDCl}_3$   
Spectrometer Frequency 100

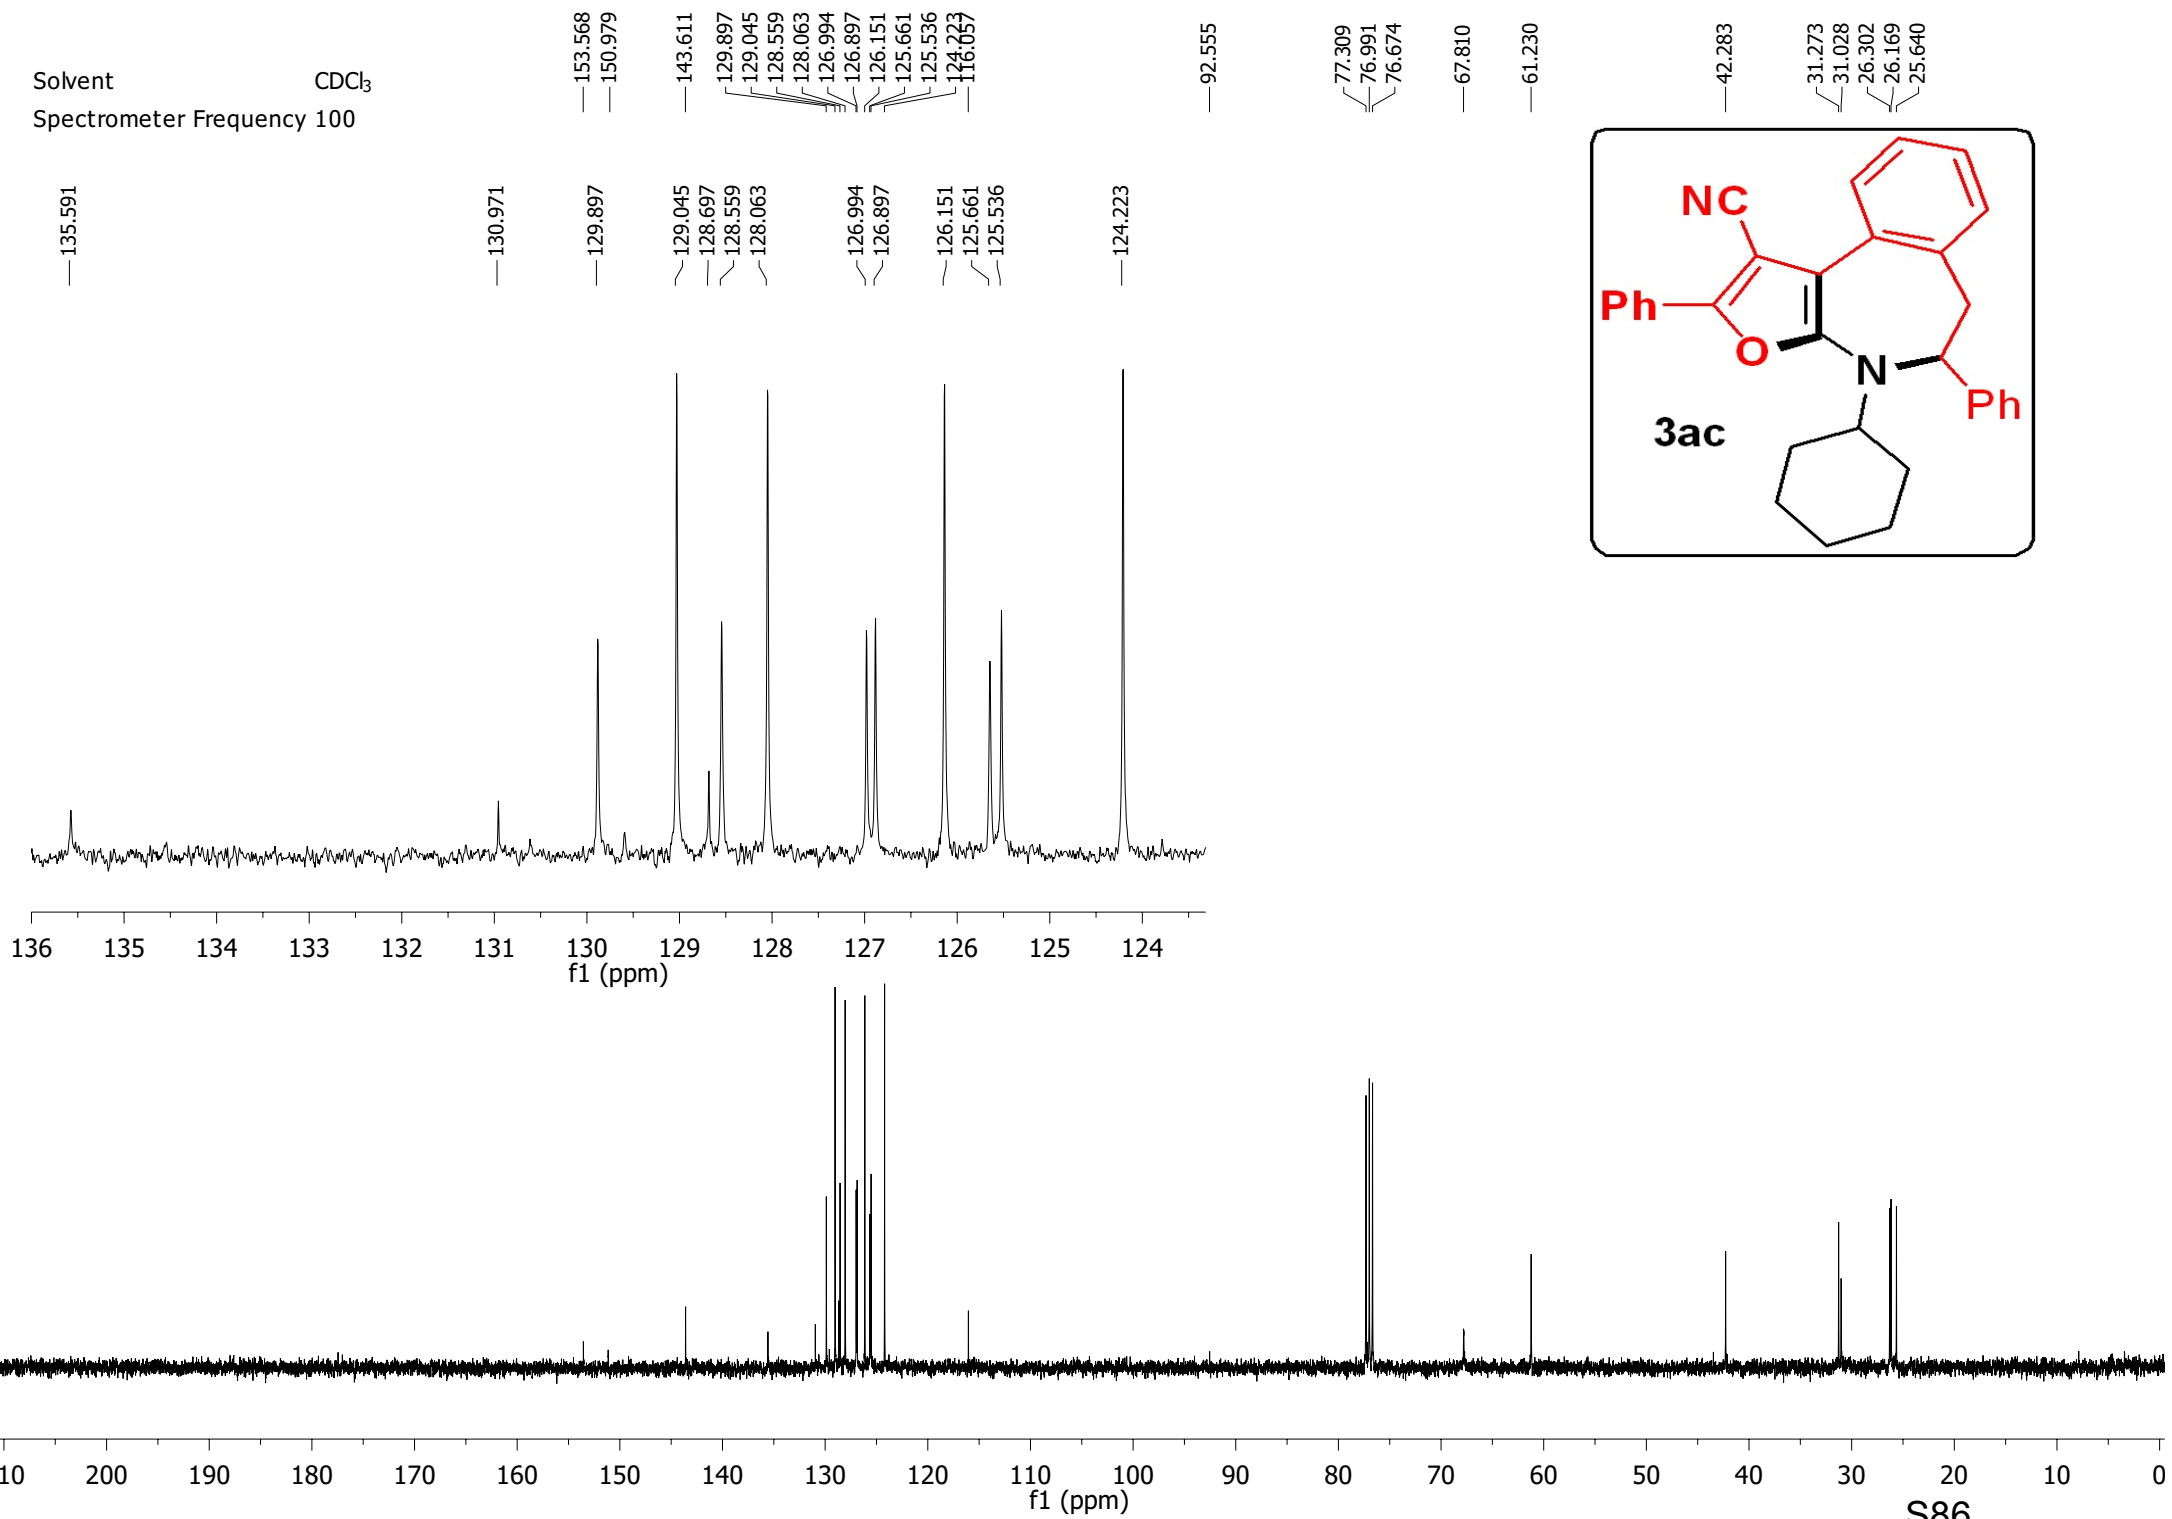

Solvent  $\text{CDCl}_3$   
Spectrometer Frequency 400

8.115  
8.112  
8.093  
7.645  
7.626  
7.551  
7.533  
7.512  
7.493  
7.461  
7.443  
7.401  
7.382  
7.363  
7.344  
7.329  
7.314  
7.312  
7.294  
7.254  
7.245  
5.110  
5.089  
5.079

2.996  
2.961  
2.929  
2.801  
2.791  
2.765  
2.755

1.893  
1.555  
1.519  
1.474  
1.433  
1.401

0.000

8.115  
8.112  
8.093

7.645  
7.626  
7.551  
7.533  
7.512  
7.493  
7.461  
7.443  
7.401  
7.382  
7.363  
7.344  
7.329  
7.314  
7.312  
7.294  
7.254  
7.245  
7.264  
7.254  
7.245

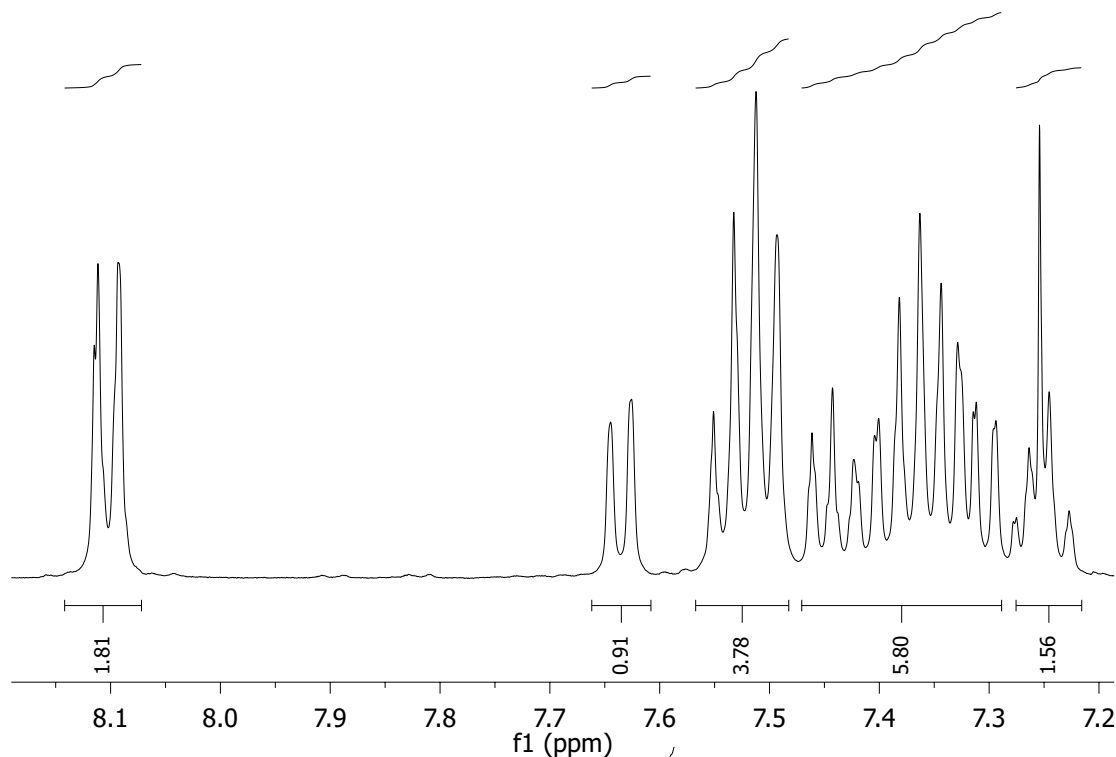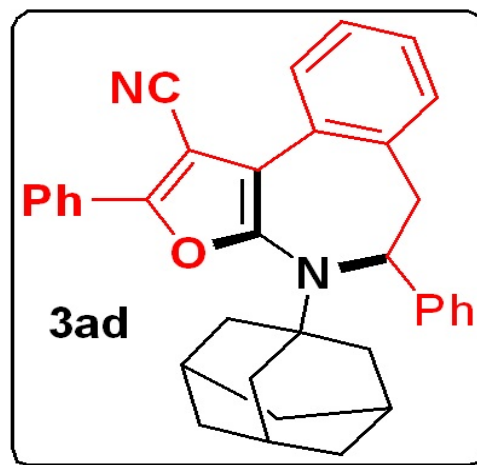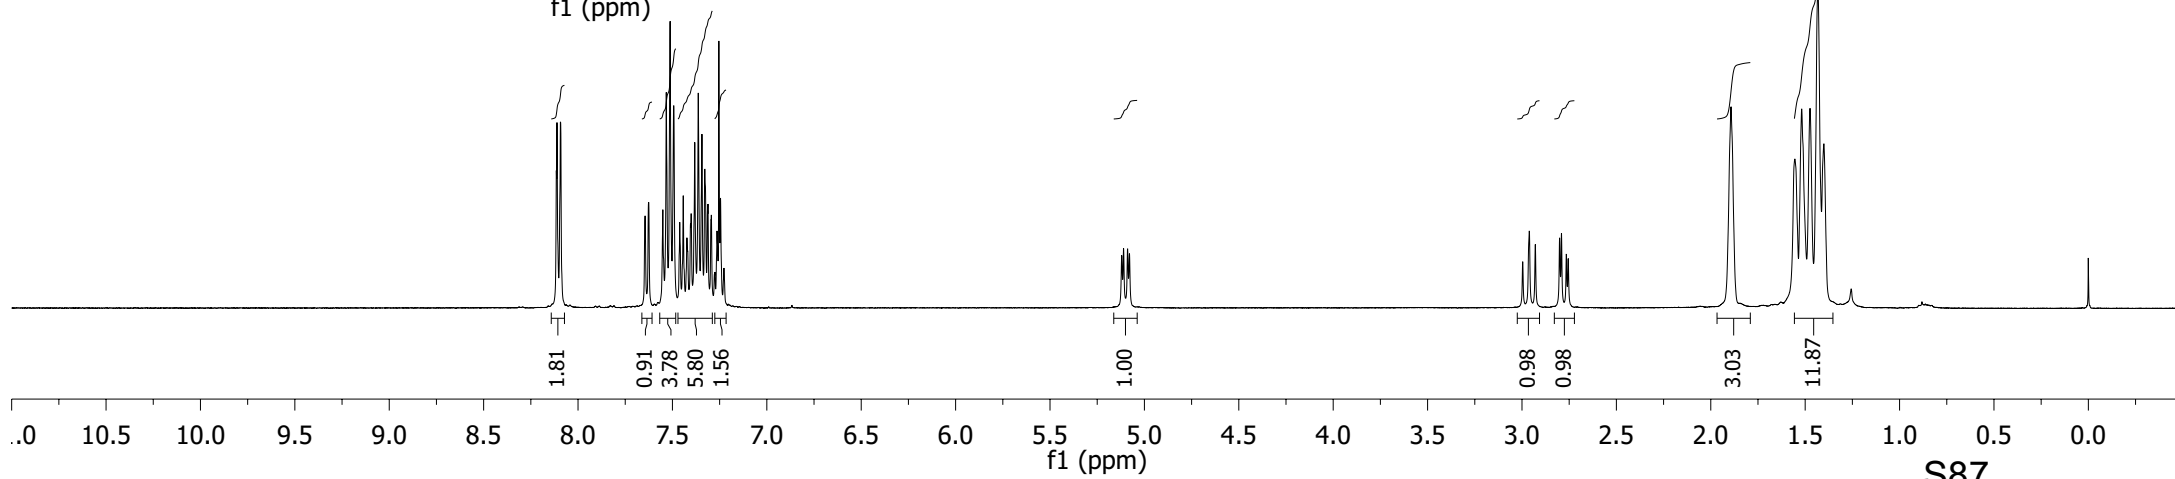

S87

Solvent CDCl<sub>3</sub>  
Spectrometer Frequency 100

154.833  
153.988  
147.396  
138.505  
129.512  
129.057  
128.423  
127.714  
126.405  
125.859  
125.423  
117.494  
115.091  
90.955  
77.308  
76.991  
76.673  
68.951  
59.467  
44.266  
41.460  
36.066  
29.666

131.194  
129.512  
129.288  
129.057  
128.874  
128.423  
127.714  
127.616  
126.695  
126.405  
125.859  
125.175

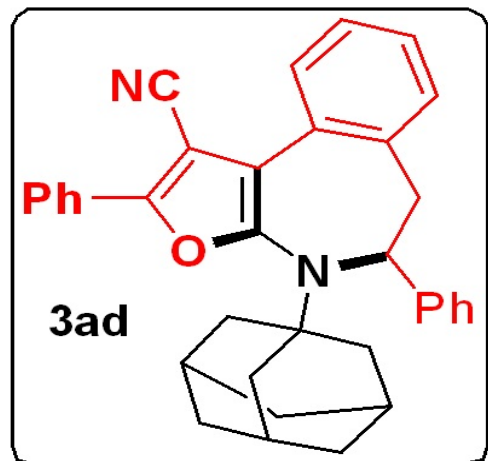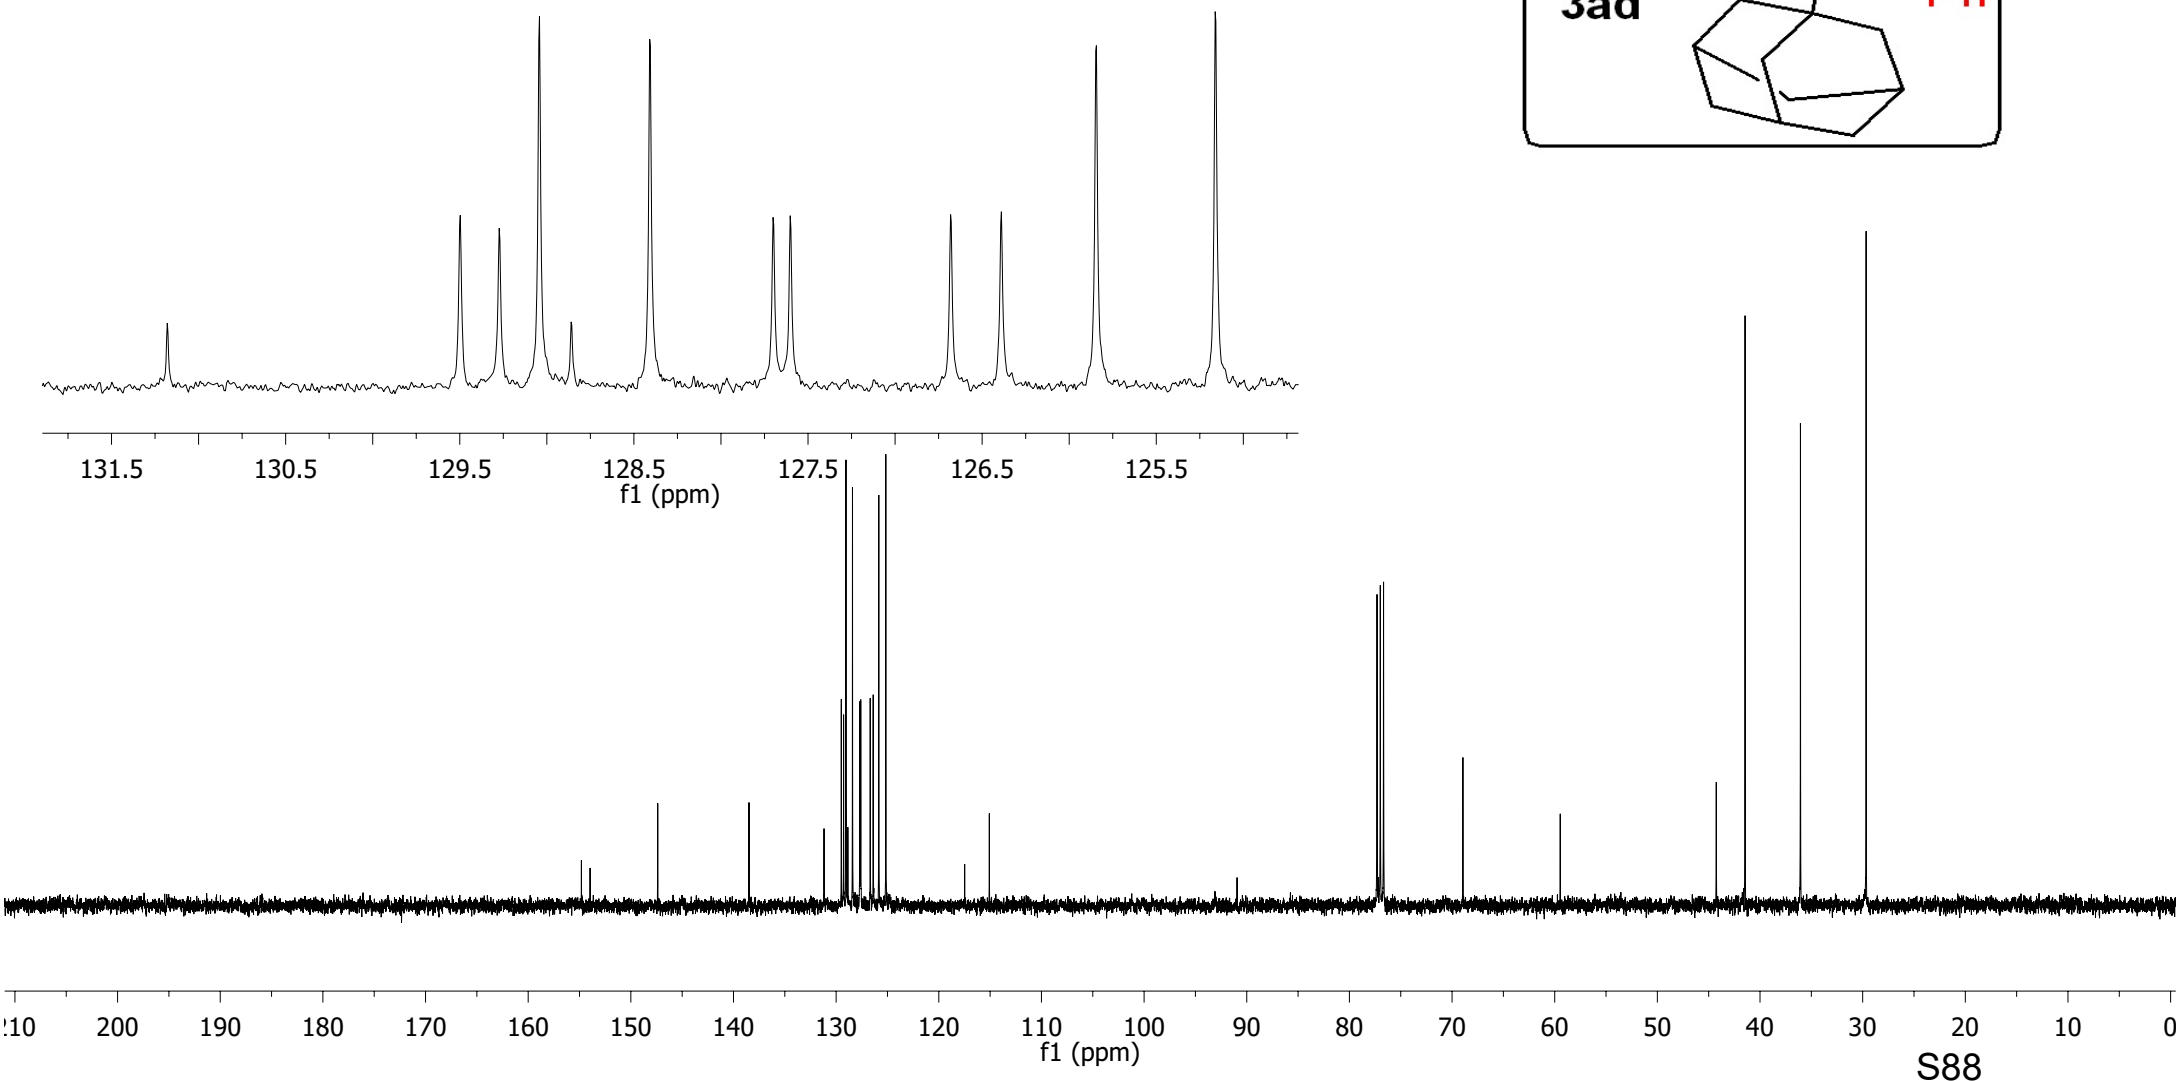

Solvent  $\text{CDCl}_3$   
Spectrometer Frequency 597

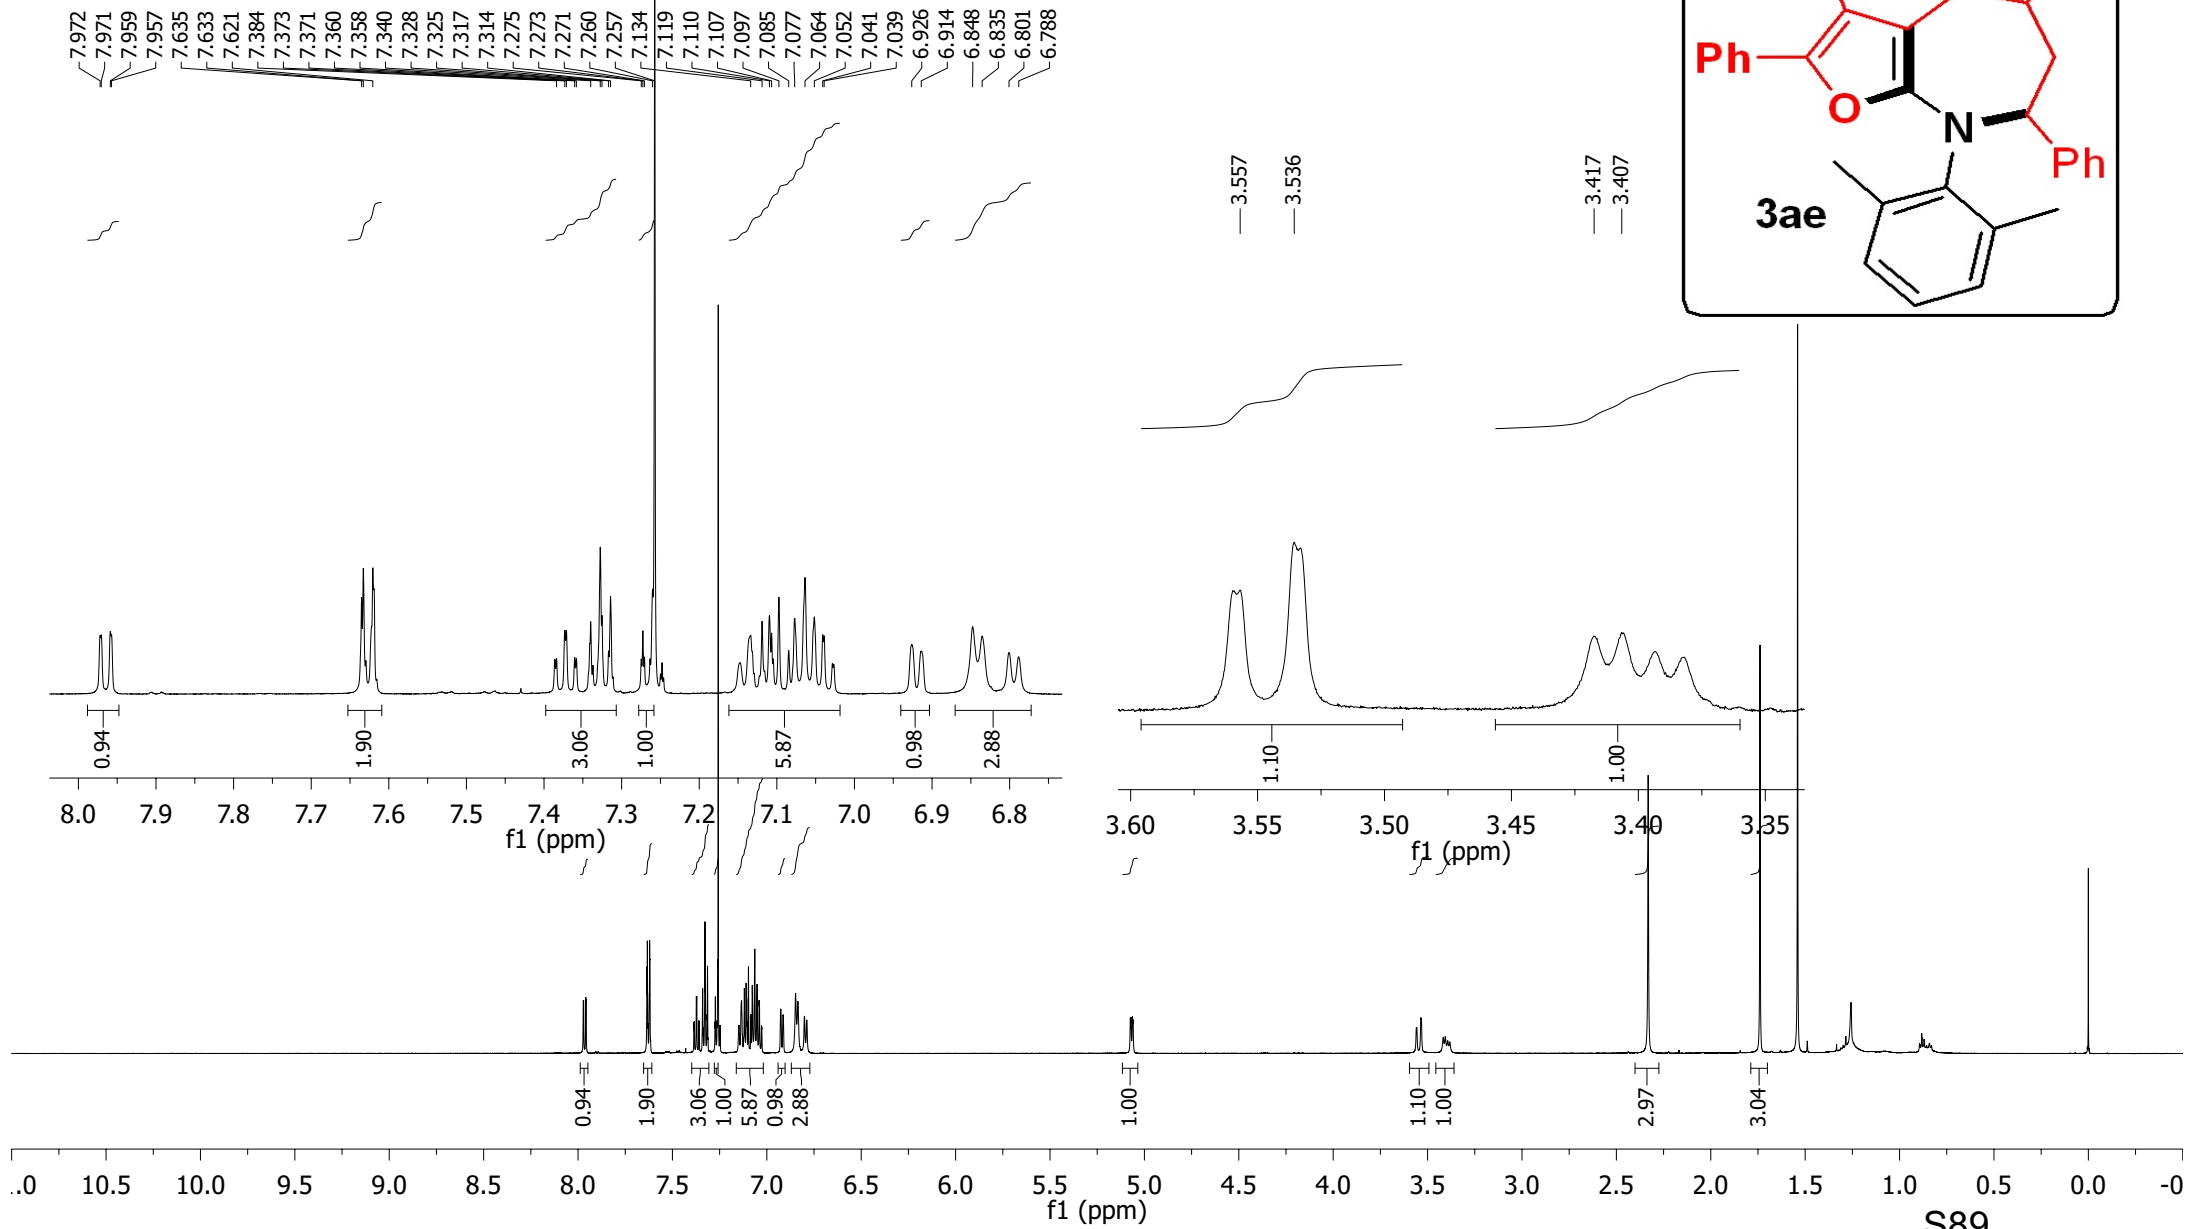

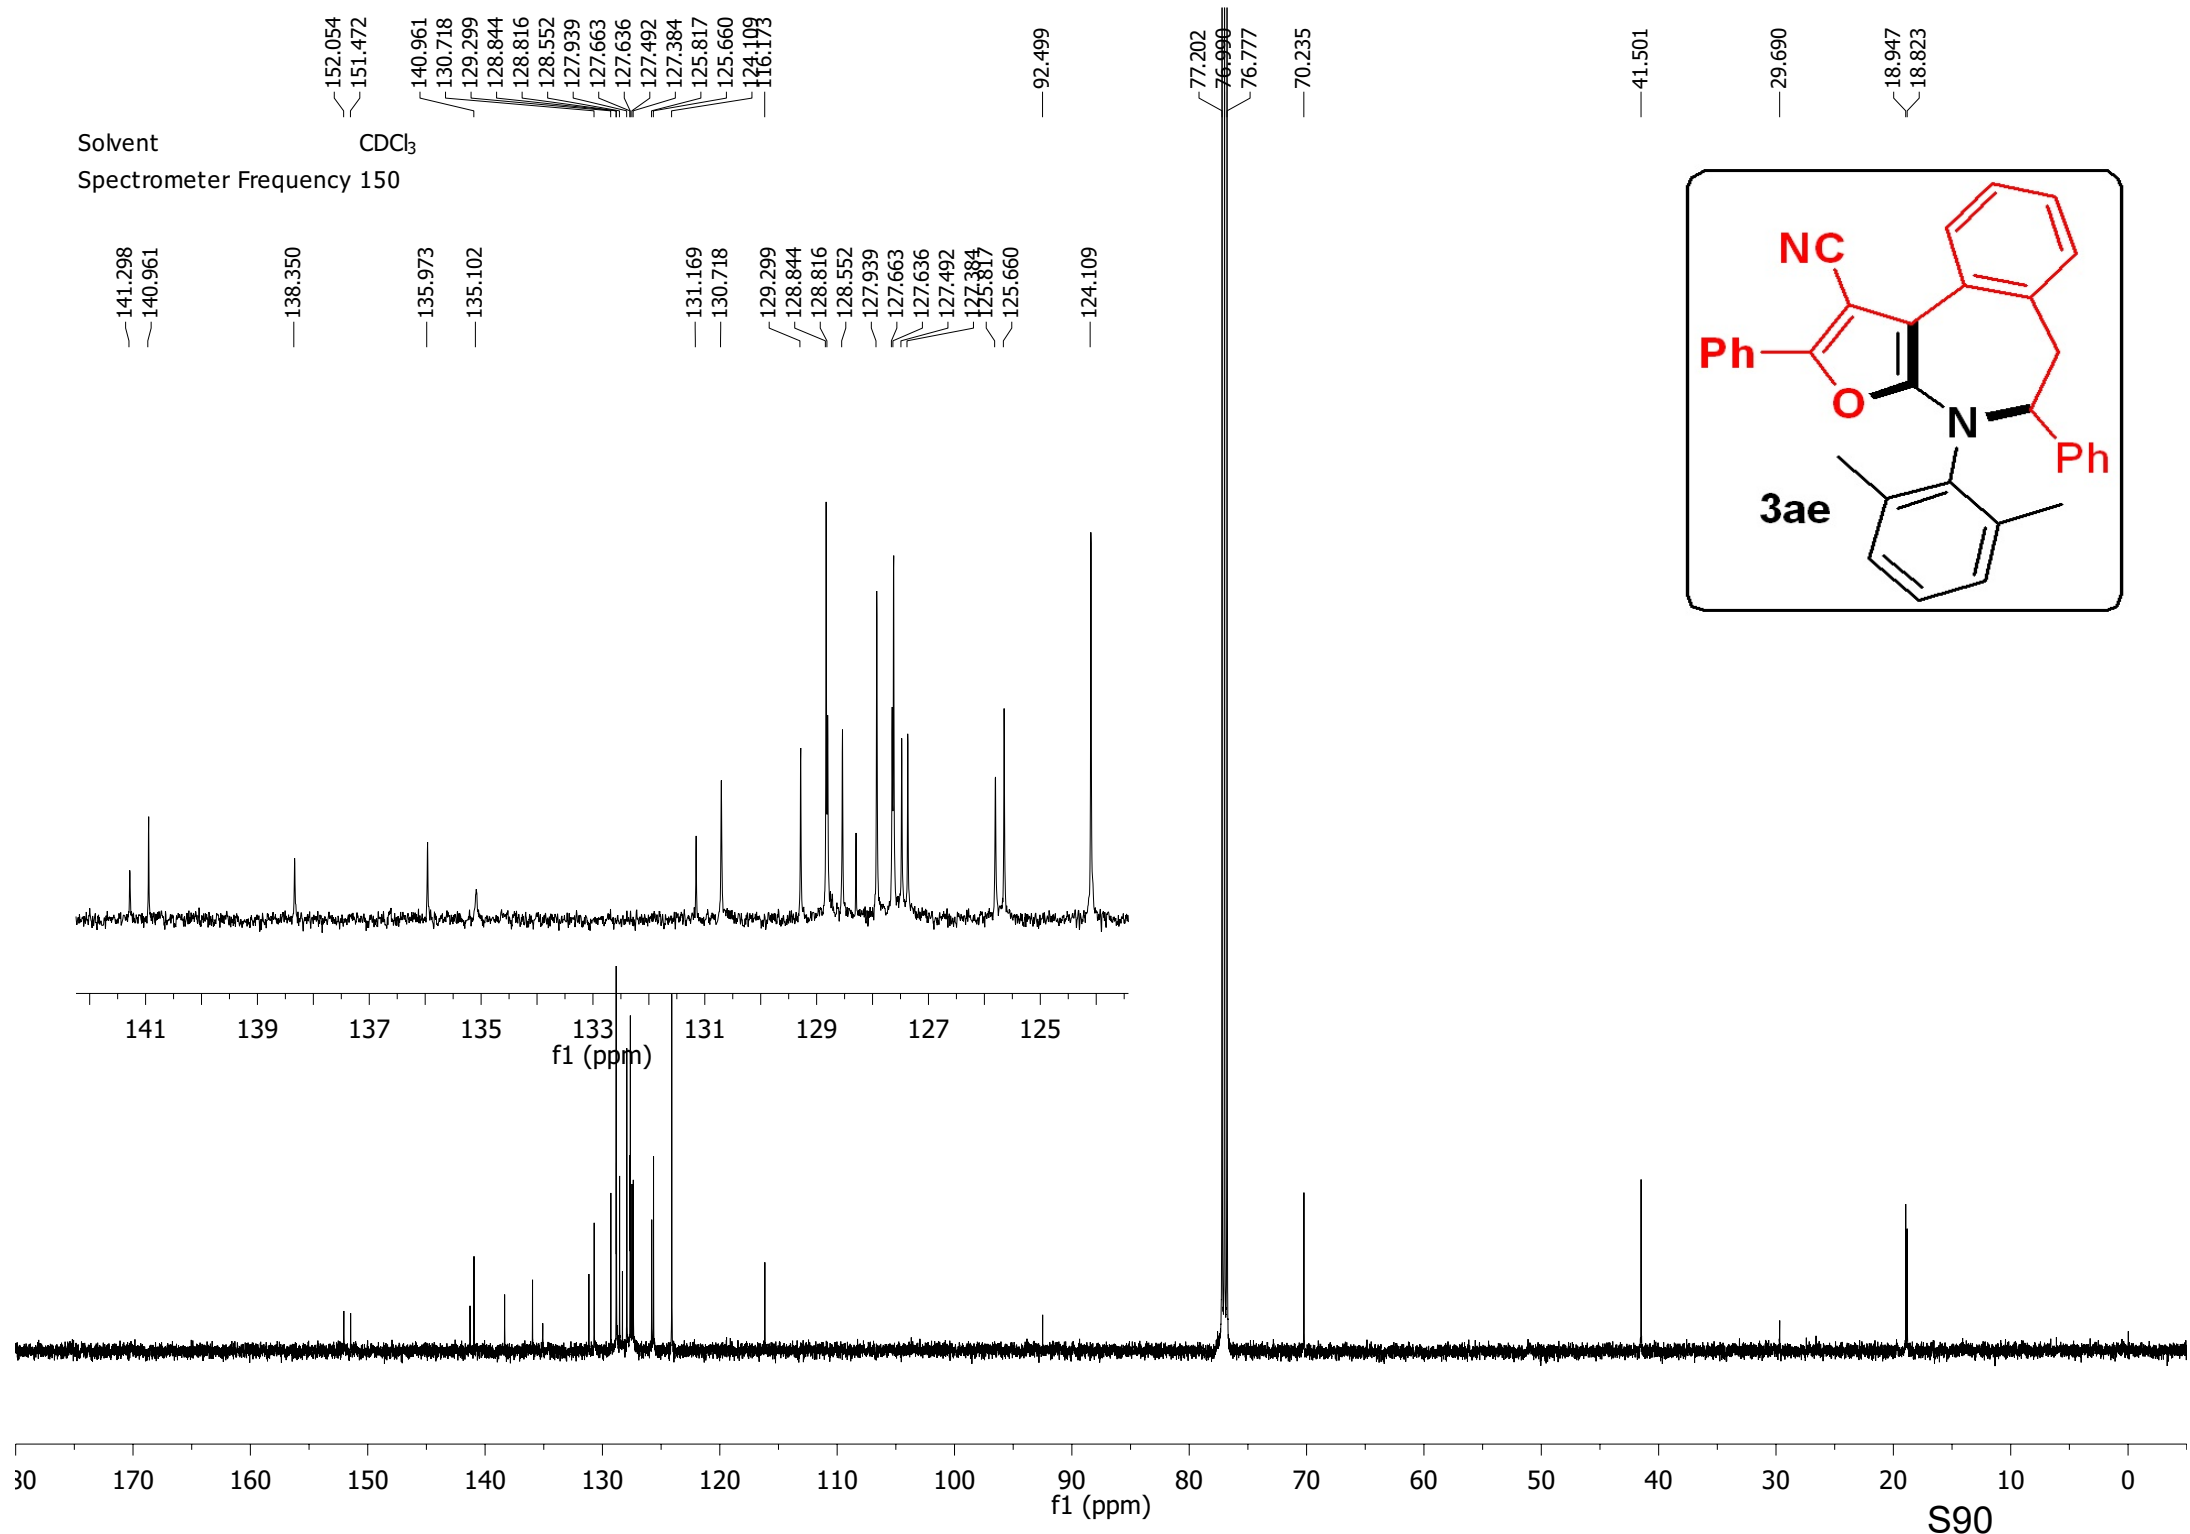

Solvent  $\text{CDCl}_3$   
 Spectrometer Frequency 400

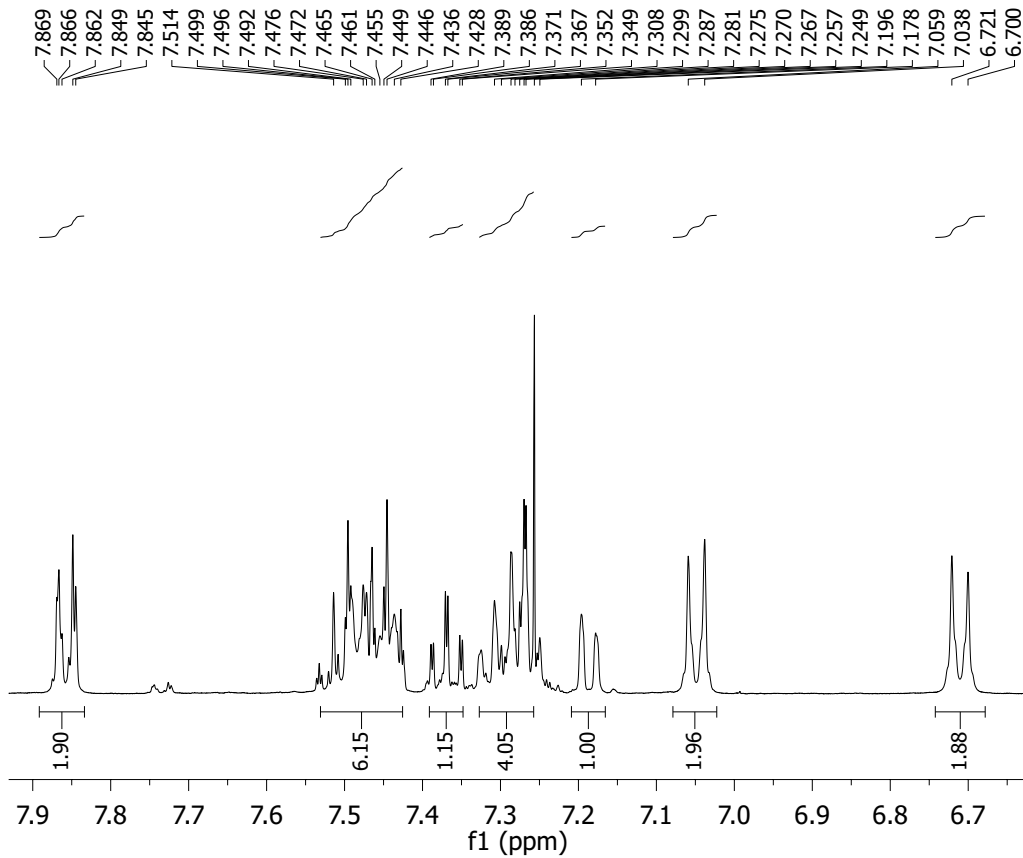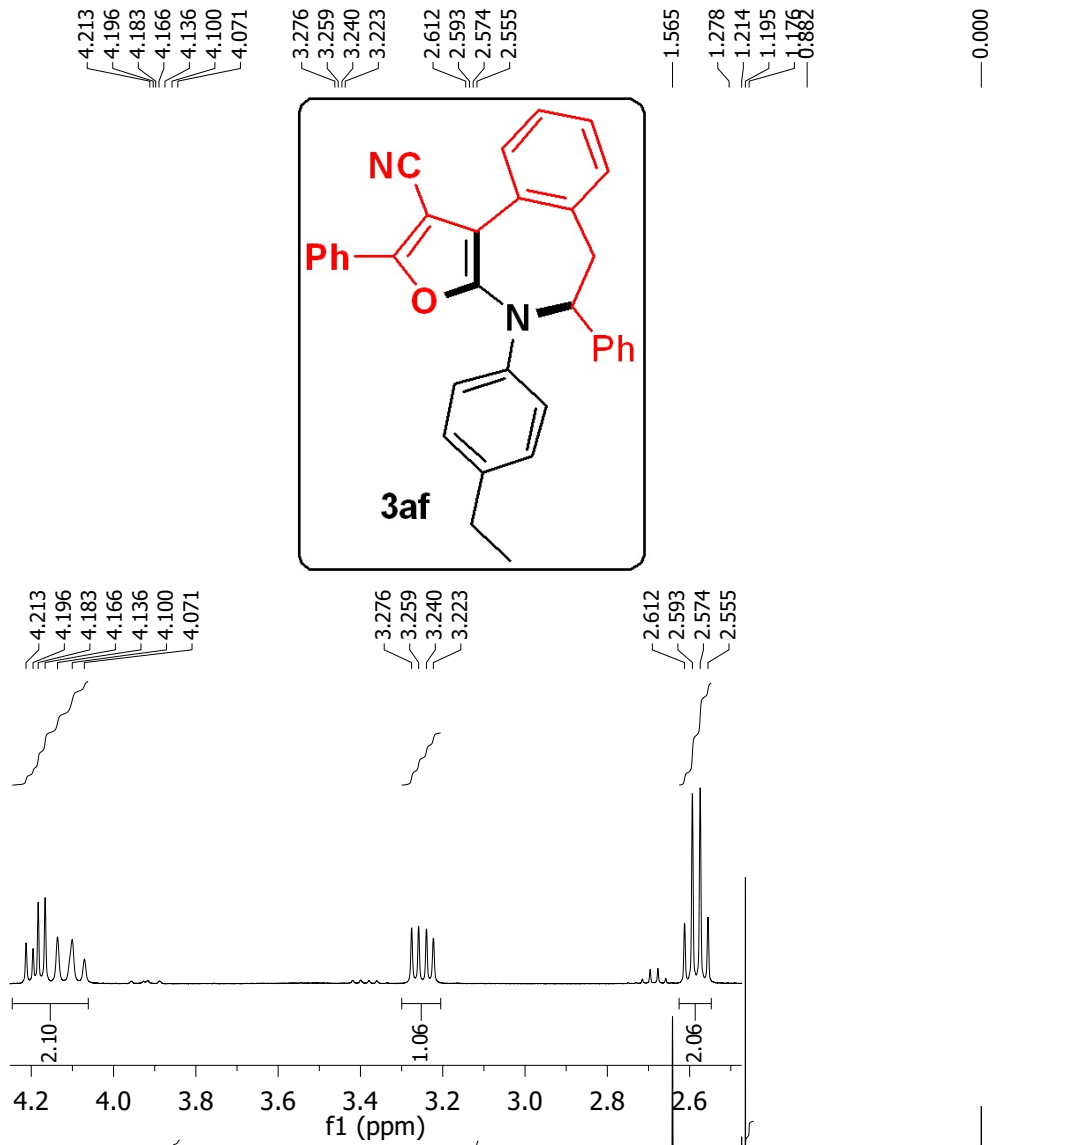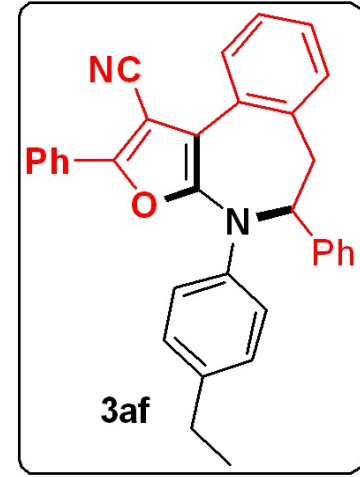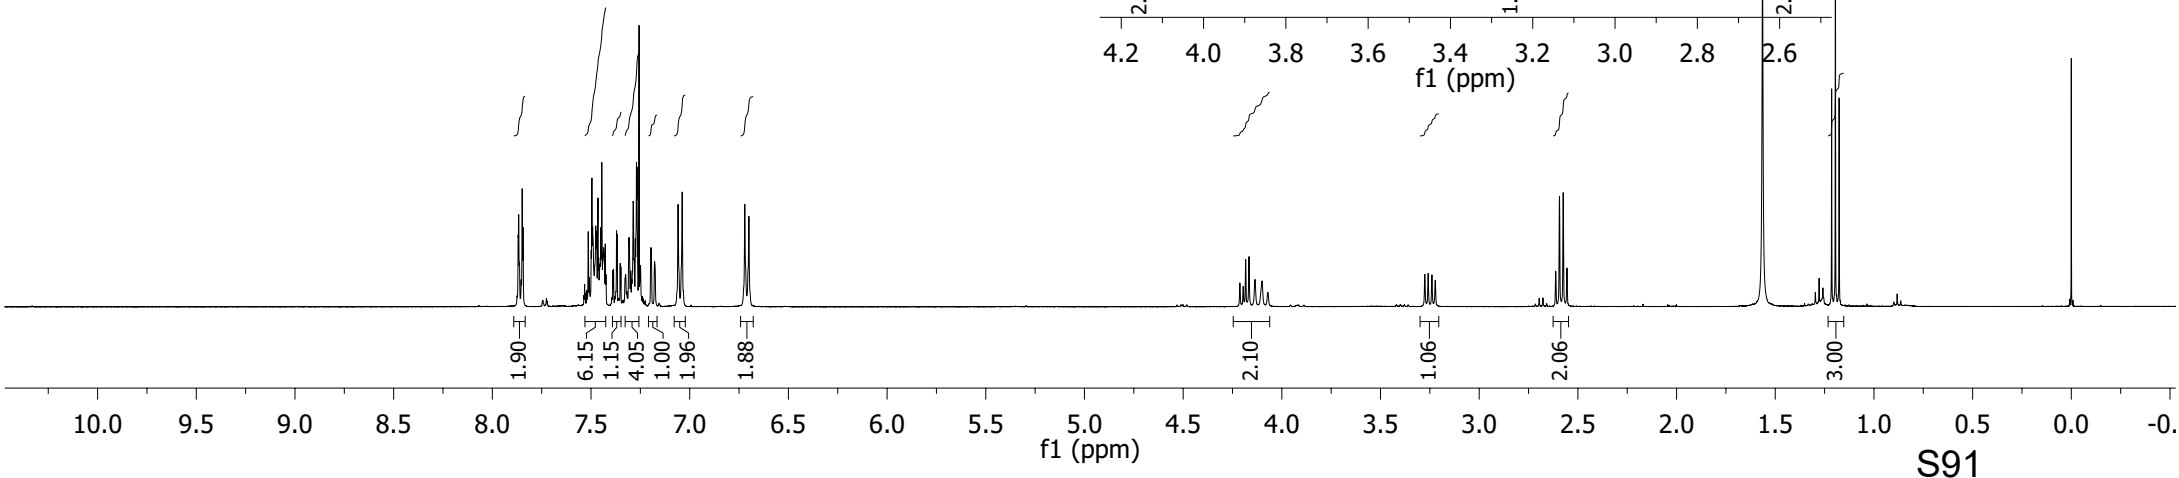

Solvent  $\text{CDCl}_3$   
Spectrometer Frequency 100

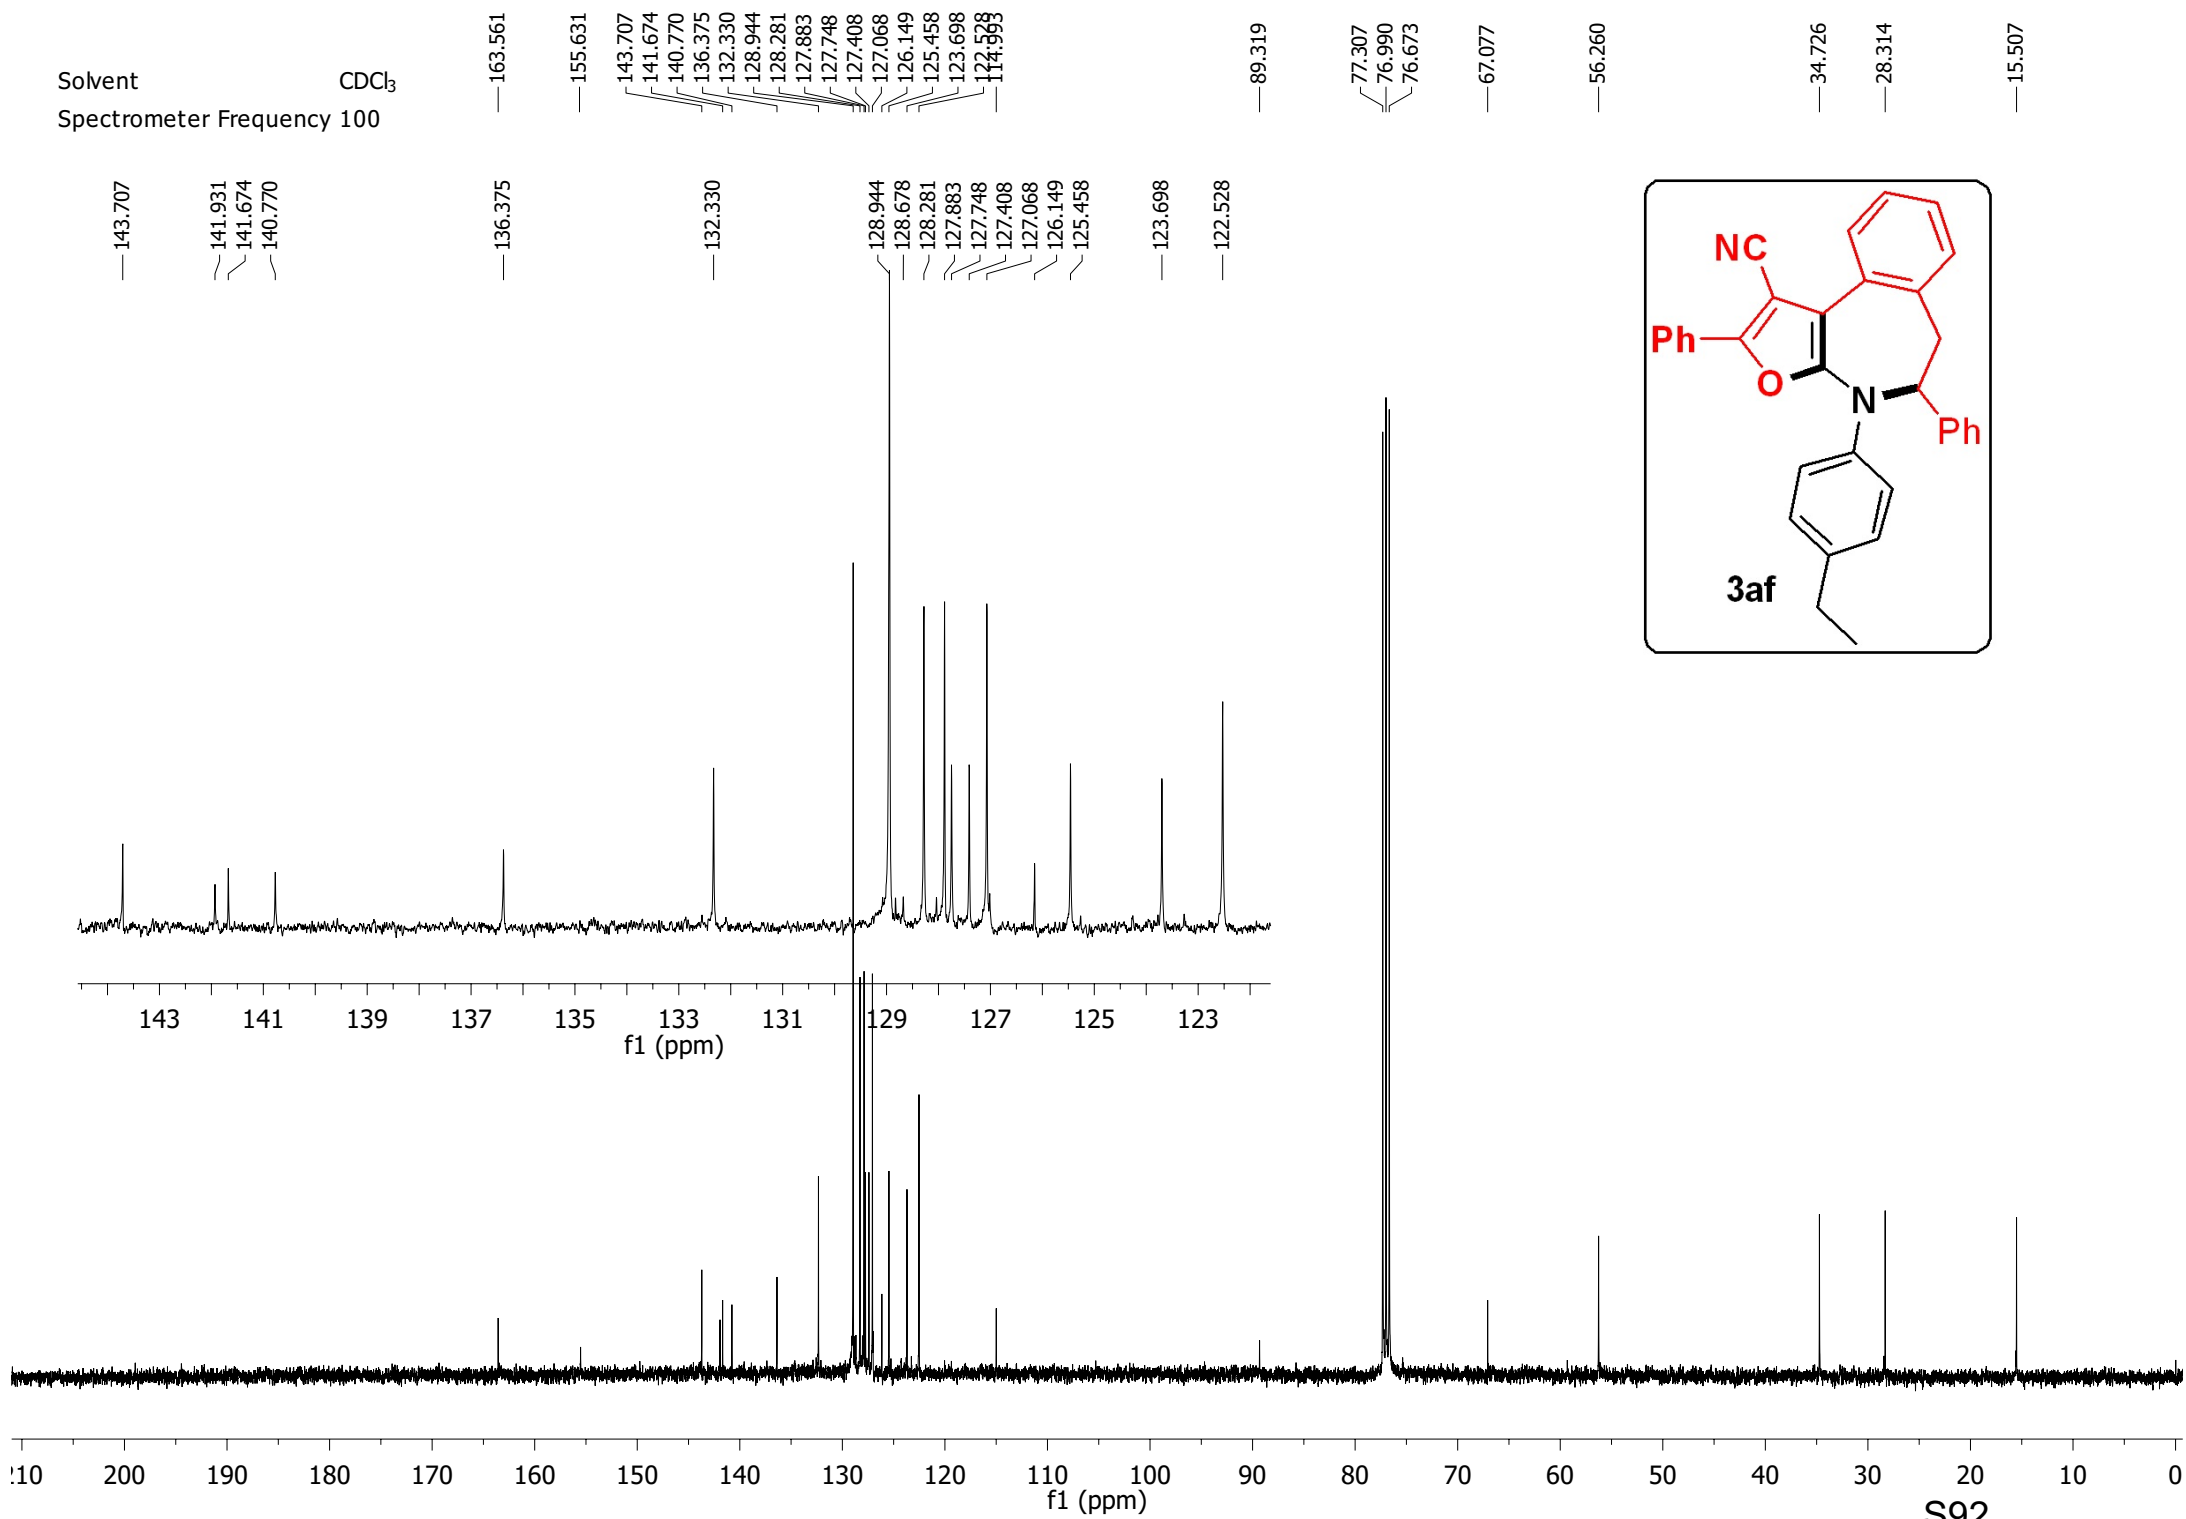



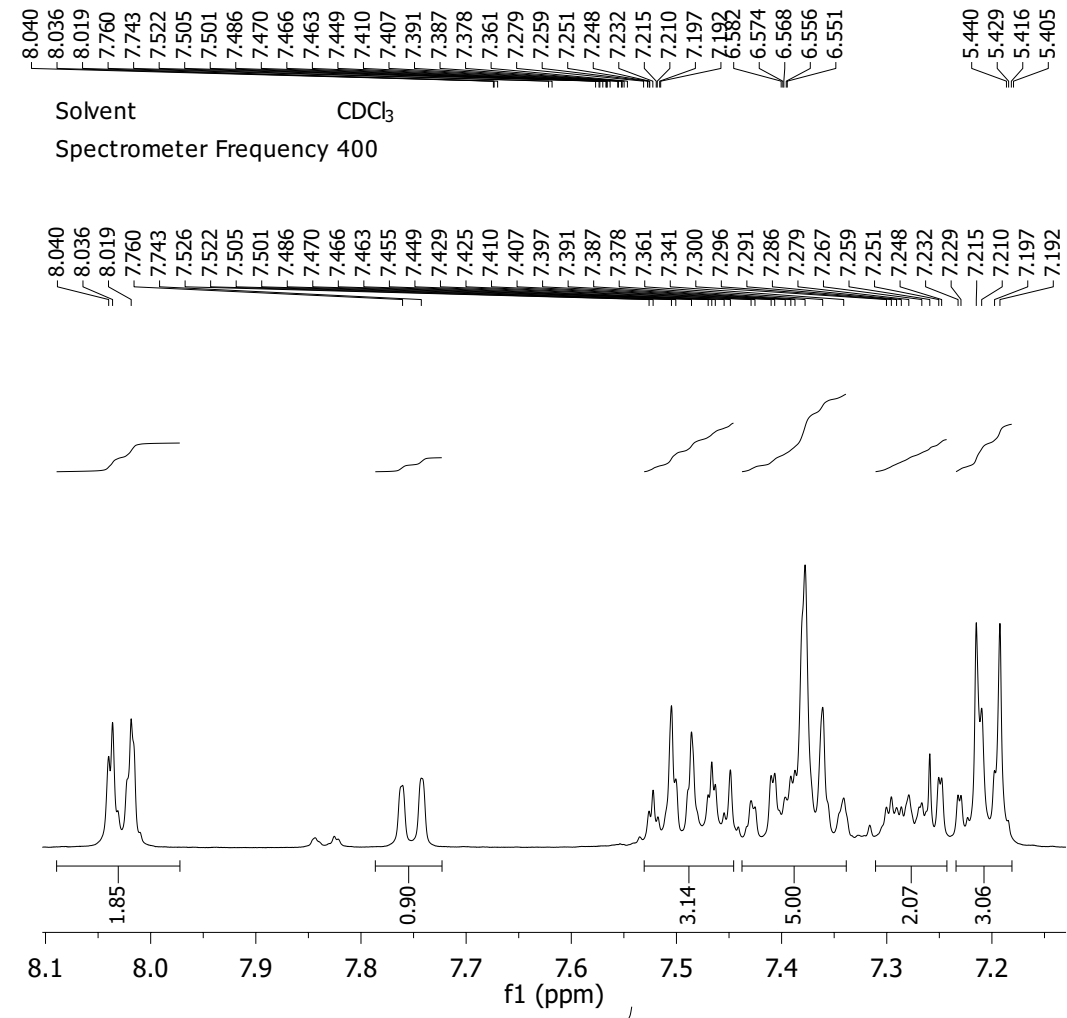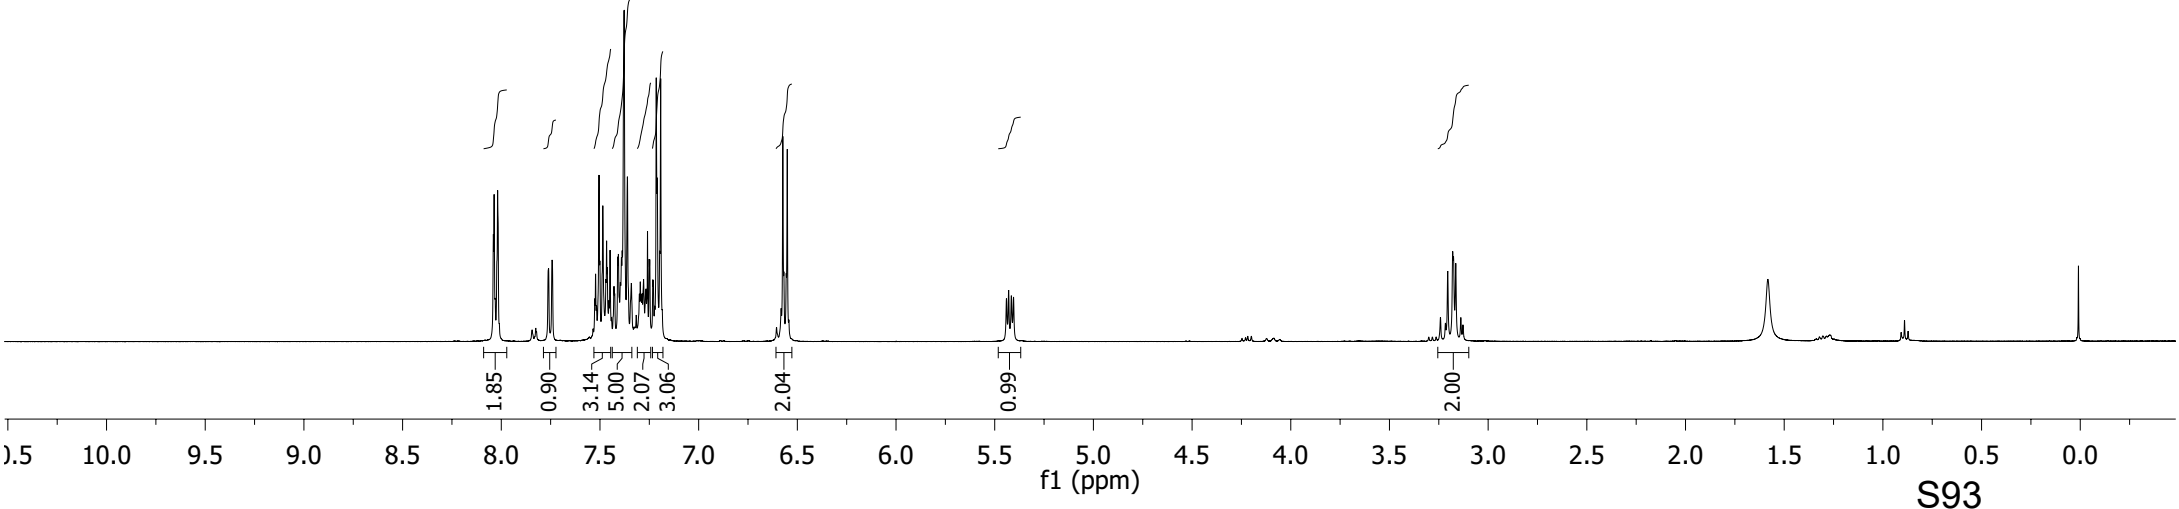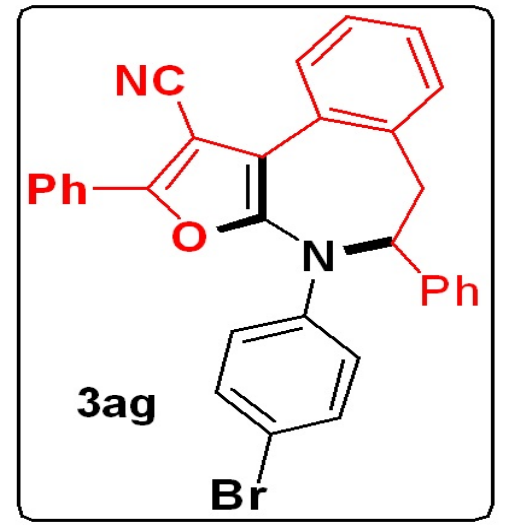

Solvent  $\text{CDCl}_3$   
Spectrometer Frequency 100

155.478  
148.825  
144.611  
142.375  
136.984  
131.794  
129.125  
129.024  
127.880  
125.543  
118.992  
114.665  
114.006

91.697  
77.311  
76.993  
76.676  
74.686  
43.268

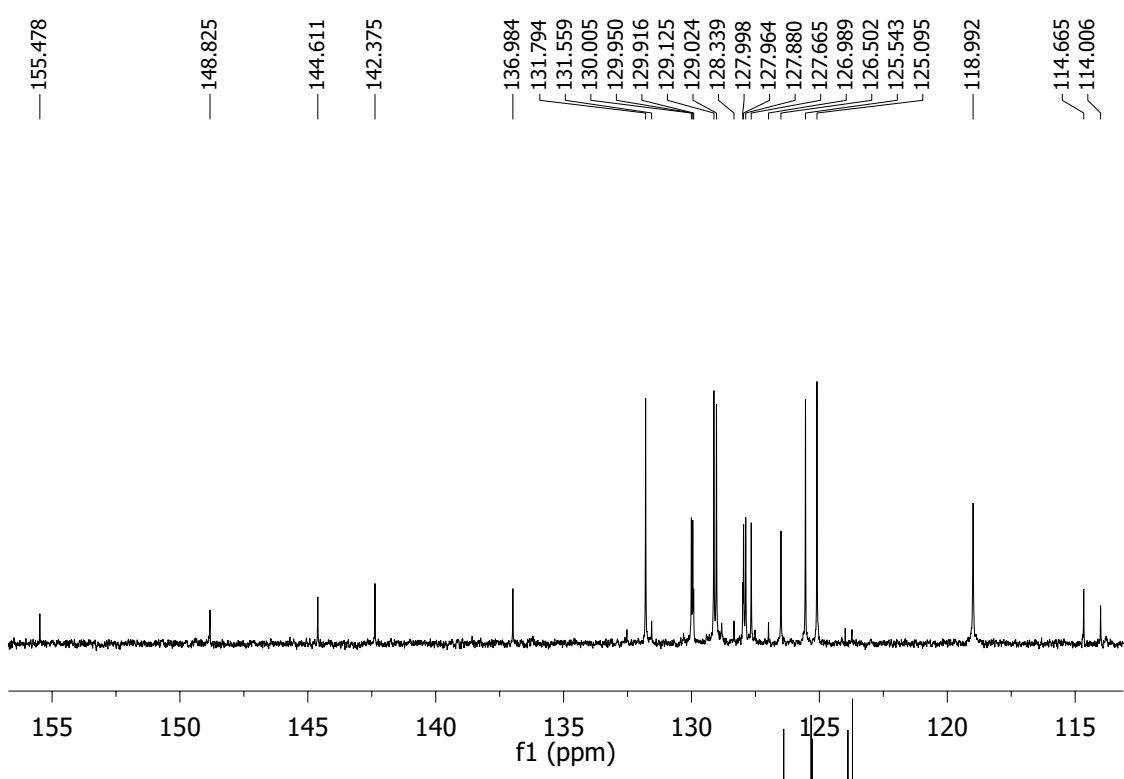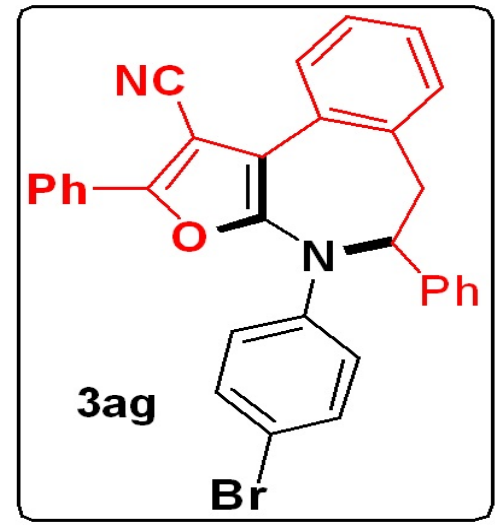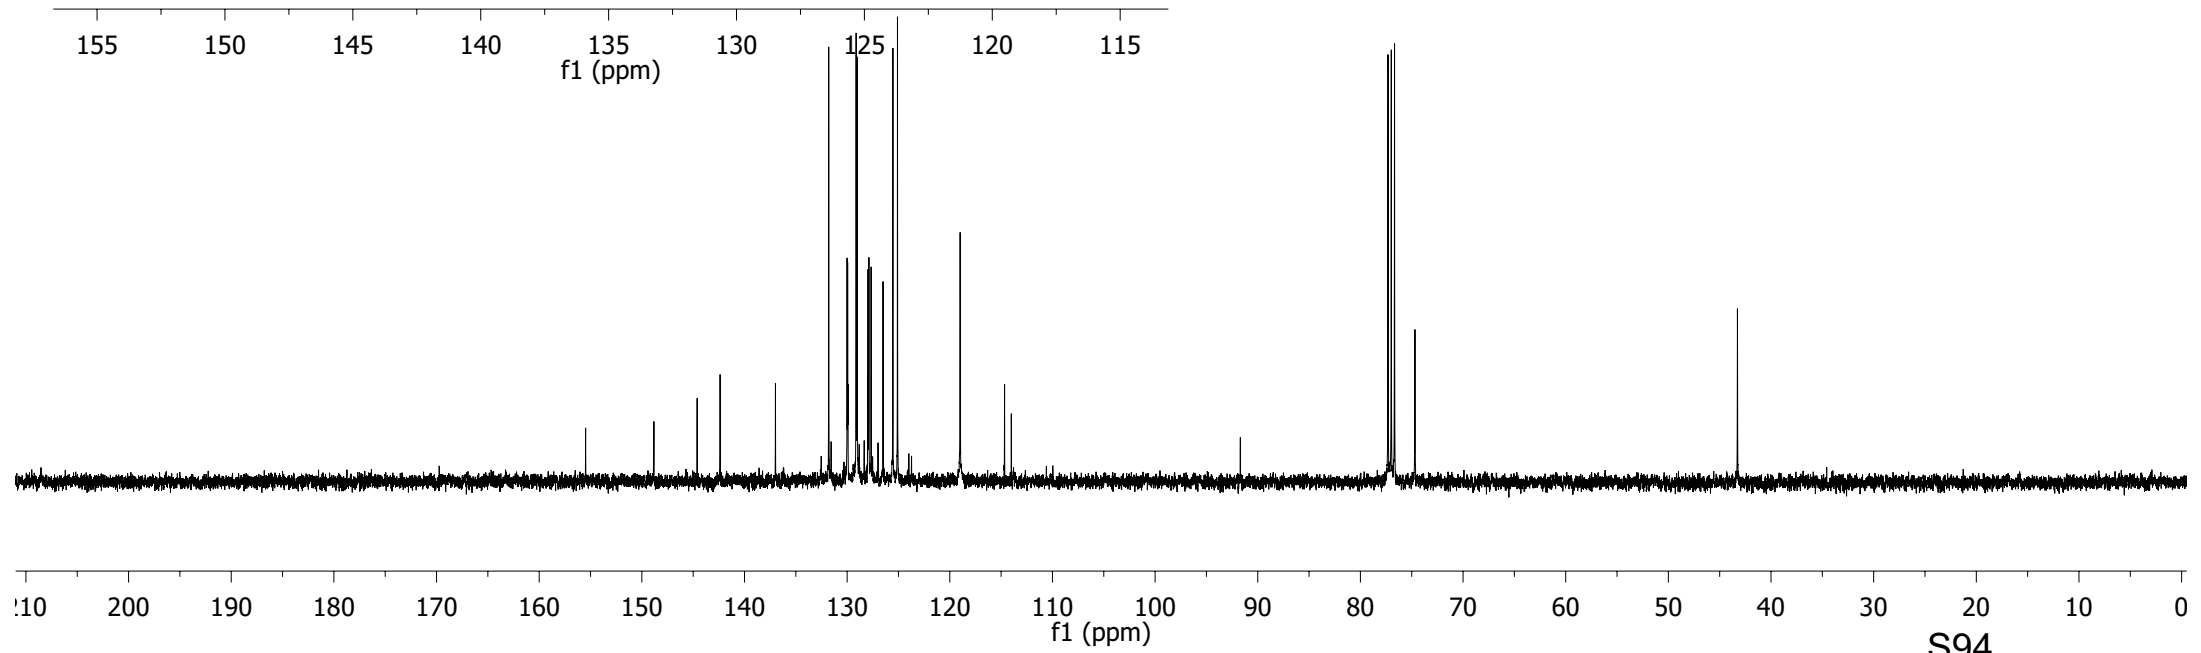

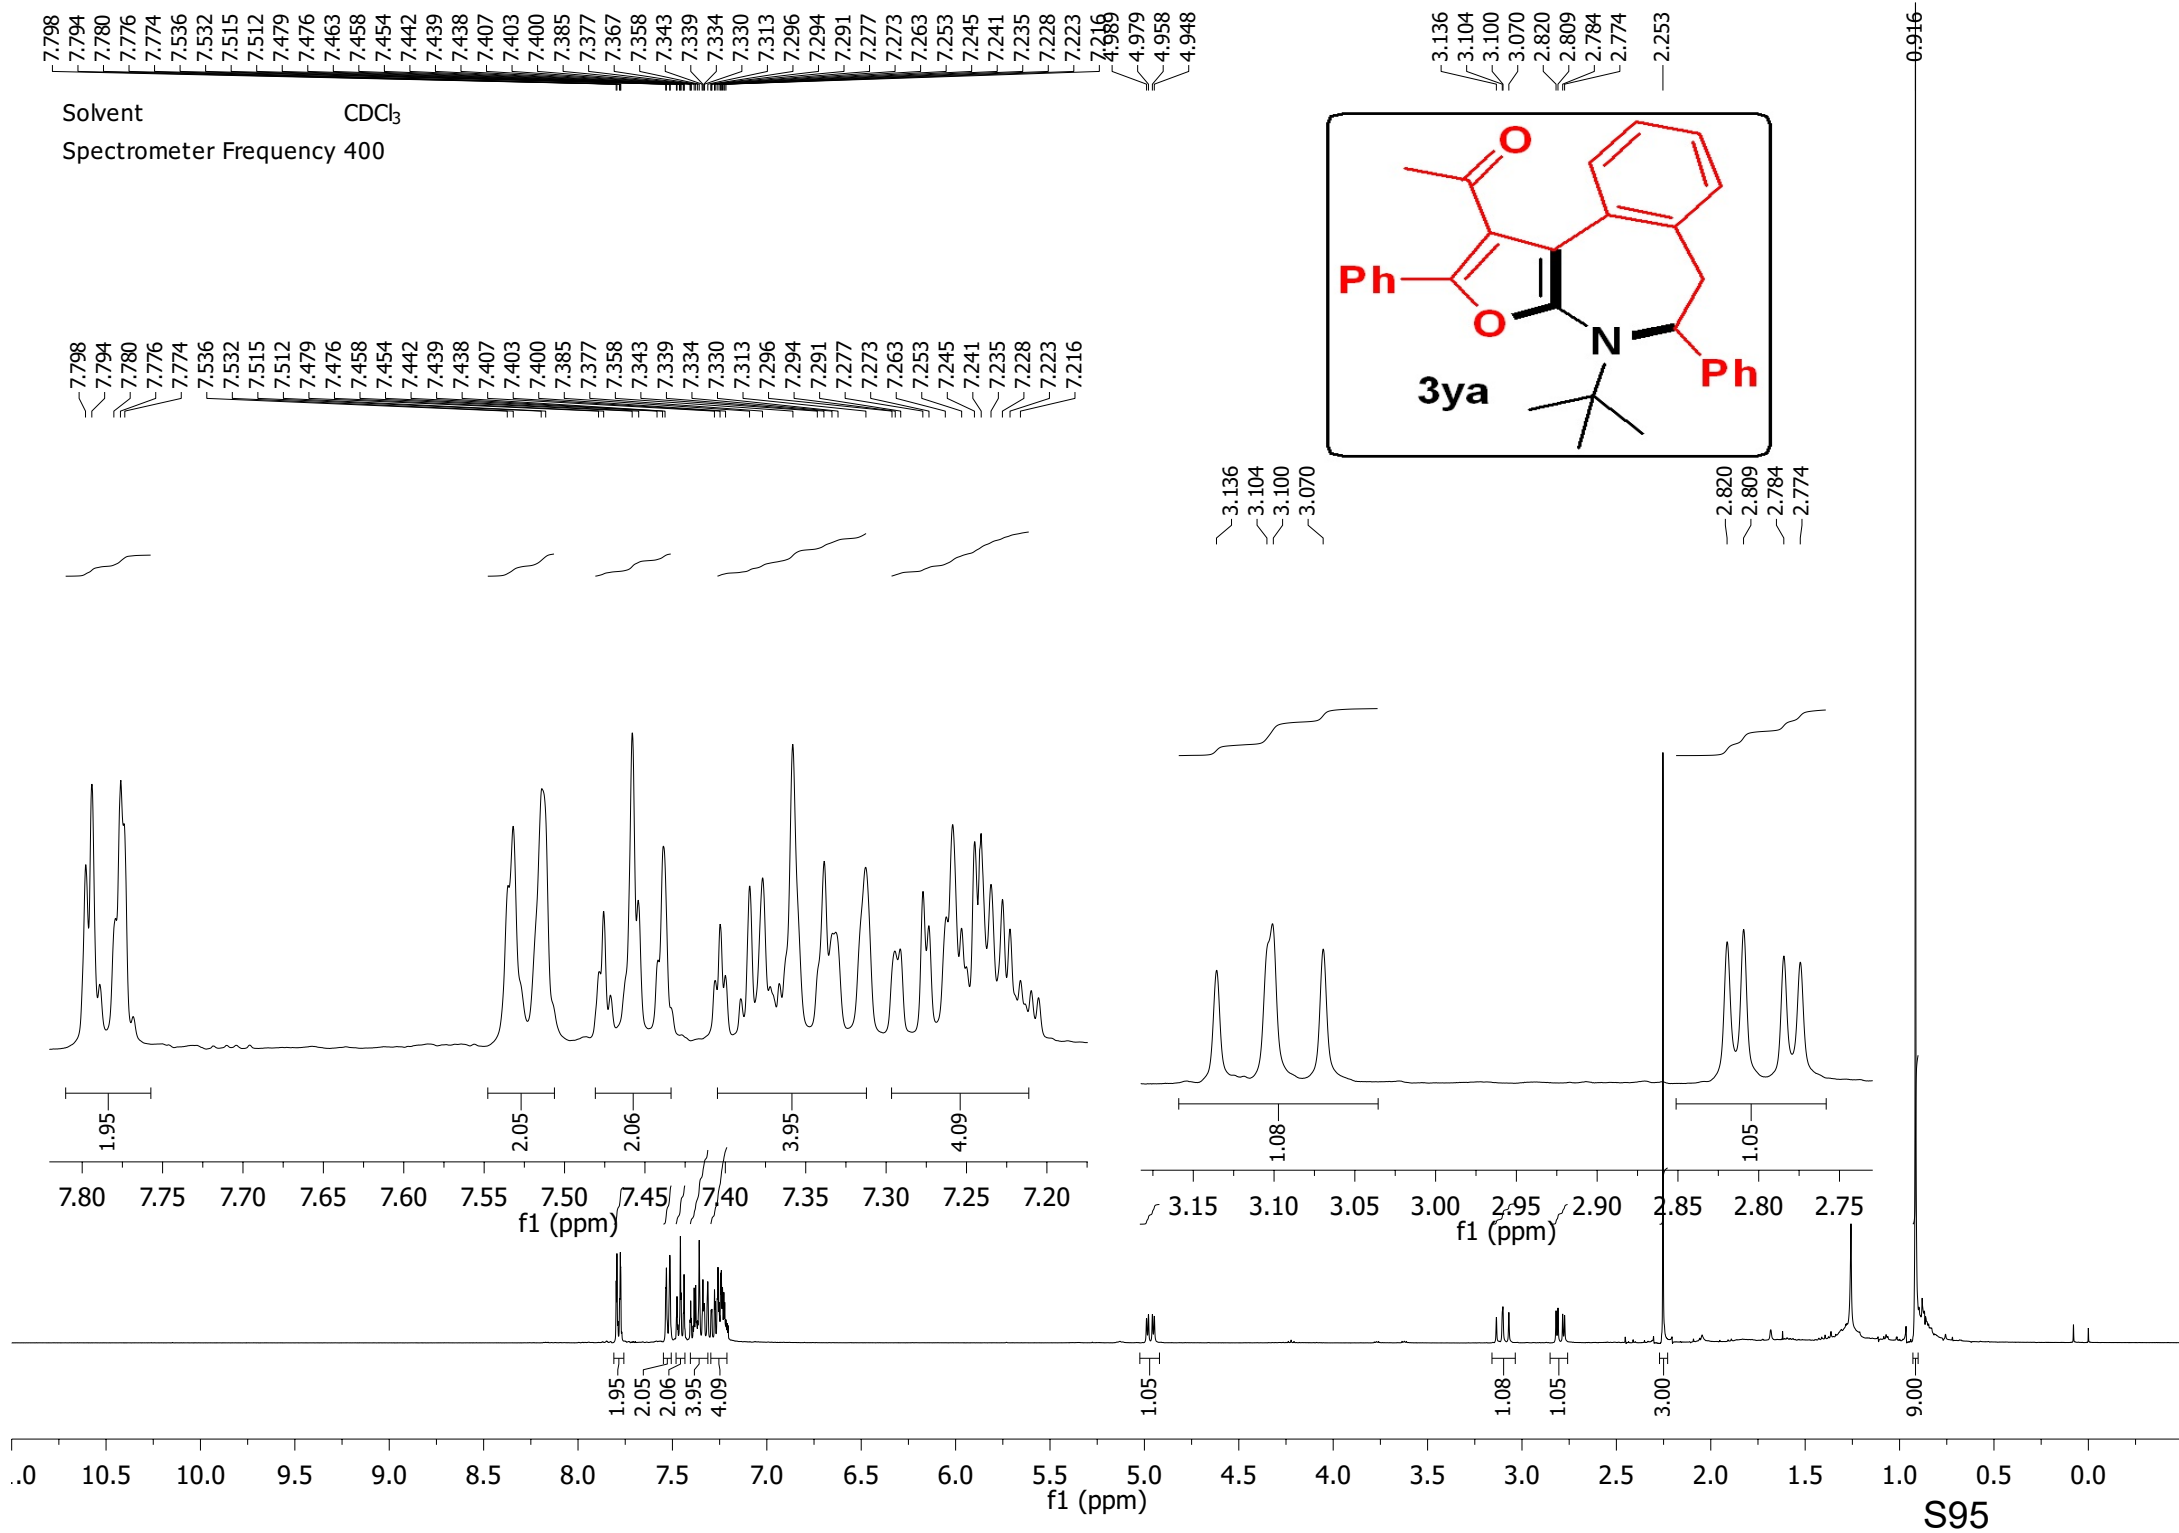

Solvent  $\text{CDCl}_3$   
Spectrometer Frequency 100

— 153.959  
— 148.418  
— 147.335

— 138.616

— 133.109  
— 129.000  
— 128.595  
— 128.506  
— 128.384  
— 127.586  
— 127.279  
— 126.976  
— 126.878  
— 126.612  
— 125.900  
— 125.581

— 115.418

— 153.959  
— 148.418  
— 147.335  
— 138.616  
— 128.595  
— 128.506  
— 128.384  
— 127.586  
— 127.279  
— 126.976  
— 126.612  
— 125.900  
— 115.418

— 77.308  
— 76.991  
— 76.673  
— 70.771  
— 58.648  
— 44.391  
— 31.500  
— 28.881

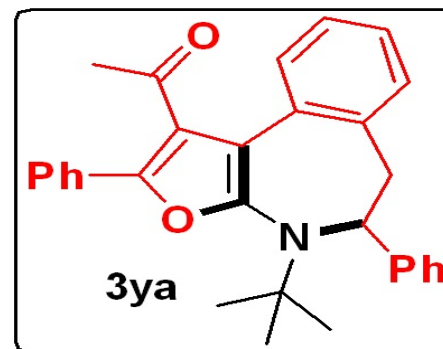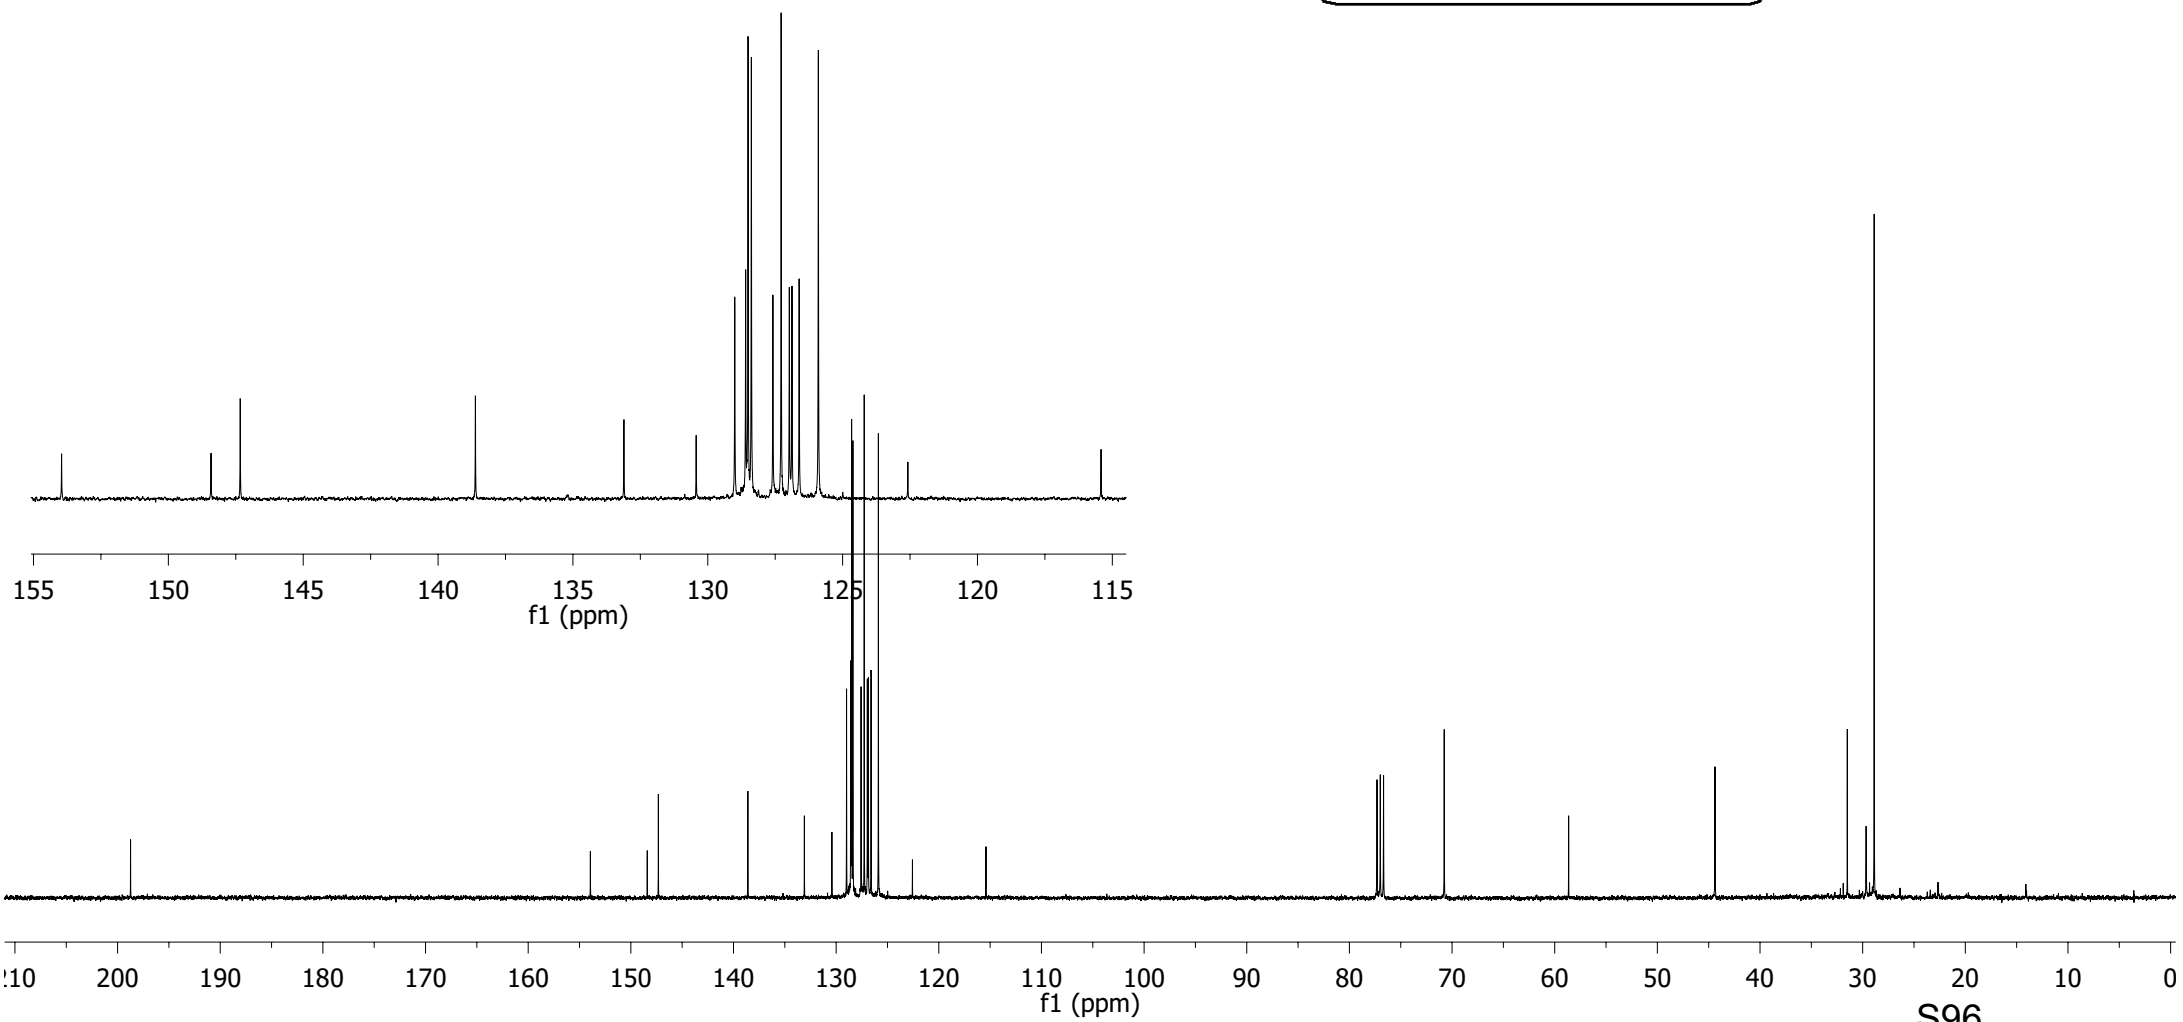

Solvent  $\text{CDCl}_3$   
Spectrometer Frequency 597

7.881  
7.823  
7.811  
7.506  
7.493  
7.459  
7.444  
7.435  
7.432  
7.349  
7.300  
7.249  
7.237  
7.224  
5.863  
5.584  
4.964

3.057  
2.795  
2.788  
2.771  
2.764

0.929  
-0.000

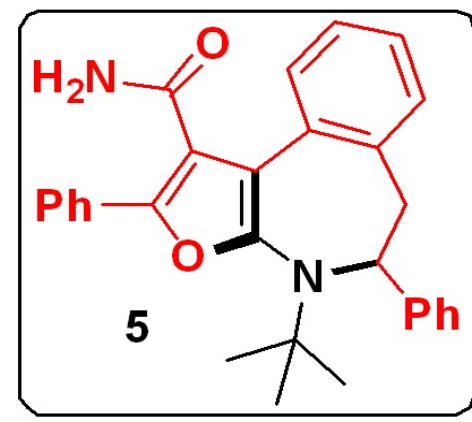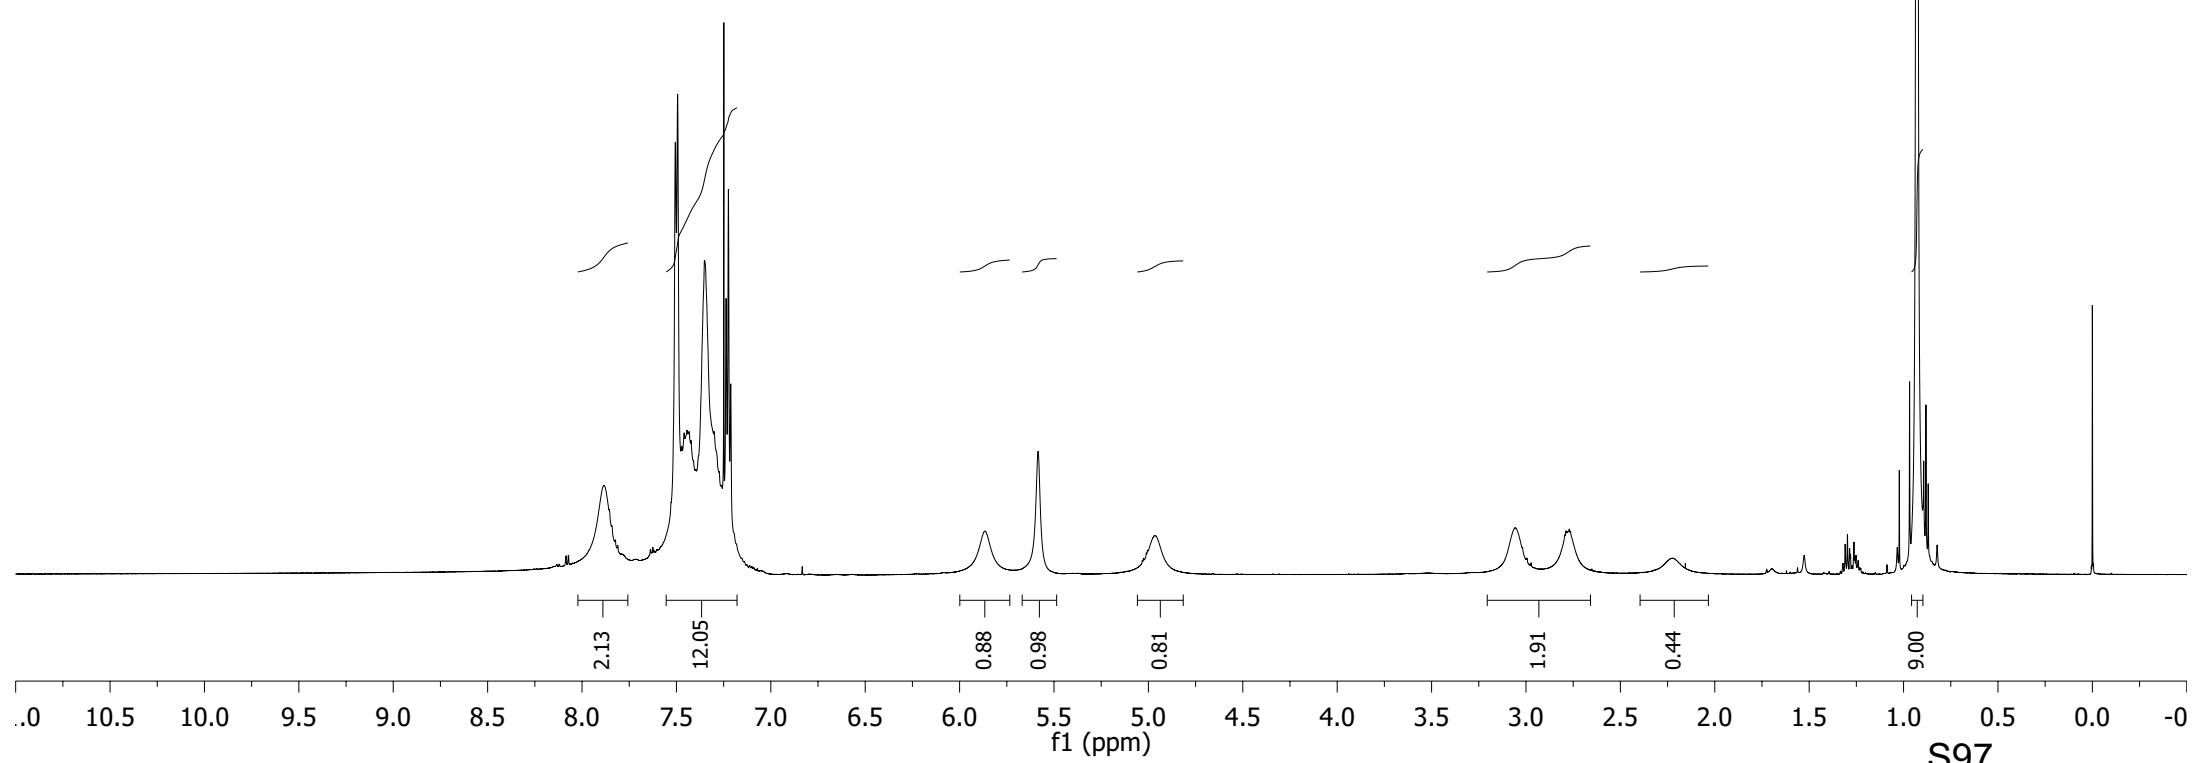

S97

Solvent  $\text{CDCl}_3$   
Spectrometer Frequency 150

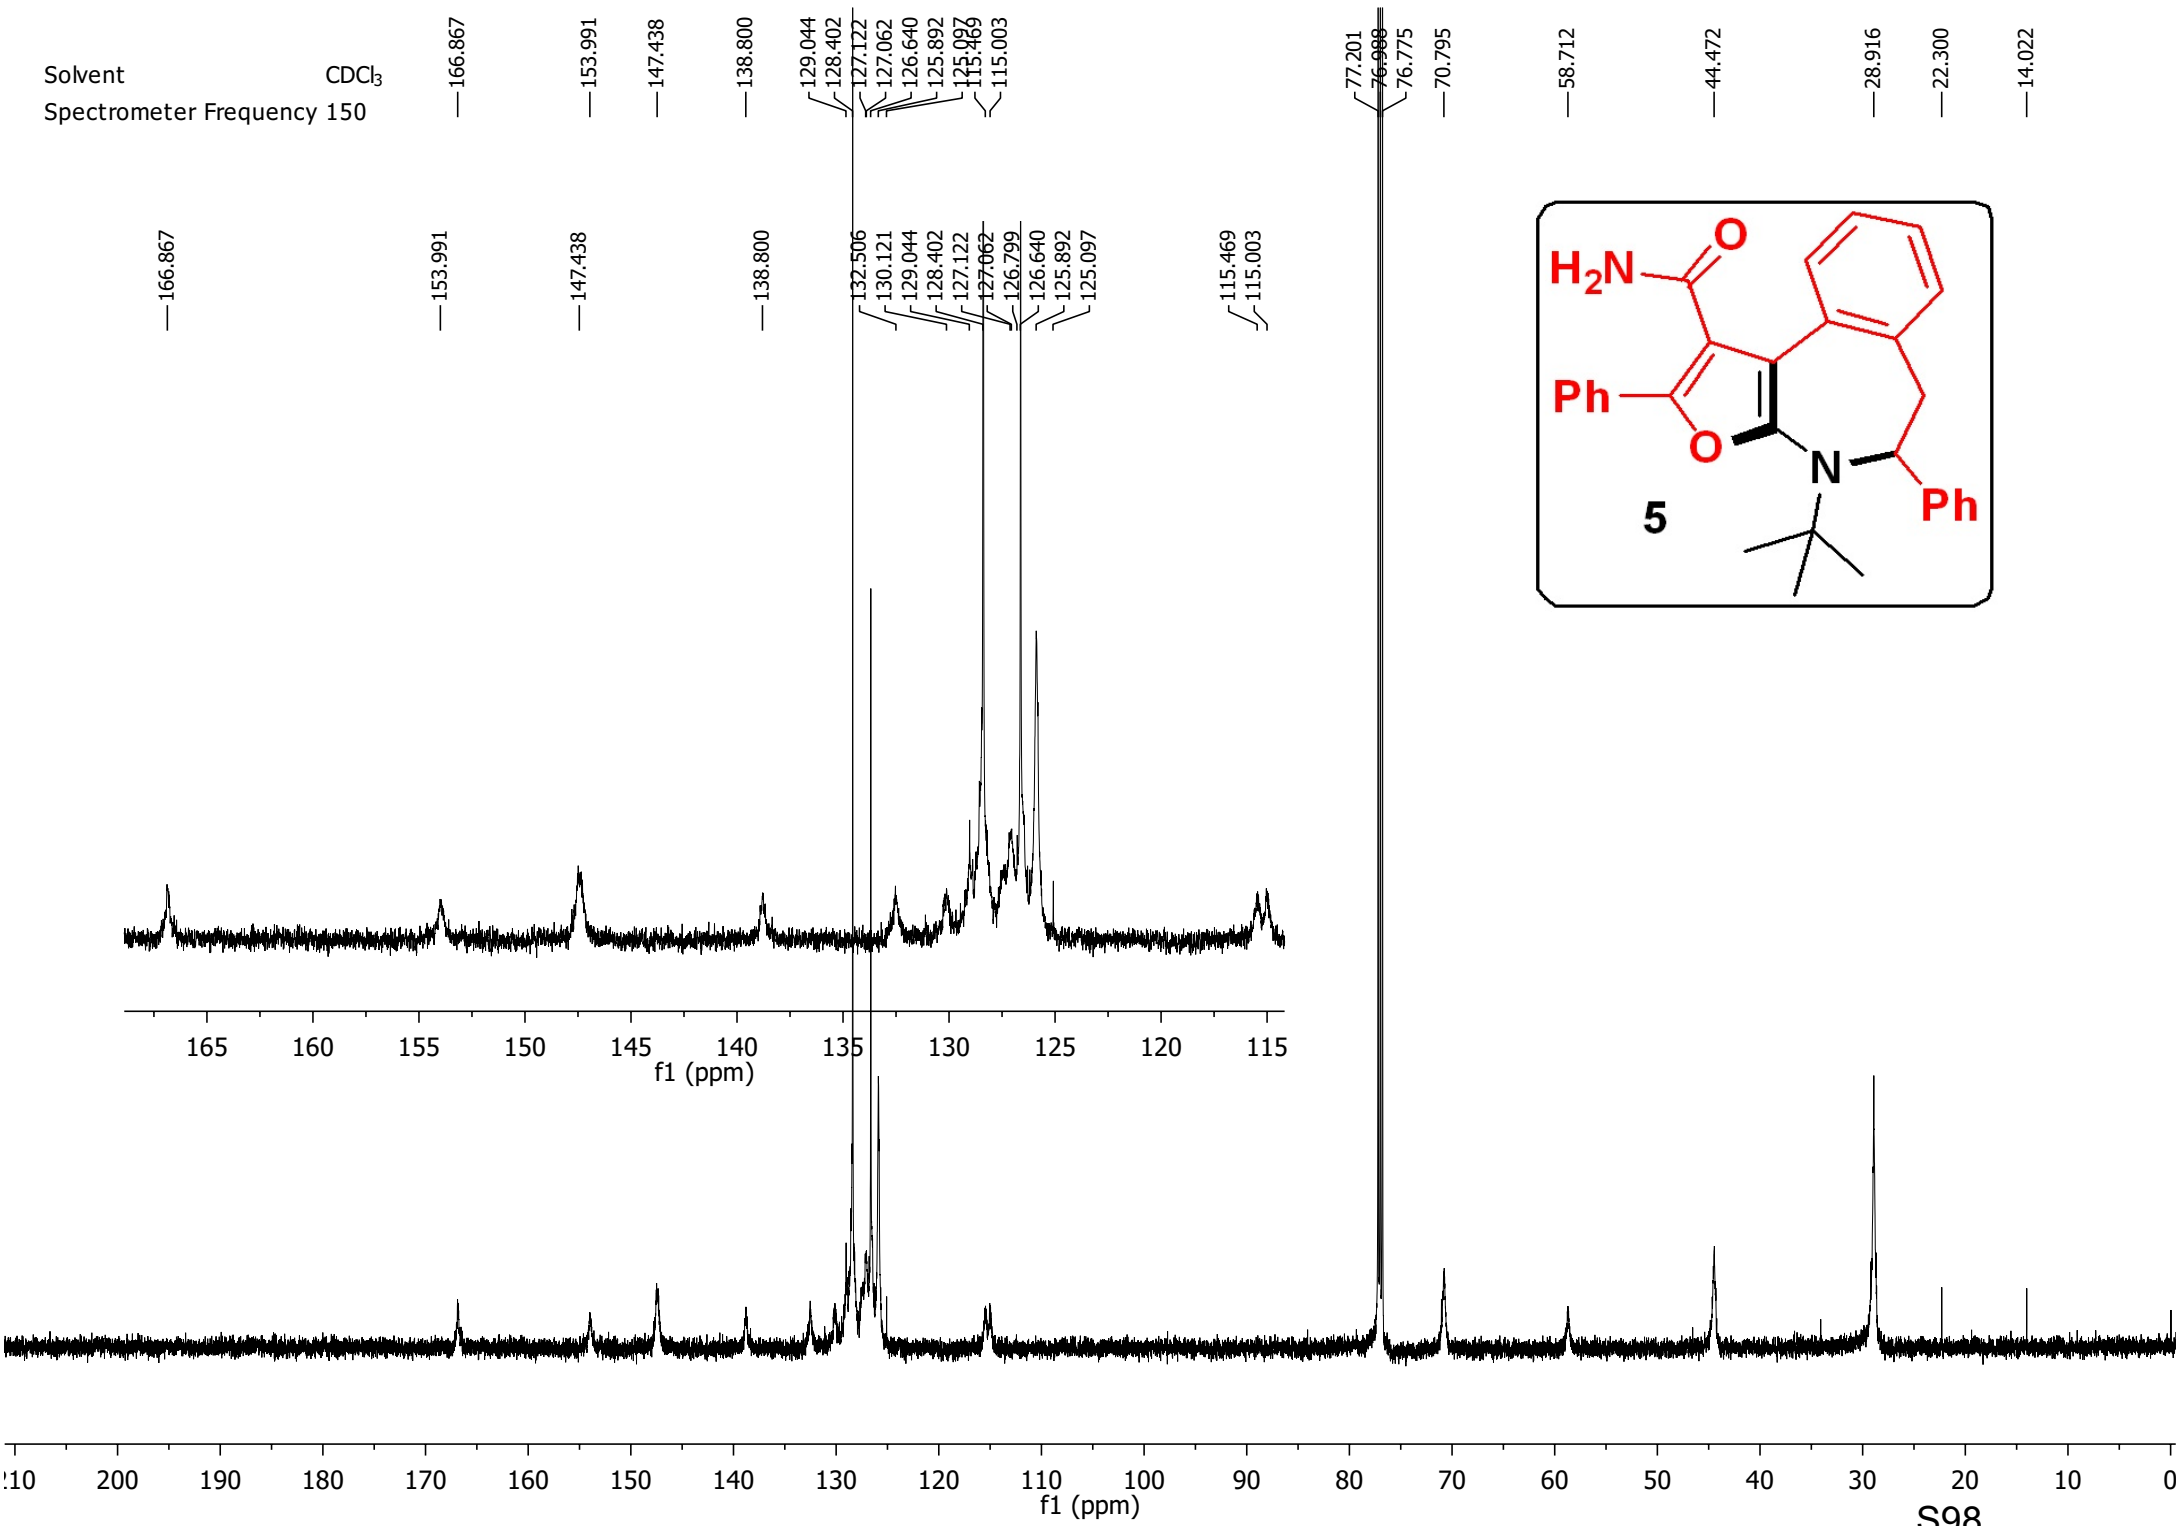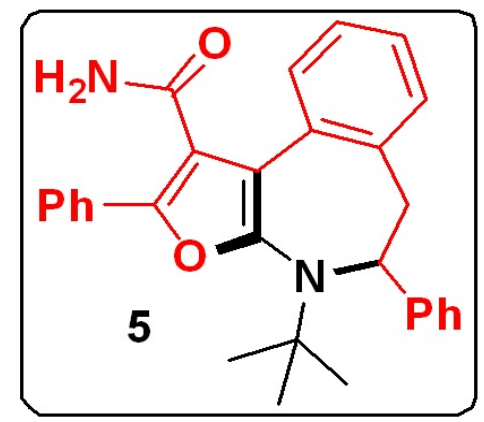

Solvent  $\text{CDCl}_3$   
Spectrometer Frequency 597

8.082  
8.080  
8.077  
8.071  
8.068  
8.065  
7.749  
7.746  
7.742  
7.740  
7.738  
7.734  
7.681  
7.678  
7.676  
7.666  
7.656  
7.654  
7.651  
7.565  
7.563  
7.552  
7.542  
7.539  
7.440  
7.437  
7.432  
7.426  
7.426  
7.386  
7.377  
7.374  
7.371  
7.363  
7.354  
7.349  
7.343  
7.336  
7.229  
7.224  
7.214  
7.666  
7.654  
7.565  
7.552  
7.440  
7.437  
7.432  
7.426  
7.426  
7.386  
7.377  
7.374  
7.371  
7.363  
7.354  
7.349  
7.343  
7.336  
6.139  
4.953  
4.937

3.469  
3.450  
3.441  
3.423  
3.354  
3.326

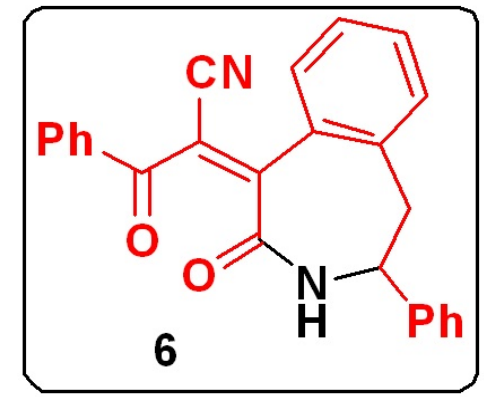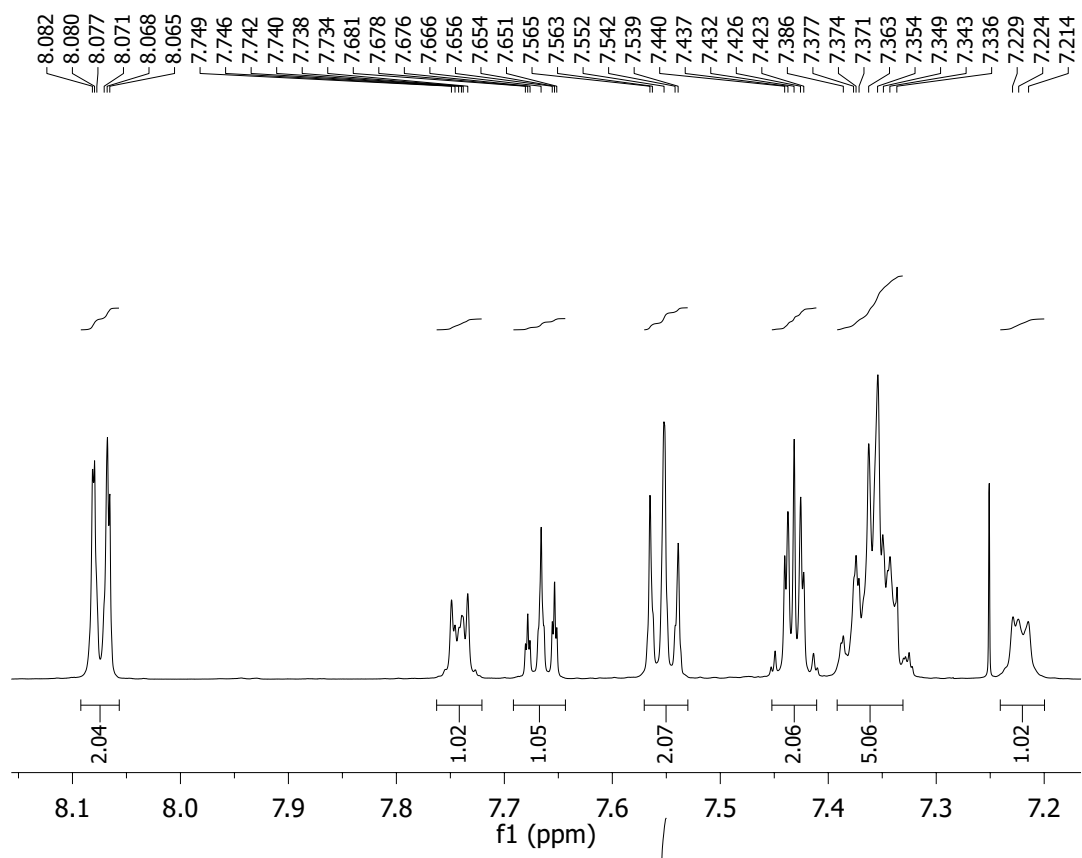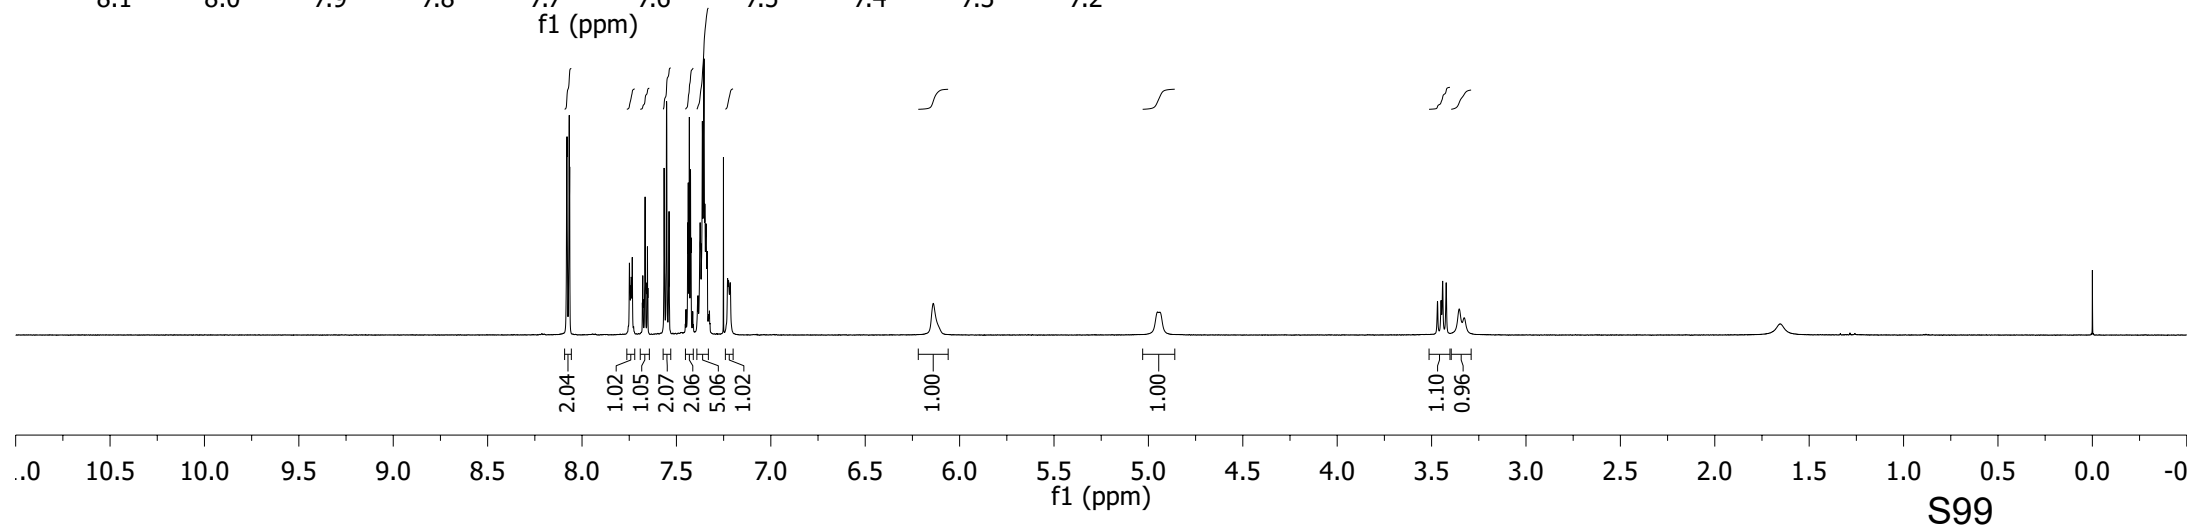

S99

Solvent  $\text{CDCl}_3$   
Spectrometer Frequency 150

187.748

166.007

159.687

139.843

135.931

134.737

134.456

131.241

130.922

130.290

129.704

129.137

129.064

128.932

128.618

127.605

126.359

117.933

114.965

77.203

76.990

76.777

57.140

40.437

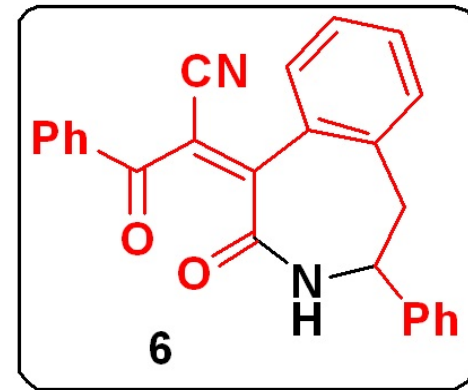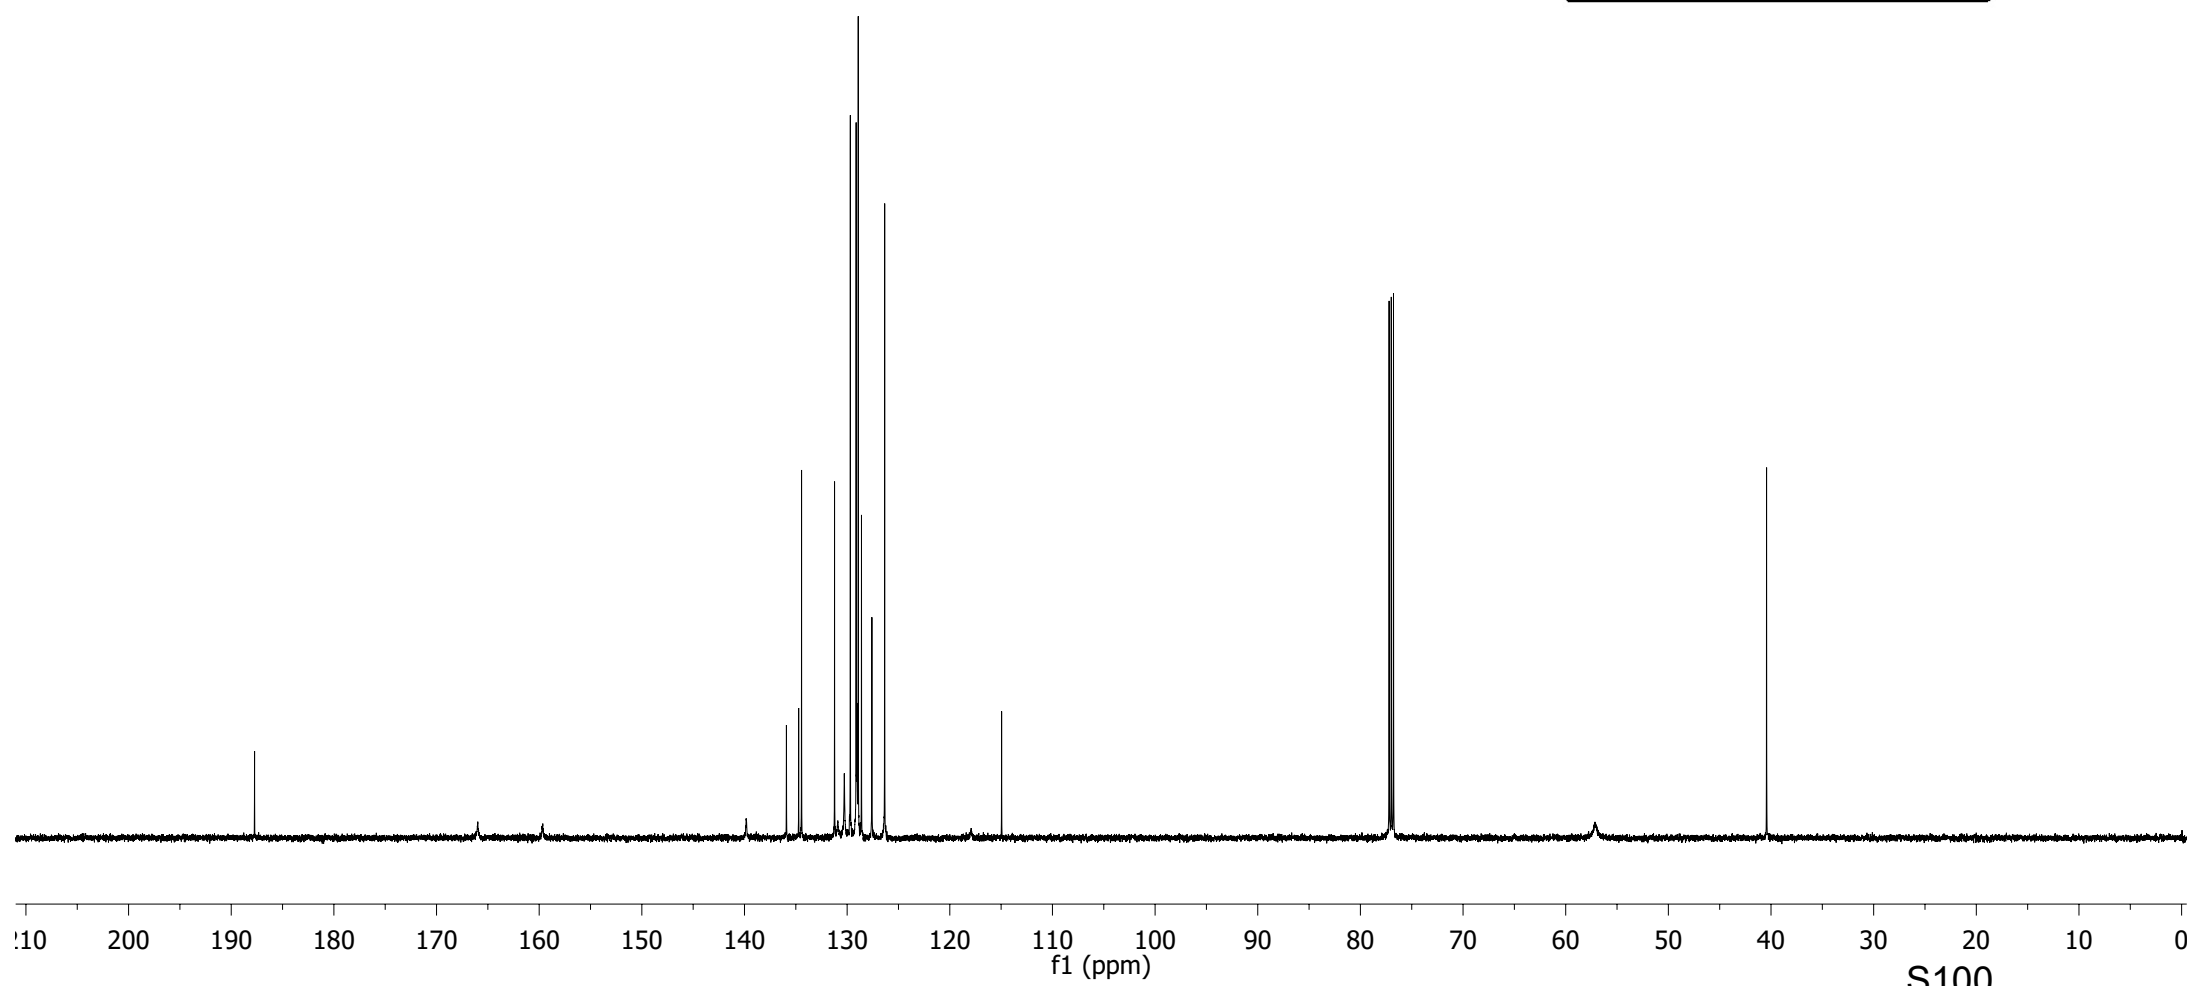



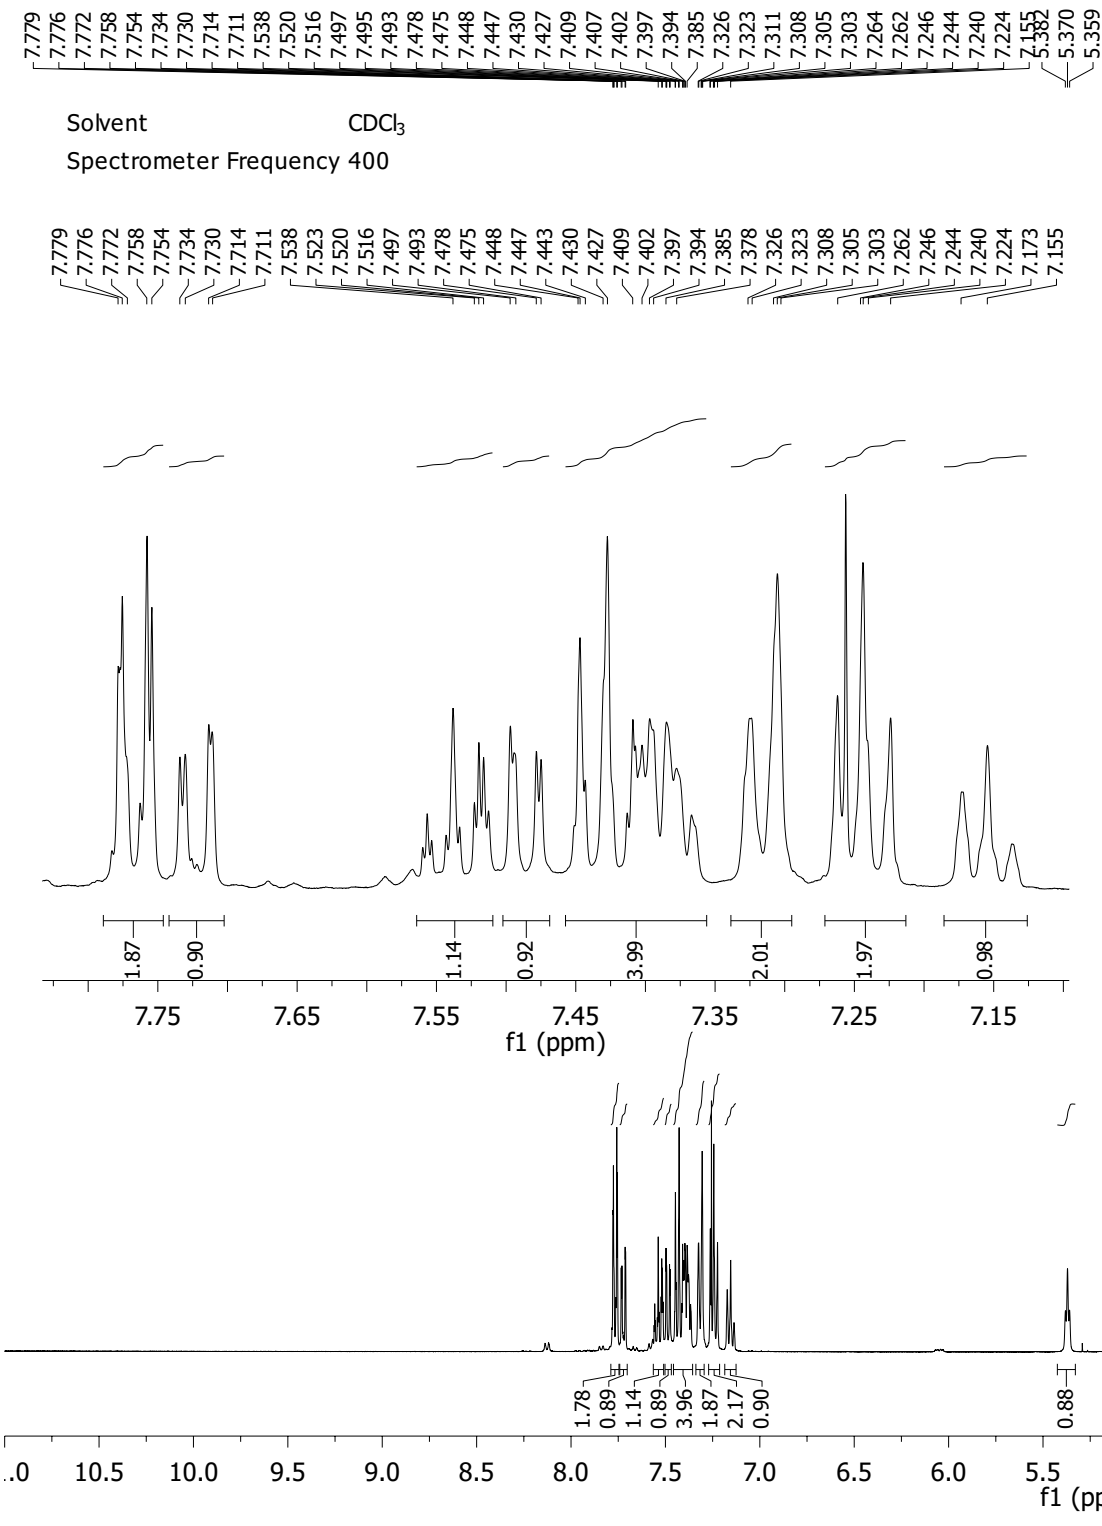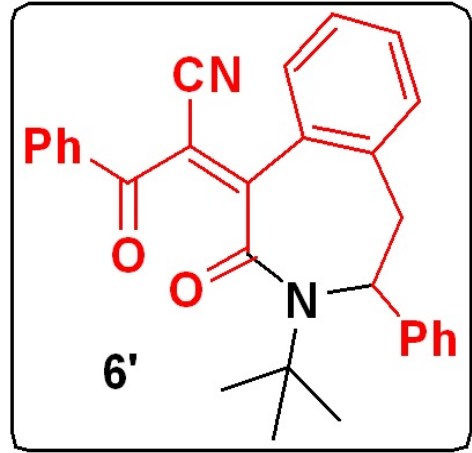

3.856  
3.846  
3.811  
3.800  
3.550  
3.538  
3.504  
3.493

1.637

Solvent  $\text{CDCl}_3$   
Spectrometer Frequency 100

186.040  
166.534  
165.065  
138.844  
136.188  
136.032  
133.240  
131.783  
130.477  
130.380  
130.262  
128.956  
128.316  
128.296  
127.441  
127.334  
127.172  
116.723  
110.709

77.310  
76.993  
76.675  
59.607  
54.736  
36.713  
29.089

138.844  
136.188  
136.032  
133.240  
131.783  
130.477  
130.380  
130.262  
128.956  
128.316  
128.296  
127.441  
127.334  
127.172

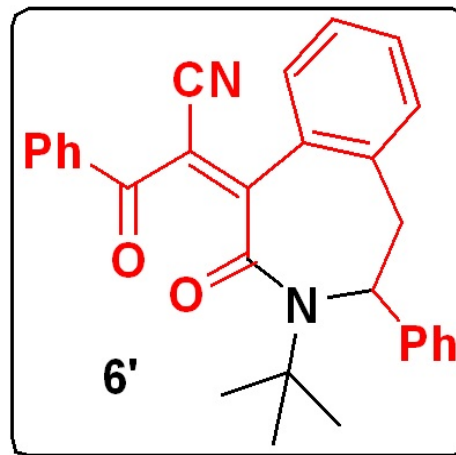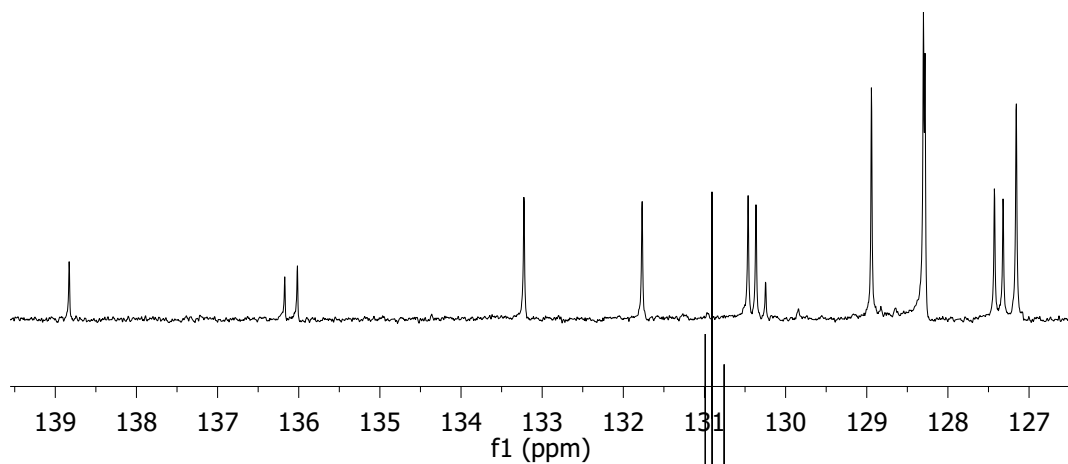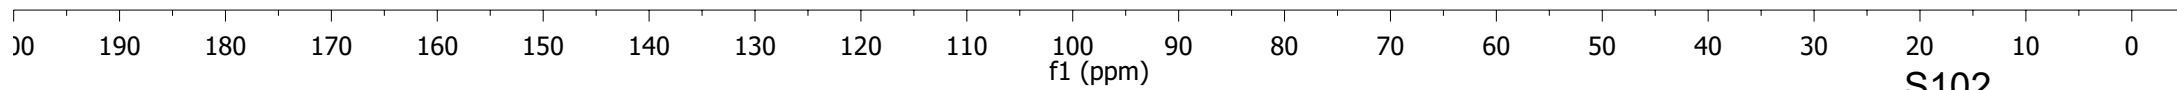

S102

Solvent  $\text{CDCl}_3$   
Spectrometer Frequency 400

8.142  
7.970  
7.950  
7.642  
7.525  
7.506  
7.494  
7.489  
7.474  
7.469  
7.426  
7.421  
7.404  
7.391  
7.373  
7.353  
7.329  
7.314  
7.309  
7.289  
7.272  
7.254  
7.236  
7.229  
7.207  
7.188  
7.176  
5.048  
5.039  
5.018  
5.008

3.049  
3.013  
2.982  
2.814  
2.805  
2.778  
2.769  
2.379

0.985

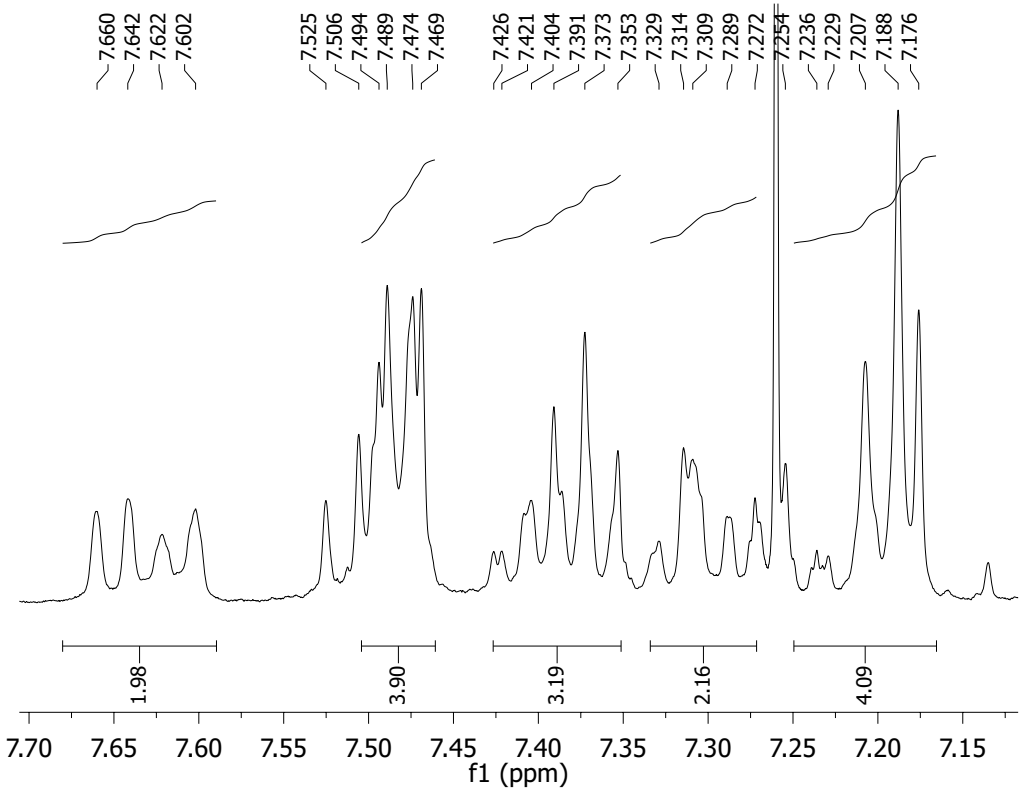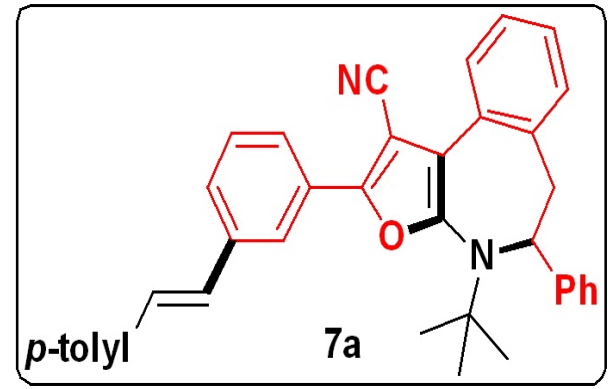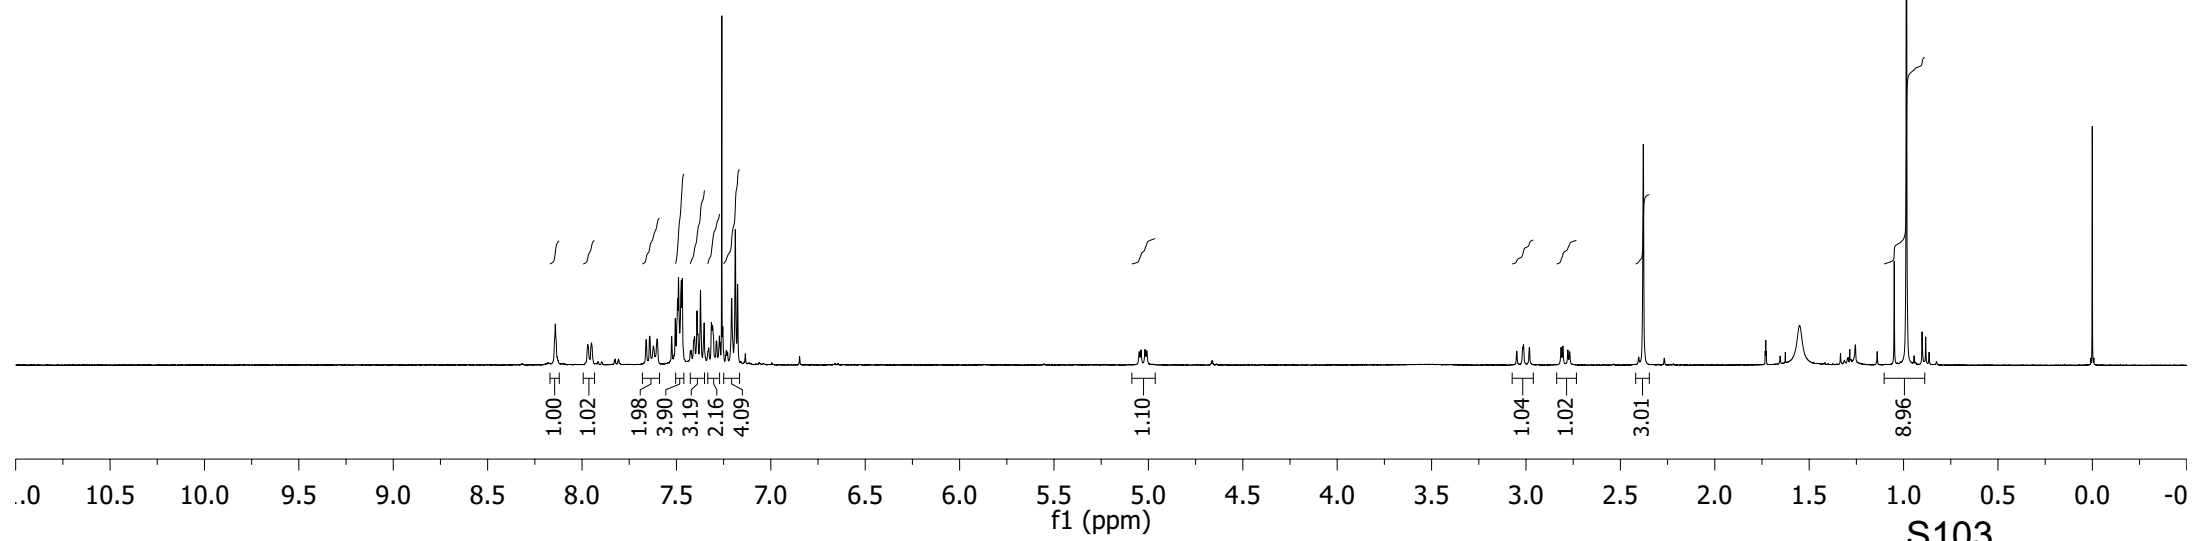

Solvent  $\text{CDCl}_3$   
Spectrometer Frequency 100

154.580  
146.975  
137.919  
134.169  
129.921  
129.439  
129.382  
129.303  
128.512  
127.729  
127.628  
126.876  
126.825  
126.647  
125.859  
116.270  
115.089

138.413  
137.919  
134.169  
131.115  
129.921  
129.439  
129.382  
129.303  
128.512  
127.729  
127.628  
126.876  
126.825  
126.647  
125.859  
123.280

91.226  
77.317  
77.000  
76.683  
71.059  
59.057  
44.318  
28.951  
21.295

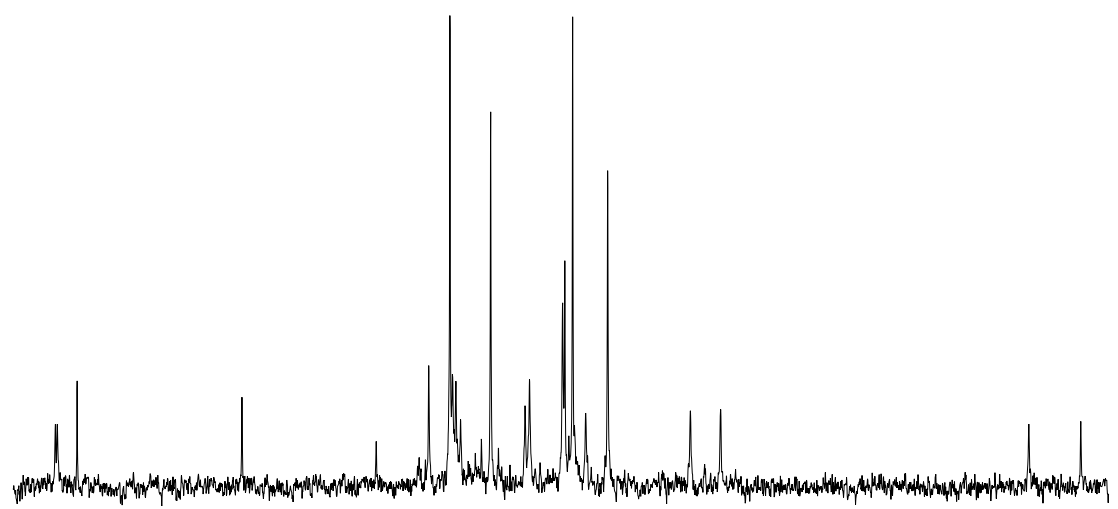

135 130 125 120 115

f1 (ppm)

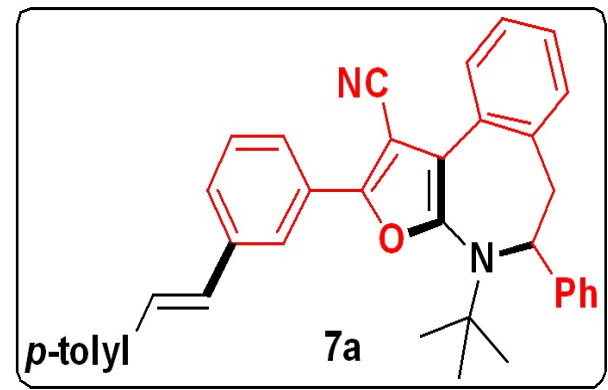

30 170 160 150 140 130 120 110 100 90 80 70 60 50 40 30 20 10 0

f1 (ppm)

S104

8.215  
7.930  
7.865  
7.860  
7.851  
7.845  
7.834  
7.821  
7.809  
7.806  
7.794  
7.792  
7.665  
7.657  
7.552  
7.539  
7.501  
7.498  
7.496  
7.490  
7.487  
7.484  
7.477  
7.474  
7.471  
7.463  
7.461  
7.459  
7.450  
7.447  
7.409  
7.400  
7.388  
7.385  
7.381  
7.376  
7.363  
7.347  
7.319  
7.268  
7.266  
7.256  
7.253  
7.244  
5.045  
5.026

3.048  
3.026  
3.023  
3.003  
2.815  
2.809  
2.791  
2.785

0.998

Solvent  $\text{CDCl}_3$   
Spectrometer Frequency 597

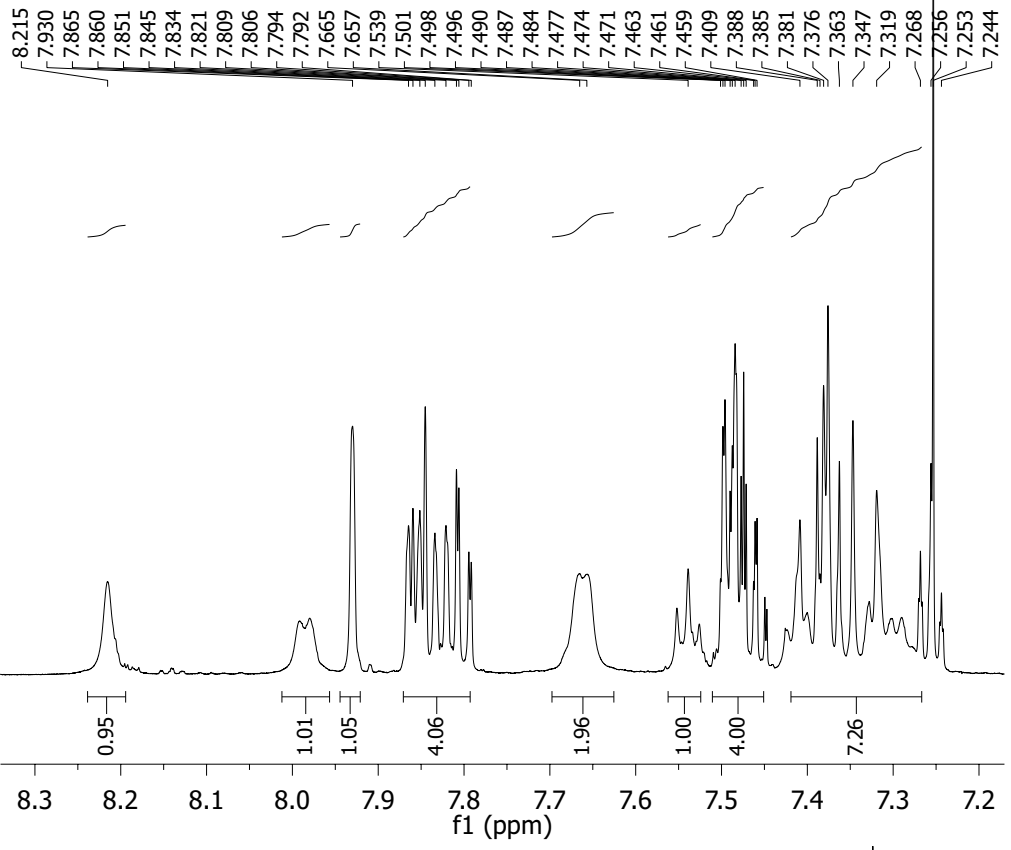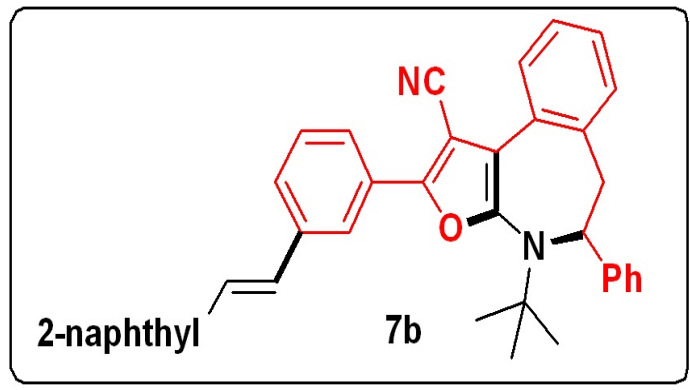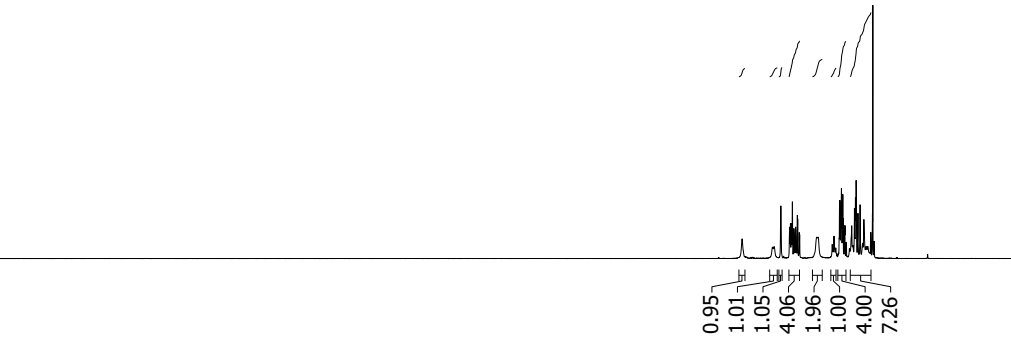

0.95  
1.01  
1.05  
4.06  
1.96  
1.00  
4.00  
7.26  
1.05  
1.08  
1.05  
9.00

13 12 11 10 9 8 7 6 5 4 3 2 1 0 -1

Solvent  $\text{CDCl}_3$   
Spectrometer Frequency 150

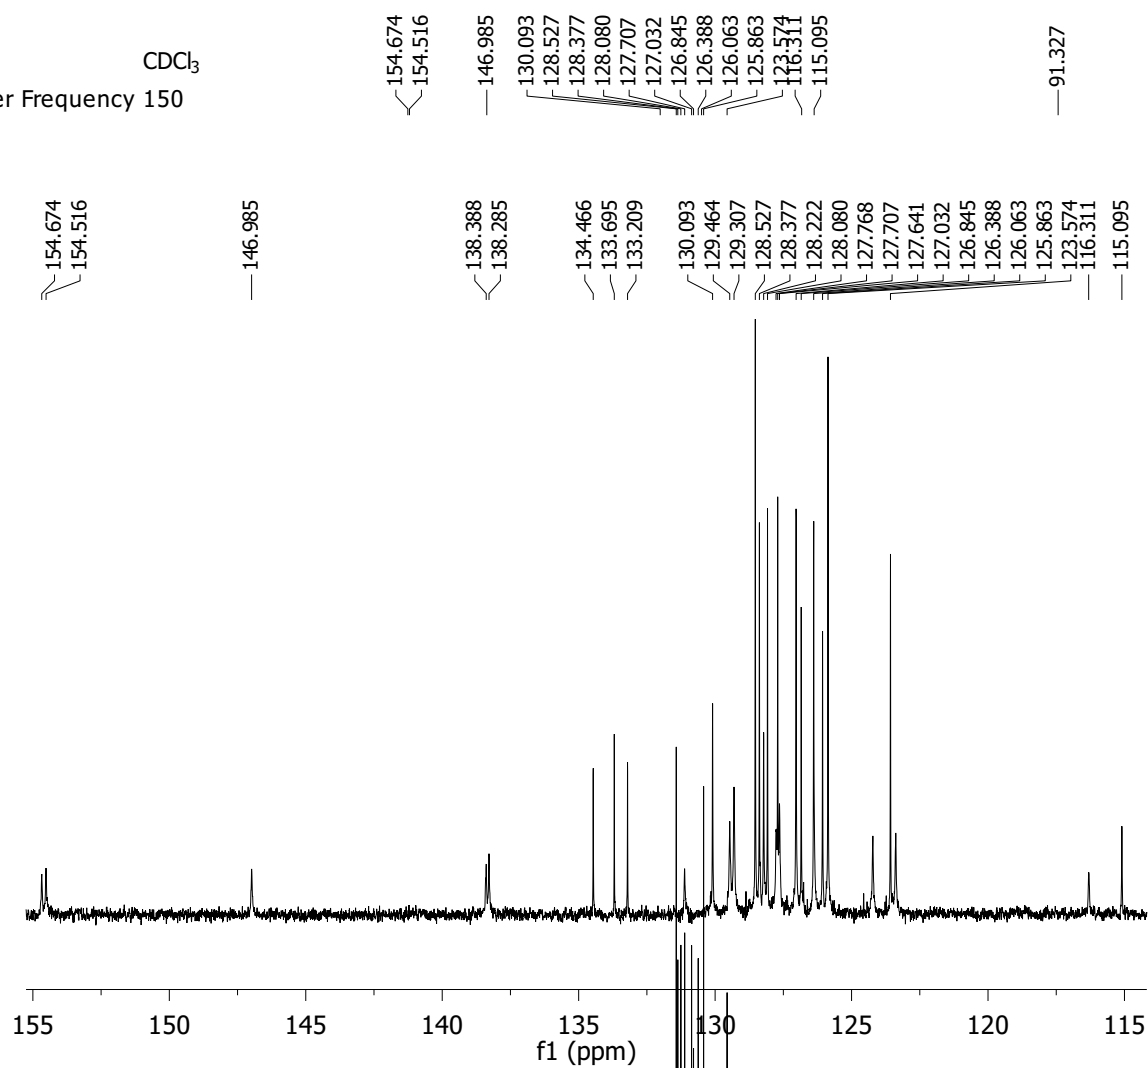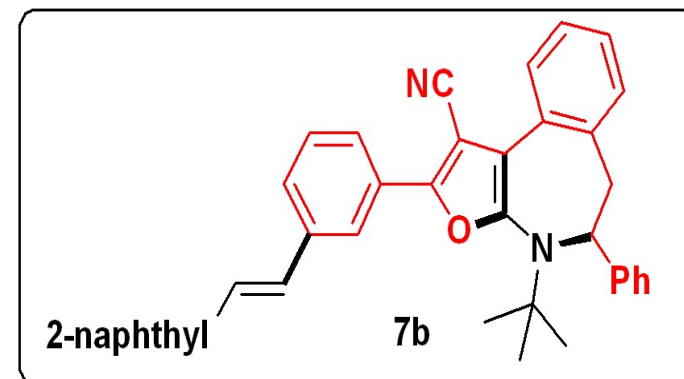

10 200 190 180 170 160 150 140 130 120 110 100 90 80 70 60 50 40 30 20 10 0  
f1 (ppm)

S106

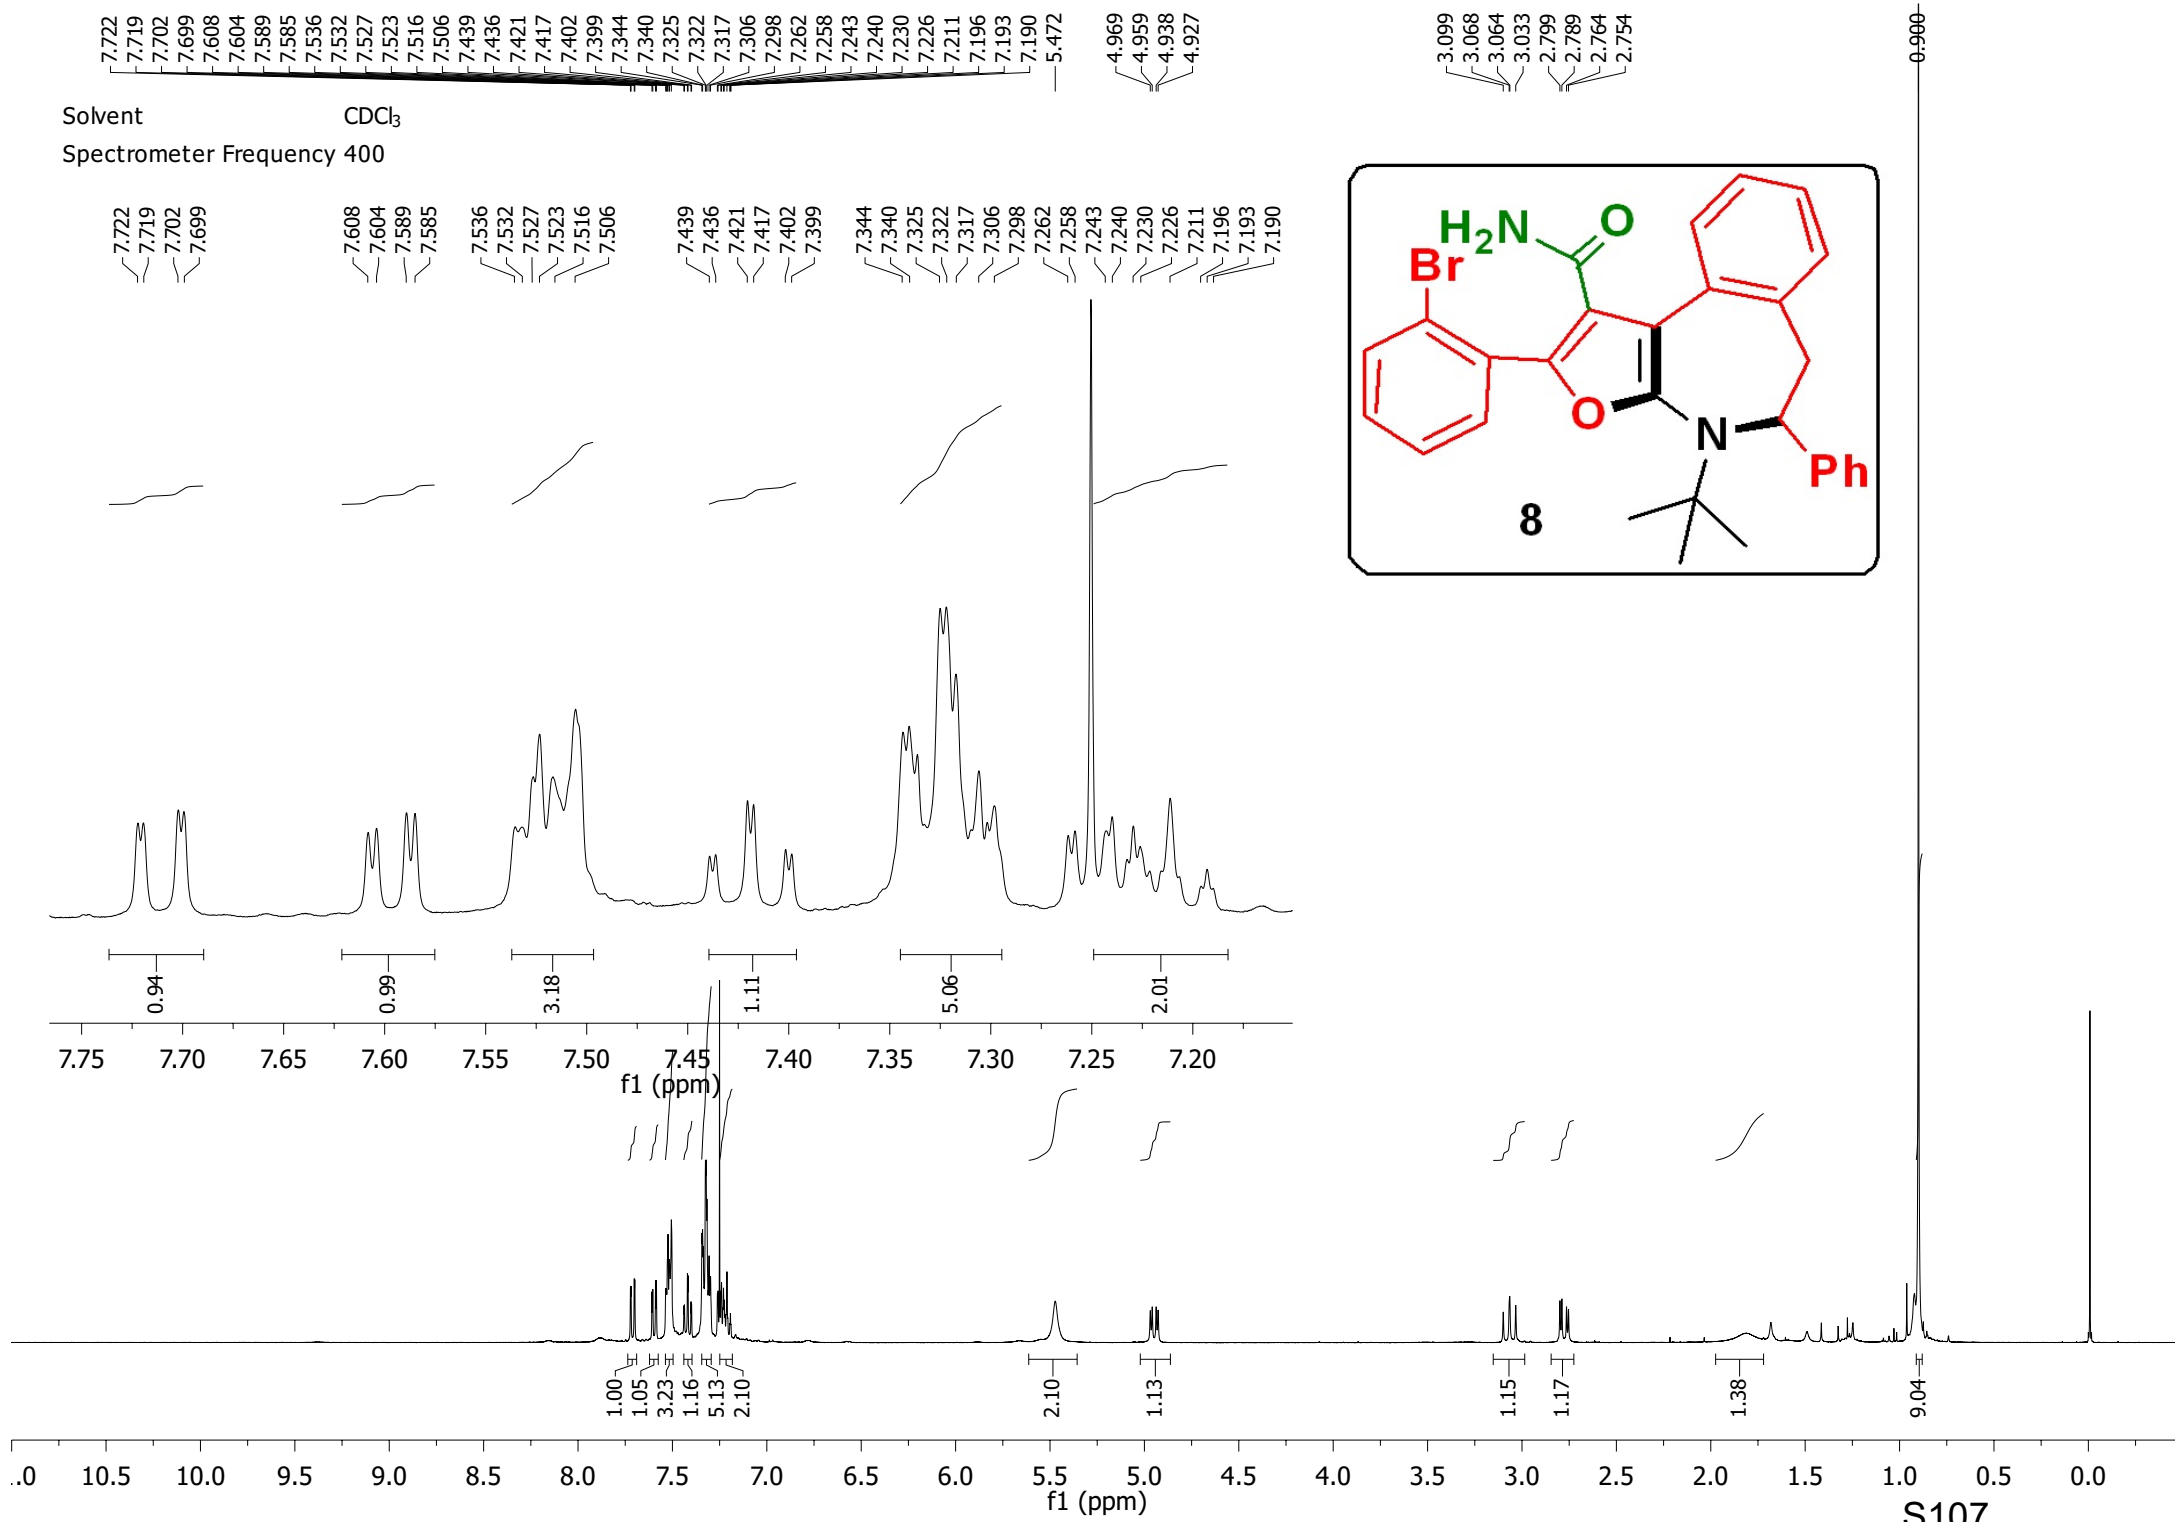

Solvent  $\text{CDCl}_3$   
Spectrometer Frequency 100

160.433  
156.654  
152.762  
147.197  
138.641  
136.185  
131.977  
130.033  
128.835  
128.628  
128.457  
127.173  
126.711  
125.940  
122.645  
120.635  
116.157  
113.643  
112.427

77.311  
76.993  
76.676  
71.705

58.900

44.520

29.023

22.325

14.048

138.641  
136.185  
131.977  
130.033  
128.835  
128.628  
128.457  
127.173  
126.711  
125.940  
122.645  
120.635  
116.157  
113.643  
112.427

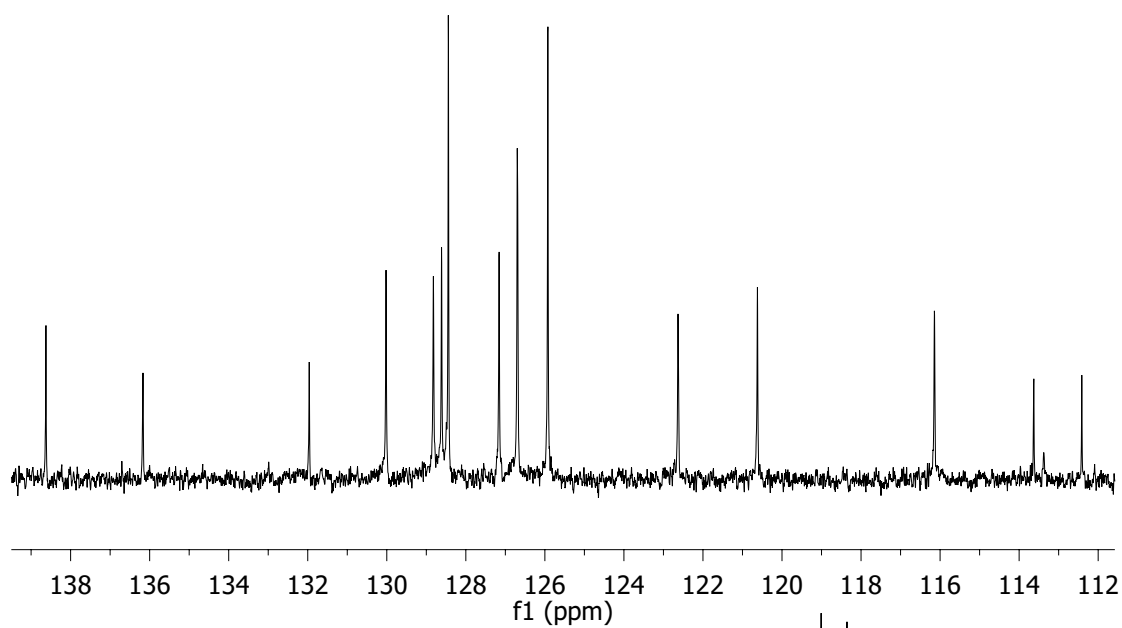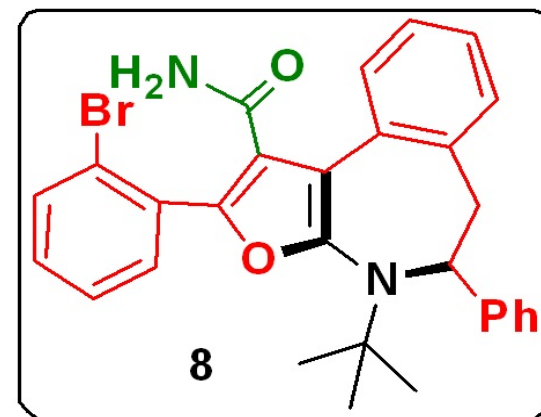

210 200 190 180 170 160 150 140 130 120 110 100 90 80 70 60 50 40 30 20 10 0

S108



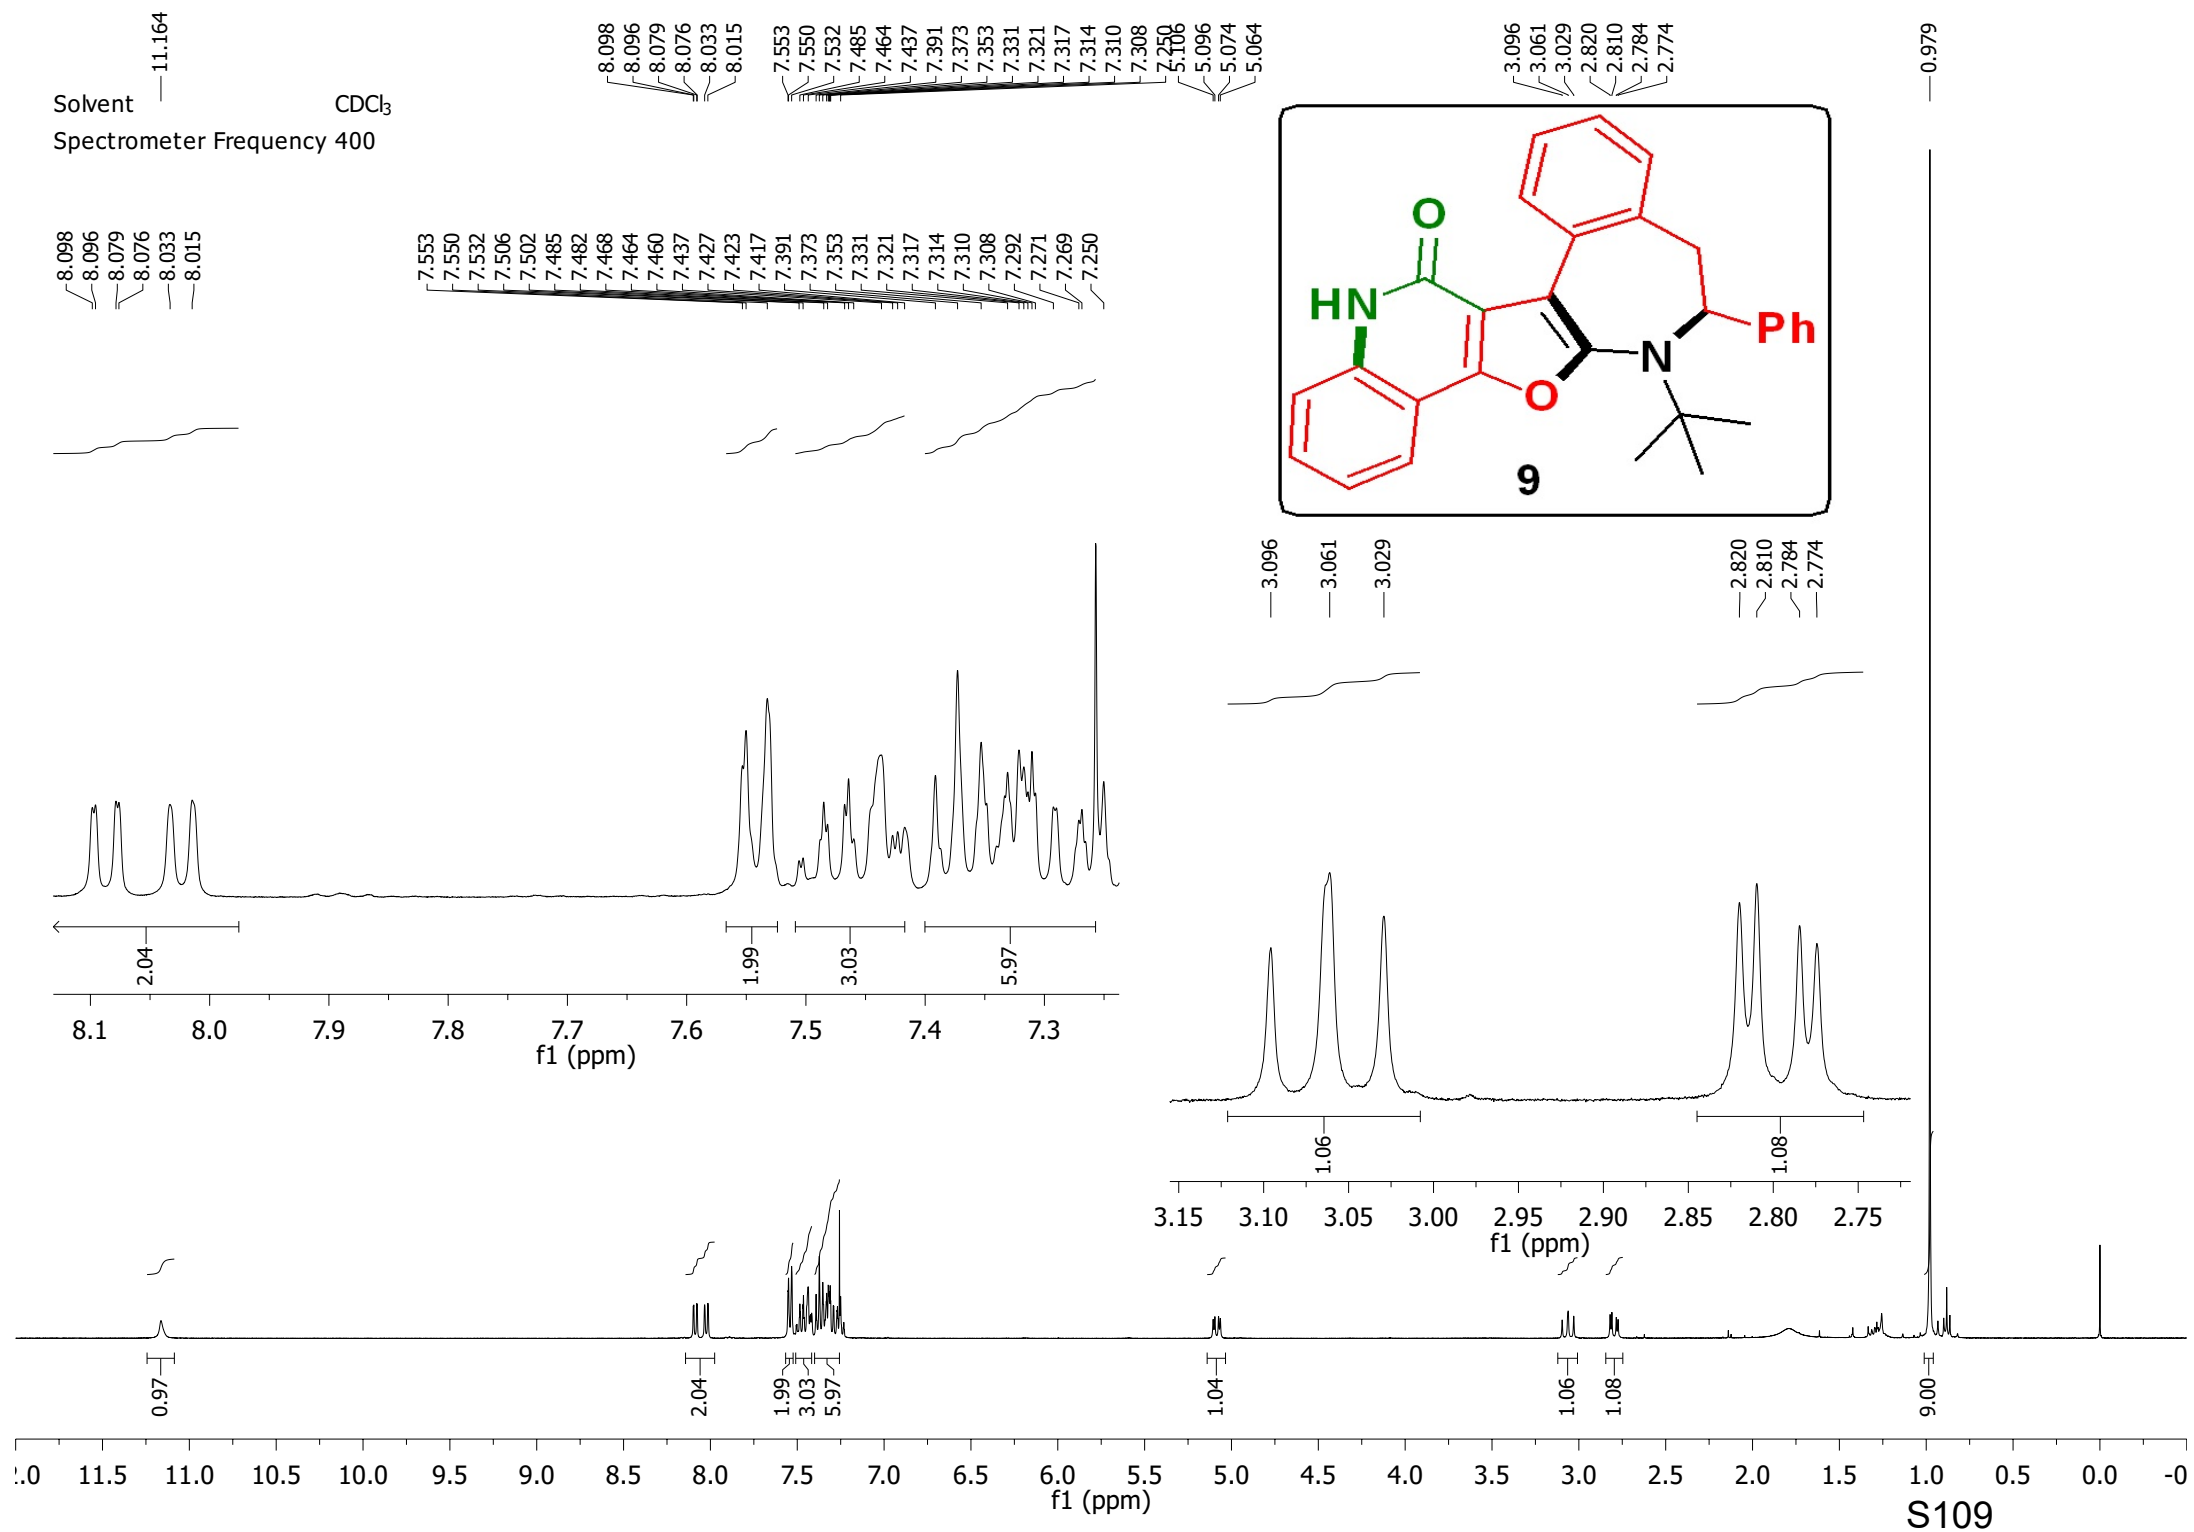

Solvent  $\text{CDCl}_3$   
Spectrometer Frequency 100

160.422  
156.644  
152.754  
147.188  
138.632  
136.176  
131.970  
130.026  
128.828  
128.621  
128.449  
127.165  
126.705  
125.932  
122.638  
120.629  
116.150  
113.637  
112.422

77.317  
77.000  
76.683  
71.704  
58.900  
44.520  
29.026  
22.328  
14.053

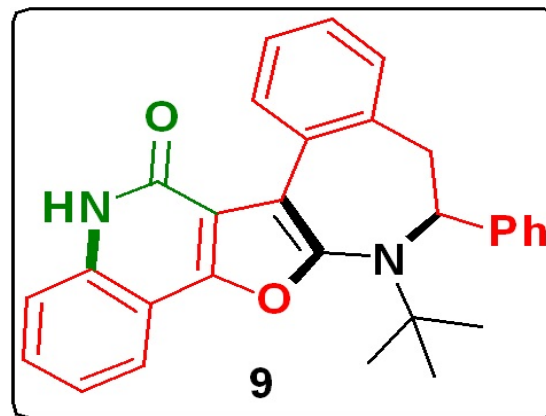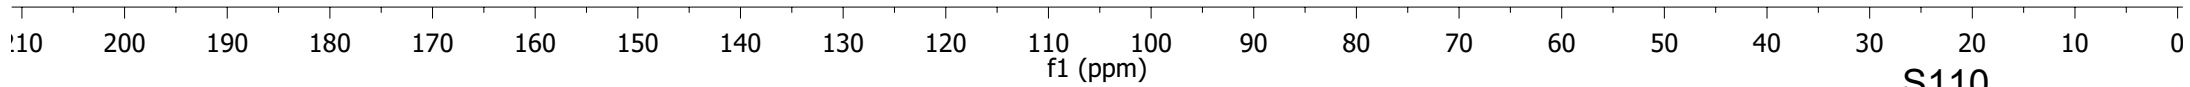

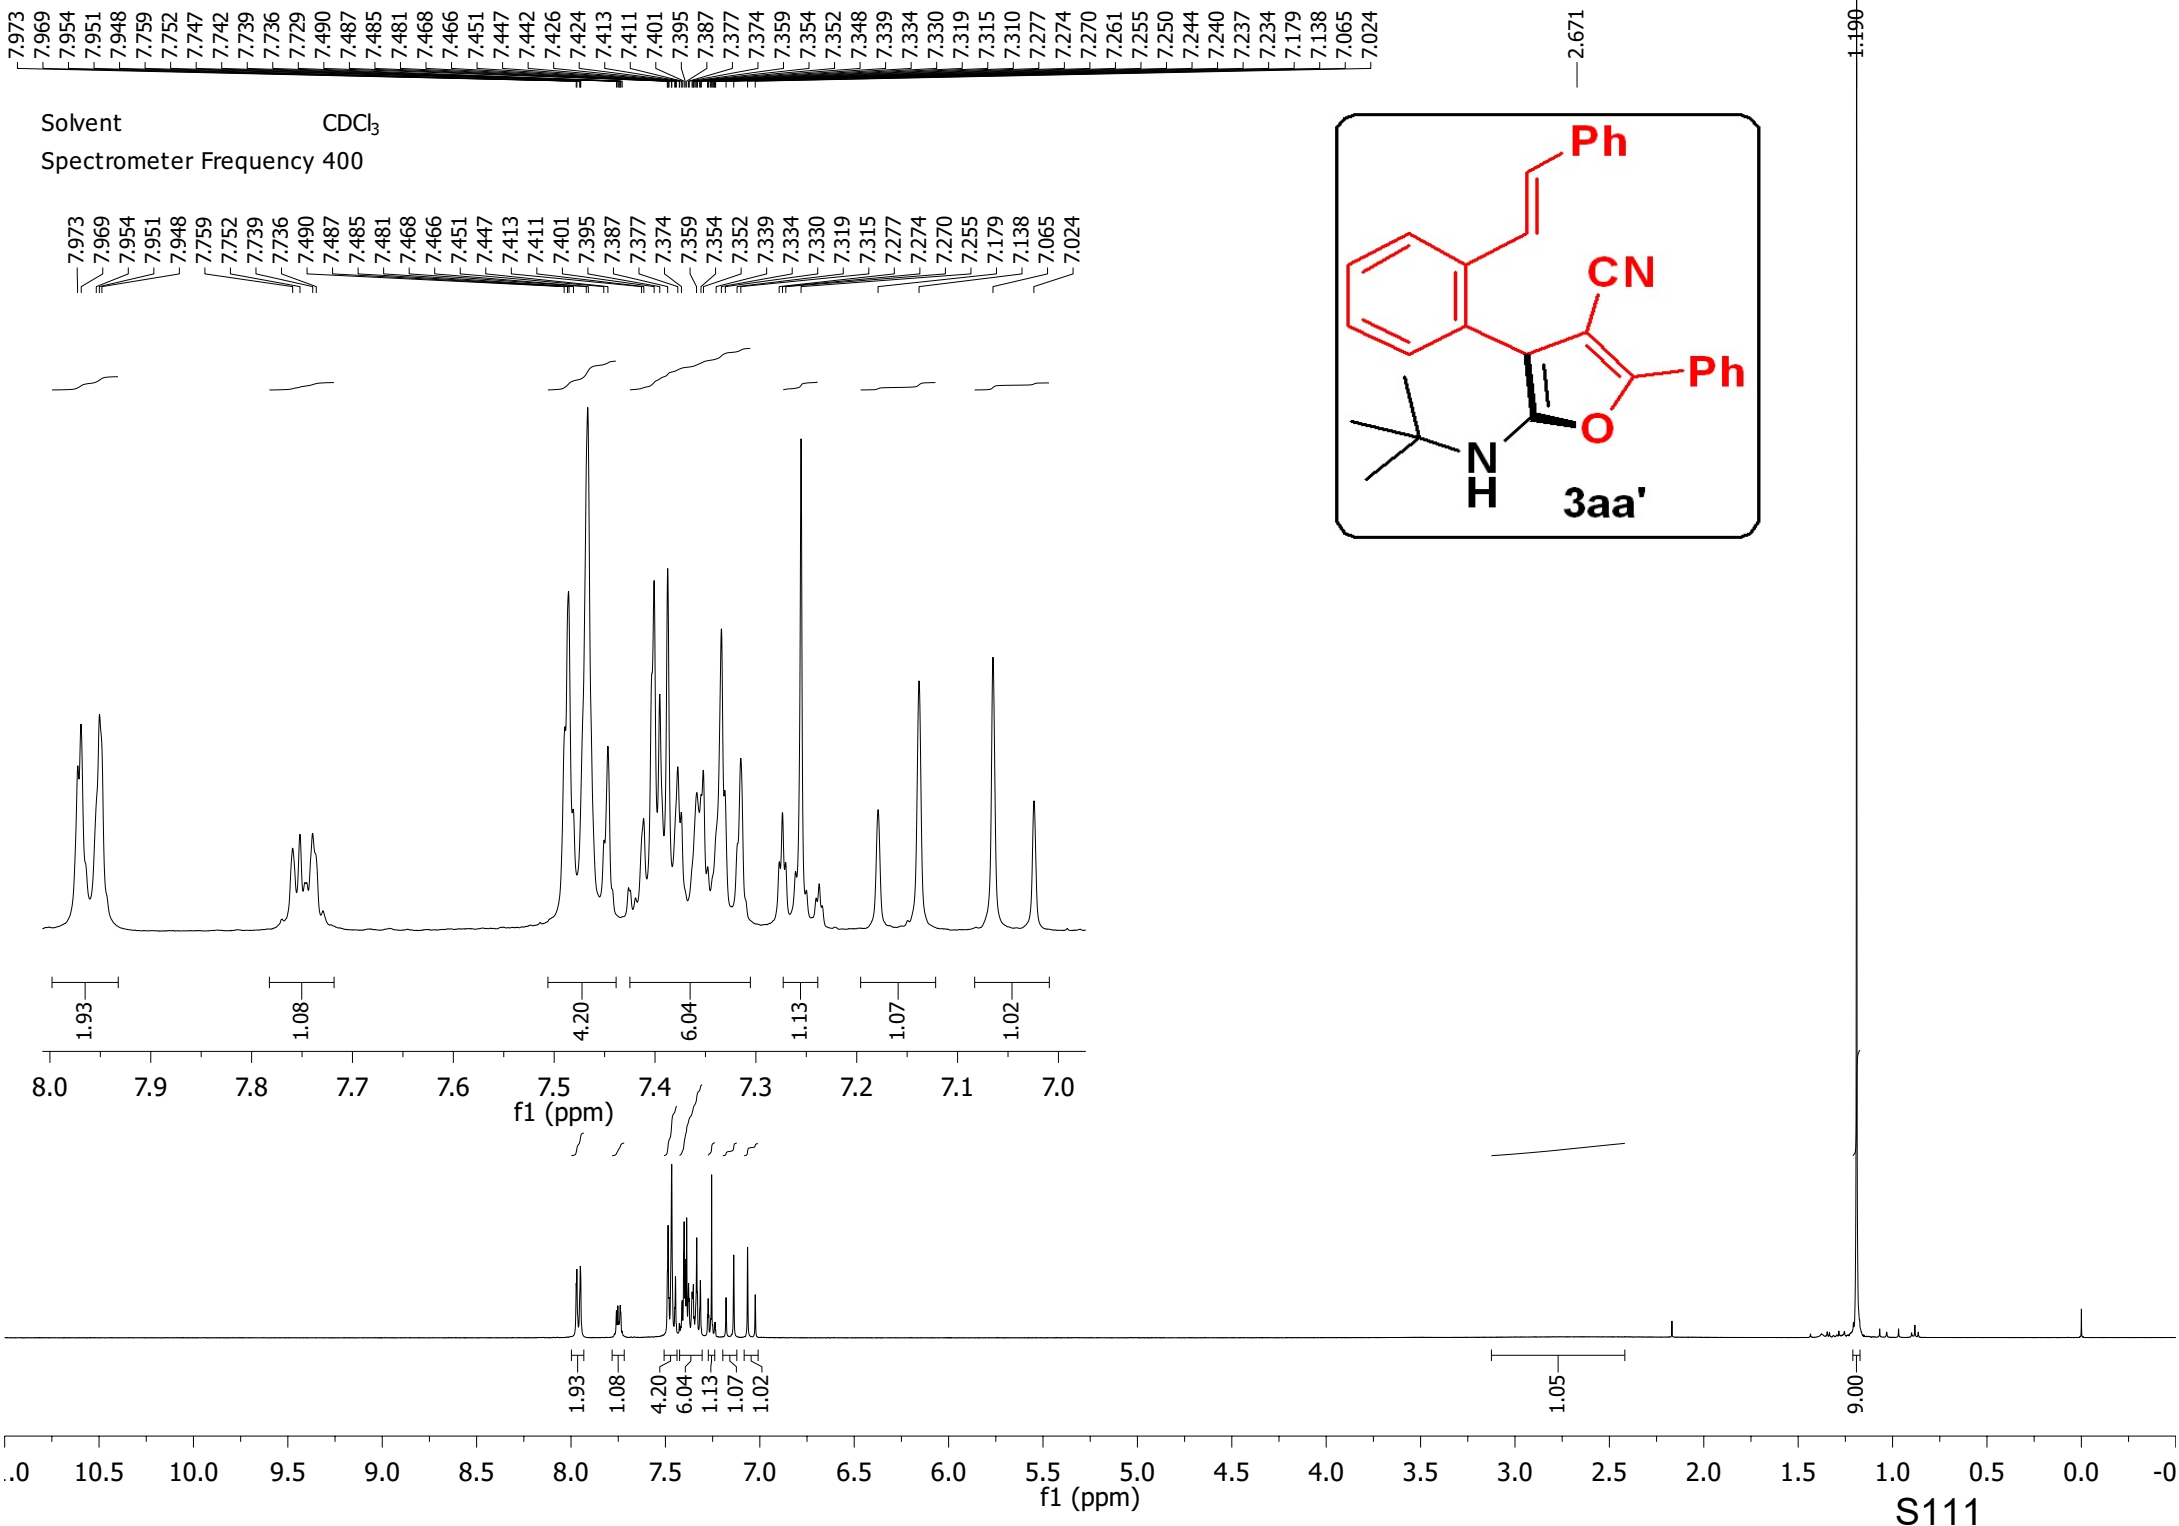

Solvent  $\text{CDCl}_3$   
Spectrometer Frequency 100

137.174  
136.002

152.445  
151.864

137.174  
136.002

131.004  
129.017  
128.976  
128.691  
128.590  
128.207  
128.080  
127.960  
127.078  
126.660  
124.204

124.204

102.711  
94.375

77.317  
77.000  
76.683

53.268

29.981

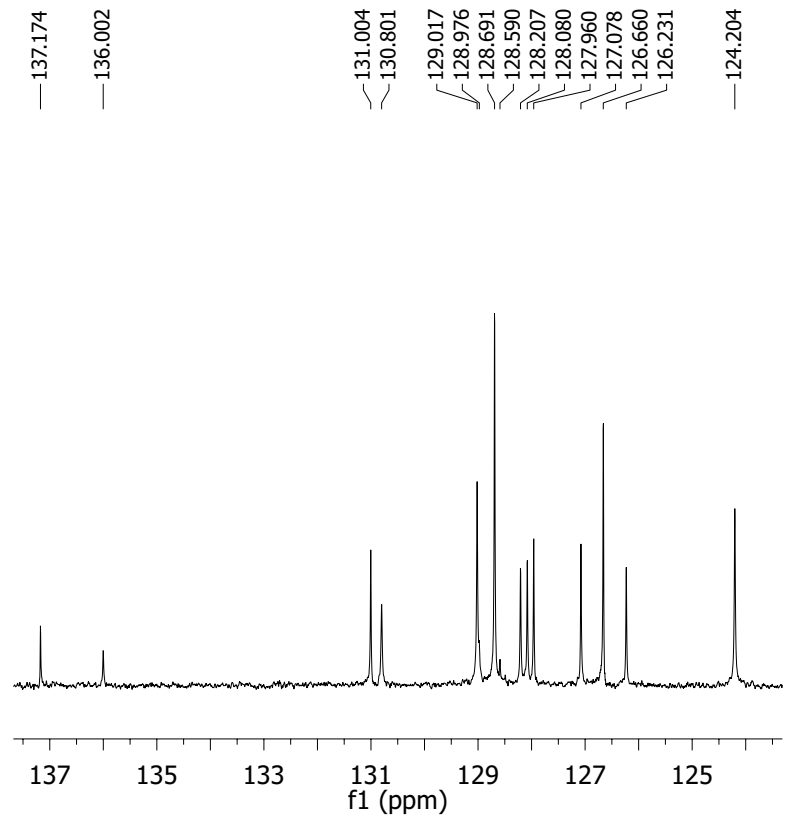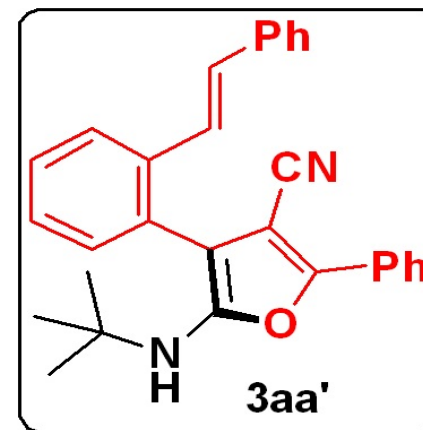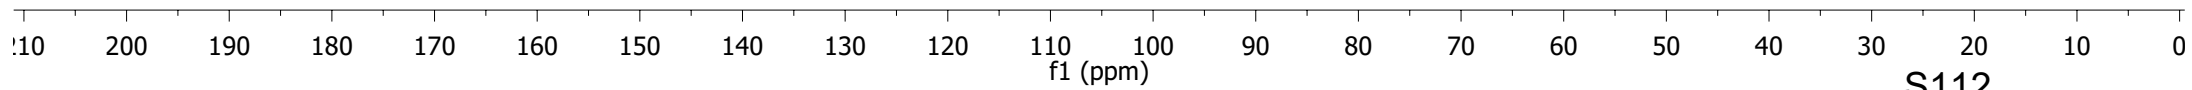

S112

Solvent  $\text{CDCl}_3$   
Spectrometer Frequency 400

8.089  
8.070  
7.641  
7.622  
7.544  
7.525  
7.505  
7.481  
7.477  
7.472  
7.463  
7.460  
7.457  
7.452  
7.448  
7.434  
7.414  
7.409  
7.396  
7.392  
7.375  
7.357  
7.337  
7.321  
7.305  
7.291  
7.273  
7.265  
7.262  
7.248  
7.243  
7.238  
7.228  
7.225  
7.222  
5.017  
3.031  
2.996  
2.964  
2.770  
2.761

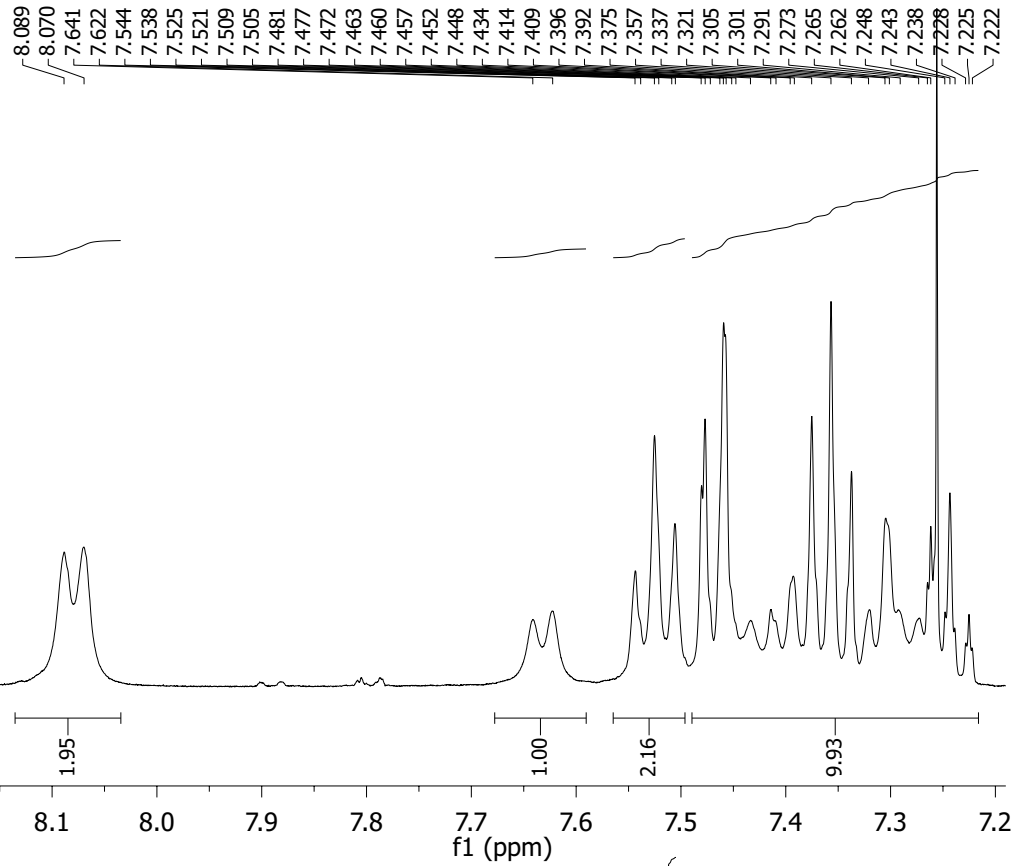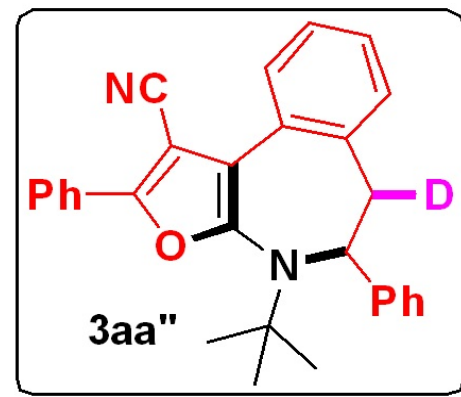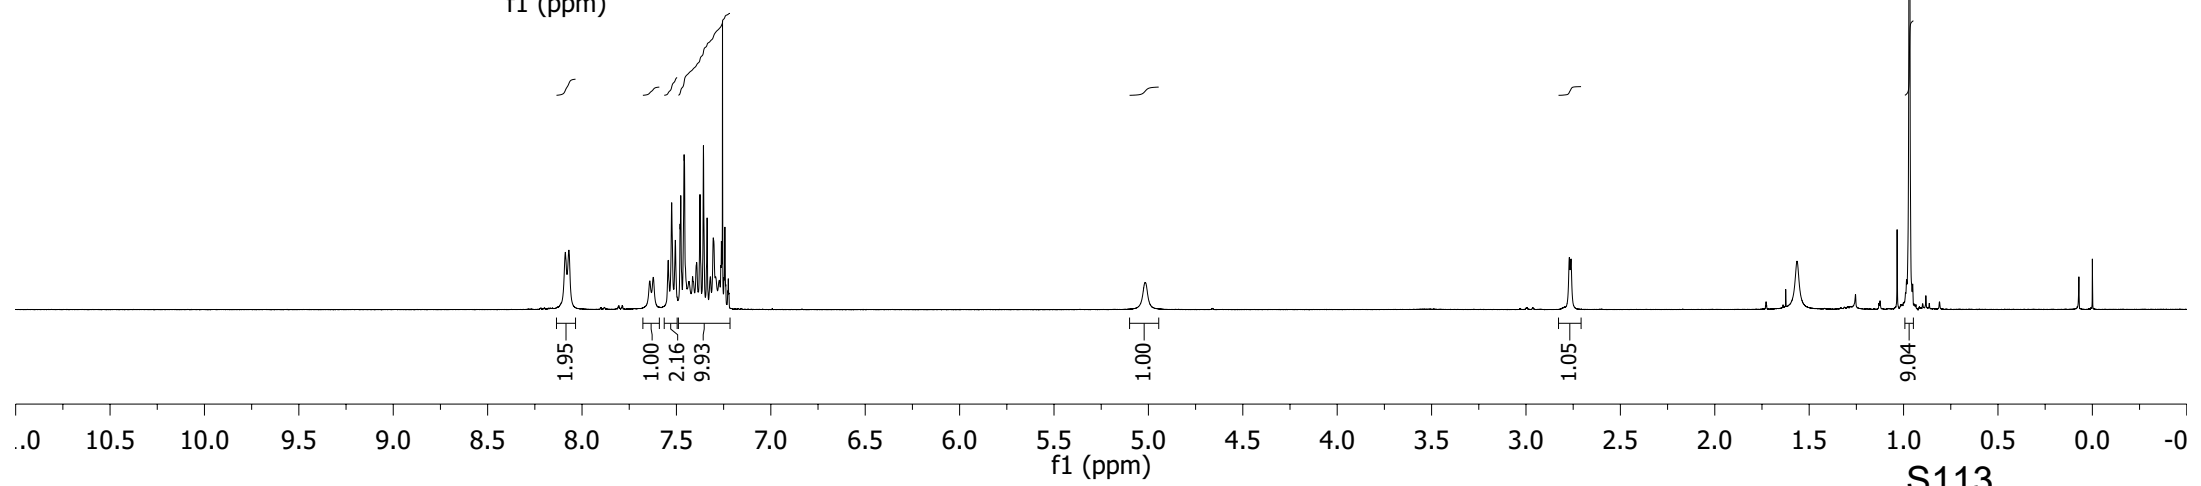

S113

Solvent  $\text{CDCl}_3$   
Spectrometer Frequency 100

154.698  
154.515  
146.955  
138.324  
129.301  
129.045  
128.790  
128.487  
127.701  
127.593  
126.801  
126.320  
125.828  
125.108  
116.161  
115.091

91.008

77.317  
77.000  
76.683

70.969

58.962

44.314  
44.143  
43.947  
43.754

28.939

154.698  
154.515

146.955

138.324

131.126

129.498

129.301

129.045

128.790

128.487

127.701

127.593

126.801

126.320

125.828

125.108

116.161

115.091

155 150 145 140 135 130 125 120 115  
f1 (ppm)

210 200 190 180 170 160 150 140 130 120 110 100 90 80 70 60 50 40 30 20 10 0  
f1 (ppm)

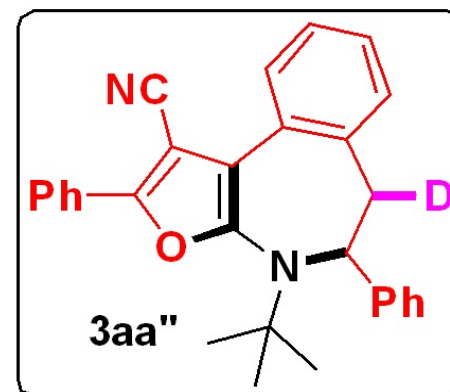

S114

# checkCIF/PLATON report

Structure factors have been supplied for datablock(s) I

THIS REPORT IS FOR GUIDANCE ONLY. IF USED AS PART OF A REVIEW PROCEDURE FOR PUBLICATION, IT SHOULD NOT REPLACE THE EXPERTISE OF AN EXPERIENCED CRYSTALLOGRAPHIC REFEREE.

No syntax errors found.      CIF dictionary      Interpreting this report

## Datablock: I

---

Bond precision:    C-C = 0.0036 A                      Wavelength=0.71073

Cell:                      a=24.6112(4)              b=10.2554(2)              c=36.0411(5)  
                                    alpha=90                      beta=99.385(2)              gamma=90

Temperature:              113 K

|                | Calculated               | Reported        |
|----------------|--------------------------|-----------------|
| Volume         | 8974.9(3)                | 8974.9(3)       |
| Space group    | C 2/c                    | C 1 2/c 1       |
| Hall group     | -C 2yc                   | -C 2yc          |
| Moiety formula | C29 H26 N2 O [+ solvent] | 2(C29 H26 N2 O) |
| Sum formula    | C29 H26 N2 O [+ solvent] | C58 H52 N4 O2   |
| Mr             | 418.52                   | 837.03          |
| Dx,g cm-3      | 1.239                    | 1.239           |
| Z              | 16                       | 8               |
| Mu (mm-1)      | 0.075                    | 0.075           |
| F000           | 3552.0                   | 3552.0          |
| F000'          | 3553.32                  |                 |
| h,k,lmax       | 29,12,42                 | 29,12,42        |
| Nref           | 7906                     | 7887            |
| Tmin,Tmax      | 0.985,0.996              | 0.203,1.000     |
| Tmin'          | 0.985                    |                 |

Correction method= # Reported T Limits: Tmin=0.203 Tmax=1.000  
AbsCorr = MULTI-SCAN

Data completeness= 0.998                      Theta(max)= 24.999

R(reflections)= 0.0689( 6445)              wR2(reflections)= 0.1844( 7887)

S = 1.088                      Npar= 584

---

The following ALERTS were generated. Each ALERT has the format

**test-name\_ALERT\_alert-type\_alert-level.**

Click on the hyperlinks for more details of the test.

---

### ● Alert level C

DIFMX02\_ALERT\_1\_C The maximum difference density is > 0.1\*ZMAX\*0.75  
The relevant atom site should be identified.

|                   |                                                 |       |           |
|-------------------|-------------------------------------------------|-------|-----------|
| PLAT094_ALERT_2_C | Ratio of Maximum / Minimum Residual Density ... | 2.60  | Report    |
| PLAT097_ALERT_2_C | Large Reported Max. (Positive) Residual Density | 0.64  | eA-3      |
| PLAT906_ALERT_3_C | Large K Value in the Analysis of Variance ..... | 5.393 | Check     |
| PLAT911_ALERT_3_C | Missing FCF Refl Between Thmin & STh/L=         | 0.595 | 19 Report |

---

### ● Alert level G

|                   |                                                  |        |        |
|-------------------|--------------------------------------------------|--------|--------|
| PLAT042_ALERT_1_G | Calc. and Reported Moiety Formula Strings Differ | Please | Check  |
| PLAT045_ALERT_1_G | Calculated and Reported Z Differ by a Factor ... | 2.00   | Check  |
| PLAT083_ALERT_2_G | SHELXL Second Parameter in WGHT Unusually Large  | 18.70  | Why ?  |
| PLAT398_ALERT_2_G | Deviating C-O-C Angle From 120 for O1            | 107.6  | Degree |
| PLAT398_ALERT_2_G | Deviating C-O-C Angle From 120 for O2            | 107.3  | Degree |
| PLAT605_ALERT_4_G | Largest Solvent Accessible VOID in the Structure | 0      | A**3   |
| PLAT793_ALERT_4_G | Model has Chirality at C19 (Centro SPGR)         | S      | Verify |
| PLAT793_ALERT_4_G | Model has Chirality at C48 (Centro SPGR)         | R      | Verify |
| PLAT909_ALERT_3_G | Percentage of I>2sig(I) Data at Theta(Max) Still | 61%    | Note   |
| PLAT910_ALERT_3_G | Missing # of FCF Reflection(s) Below Theta(Min). | 1      | Note   |
| PLAT933_ALERT_2_G | Number of OMIT Records in Embedded .res File ... | 19     | Note   |
| PLAT978_ALERT_2_G | Number C-C Bonds with Positive Residual Density. | 0      | Info   |

---

0 **ALERT level A** = Most likely a serious problem - resolve or explain  
0 **ALERT level B** = A potentially serious problem, consider carefully  
5 **ALERT level C** = Check. Ensure it is not caused by an omission or oversight  
12 **ALERT level G** = General information/check it is not something unexpected

3 ALERT type 1 CIF construction/syntax error, inconsistent or missing data  
7 ALERT type 2 Indicator that the structure model may be wrong or deficient  
4 ALERT type 3 Indicator that the structure quality may be low  
3 ALERT type 4 Improvement, methodology, query or suggestion  
0 ALERT type 5 Informative message, check

---

## checkCIF publication errors

---

### ● Alert level A

PUBL004\_ALERT\_1\_A The contact author's name and address are missing,  
\_publ\_contact\_author\_name and \_publ\_contact\_author\_address.

PUBL005\_ALERT\_1\_A \_publ\_contact\_author\_email, \_publ\_contact\_author\_fax and  
\_publ\_contact\_author\_phone are all missing.  
At least one of these should be present.

PUBL006\_ALERT\_1\_A \_publ\_requested\_journal is missing  
e.g. 'Acta Crystallographica Section C'

PUBL008\_ALERT\_1\_A \_publ\_section\_title is missing. Title of paper.

PUBL009\_ALERT\_1\_A \_publ\_author\_name is missing. List of author(s) name(s).

PUBL010\_ALERT\_1\_A \_publ\_author\_address is missing. Author(s) address(es).

PUBL012\_ALERT\_1\_A \_publ\_section\_abstract is missing.  
Abstract of paper in English.

---

7 **ALERT level A** = Data missing that is essential or data in wrong format  
0 **ALERT level G** = General alerts. Data that may be required is missing

---



## Publication of your CIF

You should attempt to resolve as many as possible of the alerts in all categories. Often the minor alerts point to easily fixed oversights, errors and omissions in your CIF or refinement strategy, so attention to these fine details can be worthwhile. In order to resolve some of the more serious problems it may be necessary to carry out additional measurements or structure refinements. However, the nature of your study may justify the reported deviations from journal submission requirements and the more serious of these should be commented upon in the discussion or experimental section of a paper or in the "special\_details" fields of the CIF. *checkCIF* was carefully designed to identify outliers and unusual parameters, but every test has its limitations and alerts that are not important in a particular case may appear. Conversely, the absence of alerts does not guarantee there are no aspects of the results needing attention. It is up to the individual to critically assess their own results and, if necessary, seek expert advice.

If level A alerts remain, which you believe to be justified deviations, and you intend to submit this CIF for publication in a journal, you should additionally insert an explanation in your CIF using the Validation Reply Form (VRF) below. This will allow your explanation to be considered as part of the review process.

## Validation response form

Please find below a validation response form (VRF) that can be filled in and pasted into your CIF.

```
# start Validation Reply Form
_vrf_PUBL004_GLOBAL
;
PROBLEM: The contact author's name and address are missing,
RESPONSE: ...
;
_vrf_PUBL005_GLOBAL
;
PROBLEM: _publ_contact_author_email, _publ_contact_author_fax and
RESPONSE: ...
;
_vrf_PUBL006_GLOBAL
;
PROBLEM: _publ_requested_journal is missing
RESPONSE: ...
;
_vrf_PUBL008_GLOBAL
;
PROBLEM: _publ_section_title is missing. Title of paper.
RESPONSE: ...
;
_vrf_PUBL009_GLOBAL
;
PROBLEM: _publ_author_name is missing. List of author(s) name(s).
RESPONSE: ...
;
_vrf_PUBL010_GLOBAL
;
PROBLEM: _publ_author_address is missing. Author(s) address(es).
RESPONSE: ...
;
_vrf_PUBL012_GLOBAL
;
```

PROBLEM: \_publ\_section\_abstract is missing.  
RESPONSE: ...  
;  
# end Validation Reply Form

If you wish to submit your CIF for publication in Acta Crystallographica Section C or E, you should upload your CIF via the web. If you wish to submit your CIF for publication in IUCrData you should upload your CIF via the web. If your CIF is to form part of a submission to another IUCr journal, you will be asked, either during electronic submission or by the Co-editor handling your paper, to upload your CIF via our web site.

---

**PLATON version of 13/07/2021; check.def file version of 13/07/2021**

Datablock I - ellipsoid plot

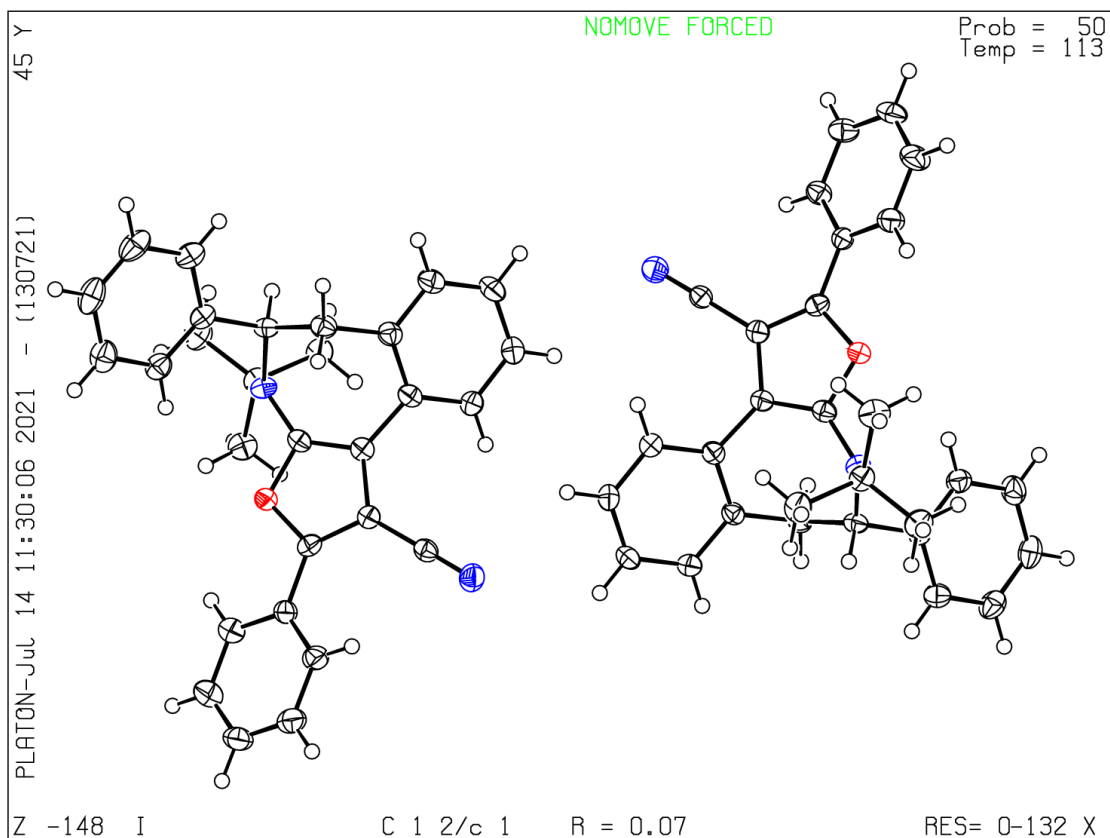

# checkCIF/PLATON report

Structure factors have been supplied for datablock(s) I

THIS REPORT IS FOR GUIDANCE ONLY. IF USED AS PART OF A REVIEW PROCEDURE FOR PUBLICATION, IT SHOULD NOT REPLACE THE EXPERTISE OF AN EXPERIENCED CRYSTALLOGRAPHIC REFEREE.

No syntax errors found.      CIF dictionary      Interpreting this report

## Datablock: I

---

Bond precision:    C-C = 0.0030 A                      Wavelength=0.71073

Cell:                      a=10.2545(3)              b=11.7840(4)              c=18.9397(6)  
                                    alpha=90                      beta=91.018(3)              gamma=90

Temperature:              113 K

|                | Calculated    | Reported      |
|----------------|---------------|---------------|
| Volume         | 2288.29(13)   | 2288.29(13)   |
| Space group    | P 21/n        | P 1 21/n 1    |
| Hall group     | -P 2yn        | -P 2yn        |
| Moiety formula | C30 H26 N2 O3 | C30 H26 N2 O3 |
| Sum formula    | C30 H26 N2 O3 | C30 H26 N2 O3 |
| Mr             | 462.53        | 462.53        |
| Dx,g cm-3      | 1.343         | 1.343         |
| Z              | 4             | 4             |
| Mu (mm-1)      | 0.087         | 0.087         |
| F000           | 976.0         | 976.0         |
| F000'          | 976.42        |               |
| h,k,lmax       | 13,15,24      | 13,15,24      |
| Nref           | 5030          | 4785          |
| Tmin,Tmax      | 0.979,0.991   | 0.712,1.000   |
| Tmin'          | 0.978         |               |

Correction method= # Reported T Limits: Tmin=0.712 Tmax=1.000  
AbsCorr = MULTI-SCAN

Data completeness= 0.951                      Theta(max)= 27.078

R(reflections)= 0.0523( 3902)              wR2(reflections)= 0.1457( 4785)

S = 1.054                      Npar= 319

---

The following ALERTS were generated. Each ALERT has the format

**test-name\_ALERT\_alert-type\_alert-level.**

Click on the hyperlinks for more details of the test.

---

### ● Alert level C

DIFMX02\_ALERT\_1\_C The maximum difference density is > 0.1\*ZMAX\*0.75  
The relevant atom site should be identified.

|                   |                                                 |       |        |
|-------------------|-------------------------------------------------|-------|--------|
| PLAT094_ALERT_2_C | Ratio of Maximum / Minimum Residual Density ... | 2.27  | Report |
| PLAT097_ALERT_2_C | Large Reported Max. (Positive) Residual Density | 0.62  | eA-3   |
| PLAT906_ALERT_3_C | Large K Value in the Analysis of Variance ..... | 2.908 | Check  |

---

### ● Alert level G

|                   |                                                  |                       |       |          |
|-------------------|--------------------------------------------------|-----------------------|-------|----------|
| PLAT398_ALERT_2_G | Deviating C-O-C                                  | Angle From 120 for O1 | 107.7 | Degree   |
| PLAT398_ALERT_2_G | Deviating C-O-C                                  | Angle From 120 for O2 | 104.8 | Degree   |
| PLAT398_ALERT_2_G | Deviating C-O-C                                  | Angle From 120 for O3 | 105.7 | Degree   |
| PLAT793_ALERT_4_G | Model has Chirality at C11                       | (Centro SPGR)         |       | R Verify |
| PLAT912_ALERT_4_G | Missing # of FCF Reflections Above STh/L=        | 0.600                 | 243   | Note     |
| PLAT978_ALERT_2_G | Number C-C Bonds with Positive Residual Density. |                       | 6     | Info     |

---

- 0 **ALERT level A** = Most likely a serious problem - resolve or explain  
0 **ALERT level B** = A potentially serious problem, consider carefully  
4 **ALERT level C** = Check. Ensure it is not caused by an omission or oversight  
6 **ALERT level G** = General information/check it is not something unexpected
- 1 ALERT type 1 CIF construction/syntax error, inconsistent or missing data  
6 ALERT type 2 Indicator that the structure model may be wrong or deficient  
1 ALERT type 3 Indicator that the structure quality may be low  
2 ALERT type 4 Improvement, methodology, query or suggestion  
0 ALERT type 5 Informative message, check
- 

## checkCIF publication errors

---

### ● Alert level A

PUBL004\_ALERT\_1\_A The contact author's name and address are missing,  
\_publ\_contact\_author\_name and \_publ\_contact\_author\_address.

PUBL005\_ALERT\_1\_A \_publ\_contact\_author\_email, \_publ\_contact\_author\_fax and  
\_publ\_contact\_author\_phone are all missing.  
At least one of these should be present.

PUBL006\_ALERT\_1\_A \_publ\_requested\_journal is missing  
e.g. 'Acta Crystallographica Section C'

PUBL008\_ALERT\_1\_A \_publ\_section\_title is missing. Title of paper.

PUBL009\_ALERT\_1\_A \_publ\_author\_name is missing. List of author(s) name(s).

PUBL010\_ALERT\_1\_A \_publ\_author\_address is missing. Author(s) address(es).

PUBL012\_ALERT\_1\_A \_publ\_section\_abstract is missing.  
Abstract of paper in English.

---

- 7 **ALERT level A** = Data missing that is essential or data in wrong format  
0 **ALERT level G** = General alerts. Data that may be required is missing
-

## Publication of your CIF

You should attempt to resolve as many as possible of the alerts in all categories. Often the minor alerts point to easily fixed oversights, errors and omissions in your CIF or refinement strategy, so attention to these fine details can be worthwhile. In order to resolve some of the more serious problems it may be necessary to carry out additional measurements or structure refinements. However, the nature of your study may justify the reported deviations from journal submission requirements and the more serious of these should be commented upon in the discussion or experimental section of a paper or in the "special\_details" fields of the CIF. *checkCIF* was carefully designed to identify outliers and unusual parameters, but every test has its limitations and alerts that are not important in a particular case may appear. Conversely, the absence of alerts does not guarantee there are no aspects of the results needing attention. It is up to the individual to critically assess their own results and, if necessary, seek expert advice.

If level A alerts remain, which you believe to be justified deviations, and you intend to submit this CIF for publication in a journal, you should additionally insert an explanation in your CIF using the Validation Reply Form (VRF) below. This will allow your explanation to be considered as part of the review process.

## Validation response form

Please find below a validation response form (VRF) that can be filled in and pasted into your CIF.

```
# start Validation Reply Form
_vrf_PUBL004_GLOBAL
;
PROBLEM: The contact author's name and address are missing,
RESPONSE: ...
;
_vrf_PUBL005_GLOBAL
;
PROBLEM: _publ_contact_author_email, _publ_contact_author_fax and
RESPONSE: ...
;
_vrf_PUBL006_GLOBAL
;
PROBLEM: _publ_requested_journal is missing
RESPONSE: ...
;
_vrf_PUBL008_GLOBAL
;
PROBLEM: _publ_section_title is missing. Title of paper.
RESPONSE: ...
;
_vrf_PUBL009_GLOBAL
;
PROBLEM: _publ_author_name is missing. List of author(s) name(s).
RESPONSE: ...
;
_vrf_PUBL010_GLOBAL
;
PROBLEM: _publ_author_address is missing. Author(s) address(es).
RESPONSE: ...
;
_vrf_PUBL012_GLOBAL
;
```

PROBLEM: \_publ\_section\_abstract is missing.  
RESPONSE: ...  
;  
# end Validation Reply Form

If you wish to submit your CIF for publication in Acta Crystallographica Section C or E, you should upload your CIF via the web. If you wish to submit your CIF for publication in IUCrData you should upload your CIF via the web. If your CIF is to form part of a submission to another IUCr journal, you will be asked, either during electronic submission or by the Co-editor handling your paper, to upload your CIF via our web site.

---

**PLATON version of 22/03/2021; check.def file version of 19/03/2021**

Datablock I - ellipsoid plot

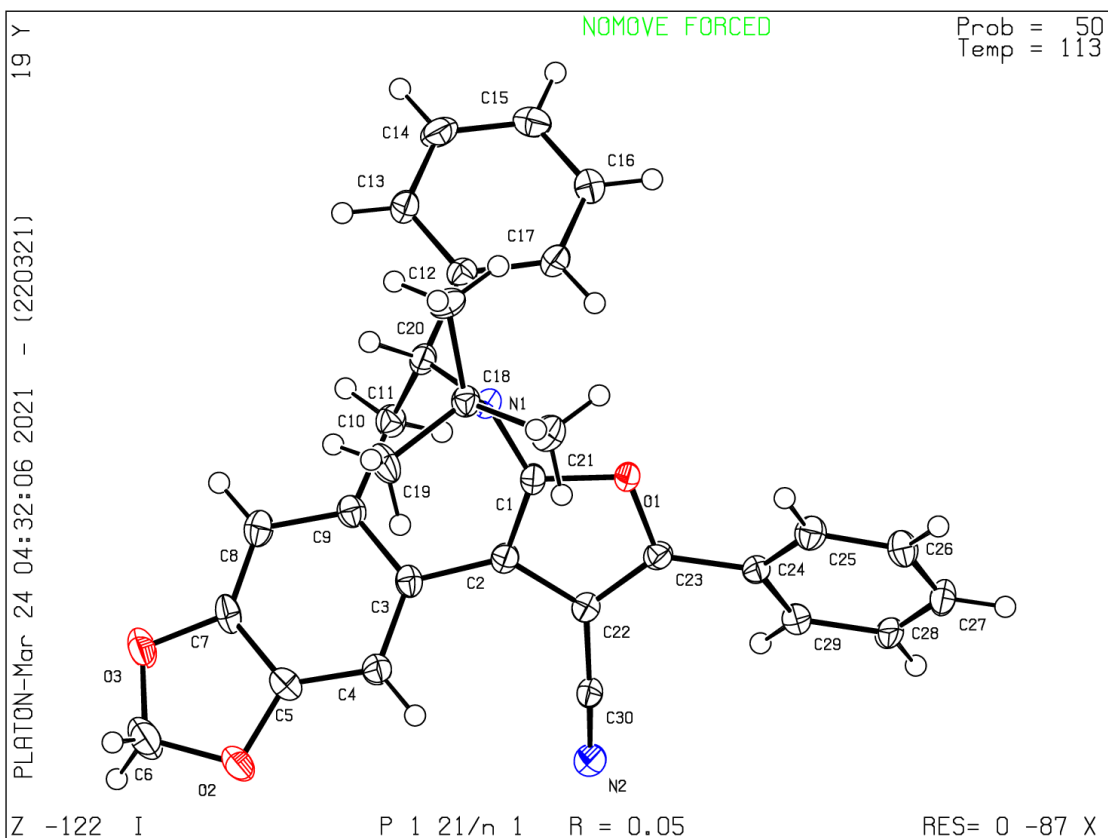

## checkCIF/PLATON report

You have not supplied any structure factors. As a result the full set of tests cannot be run.

THIS REPORT IS FOR GUIDANCE ONLY. IF USED AS PART OF A REVIEW PROCEDURE FOR PUBLICATION, IT SHOULD NOT REPLACE THE EXPERTISE OF AN EXPERIENCED CRYSTALLOGRAPHIC REFEREE.

No syntax errors found.     CIF dictionary     Interpreting this report

### Datablock: I

---

Bond precision:     C-C = 0.0019 A                      Wavelength=0.71073  
Cell:                      a=16.0365 (3)              b=8.1410 (2)              c=19.0830 (5)  
                                alpha=90                      beta=93.993 (2)              gamma=90  
Temperature:              113 K

|                        | Calculated   | Reported     |
|------------------------|--------------|--------------|
| Volume                 | 2485.30 (10) | 2485.30 (10) |
| Space group            | P 21/c       | P 1 21/c 1   |
| Hall group             | -P 2ybc      | -P 2ybc      |
| Moiety formula         | C33 H28 N2 O | C33 H28 N2 O |
| Sum formula            | C33 H28 N2 O | C33 H28 N2 O |
| Mr                     | 468.57       | 468.57       |
| Dx, g cm <sup>-3</sup> | 1.252        | 1.252        |
| Z                      | 4            | 4            |
| Mu (mm <sup>-1</sup> ) | 0.075        | 0.075        |
| F000                   | 992.0        | 992.0        |
| F000'                  | 992.37       |              |
| h, k, lmax             | 19, 9, 22    | 19, 9, 22    |
| Nref                   | 4378         | 4377         |
| Tmin, Tmax             | 0.978, 0.989 | 0.397, 1.000 |
| Tmin'                  | 0.978        |              |

Correction method= # Reported T Limits: Tmin=0.397 Tmax=1.000  
AbsCorr = MULTI-SCAN

Data completeness= 1.000                      Theta (max)= 24.994

R(reflections)= 0.0392 ( 3919)                      wR2(reflections)=  
S = 1.069                      Npar= 328                      0.1049 ( 4377)

---

The following ALERTS were generated. Each ALERT has the format

**test-name\_ALERT\_alert-type\_alert-level.**

Click on the hyperlinks for more details of the test.

---

### Alert level G

|                   |                                                  |       |             |
|-------------------|--------------------------------------------------|-------|-------------|
| PLAT003_ALERT_2_G | Number of Uiso or Uij Restrained non-H Atoms ... | 36    | Report      |
| PLAT005_ALERT_5_G | No Embedded Refinement Details Found in the CIF  |       | Please Do ! |
| PLAT230_ALERT_2_G | Hirshfeld Test Diff for C25 --C33 .              | 6.1   | s.u.        |
| PLAT398_ALERT_2_G | Deviating C-O-C Angle From 120 for O1            | 107.4 | Degree      |
| PLAT793_ALERT_4_G | Model has Chirality at C10 (Centro SPGR)         |       | S Verify    |
| PLAT860_ALERT_3_G | Number of Least-Squares Restraints .....         | 1056  | Note        |

---

0 **ALERT level A** = Most likely a serious problem - resolve or explain  
0 **ALERT level B** = A potentially serious problem, consider carefully  
0 **ALERT level C** = Check. Ensure it is not caused by an omission or oversight  
6 **ALERT level G** = General information/check it is not something unexpected

0 ALERT type 1 CIF construction/syntax error, inconsistent or missing data  
3 ALERT type 2 Indicator that the structure model may be wrong or deficient  
1 ALERT type 3 Indicator that the structure quality may be low  
1 ALERT type 4 Improvement, methodology, query or suggestion  
1 ALERT type 5 Informative message, check

---

## checkCIF publication errors

---

### Alert level A

PUBL004\_ALERT\_1\_A The contact author's name and address are missing,  
\_publ\_contact\_author\_name and \_publ\_contact\_author\_address.  
PUBL005\_ALERT\_1\_A \_publ\_contact\_author\_email, \_publ\_contact\_author\_fax and  
\_publ\_contact\_author\_phone are all missing.  
At least one of these should be present.  
PUBL006\_ALERT\_1\_A \_publ\_requested\_journal is missing  
e.g. 'Acta Crystallographica Section C'  
PUBL008\_ALERT\_1\_A \_publ\_section\_title is missing. Title of paper.  
PUBL009\_ALERT\_1\_A \_publ\_author\_name is missing. List of author(s) name(s).  
PUBL010\_ALERT\_1\_A \_publ\_author\_address is missing. Author(s) address(es).  
PUBL012\_ALERT\_1\_A \_publ\_section\_abstract is missing.  
Abstract of paper in English.

---

7 **ALERT level A** = Data missing that is essential or data in wrong format  
0 **ALERT level G** = General alerts. Data that may be required is missing

---



## Publication of your CIF

You should attempt to resolve as many as possible of the alerts in all categories. Often the minor alerts point to easily fixed oversights, errors and omissions in your CIF or refinement strategy, so attention to these fine details can be worthwhile. In order to resolve some of the more serious problems it may be necessary to carry out additional measurements or structure refinements. However, the nature of your study may justify the reported deviations from journal submission requirements and the more serious of these should be commented upon in the discussion or experimental section of a paper or in the "special\_details" fields of the CIF. *checkCIF* was carefully designed to identify outliers and unusual parameters, but every test has its limitations and alerts that are not important in a particular case may appear. Conversely, the absence of alerts does not guarantee there are no aspects of the results needing attention. It is up to the individual to critically assess their own results and, if necessary, seek expert advice.

If level A alerts remain, which you believe to be justified deviations, and you intend to submit this CIF for publication in a journal, you should additionally insert an explanation in your CIF using the Validation Reply Form (VRF) below. This will allow your explanation to be considered as part of the review process.

## Validation response form

Please find below a validation response form (VRF) that can be filled in and pasted into your CIF.

```
# start Validation Reply Form
_vrf_PUBL004_GLOBAL
;
PROBLEM: The contact author's name and address are missing,
RESPONSE: ...
;
_vrf_PUBL005_GLOBAL
;
PROBLEM: _publ_contact_author_email, _publ_contact_author_fax and
RESPONSE: ...
;
_vrf_PUBL006_GLOBAL
;
PROBLEM: _publ_requested_journal is missing
RESPONSE: ...
;
_vrf_PUBL008_GLOBAL
;
PROBLEM: _publ_section_title is missing. Title of paper.
RESPONSE: ...
;
_vrf_PUBL009_GLOBAL
;
PROBLEM: _publ_author_name is missing. List of author(s) name(s).
RESPONSE: ...
;
_vrf_PUBL010_GLOBAL
;
PROBLEM: _publ_author_address is missing. Author(s) address(es).
```

```

RESPONSE: ...
;
_vrf_PUBL012_GLOBAL
;
PROBLEM: _publ_section_abstract is missing.
RESPONSE: ...
;
# end Validation Reply Form

```

If you wish to submit your CIF for publication in Acta Crystallographica Section C or E, you should upload your CIF via the web. If you wish to submit your CIF for publication in IUCrData you should upload your CIF via the web. If your CIF is to form part of a submission to another IUCr journal, you will be asked, either during electronic submission or by the Co-editor handling your paper, to upload your CIF via our web site.

**PLATON version of 18/12/2021; check.def file version of 18/12/2021**

Datablock I - ellipsoid plot

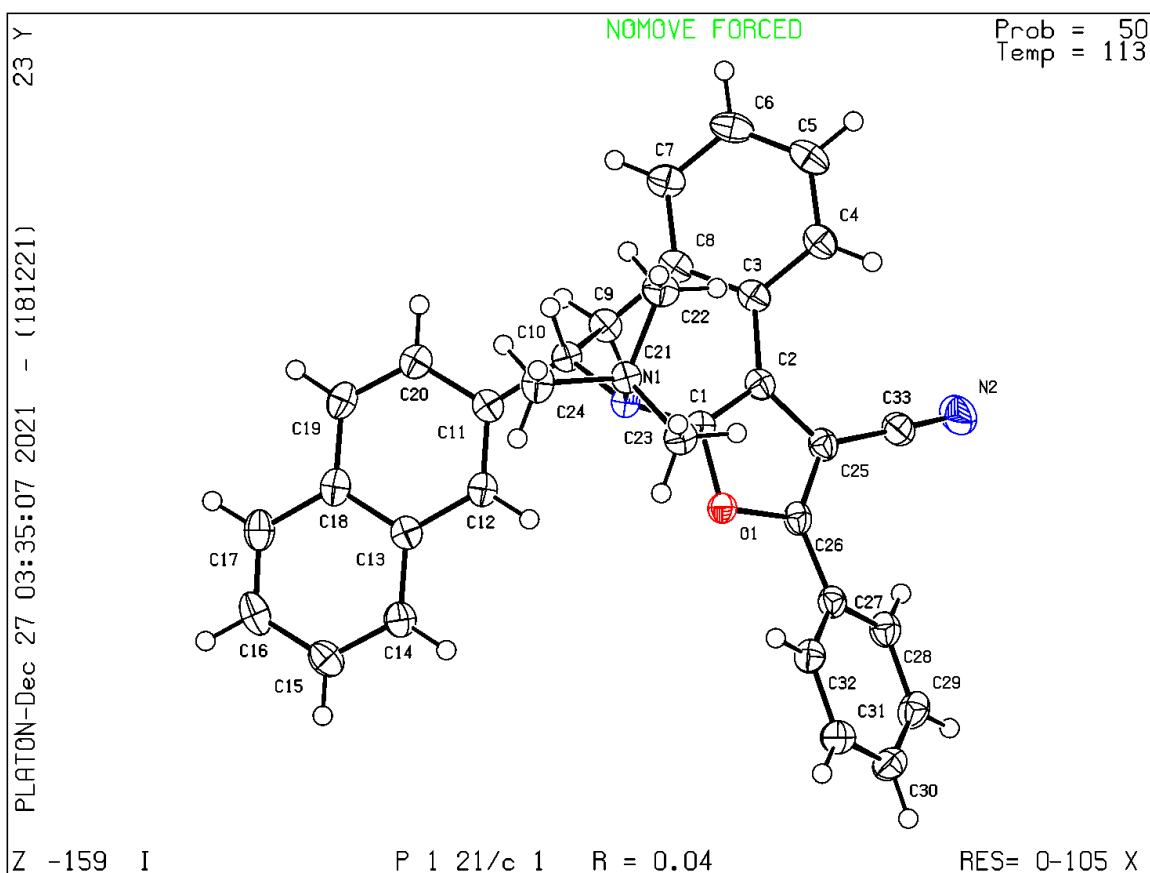



---

The following ALERTS were generated. Each ALERT has the format  
**test-name\_ALERT\_alert-type\_alert-level.**

Click on the hyperlinks for more details of the test.

---

 **Alert level C**

PLAT761\_ALERT\_1\_C CIF Contains no X-H Bonds ..... Please Check  
PLAT762\_ALERT\_1\_C CIF Contains no X-Y-H or H-Y-H Angles ..... Please Check

---

 **Alert level G**

PLAT003\_ALERT\_2\_G Number of Uiso or Uij Restrained non-H Atoms ... 3 Report  
PLAT005\_ALERT\_5\_G No Embedded Refinement Details Found in the CIF Please Do !  
PLAT398\_ALERT\_2\_G Deviating C-O-C Angle From 120 for O1 . 107.7 Degree  
PLAT793\_ALERT\_4\_G Model has Chirality at C19 (Centro SPGR) R Verify  
PLAT860\_ALERT\_3\_G Number of Least-Squares Restraints ..... 6 Note

---

- 0 **ALERT level A** = Most likely a serious problem - resolve or explain  
0 **ALERT level B** = A potentially serious problem, consider carefully  
2 **ALERT level C** = Check. Ensure it is not caused by an omission or oversight  
5 **ALERT level G** = General information/check it is not something unexpected

- 2 ALERT type 1 CIF construction/syntax error, inconsistent or missing data  
2 ALERT type 2 Indicator that the structure model may be wrong or deficient  
1 ALERT type 3 Indicator that the structure quality may be low  
1 ALERT type 4 Improvement, methodology, query or suggestion  
1 ALERT type 5 Informative message, check
- 

## checkCIF publication errors

---

 **Alert level A**

PUBL004\_ALERT\_1\_A The contact author's name and address are missing,  
\_publ\_contact\_author\_name and \_publ\_contact\_author\_address.  
PUBL005\_ALERT\_1\_A \_publ\_contact\_author\_email, \_publ\_contact\_author\_fax and  
\_publ\_contact\_author\_phone are all missing.  
At least one of these should be present.  
PUBL006\_ALERT\_1\_A \_publ\_requested\_journal is missing  
e.g. 'Acta Crystallographica Section C'  
PUBL008\_ALERT\_1\_A \_publ\_section\_title is missing. Title of paper.  
PUBL009\_ALERT\_1\_A \_publ\_author\_name is missing. List of author(s) name(s).  
PUBL010\_ALERT\_1\_A \_publ\_author\_address is missing. Author(s) address(es).  
PUBL012\_ALERT\_1\_A \_publ\_section\_abstract is missing.  
Abstract of paper in English.

---

- 7 **ALERT level A** = Data missing that is essential or data in wrong format  
0 **ALERT level G** = General alerts. Data that may be required is missing
-

## Publication of your CIF

You should attempt to resolve as many as possible of the alerts in all categories. Often the minor alerts point to easily fixed oversights, errors and omissions in your CIF or refinement strategy, so attention to these fine details can be worthwhile. In order to resolve some of the more serious problems it may be necessary to carry out additional measurements or structure refinements. However, the nature of your study may justify the reported deviations from journal submission requirements and the more serious of these should be commented upon in the discussion or experimental section of a paper or in the "special\_details" fields of the CIF. *checkCIF* was carefully designed to identify outliers and unusual parameters, but every test has its limitations and alerts that are not important in a particular case may appear. Conversely, the absence of alerts does not guarantee there are no aspects of the results needing attention. It is up to the individual to critically assess their own results and, if necessary, seek expert advice.

If level A alerts remain, which you believe to be justified deviations, and you intend to submit this CIF for publication in a journal, you should additionally insert an explanation in your CIF using the Validation Reply Form (VRF) below. This will allow your explanation to be considered as part of the review process.

## Validation response form

Please find below a validation response form (VRF) that can be filled in and pasted into your CIF.

```
# start Validation Reply Form
_vrf_PUBL004_GLOBAL
;
PROBLEM: The contact author's name and address are missing,
RESPONSE: ...
;
_vrf_PUBL005_GLOBAL
;
PROBLEM: _publ_contact_author_email, _publ_contact_author_fax and
RESPONSE: ...
;
_vrf_PUBL006_GLOBAL
;
PROBLEM: _publ_requested_journal is missing
RESPONSE: ...
;
_vrf_PUBL008_GLOBAL
;
PROBLEM: _publ_section_title is missing. Title of paper.
RESPONSE: ...
;
_vrf_PUBL009_GLOBAL
;
PROBLEM: _publ_author_name is missing. List of author(s) name(s).
RESPONSE: ...
;
_vrf_PUBL010_GLOBAL
;
PROBLEM: _publ_author_address is missing. Author(s) address(es).
```

```

RESPONSE: ...
;
_vrf_PUBL012_GLOBAL
;
PROBLEM: _publ_section_abstract is missing.
RESPONSE: ...
;
# end Validation Reply Form

```

If you wish to submit your CIF for publication in Acta Crystallographica Section C or E, you should upload your CIF via the web. If you wish to submit your CIF for publication in IUCrData you should upload your CIF via the web. If your CIF is to form part of a submission to another IUCr journal, you will be asked, either during electronic submission or by the Co-editor handling your paper, to upload your CIF via our web site.

**PLATON version of 19/02/2022; check.def file version of 19/01/2022**

Datablock I - ellipsoid plot

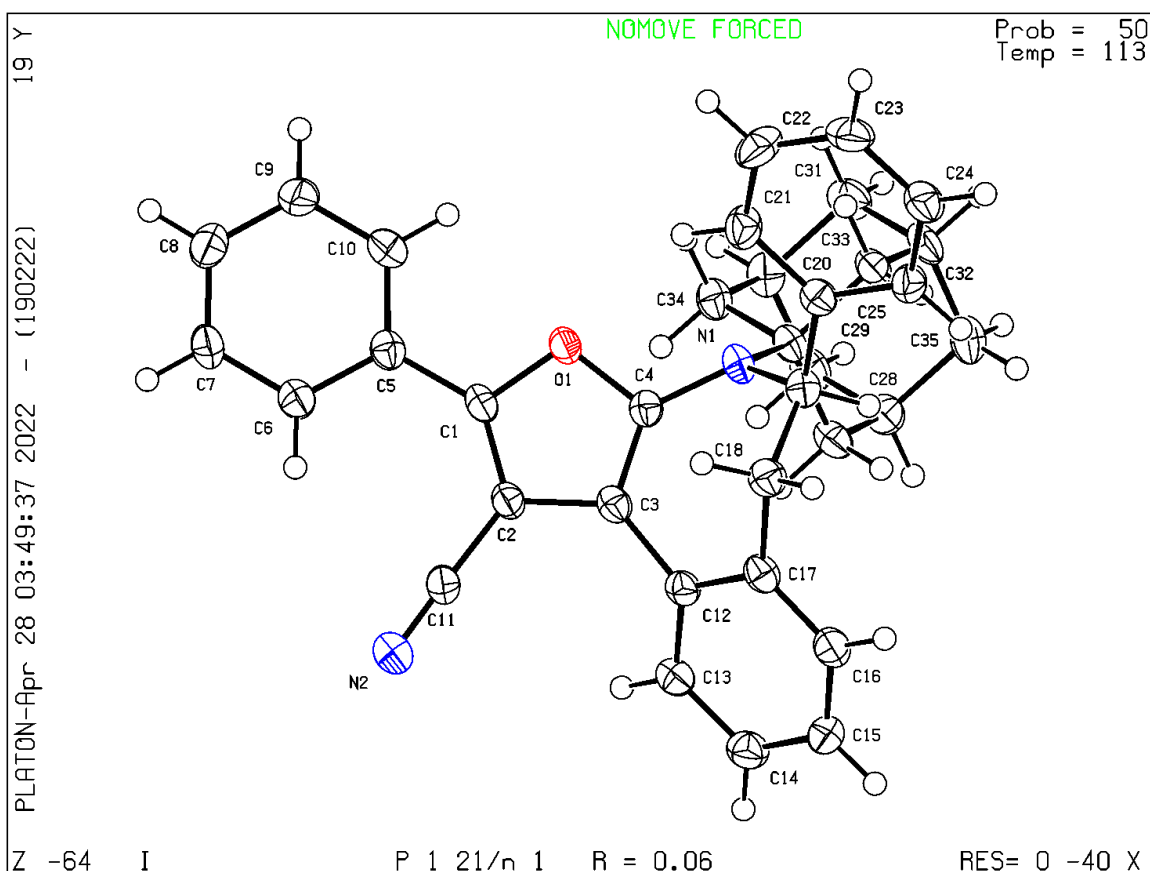

## checkCIF/PLATON report

You have not supplied any structure factors. As a result the full set of tests cannot be run.

THIS REPORT IS FOR GUIDANCE ONLY. IF USED AS PART OF A REVIEW PROCEDURE FOR PUBLICATION, IT SHOULD NOT REPLACE THE EXPERTISE OF AN EXPERIENCED CRYSTALLOGRAPHIC REFEREE.

No syntax errors found.      CIF dictionary      Interpreting this report

### Datablock: I

---

|                 |                |                    |              |
|-----------------|----------------|--------------------|--------------|
| Bond precision: | C-C = 0.0024 A | Wavelength=0.71073 |              |
| Cell:           | a=18.5654(4)   | b=11.0141(2)       | c=23.2460(5) |
|                 | alpha=90       | beta=104.797(2)    | gamma=90     |
| Temperature:    | 113 K          |                    |              |
|                 | Calculated     | Reported           |              |
| Volume          | 4595.73(17)    | 4595.73(17)        |              |
| Space group     | I 2/a          | I 1 2/a 1          |              |
| Hall group      | -I 2ya         | -I 2ya             |              |
| Moiety formula  | C29 H26 N2 O2  | 2(C29 H26 N2 O2)   |              |
| Sum formula     | C29 H26 N2 O2  | C58 H52 N4 O4      |              |
| Mr              | 434.52         | 869.03             |              |
| Dx,g cm-3       | 1.256          | 1.256              |              |
| Z               | 8              | 4                  |              |
| Mu (mm-1)       | 0.079          | 0.079              |              |
| F000            | 1840.0         | 1840.0             |              |
| F000'           | 1840.74        |                    |              |
| h,k,lmax        | 22,13,27       | 22,13,27           |              |
| Nref            | 4044           | 4039               |              |
| Tmin,Tmax       |                | 0.617,1.000        |              |
| Tmin'           |                |                    |              |

Correction method= # Reported T Limits: Tmin=0.617 Tmax=1.000  
AbsCorr = MULTI-SCAN

Data completeness= 0.999      Theta(max)= 24.999

R(reflections)= 0.0453( 3661)      wR2(reflections)= 0.1097( 4039)

S = 1.046      Npar= 301

---

The following ALERTS were generated. Each ALERT has the format  
**test-name\_ALERT\_alert-type\_alert-level.**  
Click on the hyperlinks for more details of the test.

---

**Alert level C**

PLAT053\_ALERT\_1\_C Minimum Crystal Dimension Missing (or Error) ... Please Check  
PLAT054\_ALERT\_1\_C Medium Crystal Dimension Missing (or Error) ... Please Check

---

**Alert level G**

PLAT005\_ALERT\_5\_G No Embedded Refinement Details Found in the CIF Please Do !  
PLAT042\_ALERT\_1\_G Calc. and Reported Moiety Formula Strings Differ Please Check  
PLAT045\_ALERT\_1\_G Calculated and Reported Z Differ by a Factor ... 2.00 Check  
PLAT793\_ALERT\_4\_G Model has Chirality at C18 (Centro SPGR) S Verify

---

0 **ALERT level A** = Most likely a serious problem - resolve or explain  
0 **ALERT level B** = A potentially serious problem, consider carefully  
2 **ALERT level C** = Check. Ensure it is not caused by an omission or oversight  
4 **ALERT level G** = General information/check it is not something unexpected

4 ALERT type 1 CIF construction/syntax error, inconsistent or missing data  
0 ALERT type 2 Indicator that the structure model may be wrong or deficient  
0 ALERT type 3 Indicator that the structure quality may be low  
1 ALERT type 4 Improvement, methodology, query or suggestion  
1 ALERT type 5 Informative message, check

---

## checkCIF publication errors

---

**Alert level A**

PUBL004\_ALERT\_1\_A The contact author's name and address are missing,  
\_publ\_contact\_author\_name and \_publ\_contact\_author\_address.  
PUBL005\_ALERT\_1\_A \_publ\_contact\_author\_email, \_publ\_contact\_author\_fax and  
\_publ\_contact\_author\_phone are all missing.  
At least one of these should be present.  
PUBL006\_ALERT\_1\_A \_publ\_requested\_journal is missing  
e.g. 'Acta Crystallographica Section C'  
PUBL008\_ALERT\_1\_A \_publ\_section\_title is missing. Title of paper.  
PUBL009\_ALERT\_1\_A \_publ\_author\_name is missing. List of author(s) name(s).  
PUBL010\_ALERT\_1\_A \_publ\_author\_address is missing. Author(s) address(es).  
PUBL012\_ALERT\_1\_A \_publ\_section\_abstract is missing.  
Abstract of paper in English.

---

7 **ALERT level A** = Data missing that is essential or data in wrong format  
0 **ALERT level G** = General alerts. Data that may be required is missing

---



## Publication of your CIF

You should attempt to resolve as many as possible of the alerts in all categories. Often the minor alerts point to easily fixed oversights, errors and omissions in your CIF or refinement strategy, so attention to these fine details can be worthwhile. In order to resolve some of the more serious problems it may be necessary to carry out additional measurements or structure refinements. However, the nature of your study may justify the reported deviations from journal submission requirements and the more serious of these should be commented upon in the discussion or experimental section of a paper or in the "special\_details" fields of the CIF. *checkCIF* was carefully designed to identify outliers and unusual parameters, but every test has its limitations and alerts that are not important in a particular case may appear. Conversely, the absence of alerts does not guarantee there are no aspects of the results needing attention. It is up to the individual to critically assess their own results and, if necessary, seek expert advice.

If level A alerts remain, which you believe to be justified deviations, and you intend to submit this CIF for publication in a journal, you should additionally insert an explanation in your CIF using the Validation Reply Form (VRF) below. This will allow your explanation to be considered as part of the review process.

## Validation response form

Please find below a validation response form (VRF) that can be filled in and pasted into your CIF.

```
# start Validation Reply Form
_vrf_PUBL004_GLOBAL
;
PROBLEM: The contact author's name and address are missing,
RESPONSE: ...
;
_vrf_PUBL005_GLOBAL
;
PROBLEM: _publ_contact_author_email, _publ_contact_author_fax and
RESPONSE: ...
;
_vrf_PUBL006_GLOBAL
;
PROBLEM: _publ_requested_journal is missing
RESPONSE: ...
;
_vrf_PUBL008_GLOBAL
;
PROBLEM: _publ_section_title is missing. Title of paper.
RESPONSE: ...
;
_vrf_PUBL009_GLOBAL
;
PROBLEM: _publ_author_name is missing. List of author(s) name(s).
RESPONSE: ...
;
_vrf_PUBL010_GLOBAL
;
PROBLEM: _publ_author_address is missing. Author(s) address(es).
RESPONSE: ...
;
_vrf_PUBL012_GLOBAL
;
```

PROBLEM: \_publ\_section\_abstract is missing.  
RESPONSE: ...  
;  
# end Validation Reply Form

If you wish to submit your CIF for publication in Acta Crystallographica Section C or E, you should upload your CIF via the web. If you wish to submit your CIF for publication in IUCrData you should upload your CIF via the web. If your CIF is to form part of a submission to another IUCr journal, you will be asked, either during electronic submission or by the Co-editor handling your paper, to upload your CIF via our web site.

---

**PLATON version of 03/06/2021; check.def file version of 02/06/2021**

Datablock I - ellipsoid plot

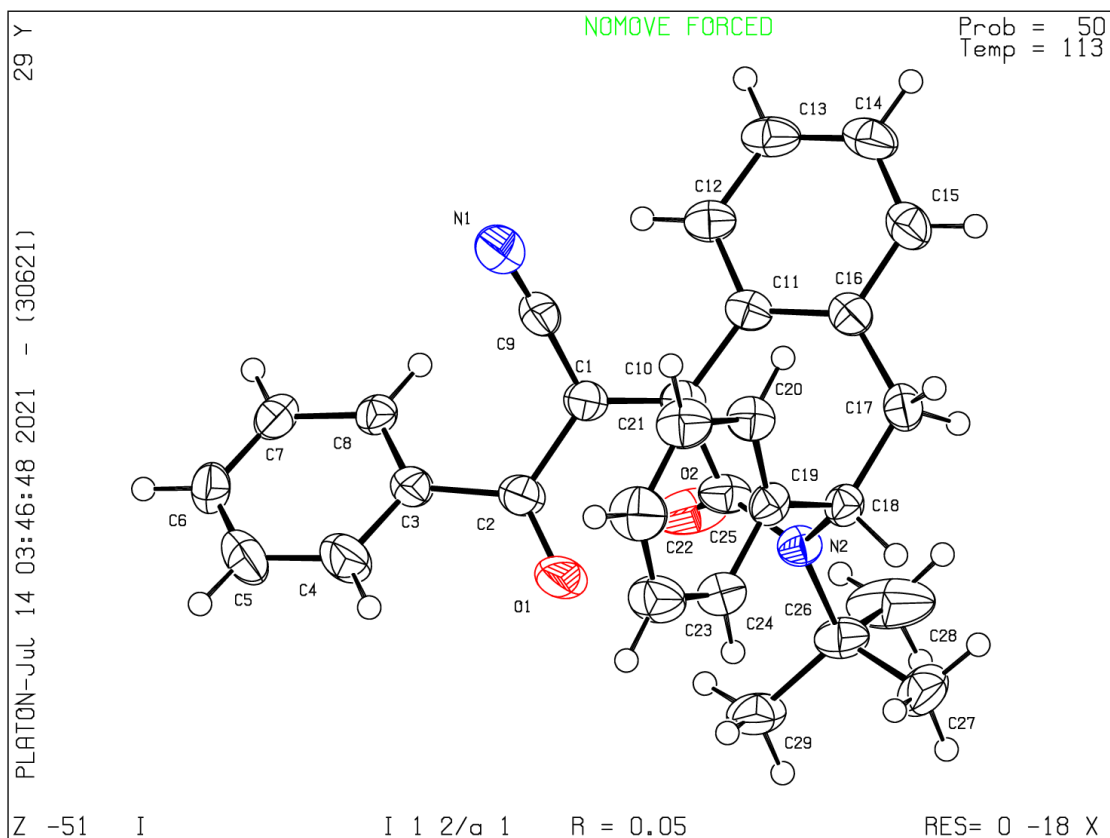

## checkCIF/PLATON report

You have not supplied any structure factors. As a result the full set of tests cannot be run.

THIS REPORT IS FOR GUIDANCE ONLY. IF USED AS PART OF A REVIEW PROCEDURE FOR PUBLICATION, IT SHOULD NOT REPLACE THE EXPERTISE OF AN EXPERIENCED CRYSTALLOGRAPHIC REFEREE.

No syntax errors found.      CIF dictionary      Interpreting this report

### Datablock: I

---

Bond precision:    C-C = 0.0051 A                      Wavelength=0.71073

Cell:                      a=9.1385(2)              b=17.3865(3)              c=23.9664(4)  
                                    alpha=90              beta=90                      gamma=90

Temperature:              113 K

|                | Calculated    | Reported         |
|----------------|---------------|------------------|
| Volume         | 3807.94(12)   | 3807.94(12)      |
| Space group    | P c a 21      | P c a 21         |
| Hall group     | P 2c -2ac     | P 2c -2ac        |
| Moiety formula | C25 H18 N2 O2 | 2(C25 H18 N2 O2) |
| Sum formula    | C25 H18 N2 O2 | C50 H36 N4 O4    |
| Mr             | 378.41        | 756.83           |
| Dx,g cm-3      | 1.320         | 1.320            |
| Z              | 8             | 4                |
| Mu (mm-1)      | 0.085         | 0.085            |
| F000           | 1584.0        | 1584.0           |
| F000'          | 1584.66       |                  |
| h,k,lmax       | 10,20,28      | 10,20,28         |
| Nref           | 6707[ 3446]   | 6705             |
| Tmin,Tmax      | 0.975,0.983   | 0.544,1.000      |
| Tmin'          | 0.975         |                  |

Correction method= # Reported T Limits: Tmin=0.544 Tmax=1.000  
AbsCorr = MULTI-SCAN

Data completeness= 1.95/1.00                      Theta(max)= 24.996

R(reflections)= 0.0572( 6222)                      wR2(reflections)= 0.1457( 6705)

S = 1.046                                              Npar= 524

---

The following ALERTS were generated. Each ALERT has the format

**test-name\_ALERT\_alert-type\_alert-level.**

Click on the hyperlinks for more details of the test.

---

### Alert level C

STRVA01\_ALERT\_2\_C Chirality of atom sites is inverted?  
From the CIF: `_refine_ls_abs_structure_Flack` 1.200  
From the CIF: `_refine_ls_abs_structure_Flack_su` 1.700

|                   |                                                                  |         |              |
|-------------------|------------------------------------------------------------------|---------|--------------|
| PLAT089_ALERT_3_C | Poor Data / Parameter Ratio (Zmax < 18) .....                    | 6.58    | Note         |
| PLAT094_ALERT_2_C | Ratio of Maximum / Minimum Residual Density ....                 | 2.08    | Report       |
| PLAT340_ALERT_3_C | Low Bond Precision on C-C Bonds .....                            | 0.00511 | Ang.         |
| PLAT369_ALERT_2_C | Long C(sp <sup>2</sup> )-C(sp <sup>2</sup> ) Bond C1 - C2 .      | 1.53    | Ang.         |
| PLAT369_ALERT_2_C | Long C(sp <sup>2</sup> )-C(sp <sup>2</sup> ) Bond C17 - C19 .    | 1.53    | Ang.         |
| PLAT761_ALERT_1_C | CIF Contains no X-H Bonds .....                                  |         | Please Check |
| PLAT762_ALERT_1_C | CIF Contains no X-Y-H or H-Y-H Angles .....                      |         | Please Check |
| PLAT790_ALERT_4_C | Centre of Gravity not Within Unit Cell: Resd. #<br>C25 H18 N2 O2 |         | 1 Note       |
| PLAT907_ALERT_2_C | Flack x > 0.5, Structure Needs to be Inverted? .                 | 1.20    | Check        |

---

### Alert level G

|                   |                                                                  |       |              |
|-------------------|------------------------------------------------------------------|-------|--------------|
| PLAT003_ALERT_2_G | Number of Uiso or Uij Restrained non-H Atoms ...                 | 58    | Report       |
| PLAT005_ALERT_5_G | No Embedded Refinement Details Found in the CIF                  |       | Please Do !  |
| PLAT007_ALERT_5_G | Number of Unrefined Donor-H Atoms .....                          | 2     | Report       |
| PLAT032_ALERT_4_G | Std. Uncertainty on Flack Parameter Value High .                 | 1.700 | Report       |
| PLAT042_ALERT_1_G | Calc. and Reported Moiety Formula Strings Differ                 |       | Please Check |
| PLAT045_ALERT_1_G | Calculated and Reported Z Differ by a Factor ...                 | 2.00  | Check        |
| PLAT072_ALERT_2_G | SHELXL First Parameter in WGHT Unusually Large                   | 0.12  | Report       |
| PLAT790_ALERT_4_G | Centre of Gravity not Within Unit Cell: Resd. #<br>C25 H18 N2 O2 |       | 2 Note       |
| PLAT792_ALERT_1_G | Model has Chirality at C10 (Polar SPGR)                          |       | S Verify     |
| PLAT792_ALERT_1_G | Model has Chirality at C35 (Polar SPGR)                          |       | R Verify     |
| PLAT860_ALERT_3_G | Number of Least-Squares Restraints .....                         | 1657  | Note         |

---

- 0 **ALERT level A** = Most likely a serious problem - resolve or explain  
0 **ALERT level B** = A potentially serious problem, consider carefully  
10 **ALERT level C** = Check. Ensure it is not caused by an omission or oversight  
11 **ALERT level G** = General information/check it is not something unexpected
- 6 ALERT type 1 CIF construction/syntax error, inconsistent or missing data  
7 ALERT type 2 Indicator that the structure model may be wrong or deficient  
3 ALERT type 3 Indicator that the structure quality may be low  
3 ALERT type 4 Improvement, methodology, query or suggestion  
2 ALERT type 5 Informative message, check
- 

## checkCIF publication errors

---

### Alert level A

PUBL004\_ALERT\_1\_A The contact author's name and address are missing,  
`_publ_contact_author_name` and `_publ_contact_author_address`.

PUBL005\_ALERT\_1\_A `_publ_contact_author_email`, `_publ_contact_author_fax` and  
`_publ_contact_author_phone` are all missing.  
At least one of these should be present.

PUBL006\_ALERT\_1\_A `_publ_requested_journal` is missing  
e.g. 'Acta Crystallographica Section C'

PUBL008\_ALERT\_1\_A `_publ_section_title` is missing. Title of paper.

PUBL009\_ALERT\_1\_A `_publ_author_name` is missing. List of author(s) name(s).

PUBL010\_ALERT\_1\_A `_publ_author_address` is missing. Author(s) address(es).

PUBL012\_ALERT\_1\_A \_publ\_section\_abstract is missing.  
Abstract of paper in English.

---

7 **ALERT level A** = Data missing that is essential or data in wrong format  
0 **ALERT level G** = General alerts. Data that may be required is missing

---

## Publication of your CIF

You should attempt to resolve as many as possible of the alerts in all categories. Often the minor alerts point to easily fixed oversights, errors and omissions in your CIF or refinement strategy, so attention to these fine details can be worthwhile. In order to resolve some of the more serious problems it may be necessary to carry out additional measurements or structure refinements. However, the nature of your study may justify the reported deviations from journal submission requirements and the more serious of these should be commented upon in the discussion or experimental section of a paper or in the "special\_details" fields of the CIF. *checkCIF* was carefully designed to identify outliers and unusual parameters, but every test has its limitations and alerts that are not important in a particular case may appear. Conversely, the absence of alerts does not guarantee there are no aspects of the results needing attention. It is up to the individual to critically assess their own results and, if necessary, seek expert advice.

If level A alerts remain, which you believe to be justified deviations, and you intend to submit this CIF for publication in a journal, you should additionally insert an explanation in your CIF using the Validation Reply Form (VRF) below. This will allow your explanation to be considered as part of the review process.

## Validation response form

Please find below a validation response form (VRF) that can be filled in and pasted into your CIF.

```
# start Validation Reply Form
_vrf_PUBL004_GLOBAL
;
PROBLEM: The contact author's name and address are missing,
RESPONSE: ...
;
_vrf_PUBL005_GLOBAL
;
PROBLEM: _publ_contact_author_email, _publ_contact_author_fax and
RESPONSE: ...
;
_vrf_PUBL006_GLOBAL
;
PROBLEM: _publ_requested_journal is missing
RESPONSE: ...
;
_vrf_PUBL008_GLOBAL
;
PROBLEM: _publ_section_title is missing. Title of paper.
RESPONSE: ...
;
_vrf_PUBL009_GLOBAL
;
PROBLEM: _publ_author_name is missing. List of author(s) name(s).
RESPONSE: ...
;
```

```

_vrf_PUBL010_GLOBAL
;
PROBLEM: _publ_author_address is missing. Author(s) address(es).
RESPONSE: ...
;
_vrf_PUBL012_GLOBAL
;
PROBLEM: _publ_section_abstract is missing.
RESPONSE: ...
;
# end Validation Reply Form

```

If you wish to submit your CIF for publication in Acta Crystallographica Section C or E, you should upload your CIF via the web. If you wish to submit your CIF for publication in IUCrData you should upload your CIF via the web. If your CIF is to form part of a submission to another IUCr journal, you will be asked, either during electronic submission or by the Co-editor handling your paper, to upload your CIF via our web site.

**PLATON version of 13/07/2021; check.def file version of 13/07/2021**

Datablock I - ellipsoid plot

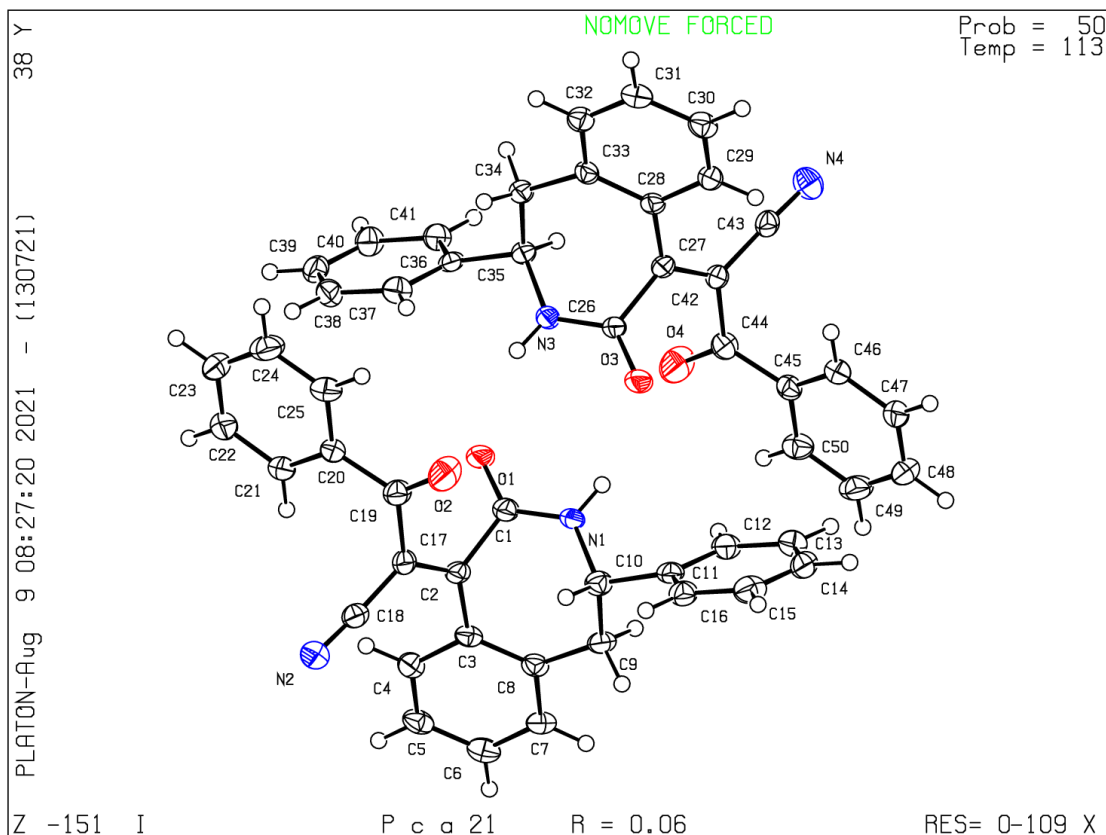

## checkCIF/PLATON report

You have not supplied any structure factors. As a result the full set of tests cannot be run.

THIS REPORT IS FOR GUIDANCE ONLY. IF USED AS PART OF A REVIEW PROCEDURE FOR PUBLICATION, IT SHOULD NOT REPLACE THE EXPERTISE OF AN EXPERIENCED CRYSTALLOGRAPHIC REFEREE.

No syntax errors found.      CIF dictionary      Interpreting this report

### Datablock: I

---

|                        |                  |                    |               |
|------------------------|------------------|--------------------|---------------|
| Bond precision:        | C-C = 0.0032 A   | Wavelength=0.71073 |               |
| Cell:                  | a=18.9264 (3)    | b=10.15909 (17)    | c=12.9510 (2) |
|                        | alpha=90         | beta=100.3841 (15) | gamma=90      |
| Temperature:           | 113 K            |                    |               |
|                        | Calculated       | Reported           |               |
| Volume                 | 2449.37 (7)      | 2449.37 (7)        |               |
| Space group            | P 21/c           | P 1 21/c 1         |               |
| Hall group             | -P 2ybc          | -P 2ybc            |               |
| Moiety formula         | C29 H27 Br N2 O2 | C29 H27 Br N2 O2   |               |
| Sum formula            | C29 H27 Br N2 O2 | C29 H27 Br N2 O2   |               |
| Mr                     | 515.43           | 515.43             |               |
| Dx, g cm <sup>-3</sup> | 1.398            | 1.398              |               |
| Z                      | 4                | 4                  |               |
| Mu (mm <sup>-1</sup> ) | 1.707            | 1.707              |               |
| F000                   | 1064.0           | 1064.0             |               |
| F000'                  | 1063.23          |                    |               |
| h, k, lmax             | 22, 12, 15       | 22, 12, 15         |               |
| Nref                   | 4314             | 4314               |               |
| Tmin, Tmax             | 0.815, 0.918     | 0.872, 1.000       |               |
| Tmin'                  | 0.815            |                    |               |

Correction method= # Reported T Limits: Tmin=0.872 Tmax=1.000  
AbsCorr = MULTI-SCAN

Data completeness= 1.000      Theta (max)= 24.994

|                                |                                  |
|--------------------------------|----------------------------------|
| R(reflections)= 0.0302 ( 3797) | wR2(reflections)= 0.0692 ( 4314) |
| S = 1.036                      | Npar= 311                        |

---

The following ALERTS were generated. Each ALERT has the format

**test-name\_ALERT\_alert-type\_alert-level.**

Click on the hyperlinks for more details of the test.

---

### Alert level G

|                   |                                                 |              |
|-------------------|-------------------------------------------------|--------------|
| PLAT005_ALERT_5_G | No Embedded Refinement Details Found in the CIF | Please Do !  |
| PLAT007_ALERT_5_G | Number of Unrefined Donor-H Atoms .....         | 2 Report     |
| PLAT398_ALERT_2_G | Deviating C-O-C Angle From 120 for O1 .         | 106.6 Degree |
| PLAT432_ALERT_2_G | Short Inter X...Y Contact Br1 ..C7 .            | 3.30 Ang.    |
|                   | x,1+y,z =                                       | 1_565 Check  |
| PLAT793_ALERT_4_G | Model has Chirality at C10 (Centro SPGR)        | S Verify     |

---

- 0 **ALERT level A** = Most likely a serious problem - resolve or explain
- 0 **ALERT level B** = A potentially serious problem, consider carefully
- 0 **ALERT level C** = Check. Ensure it is not caused by an omission or oversight
- 5 **ALERT level G** = General information/check it is not something unexpected

- 0 ALERT type 1 CIF construction/syntax error, inconsistent or missing data
  - 2 ALERT type 2 Indicator that the structure model may be wrong or deficient
  - 0 ALERT type 3 Indicator that the structure quality may be low
  - 1 ALERT type 4 Improvement, methodology, query or suggestion
  - 2 ALERT type 5 Informative message, check
- 

## checkCIF publication errors

---

### Alert level A

PUBL004\_ALERT\_1\_A The contact author's name and address are missing,  
\_publ\_contact\_author\_name and \_publ\_contact\_author\_address.

PUBL005\_ALERT\_1\_A \_publ\_contact\_author\_email, \_publ\_contact\_author\_fax and  
\_publ\_contact\_author\_phone are all missing.  
At least one of these should be present.

PUBL006\_ALERT\_1\_A \_publ\_requested\_journal is missing  
e.g. 'Acta Crystallographica Section C'

PUBL008\_ALERT\_1\_A \_publ\_section\_title is missing. Title of paper.

PUBL009\_ALERT\_1\_A \_publ\_author\_name is missing. List of author(s) name(s).

PUBL010\_ALERT\_1\_A \_publ\_author\_address is missing. Author(s) address(es).

PUBL012\_ALERT\_1\_A \_publ\_section\_abstract is missing.  
Abstract of paper in English.

---

- 7 **ALERT level A** = Data missing that is essential or data in wrong format
  - 0 **ALERT level G** = General alerts. Data that may be required is missing
-



## Publication of your CIF

You should attempt to resolve as many as possible of the alerts in all categories. Often the minor alerts point to easily fixed oversights, errors and omissions in your CIF or refinement strategy, so attention to these fine details can be worthwhile. In order to resolve some of the more serious problems it may be necessary to carry out additional measurements or structure refinements. However, the nature of your study may justify the reported deviations from journal submission requirements and the more serious of these should be commented upon in the discussion or experimental section of a paper or in the "special\_details" fields of the CIF. *checkCIF* was carefully designed to identify outliers and unusual parameters, but every test has its limitations and alerts that are not important in a particular case may appear. Conversely, the absence of alerts does not guarantee there are no aspects of the results needing attention. It is up to the individual to critically assess their own results and, if necessary, seek expert advice.

If level A alerts remain, which you believe to be justified deviations, and you intend to submit this CIF for publication in a journal, you should additionally insert an explanation in your CIF using the Validation Reply Form (VRF) below. This will allow your explanation to be considered as part of the review process.

## Validation response form

Please find below a validation response form (VRF) that can be filled in and pasted into your CIF.

```
# start Validation Reply Form
_vrf_PUBL004_GLOBAL
;
PROBLEM: The contact author's name and address are missing,
RESPONSE: ...
;
_vrf_PUBL005_GLOBAL
;
PROBLEM: _publ_contact_author_email, _publ_contact_author_fax and
RESPONSE: ...
;
_vrf_PUBL006_GLOBAL
;
PROBLEM: _publ_requested_journal is missing
RESPONSE: ...
;
_vrf_PUBL008_GLOBAL
;
PROBLEM: _publ_section_title is missing. Title of paper.
RESPONSE: ...
;
_vrf_PUBL009_GLOBAL
;
PROBLEM: _publ_author_name is missing. List of author(s) name(s).
RESPONSE: ...
;
_vrf_PUBL010_GLOBAL
;
PROBLEM: _publ_author_address is missing. Author(s) address(es).
```

```

RESPONSE: ...
;
_vrf_PUBL012_GLOBAL
;
PROBLEM: _publ_section_abstract is missing.
RESPONSE: ...
;
# end Validation Reply Form

```

If you wish to submit your CIF for publication in Acta Crystallographica Section C or E, you should upload your CIF via the web. If you wish to submit your CIF for publication in IUCrData you should upload your CIF via the web. If your CIF is to form part of a submission to another IUCr journal, you will be asked, either during electronic submission or by the Co-editor handling your paper, to upload your CIF via our web site.

**PLATON version of 20/01/2022; check.def file version of 19/01/2022**

Datablock I - ellipsoid plot

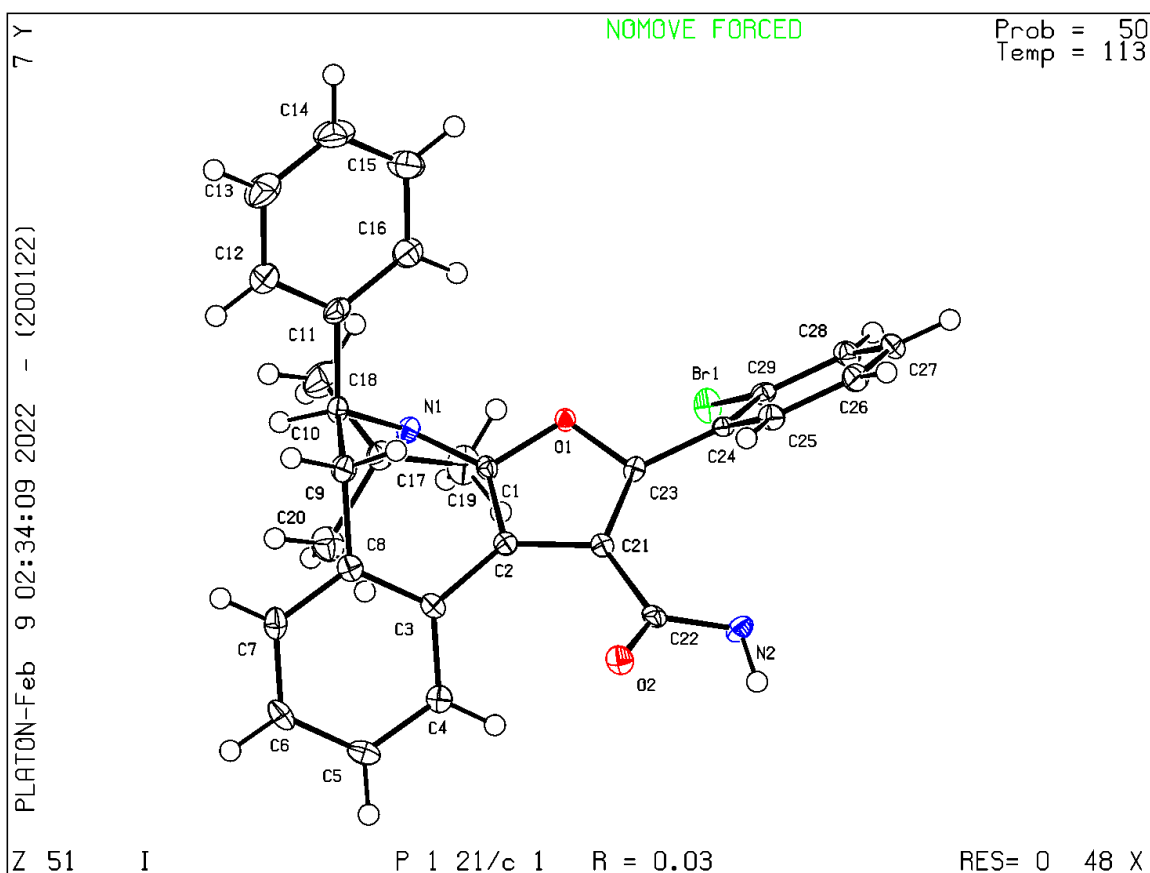

## checkCIF/PLATON report

You have not supplied any structure factors. As a result the full set of tests cannot be run.

THIS REPORT IS FOR GUIDANCE ONLY. IF USED AS PART OF A REVIEW PROCEDURE FOR PUBLICATION, IT SHOULD NOT REPLACE THE EXPERTISE OF AN EXPERIENCED CRYSTALLOGRAPHIC REFEREE.

No syntax errors found.    CIF dictionary    Interpreting this report

### Datablock: I

---

Bond precision:    C-C = 0.0020 A                                  Wavelength=0.71073  
Cell:                                  a=10.6050 (3)                  b=11.8204 (3)                  c=17.9554 (5)  
                                                alpha=90                          beta=92.512 (3)                  gamma=90  
Temperature:                          113 K

|                | Calculated    | Reported      |
|----------------|---------------|---------------|
| Volume         | 2248.64 (11)  | 2248.64 (11)  |
| Space group    | P 21/n        | P 1 21/n 1    |
| Hall group     | -P 2yn        | -P 2yn        |
| Moiety formula | C29 H26 N2 O2 | C29 H26 N2 O2 |
| Sum formula    | C29 H26 N2 O2 | C29 H26 N2 O2 |
| Mr             | 434.52        | 434.52        |
| Dx, g cm-3     | 1.283         | 1.283         |
| Z              | 4             | 4             |
| Mu (mm-1)      | 0.081         | 0.081         |
| F000           | 920.0         | 920.0         |
| F000'          | 920.37        |               |
| h, k, lmax     | 12, 14, 21    | 12, 14, 21    |
| Nref           | 3954          | 3954          |
| Tmin, Tmax     | 0.990, 0.992  | 0.464, 1.000  |
| Tmin'          | 0.984         |               |

Correction method= # Reported T Limits: Tmin=0.464 Tmax=1.000  
AbsCorr = MULTI-SCAN

Data completeness= 1.000

Theta (max)= 24.997

R(reflections)= 0.0400 ( 3257)

wR2(reflections)=  
0.1057 ( 3954)

S = 1.082

Npar= 301

---

The following ALERTS were generated. Each ALERT has the format  
**test-name\_ALERT\_alert-type\_alert-level.**

Click on the hyperlinks for more details of the test.

---

 **Alert level G**

|                   |                                                 |              |
|-------------------|-------------------------------------------------|--------------|
| PLAT005_ALERT_5_G | No Embedded Refinement Details Found in the CIF | Please Do !  |
| PLAT007_ALERT_5_G | Number of Unrefined Donor-H Atoms .....         | 1 Report     |
| PLAT398_ALERT_2_G | Deviating C-O-C Angle From 120 for O1 .         | 105.7 Degree |
| PLAT793_ALERT_4_G | Model has Chirality at C10 (Centro SPGR)        | R Verify     |

---

- 0 **ALERT level A** = Most likely a serious problem - resolve or explain
- 0 **ALERT level B** = A potentially serious problem, consider carefully
- 0 **ALERT level C** = Check. Ensure it is not caused by an omission or oversight
- 4 **ALERT level G** = General information/check it is not something unexpected

- 0 ALERT type 1 CIF construction/syntax error, inconsistent or missing data
  - 1 ALERT type 2 Indicator that the structure model may be wrong or deficient
  - 0 ALERT type 3 Indicator that the structure quality may be low
  - 1 ALERT type 4 Improvement, methodology, query or suggestion
  - 2 ALERT type 5 Informative message, check
- 

## checkCIF publication errors

---

 **Alert level A**

PUBL004\_ALERT\_1\_A The contact author's name and address are missing,  
\_publ\_contact\_author\_name and \_publ\_contact\_author\_address.

PUBL005\_ALERT\_1\_A \_publ\_contact\_author\_email, \_publ\_contact\_author\_fax and  
\_publ\_contact\_author\_phone are all missing.  
At least one of these should be present.

PUBL006\_ALERT\_1\_A \_publ\_requested\_journal is missing  
e.g. 'Acta Crystallographica Section C'

PUBL008\_ALERT\_1\_A \_publ\_section\_title is missing. Title of paper.

PUBL009\_ALERT\_1\_A \_publ\_author\_name is missing. List of author(s) name(s).

PUBL010\_ALERT\_1\_A \_publ\_author\_address is missing. Author(s) address(es).

PUBL012\_ALERT\_1\_A \_publ\_section\_abstract is missing.  
Abstract of paper in English.

---

- 7 **ALERT level A** = Data missing that is essential or data in wrong format
  - 0 **ALERT level G** = General alerts. Data that may be required is missing
-

## Publication of your CIF

You should attempt to resolve as many as possible of the alerts in all categories. Often the minor alerts point to easily fixed oversights, errors and omissions in your CIF or refinement strategy, so attention to these fine details can be worthwhile. In order to resolve some of the more serious problems it may be necessary to carry out additional measurements or structure refinements. However, the nature of your study may justify the reported deviations from journal submission requirements and the more serious of these should be commented upon in the discussion or experimental section of a paper or in the "special\_details" fields of the CIF. *checkCIF* was carefully designed to identify outliers and unusual parameters, but every test has its limitations and alerts that are not important in a particular case may appear. Conversely, the absence of alerts does not guarantee there are no aspects of the results needing attention. It is up to the individual to critically assess their own results and, if necessary, seek expert advice.

If level A alerts remain, which you believe to be justified deviations, and you intend to submit this CIF for publication in a journal, you should additionally insert an explanation in your CIF using the Validation Reply Form (VRF) below. This will allow your explanation to be considered as part of the review process.

## Validation response form

Please find below a validation response form (VRF) that can be filled in and pasted into your CIF.

```
# start Validation Reply Form
_vrf_PUBL004_GLOBAL
;
PROBLEM: The contact author's name and address are missing,
RESPONSE: ...
;
_vrf_PUBL005_GLOBAL
;
PROBLEM: _publ_contact_author_email, _publ_contact_author_fax and
RESPONSE: ...
;
_vrf_PUBL006_GLOBAL
;
PROBLEM: _publ_requested_journal is missing
RESPONSE: ...
;
_vrf_PUBL008_GLOBAL
;
PROBLEM: _publ_section_title is missing. Title of paper.
RESPONSE: ...
;
_vrf_PUBL009_GLOBAL
;
PROBLEM: _publ_author_name is missing. List of author(s) name(s).
RESPONSE: ...
;
_vrf_PUBL010_GLOBAL
;
PROBLEM: _publ_author_address is missing. Author(s) address(es).
```

```
RESPONSE: ...
;
_vrf_PUBL012_GLOBAL
;
PROBLEM: _publ_section_abstract is missing.
RESPONSE: ...
;
# end Validation Reply Form
```

If you wish to submit your CIF for publication in Acta Crystallographica Section C or E, you should upload your CIF via the web. If you wish to submit your CIF for publication in IUCrData you should upload your CIF via the web. If your CIF is to form part of a submission to another IUCr journal, you will be asked, either during electronic submission or by the Co-editor handling your paper, to upload your CIF via our web site.

---

**PLATON version of 19/02/2022; check.def file version of 19/01/2022**

Datablock I - ellipsoid plot

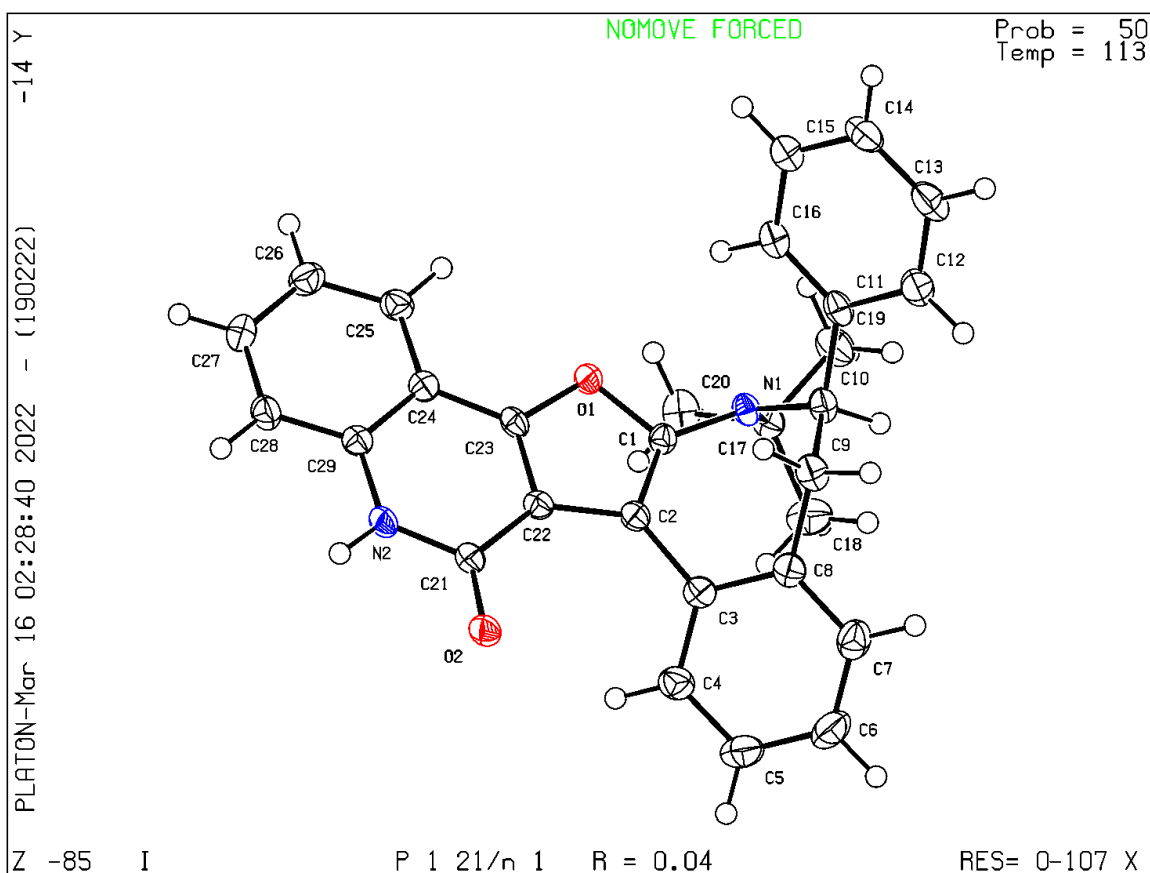

Supplement: d3gc02364h1.pdf [file d3gc02364h1.pdf]
